# Supplementary material for: Biomechanical Performance of BoneHelix® Compared with Elastic Stable Intramedullary Nailing (ESIN) in a Pediatric Tibia Fracture Model
Source: MDPI journal article supplement (doi:10.3390/life11111189), 2021-11-05
Supplement: s1 [file s1]

Supplementary material

Examples of fractures obtained after load-to-failure tests with ESIN and BoneHelix are shown in Figure S1 and Figure S2, respectively.

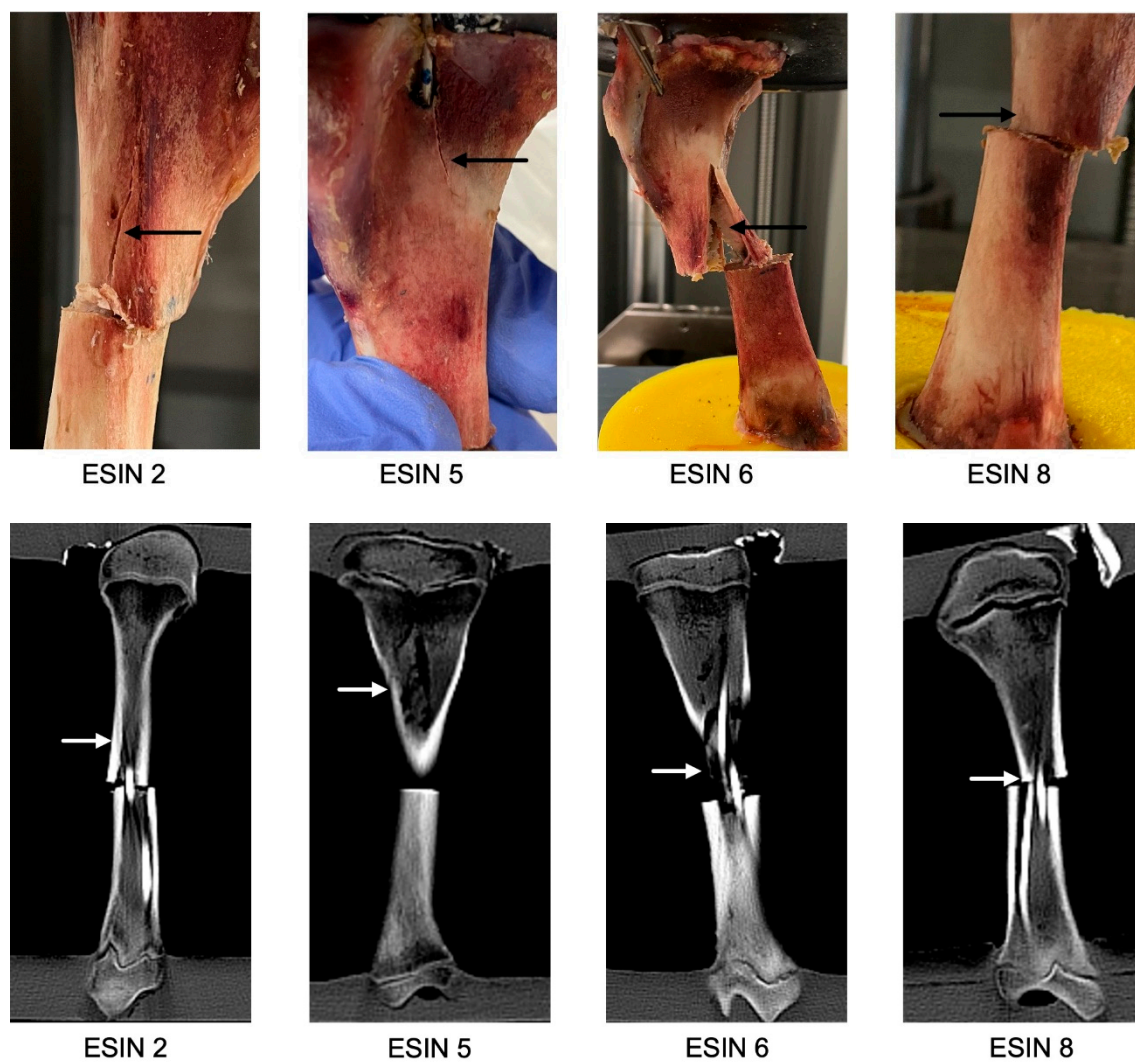

**Figure S1.** Images of specimens with ESIN implants after load to failure tests. Arrows indicate fractures.

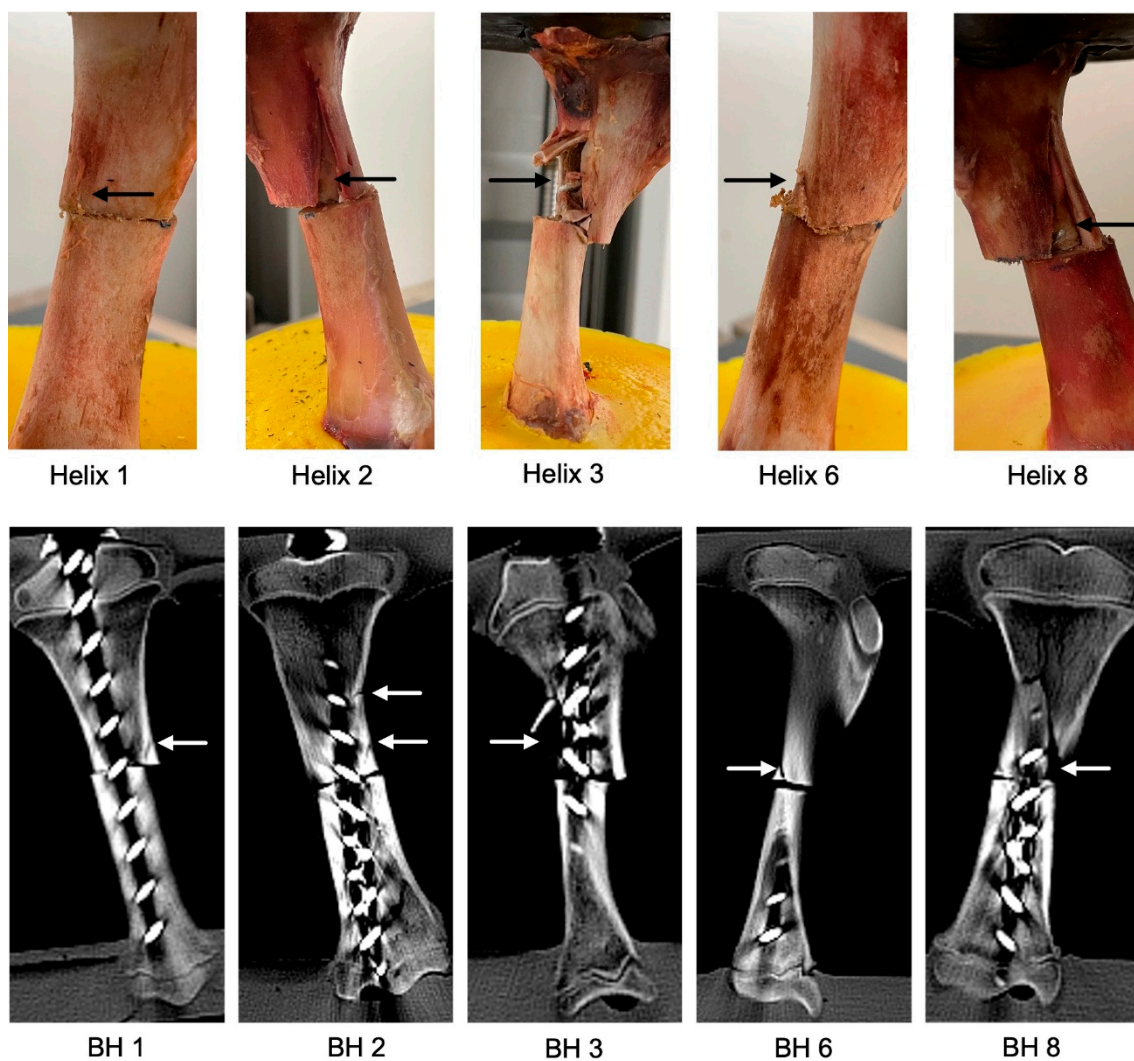

**Figure S2.** Images of specimens with BoneHelix implants after load to failure tests. Arrows indicate fractures.
