# Supplementary material for: Biomechanical Performance of BoneHelix® Compared with Elastic Stable Intramedullary Nailing (ESIN) in a Pediatric Tibia Fracture Model
Source: Life (Basel). 2021 Nov 5;11(11):1189. doi: 10.3390/life11111189 (PMC8622329; doi:10.3390/life11111189)
Supplement: Supplementary file 1 [file life-11-01189-s001.zip › Supplementary material Table S1 - Experimental data after load-to-failure tests of BoneHelix.xlsx]

## Sheet: Results
Specimen (Upper force limit)	Tool separation at start position	WA Weg Ende	WA Start Weg	trav weg start	trav weg ende	t VK	Fmax	FBreak	W to Fmax		F at failure (graph)	Type of failure
	mm	mm	mm	mm	mm	mm	N	N	Nmm		N
BH 1 (1000 N)	150.751	147.758	148.834	1219.47	1220.54	1113	1004.78		577.339
BH 1 (1500 N)	150.751	147.182	148.72	1219.58	1221.12	1219.7	1494.33		1205.98
BH 1 (2000 N)	150.751	146.66	148.503	1219.8	1221.64	1220.01	1997.05		1820.84
BH 1 (3000 N)	150.751	145.679	148.312	1219.99	1222.62	1220.18	3002.75		3860.77
BH 1 (4000 N)	150.751	144.8	147.994	1220.31		1220.63	3635.07	3213.98	4971.03		3635.07	bone
BH 2 (1000 N)	150.751	179.495	180.171	1188.13	1188.81	1155.95	1024.13		371.456
BH 2 (1500 N)	150.751	179.151	180.137	1188.16	1189.15	1188.2	1514.02		762.785
BH 2 (2000 N)	150.751	178.794	180.094	1188.21	1189.51	1188.25	2006.34		1253.34
BH 2 (3000 N)	150.751	178.149	180.054	1188.25	1190.15	1188.29	3001.86		2703.37
BH 2 (4000 N)	150.751	177.238	179.91	1188.39	1191.06	1188.53	3999.47		5282.71
BH 2 (5000 N)	150.751	176.158	179.641	1188.66	1192.14	1188.93	4990.12		8310.42
BH 2 (6000 N)	150.751	174.15	179.408	1188.89		1189.13	5673.91	5489.69	16160		5338.45	bone
BH 3 (1000 N)	150.751	150.095	150.803	1217.5	1218.21	1246.1	1011.9		397.079
BH 3 (1500 N)	150.751	149.673	150.73	1217.57	1218.63	1217.64	1504.06		840.406
BH 3 (2000 N)	150.751	149.249	150.592	1217.71	1219.05	1217.85	1989.01		1352.8
BH 3 (3000 N)	150.751	146.79	149.362	1218.94	1221.51	1219.28	2989.94		4523.42
BH 3 (4000 N)	150.751	144.81	148.378	1219.92	1223.49	1220.91	3992.76		8885.4
BH 3 (5000 N)	150.751	142.078	145.866	1222.44		1223.66	3760.98	3732.39	7377.02		3760.98	bone
BH 4 (1000 N)	150.751	144.79	145.645	1222.66	1223.51	1222.88	1015.06		453.422
BH 4 (1500 N)	150.751	144.396	145.577	1222.73	1223.91	1222.79	1512.45		898.203
BH 4 (2000 N)	150.751	143.976	145.474	1222.83	1224.33	1222.93	2008.63		1480.34
BH 4 (3000 N)	150.751	142.719	145.347	1222.95	1225.58	1223.08	2987.36		4327.38		2500	embedding
BH 5 (1000 N)	150.751	150.581	151.715	1216.59	1217.72	1202.86	1004.69		592.535
BH 5 (1500 N)	150.751	149.936	151.547	1216.75	1218.37	1216.92	1500.43		1244.32
BH 5 (2000 N)	150.751	149.37	151.521	1216.78	1218.93	1216.81	1993.66		2124.46
BH 5 (3000 N)	150.751	144.291	149.829	1218.47		1219.48	1823.99	1630.9	6520.96		1731.96	embedding
BH 6 (1000 N)	150.751	177.031	177.589	1190.71	1191.27	1160.5	1022.7		324.335
BH 6 (1500 N)	150.751	176.697	177.535	1190.77	1191.6	1190.82	1517.58		683.852
BH 6 (2000 N)	150.751	176.364	177.474	1190.83	1191.94	1190.89	2014.52		1157.38
BH 6 (3000 N)	150.751	175.728	177.384	1190.92	1192.57	1191.01	3011.67		2553.6
BH 6 (4000 N)	150.751	174.994	177.191	1191.11	1193.31	1191.3	3999.4		4518.1
BH 6 (5000 N)	150.751	174.053	176.897	1191.4	1194.25	1191.7	4993.11		7288.42
BH 6 (6000 N)	150.751	171.454	176.522	1191.78		1192.15	5799.98	5212.03	12613.1		5317.19	bone
BH 7 (1000 N)	150.751	157.299	158.006	1210.3	1211	1228.81	1013.42		405.665
BH 7 (1500 N)	150.751	156.9	157.908	1210.39	1211.4	1210.49	1513.49		806.893
BH 7 (2000 N)	150.751	156.5	157.817	1210.48	1211.8	1210.57	2012.52		1348.72
BH 7 (3000 N)	150.751	155.764	157.707	1210.6	1212.54	1210.71	2999.1		2931.09
BH 7 (4000 N)	150.751	154.152	157.459	1210.84	1214.15	1211.09	3988.48		7500.59
BH 7 (5000 N)	150.751	152.771	156.606	1211.7		1212.55	4040.67	3543.31	7977.51		4040.67	embedding
BH 8 (1000 N)	150.751	149.345	150.294	1218.01	1218.96	1222.83	1009.87		501.074
BH 8 (1500 N)	150.751	148.827	150.059	1218.24	1219.47	1218.48	1509.77		967.477
BH 8 (2000 N)	150.751	148.312	149.907	1218.39	1219.99	1218.55	2001.12		1612.37
BH 8 (3000 N)	150.751	146.665	149.746	1218.56	1221.64	1218.72	2990.98		5161.99
BH 8 (4000 N)	150.751	144.29	149.038	1219.26		1219.97	3700.41	3659.93	9306.89		3700.41	bone

## Sheet: BH 1
BH 1 (1000 N)				BH 1 (1500 N)				BH 1 (2000 N)				BH 1 (3000 N)				BH 1 (4000 N)
Standard travel	Displacement corrected	Standard force		Standard travel	Displacement corrected	Standard force		Standard travel	Displacement corrected	Standard force		Standard travel	Displacement corrected	Standard force		Standard travel	Displacement corrected	Standard force
mm	mm	N		mm	mm	N		mm	mm	N		mm	mm	N		mm	mm	N
0	-0.063813	113.796		0	-0.0725729	105.416		0	-0.0614942	114.929		0	-0.0533939	117.734		0	-0.0471119	120.927
-2.51055e-06	-0.0638156	112.715		3.03626e-06	-0.0725699	104.335		2.24233e-06	-0.0614919	113.887		-3.28302e-06	-0.0533972	116.592		-5.14984e-06	-0.0471171	119.927
-6.01888e-06	-0.0638191	111.704		-2.07067e-06	-0.072575	103.244		-1.94192e-06	-0.0614961	112.855		-5.86867e-06	-0.0533998	115.576		-9.74178e-06	-0.0471216	118.882
-9.63449e-06	-0.0638227	110.651		-6.71625e-06	-0.0725796	102.153		-3.5727e-06	-0.0614977	111.764		-8.62598e-06	-0.0534026	114.527		-8.23975e-06	-0.0471201	117.815
-3.91602e-06	-0.063817	109.545		0.00182322	-0.0707497	102.048		-5.2464e-06	-0.0614994	110.704		-6.15835e-06	-0.0534001	113.478		-1.01924e-05	-0.0471221	116.742
0.00128796	-0.0625251	109.03		0.00411595	-0.0684569	103.254		0.00412706	-0.0573671	112.166		0.00296756	-0.0504264	113.945		0.00293422	-0.0441777	117.328
0.00370407	-0.060109	110.068		0.00617888	-0.066394	104.583		0.00616288	-0.0553313	113.553		0.00472216	-0.0486718	115.011		0.00468909	-0.0424228	118.426
0.00567952	-0.0581335	111.29		0.00859973	-0.0639732	106.311		0.00857268	-0.0529215	115.362		0.00689662	-0.0464973	116.508		0.00684913	-0.0402628	119.96
0.00804167	-0.0557714	112.962		0.0114067	-0.0611662	108.375		0.00994701	-0.0515472	116.401		0.00944765	-0.0439463	118.384		0.00939691	-0.037715	121.876
0.0107766	-0.0530364	114.996		0.0129544	-0.0596185	109.495		0.0114261	-0.050068	117.511		0.0108762	-0.0425177	119.44		0.010815	-0.0362969	122.948
0.012295	-0.051518	116.11		0.0146057	-0.0579672	110.676		0.0130159	-0.0484783	118.685		0.0124084	-0.0409855	120.559		0.0123301	-0.0347818	124.09
0.013918	-0.0498951	117.295		0.0163592	-0.0562137	111.915		0.0147	-0.0467942	119.918		0.0140339	-0.0393601	121.743		0.0139563	-0.0331556	125.298
0.0156473	-0.0481657	118.545		0.0182208	-0.0543521	113.21		0.0164706	-0.0450236	121.202		0.0157261	-0.0376679	122.996		0.0156785	-0.0314334	126.58
0.0174434	-0.0463697	119.869		0.0201789	-0.052394	114.558		0.0183272	-0.043167	122.544		0.0175276	-0.0358663	124.314		0.0174937	-0.0296182	127.928
0.0193578	-0.0444552	121.262		0.0222416	-0.0503313	115.961		0.020287	-0.0412072	123.937		0.0194473	-0.0339466	125.705		0.0194177	-0.0276942	129.339
0.0214145	-0.0423986	122.715		0.0244143	-0.0481586	117.422		0.0223334	-0.0391608	125.377		0.0214274	-0.0319666	127.171		0.0214274	-0.0256845	130.823
0.0235731	-0.04024	124.228		0.026696	-0.0458769	118.938		0.024465	-0.0370292	126.876		0.0235364	-0.0298576	128.703		0.0235543	-0.0235576	132.363
0.0258212	-0.0379918	125.793		0.0290537	-0.0435192	120.509		0.0267028	-0.0347914	128.424		0.0257626	-0.0276314	130.293		0.0257838	-0.0213281	133.974
0.0281816	-0.0356314	127.418		0.0315023	-0.0410706	122.134		0.0290361	-0.0324581	130.018		0.0281021	-0.0252919	131.946		0.0281332	-0.0189787	135.647
0.0306209	-0.0331921	129.096		0.0340603	-0.0385126	123.817		0.0315082	-0.0299859	131.658		0.0305549	-0.022839	133.655		0.0305823	-0.0165296	137.378
0.0331127	-0.0307003	130.837		0.0367209	-0.035852	125.552		0.0340877	-0.0274064	133.347		0.0330626	-0.0203313	135.428		0.0331322	-0.0139797	139.164
0.0357071	-0.0281059	132.619		0.0395191	-0.0330538	127.336		0.036754	-0.0247402	135.082		0.0356487	-0.0177452	137.258		0.0357507	-0.0113612	141.007
0.0383976	-0.0254154	134.457		0.0424138	-0.0301591	129.174		0.03949	-0.0220042	136.88		0.0383299	-0.015064	139.142		0.038471	-0.00864095	142.909
0.0411994	-0.0226137	136.349		0.0454072	-0.0271657	131.079		0.0423019	-0.0191923	138.733		0.0411165	-0.0122774	141.077		0.0412624	-0.00584947	144.87
0.0441269	-0.0196862	138.285		0.0484638	-0.0241091	133.056		0.0452353	-0.0162588	140.632		0.0440223	-0.00937159	143.054		0.0441205	-0.00299138	146.901
0.0471465	-0.0166666	140.281		0.0515982	-0.0209747	135.094		0.048292	-0.0132021	142.58		0.0470568	-0.0063371	145.081		0.0471119	0	148.997
0.0502297	-0.0135834	142.357		0.0548197	-0.0177532	137.202		0.0514734	-0.0100208	144.581		0.0501895	-0.00320447	147.171		0.0502476	0.00313572	151.168
0.0534425	-0.0103705	144.492		0.0581463	-0.0144266	139.376		0.0547503	-0.00674386	146.648		0.0533939	0	149.335		0.0534907	0.00637875	153.41
0.0567543	-0.00705874	146.683		0.0616169	-0.010956	141.631		0.0580841	-0.00341006	148.78		0.0566598	0.0032659	151.572		0.0567948	0.00968288	155.735
0.0602145	-0.00359856	148.939		0.0651896	-0.00738331	143.966		0.0614942	0	150.978		0.0600619	0.00666794	153.876		0.0601831	0.0130712	158.126
0.063813	0	151.242		0.0688427	-0.00373022	146.395		0.0650382	0.00354403	153.226		0.0636086	0.0102146	156.237		0.0637151	0.0166032	160.578
0.0674975	0.00368445	153.623		0.0725729	0	148.915		0.0687413	0.00724709	155.529		0.0672864	0.0138924	158.666		0.0674096	0.0202977	163.101
0.0712182	0.00740514	156.071		0.0763922	0.00381935	151.527		0.0725759	0.0110818	157.866		0.0710652	0.0176712	161.179		0.071194	0.0240821	165.694
0.0749858	0.0111728	158.564		0.0803542	0.00778131	154.223		0.0764716	0.0149774	160.228		0.0748909	0.0214969	163.776		0.0749718	0.0278599	168.363
0.0788705	0.0150575	161.12		0.0844469	0.011874	157.007		0.080436	0.0189418	162.618		0.0787552	0.0253613	166.462		0.0788026	0.0316907	171.096
0.0829105	0.0190975	163.743		0.0886035	0.0160306	159.874		0.0844825	0.0229884	165.022		0.0827338	0.0293398	169.238		0.0827554	0.0356435	173.888
0.0870398	0.0232267	166.415		0.0928401	0.0202672	162.813		0.0886357	0.0271415	167.44		0.086895	0.0335011	172.102		0.0868916	0.0397797	176.744
0.0912174	0.0274044	169.148		0.0972032	0.0246303	165.826		0.0929068	0.0314126	169.882		0.0911348	0.0377409	175.041		0.0911376	0.0440257	179.673
0.0954583	0.0316453	171.964		0.101735	0.0291623	168.912		0.0972243	0.0357301	172.335		0.0954372	0.0420433	178.042		0.0954544	0.0483425	182.665
0.0998225	0.0360095	174.865		0.106346	0.033773	172.067		0.101632	0.0401381	174.789		0.0998932	0.0464992	181.105		0.099799	0.0526871	185.734
0.10437	0.0405567	177.872		0.110939	0.0383662	175.293		0.106224	0.0447301	177.259		0.104508	0.0511136	184.242		0.10428	0.057168	188.902
0.108974	0.0451614	180.984		0.11563	0.0430575	178.59		0.111007	0.0495124	179.765		0.109213	0.0558193	187.448		0.108954	0.061842	192.176
0.113619	0.0498058	184.199		0.120484	0.0479107	181.925		0.115834	0.0543397	182.318		0.113942	0.0605478	190.71		0.11367	0.0665585	195.549
0.118414	0.0546006	187.53		0.125447	0.0528737	185.268		0.120629	0.059135	184.933		0.118705	0.0653111	194.021		0.118434	0.0713218	199.003
0.123399	0.0595863	190.983		0.130493	0.0579203	188.678		0.125528	0.0640334	187.647		0.123591	0.070197	197.387		0.12336	0.0762481	202.542
0.128462	0.0646494	194.543		0.135691	0.063118	192.186		0.130569	0.0690749	190.481		0.1286	0.0752062	200.798		0.128487	0.0813751	206.171
0.133548	0.0697347	198.218		0.141049	0.0684759	195.82		0.135683	0.074189	193.418		0.133666	0.0802724	204.245		0.133692	0.0865802	209.883
0.138725	0.0749117	202.041		0.146455	0.0738825	199.564		0.14087	0.079376	196.45		0.138786	0.0853925	207.749		0.138899	0.091787	213.674
0.14403	0.0802172	205.987		0.151835	0.0792624	203.415		0.146226	0.0847317	199.608		0.144095	0.0907011	211.341		0.144211	0.0970987	217.56
0.149421	0.0856079	210.026		0.15734	0.0847669	207.378		0.15172	0.0902262	202.896		0.149526	0.096132	215.03		0.149614	0.102502	221.536
0.154979	0.0911659	214.172		0.16301	0.0904368	211.45		0.157274	0.09578	206.304		0.154957	0.101563	218.808		0.155098	0.107986	225.586
0.160727	0.0969144	218.415		0.168723	0.0961506	215.641		0.162915	0.101421	209.844		0.160524	0.10713	222.67		0.160765	0.113653	229.69
0.166536	0.102723	222.755		0.174516	0.101943	220.002		0.168713	0.107218	213.527		0.166292	0.112898	226.618		0.166569	0.119457	233.851
0.1723	0.108487	227.211		0.180491	0.107918	224.552		0.174588	0.113094	217.365		0.172155	0.118761	230.673		0.172371	0.12526	238.089
0.178163	0.11435	231.793		0.186539	0.113966	229.227		0.180497	0.119002	221.342		0.17807	0.124676	234.836		0.178221	0.131109	242.43
0.184169	0.120356	236.494		0.192686	0.120113	234.025		0.186551	0.125057	225.453		0.184112	0.130718	239.101		0.184176	0.137064	246.883
0.190229	0.126416	241.294		0.198997	0.126424	238.932		0.192769	0.131275	229.717		0.190224	0.13683	243.474		0.190178	0.143066	251.438
0.196422	0.132609	246.175		0.205393	0.132821	243.983		0.199086	0.137592	234.159		0.196503	0.143109	247.96		0.196269	0.149157	256.084
0.202786	0.138973	251.139		0.211801	0.139228	249.175		0.205503	0.144008	238.777		0.202944	0.14955	252.544		0.202543	0.155431	260.817
0.209256	0.145443	256.208		0.218333	0.14576	254.47		0.211978	0.150484	243.56		0.209398	0.156004	257.226		0.209004	0.161892	265.64
0.215815	0.152002	261.367		0.224974	0.152401	259.861		0.21843	0.156936	248.503		0.215893	0.1625	262.038		0.215574	0.168462	270.574
0.222451	0.158638	266.626		0.231797	0.159224	265.365		0.22505	0.163556	253.601		0.222512	0.169118	266.987		0.222237	0.175125	275.635
0.229127	0.165314	271.99		0.238783	0.16621	270.975		0.231815	0.170321	258.879		0.229205	0.175811	272.088		0.228984	0.181872	280.818
0.235889	0.172076	277.433		0.245719	0.173146	276.701		0.238572	0.177078	264.331		0.235949	0.182555	277.333		0.235793	0.188681	286.124
0.242779	0.178966	282.929		0.252667	0.180094	282.537		0.24542	0.183925	269.924		0.242796	0.189402	282.697		0.242746	0.195634	291.524
0.249814	0.186001	288.501		0.259757	0.187184	288.499		0.252392	0.190897	275.661		0.249756	0.196362	288.202		0.249853	0.202741	297.025
0.257043	0.19323	294.163		0.266972	0.194399	294.616		0.259579	0.198085	281.558		0.256891	0.203497	293.862		0.25711	0.209998	302.627
0.264293	0.20048	299.907		0.274338	0.201765	300.851		0.267016	0.205522	287.617		0.264156	0.210762	299.684		0.264408	0.217296	308.315
0.271524	0.207711	305.745		0.281731	0.209158	307.174		0.274407	0.212913	293.822		0.271405	0.218011	305.675		0.2717	0.224588	314.104
0.278912	0.215099	311.696		0.289257	0.216684	313.621		0.281799	0.220305	300.153		0.278701	0.225307	311.838		0.279094	0.231982	320.012
0.286406	0.222593	317.765		0.297063	0.22449	320.239		0.28935	0.227855	306.618		0.286187	0.232793	318.157		0.286602	0.239491	326.05
0.293977	0.230164	323.912		0.304945	0.232372	327.006		0.297158	0.235664	313.213		0.293893	0.240499	324.605		0.294063	0.246951	332.206
0.301618	0.237805	330.137		0.312788	0.240215	333.889		0.305173	0.243678	319.928		0.301746	0.248352	331.163		0.301632	0.25452	338.461
0.30943	0.245617	336.482		0.320635	0.248062	340.897		0.313036	0.251542	326.757		0.309576	0.256182	337.846		0.309354	0.262242	344.827
0.317506	0.253692	342.978		0.328765	0.256192	348.052		0.320843	0.259349	333.73		0.317507	0.264113	344.689		0.317341	0.27023	351.352
0.325549	0.261736	349.571		0.33707	0.264497	355.339		0.328739	0.267245	340.868		0.325509	0.272115	351.686		0.325472	0.27836	358.032
0.333565	0.269752	356.237		0.345286	0.272713	362.728		0.336856	0.275362	348.165		0.33356	0.280166	358.794		0.333524	0.286413	364.83
0.341733	0.27792	362.997		0.353517	0.280944	370.238		0.34512	0.283626	355.576		0.341792	0.288398	366.019		0.34162	0.294508	371.746
0.350227	0.286414	369.869		0.361854	0.289281	377.884		0.353363	0.291869	363.112		0.350171	0.296777	373.391		0.350029	0.302917	378.786
0.358772	0.294959	376.835		0.37039	0.297817	385.676		0.361782	0.300288	370.824		0.358741	0.305347	380.923		0.35877	0.311659	385.954
0.367159	0.303346	383.89		0.379115	0.306543	393.599		0.370399	0.308905	378.71		0.367187	0.313793	388.552		0.367363	0.320251	393.22
0.375606	0.311793	391.085		0.387938	0.315365	401.664		0.379126	0.317632	386.77		0.375649	0.322255	396.302		0.375852	0.32874	400.62
0.38423	0.320417	398.416		0.396771	0.324198	409.885		0.387891	0.326397	394.971		0.384357	0.330963	404.214		0.384413	0.337301	408.204
0.393098	0.329285	405.834		0.405682	0.333109	418.264		0.396859	0.335365	403.337		0.393388	0.339994	412.285		0.393189	0.346077	415.931
0.401981	0.338168	413.31		0.414811	0.342238	426.785		0.405898	0.344404	411.87		0.402278	0.348884	420.488		0.40202	0.354908	423.746
0.411014	0.347201	420.898		0.424083	0.35151	435.393		0.414985	0.35349	420.549		0.411121	0.357727	428.863		0.410962	0.36385	431.671
0.420262	0.356448	428.618		0.433338	0.360765	444.107		0.42409	0.362596	429.339		0.420173	0.366779	437.476		0.420126	0.373014	439.766
0.429566	0.365753	436.462		0.442623	0.37005	452.976		0.433246	0.371752	438.246		0.429407	0.376013	446.269		0.429415	0.382303	448.033
0.438889	0.375076	444.411		0.452058	0.379485	462.013		0.442568	0.381074	447.288		0.438675	0.385281	455.167		0.438696	0.391584	456.468
0.448363	0.38455	452.479		0.461442	0.388869	471.186		0.452024	0.39053	456.479		0.448087	0.394693	464.178		0.448162	0.401051	465.082
0.457902	0.394089	460.654		0.470929	0.398356	480.496		0.461553	0.400059	465.835		0.457774	0.40438	473.375		0.45776	0.410648	473.888
0.467439	0.403626	468.901		0.480727	0.408155	489.962		0.471061	0.409567	475.347		0.467546	0.414152	482.725		0.467416	0.420304	482.797
0.477039	0.413226	477.201		0.490757	0.418184	499.526		0.48076	0.419266	484.964		0.477202	0.423808	492.182		0.477071	0.42996	491.689
0.486814	0.423001	485.588		0.500688	0.428115	509.137		0.49073	0.429235	494.637		0.487005	0.433611	501.776		0.486815	0.439704	500.575
0.49677	0.432957	494.076		0.510653	0.43808	518.799		0.500749	0.439255	504.389		0.496936	0.443542	511.516		0.496776	0.449664	509.594
0.50679	0.442977	502.641		0.520936	0.448363	528.564		0.510789	0.449295	514.228		0.506802	0.453408	521.326		0.506788	0.459676	518.798
0.516707	0.452894	511.279		0.5311	0.458527	538.416		0.520765	0.45927	524.128		0.516509	0.463115	531.146		0.51645	0.469338	528.143
0.526626	0.462813	519.942		0.540919	0.468346	548.339		0.530643	0.469149	534.105		0.526358	0.472964	541.016		0.525823	0.478711	537.609
0.536722	0.472909	528.6		0.550668	0.478095	558.32		0.540631	0.479137	544.193		0.53648	0.483086	550.998		0.535645	0.488533	547.14
0.546844	0.483031	537.244		0.560615	0.488043	568.329		0.55082	0.489326	554.31		0.546594	0.4932	561.051		0.546131	0.499019	556.684
0.556817	0.493004	545.922		0.570509	0.497936	578.335		0.560805	0.499311	564.391		0.556567	0.503173	571.146		0.556483	0.509371	566.266
0.566725	0.502912	554.615		0.580492	0.507919	588.325		0.570644	0.50915	574.449		0.566583	0.513189	581.276		0.566559	0.519447	575.957
0.576536	0.512723	563.338		0.590613	0.51804	598.339		0.580725	0.519231	584.559		0.57678	0.523386	591.422		0.576539	0.529427	585.82
0.586374	0.522561	572.109		0.600667	0.528094	608.405		0.590904	0.52941	594.729		0.586947	0.533553	601.552		0.586463	0.539351	595.877
0.596446	0.532633	580.912		0.610708	0.538135	618.539		0.600757	0.539263	604.963		0.596933	0.543539	611.693		0.596414	0.549302	606.032
0.606582	0.542769	589.689		0.620802	0.548229	628.718		0.610585	0.549091	615.277		0.606884	0.55349	621.871		0.606594	0.559482	616.141
0.616546	0.552733	598.438		0.630885	0.558312	638.918		0.620558	0.559064	625.661		0.616689	0.563295	632.076		0.616633	0.569521	626.192
0.626651	0.562838	607.209		0.640821	0.568248	649.068		0.630529	0.569035	636.074		0.626489	0.573095	642.348		0.626533	0.579421	636.248
0.636946	0.573133	616.019		0.650701	0.578128	659.179		0.640514	0.579019	646.481		0.636487	0.583093	652.681		0.636711	0.589599	646.369
0.646961	0.583148	624.874		0.660695	0.588122	669.331		0.650705	0.589211	656.94		0.64658	0.593187	663.011		0.646875	0.599763	656.572
0.656808	0.592994	633.772		0.670722	0.598149	679.535		0.660851	0.599357	667.468		0.656511	0.603117	673.315		0.656689	0.609577	666.863
0.666683	0.60287	642.702		0.680614	0.608041	689.784		0.670793	0.609299	678.065		0.666493	0.6131	683.637		0.666483	0.619371	677.219
0.676605	0.612792	651.637		0.690416	0.617843	700.082		0.680808	0.619314	688.752		0.676845	0.623451	694.007		0.676491	0.629379	687.606
0.686483	0.62267	660.554		0.700412	0.627839	710.387		0.690807	0.629312	699.531		0.686991	0.633598	704.422		0.68646	0.639348	698.018
0.696566	0.632753	669.469		0.71059	0.638017	720.675		0.700652	0.639158	710.328		0.696834	0.64344	714.896		0.696512	0.6494	708.441
0.706691	0.642878	678.417		0.720679	0.648106	730.979		0.710405	0.648911	721.097		0.706667	0.653273	725.431		0.706708	0.659597	718.922
0.716663	0.652849	687.385		0.730736	0.658163	741.309		0.720379	0.658885	731.918		0.716609	0.663215	736.008		0.716757	0.669645	729.466
0.726716	0.662903	696.393		0.740685	0.668112	751.675		0.730495	0.669001	742.842		0.726473	0.673079	746.581		0.726735	0.679623	740.054
0.73684	0.673027	705.462		0.750613	0.67804	762.118		0.740574	0.67908	753.81		0.736448	0.683054	757.145		0.736832	0.68972	750.695
0.746898	0.683085	714.523		0.76068	0.688107	772.614		0.750546	0.689052	764.827		0.746575	0.693181	767.766		0.746861	0.699749	761.385
0.756758	0.692945	723.514		0.770822	0.69825	783.093		0.760618	0.699124	775.884		0.756585	0.703191	778.458		0.756748	0.709636	772.058
0.766656	0.702843	732.51		0.780739	0.708166	793.529		0.770872	0.709378	786.936		0.76661	0.713216	789.252		0.766553	0.719441	782.717
0.776706	0.712893	741.562		0.790655	0.718082	803.968		0.780959	0.719465	797.955		0.776689	0.723295	800.139		0.776529	0.729417	793.454
0.786681	0.722868	750.639		0.800829	0.728256	814.46		0.790935	0.729441	809.011		0.786751	0.733357	811.018		0.78662	0.739508	804.263
0.796516	0.732703	759.756		0.810853	0.73828	824.997		0.800878	0.739383	820.116		0.796651	0.743257	821.743		0.796659	0.749547	815.107
0.806422	0.742609	768.927		0.820666	0.748093	835.602		0.810639	0.749145	831.267		0.806574	0.753181	832.348		0.806587	0.759475	825.992
0.816544	0.752731	778.132		0.830547	0.757974	846.275		0.820448	0.758954	842.495		0.816684	0.76329	843.048		0.816653	0.769541	836.905
0.826652	0.762839	787.349		0.840564	0.767991	856.969		0.83049	0.768996	853.773		0.826667	0.773273	853.899		0.826808	0.779696	847.825
0.836658	0.772845	796.603		0.8505	0.777927	867.632		0.840564	0.77907	865.045		0.836236	0.782842	864.846		0.836801	0.789689	858.768
0.846714	0.782901	805.919		0.860571	0.787998	878.281		0.850466	0.788972	876.285		0.84565	0.792257	875.875		0.846746	0.799635	869.75
0.856647	0.792834	815.286		0.870802	0.79823	888.945		0.860537	0.799042	887.547		0.855651	0.802257	886.936		0.856638	0.809526	880.775
0.866574	0.802761	824.709		0.880852	0.808279	899.612		0.870884	0.809389	898.845		0.866169	0.812775	897.975		0.866456	0.819344	891.863
0.876688	0.812875	834.195		0.890802	0.818229	910.27		0.880969	0.819475	910.202		0.876468	0.823074	909.044		0.876346	0.829234	903.018
0.886842	0.823029	843.674		0.900816	0.828243	920.909		0.890798	0.829304	921.601		0.886567	0.833173	920.247		0.886476	0.839364	914.199
0.896703	0.832889	853.108		0.910781	0.838208	931.497		0.90067	0.839176	933.035		0.896553	0.843159	931.651		0.89655	0.849438	925.36
0.906627	0.842814	862.541		0.920543	0.84797	941.958		0.910572	0.849078	944.486		0.90643	0.853036	943.242		0.906505	0.859393	936.518
0.916872	0.853059	872.026		0.930303	0.85773	952.327		0.920464	0.85897	955.917		0.916414	0.863021	954.883		0.916718	0.869606	947.729
0.926894	0.863081	881.56		0.940187	0.867614	962.763		0.9305	0.869005	967.319		0.926621	0.873227	966.436		0.926992	0.87988	958.993
0.936654	0.872841	891.142		0.950058	0.877485	973.31		0.940586	0.879091	978.758		0.936623	0.883229	977.901		0.936938	0.889826	970.321
0.946494	0.882681	900.757		0.959886	0.887313	983.899		0.950568	0.889074	990.279		0.946531	0.893137	989.334		0.946732	0.89962	981.724
0.956522	0.892709	910.385		0.96974	0.897167	994.508		0.960644	0.89915	1001.9		0.956767	0.903373	1000.84		0.956656	0.909544	993.17
0.966528	0.902715	919.967		0.97989	0.907317	1005.1		0.970732	0.909238	1013.59		0.966872	0.913478	1012.43		0.966519	0.919407	1004.61
0.97664	0.912827	929.481		0.99039	0.917817	1015.65		0.980728	0.919234	1025.2		0.976653	0.923259	1024.11		0.976465	0.929353	1016.04
0.986828	0.923015	939.002		1.00069	0.928119	1026.23		0.990629	0.929135	1036.62		0.986439	0.933045	1035.84		0.986595	0.939483	1027.49
0.996857	0.933044	948.525		1.01079	0.938221	1036.86		1.00064	0.939142	1047.95		0.99647	0.943076	1047.6		0.996678	0.949566	1039
1.00683	0.943017	958.047		1.02068	0.948103	1047.54		1.01072	0.949223	1059.41		1.00647	0.953076	1059.39		1.00667	0.959559	1050.57
1.01677	0.952958	967.553		1.03049	0.957913	1058.29		1.0206	0.959101	1070.99		1.01654	0.963144	1071.17		1.01677	0.96966	1062.24
1.02669	0.962879	976.788		1.04041	0.967837	1069.02		1.03009	0.968595	1082.68		1.02672	0.973325	1083.02		1.02684	0.979732	1073.99
1.03652	0.972711	984.947		1.05048	0.977906	1079.64		1.03956	0.978068	1094.43		1.03674	0.983348	1094.96		1.03676	0.989651	1085.73
1.04639	0.982577	991.647		1.06048	0.987908	1090.14		1.04977	0.988279	1106.18		1.04677	0.99338	1106.96		1.04662	0.999513	1097.42
1.05641	0.992599	996.948		1.07047	0.997899	1100.57		1.06026	0.998769	1117.89		1.05684	1.00345	1119.02		1.05663	1.00952	1109.16
1.06559	1.00178	1000.91		1.08073	1.00816	1110.97		1.07049	1.009	1129.66		1.06684	1.01344	1131.1		1.06669	1.01958	1120.99
1.07064	1.00683	1003.52		1.09095	1.01838	1121.36		1.08057	1.01908	1141.59		1.07671	1.02331	1143.17		1.07662	1.02951	1132.87
1.07223	1.00842	1004.78		1.10089	1.02832	1131.73		1.09052	1.02903	1153.72		1.08655	1.03315	1155.23		1.08646	1.03934	1144.85
1.07387	1.01006	1003.33		1.11073	1.03816	1142.09		1.10039	1.03889	1166.01		1.09654	1.04315	1167.37		1.09646	1.04934	1156.88
1.0744	1.01058	1000.6		1.12063	1.04806	1152.39		1.11048	1.04899	1178.31		1.10662	1.05323	1179.56		1.10659	1.05948	1168.92
1.0747	1.01089	996.791		1.13048	1.05791	1162.6		1.12066	1.05916	1190.48		1.11664	1.06325	1191.8		1.11663	1.06952	1180.96
1.07487	1.01105	992.678		1.14046	1.06789	1172.71		1.13058	1.06909	1202.54		1.12659	1.07319	1204.07		1.12669	1.07958	1193.07
1.07498	1.01116	988.684		1.15059	1.07802	1182.77		1.14057	1.07907	1214.59		1.13668	1.08329	1216.35		1.13672	1.08961	1205.25
1.07504	1.01122	984.811		1.16057	1.088	1192.78		1.15084	1.08934	1226.71		1.14681	1.09342	1228.61		1.14661	1.0995	1217.5
1.07507	1.01125	981.022		1.17051	1.09794	1202.79		1.16082	1.09933	1238.89		1.15679	1.1034	1240.89		1.15655	1.10943	1229.84
1.07509	1.01128	977.318		1.18064	1.10807	1212.83		1.17056	1.10907	1251.1		1.16673	1.11334	1253.2		1.16673	1.11962	1242.2
1.0751	1.01129	973.719		1.19076	1.11819	1222.86		1.18043	1.11894	1263.33		1.17659	1.1232	1265.54		1.1768	1.12968	1254.51
1.0751	1.01128	970.209		1.20066	1.12809	1232.75		1.19047	1.12898	1275.57		1.18643	1.13304	1277.94		1.18666	1.13955	1266.78
1.0751	1.01129	966.788		1.21055	1.13797	1242.5		1.20047	1.13897	1287.79		1.19637	1.14298	1290.43		1.19672	1.14961	1279.09
1.07509	1.01128	963.46		1.22067	1.1481	1252.21		1.21057	1.14907	1299.97		1.20649	1.1531	1302.91		1.20692	1.15981	1291.48
				1.23083	1.15826	1261.87		1.22073	1.15924	1312.19		1.21651	1.16311	1315.36		1.21674	1.16963	1303.96
				1.24081	1.16824	1271.45		1.23075	1.16926	1324.46		1.2265	1.17311	1327.78		1.22651	1.1794	1316.49
				1.25066	1.17809	1281		1.24082	1.17932	1336.76		1.2368	1.1834	1340.25		1.23649	1.18938	1329.06
				1.26067	1.1881	1290.48		1.25087	1.18937	1349.06		1.24701	1.19361	1352.76		1.24649	1.19938	1341.63
				1.27076	1.19818	1299.79		1.2608	1.19931	1361.34		1.25691	1.20351	1365.34		1.25653	1.20941	1354.16
				1.28071	1.20814	1308.94		1.27065	1.20916	1373.55		1.26672	1.21332	1377.99		1.26668	1.21957	1366.68
				1.29074	1.21816	1318.01		1.28055	1.21905	1385.76		1.27664	1.22325	1390.65		1.27683	1.22972	1379.26
				1.30076	1.22819	1327.01		1.29055	1.22906	1398.01		1.28648	1.23308	1403.28		1.28683	1.23972	1391.9
				1.3106	1.23803	1335.94		1.30062	1.23913	1410.27		1.29646	1.24307	1415.86		1.29683	1.24972	1404.59
				1.32046	1.24789	1344.79		1.3106	1.2491	1422.55		1.30664	1.25325	1428.44		1.30674	1.25963	1417.33
				1.33062	1.25804	1353.53		1.32057	1.25908	1434.83		1.31669	1.26329	1441.05		1.31661	1.2695	1430.05
				1.34072	1.26814	1362.07		1.33071	1.26922	1447.07		1.32668	1.27328	1453.75		1.32642	1.27931	1442.73
				1.35059	1.27802	1370.4		1.34082	1.27933	1459.26		1.3368	1.2834	1466.53		1.33635	1.28923	1455.43
				1.36068	1.28811	1378.62		1.35078	1.28928	1471.45		1.34684	1.29345	1479.36		1.34642	1.29931	1468.21
				1.3709	1.29832	1386.78		1.36071	1.29921	1483.64		1.3567	1.3033	1492.11		1.35656	1.30945	1481.07
				1.38076	1.30818	1394.9		1.37056	1.30907	1495.82		1.36657	1.31317	1504.79		1.36659	1.31947	1493.97
				1.39051	1.31794	1402.92		1.38041	1.31891	1508.02		1.37664	1.32324	1517.52		1.37663	1.32952	1506.89
				1.40048	1.32791	1410.86		1.39039	1.3289	1520.24		1.38671	1.33331	1530.29		1.38686	1.33974	1519.8
				1.41048	1.3379	1418.72		1.4005	1.33901	1532.38		1.39659	1.3432	1543.09		1.39697	1.34986	1532.71
				1.4205	1.34793	1426.46		1.41051	1.34902	1544.42		1.40645	1.35305	1555.96		1.40692	1.3598	1545.64
				1.43065	1.35807	1434.13		1.42058	1.35909	1556.38		1.41649	1.36309	1568.85		1.41677	1.36966	1558.6
				1.44077	1.36819	1441.78		1.43089	1.36939	1568.33		1.42662	1.37322	1581.67		1.42658	1.37947	1571.62
				1.45079	1.37822	1449.44		1.44096	1.37947	1580.27		1.43663	1.38324	1594.48		1.43643	1.38932	1584.74
				1.46086	1.38829	1457.09		1.45084	1.38935	1592.22		1.44672	1.39333	1607.32		1.44651	1.39939	1597.9
				1.47088	1.39831	1464.71		1.46071	1.39921	1604.16		1.45671	1.40332	1620.21		1.45656	1.40945	1611.03
				1.48078	1.40821	1472.28		1.47061	1.40912	1616.04		1.46657	1.41317	1633.14		1.46648	1.41937	1624.17
				1.49061	1.41804	1479.44		1.48048	1.41898	1627.82		1.47656	1.42316	1646.12		1.4766	1.42949	1637.36
				1.50056	1.42799	1485.46		1.49052	1.42902	1639.51		1.48677	1.43338	1659.09		1.48689	1.43978	1650.61
				1.5106	1.43803	1489.92		1.50066	1.43917	1651.16		1.49678	1.44339	1671.97		1.49687	1.44976	1663.92
				1.52063	1.44806	1492.85		1.51065	1.44915	1662.78		1.50664	1.45324	1684.77		1.50674	1.45963	1677.31
				1.52939	1.45681	1494.33		1.52071	1.45922	1674.41		1.51676	1.46337	1697.61		1.51666	1.46955	1690.77
				1.53544	1.46287	1493.04		1.53084	1.46935	1686.08		1.52691	1.47352	1710.49		1.52651	1.47939	1704.23
				1.53627	1.4637	1490.29		1.54083	1.47934	1697.69		1.53672	1.48332	1723.42		1.53638	1.48927	1717.69
				1.537	1.46443	1486.17		1.55066	1.48916	1709.14		1.54647	1.49308	1736.36		1.54649	1.49938	1731.17
				1.5375	1.46492	1480.71		1.56057	1.49907	1720.49		1.55647	1.50307	1749.31		1.55658	1.50946	1744.68
				1.53778	1.4652	1474.28		1.57066	1.50916	1731.81		1.56649	1.5131	1762.22		1.56654	1.51943	1758.26
				1.53792	1.46535	1467.72		1.5807	1.5192	1743.1		1.57655	1.52315	1775.03		1.57664	1.52953	1771.97
				1.53801	1.46544	1461.45		1.59055	1.52906	1754.36		1.5867	1.53331	1787.78		1.58674	1.53963	1785.81
				1.53807	1.4655	1455.48		1.60045	1.53896	1765.61		1.59683	1.54343	1800.54		1.59666	1.54954	1799.66
				1.53809	1.46552	1449.76		1.61053	1.54904	1776.79		1.60685	1.55346	1813.33		1.6065	1.55939	1813.41
				1.53811	1.46554	1444.29		1.62064	1.55914	1787.85		1.61684	1.56344	1826.1		1.61657	1.56945	1827.18
				1.53811	1.46554	1439.08		1.63065	1.56916	1798.83		1.62671	1.57332	1838.84		1.62676	1.57965	1840.99
				1.53811	1.46554	1434.11		1.64076	1.57927	1809.8		1.63656	1.58316	1851.47		1.6368	1.58969	1854.83
				1.53811	1.46554	1429.36		1.65069	1.5892	1820.75		1.64639	1.593	1863.96		1.64668	1.59957	1868.73
				1.5381	1.46553	1424.84		1.66056	1.59906	1831.67		1.65635	1.60296	1876.38		1.65664	1.60953	1882.72
				1.5381	1.46552	1420.52		1.67062	1.60912	1842.58		1.66647	1.61307	1888.78		1.66672	1.61961	1896.68
				1.5381	1.46552	1416.38		1.68082	1.61932	1853.38		1.67657	1.62318	1901.11		1.67672	1.6296	1910.57
				1.53809	1.46552	1412.4		1.69076	1.62927	1864.04		1.68655	1.63316	1913.32		1.68668	1.63957	1924.49
								1.70063	1.63913	1874.57		1.69663	1.64324	1925.3		1.69673	1.64961	1938.48
								1.71083	1.64933	1885.09		1.70687	1.65347	1936.98		1.70664	1.65953	1952.56
								1.72089	1.6594	1895.64		1.71697	1.66358	1948.3		1.71644	1.66933	1966.74
								1.73068	1.66918	1906.15		1.72694	1.67354	1959.02		1.72652	1.67941	1981
								1.74047	1.67898	1916.64		1.73673	1.68334	1968.24		1.73671	1.6896	1995.25
								1.75049	1.68899	1927.09		1.74651	1.69311	1975.15		1.74663	1.69951	2009.42
								1.76051	1.69902	1937.46		1.75641	1.70302	1981.24		1.75659	1.70948	2023.59
								1.77059	1.7091	1947.69		1.76654	1.71314	1987.12		1.76684	1.71973	2037.86
								1.78074	1.71925	1957.86		1.77657	1.72318	1992.97		1.77684	1.72973	2052.24
								1.79082	1.72933	1967.93		1.78651	1.73312	1998.92		1.78659	1.73948	2066.69
								1.80088	1.73939	1977.18		1.7967	1.7433	2005.1		1.79644	1.74933	2081.17
								1.81082	1.74933	1984.82		1.80693	1.75353	2011.57		1.80643	1.75932	2095.66
								1.82067	1.75918	1990.65		1.81686	1.76347	2018.45		1.81643	1.76932	2110.12
								1.83029	1.7688	1994.71		1.82674	1.77335	2026.04		1.82657	1.77945	2124.54
								1.83709	1.77559	1997.05		1.83665	1.78326	2035.22		1.83677	1.78966	2139.01
								1.84073	1.77923	1996.72		1.84647	1.79307	2046.8		1.8468	1.79969	2153.55
								1.84153	1.78004	1994.14		1.85639	1.80299	2059.32		1.85684	1.80973	2168.14
								1.84218	1.78068	1989.97		1.86653	1.81313	2072.11		1.86687	1.81976	2182.78
								1.84257	1.78108	1984.34		1.87657	1.82318	2085.02		1.87684	1.82973	2197.38
								1.84279	1.78129	1977.96		1.88653	1.83314	2098		1.88667	1.83955	2211.88
								1.84292	1.78142	1971.61		1.89668	1.84328	2111.11		1.89653	1.84942	2226.39
								1.843	1.7815	1965.48		1.90676	1.85337	2124.29		1.90659	1.85948	2240.97
								1.84305	1.78156	1959.53		1.91663	1.86324	2137.38		1.9167	1.86959	2255.62
								1.84308	1.78159	1953.73		1.92648	1.87309	2150.32		1.92664	1.87953	2270.3
								1.84309	1.7816	1948.13		1.93658	1.88319	2163.22		1.93657	1.88945	2285
								1.8431	1.78161	1942.72		1.94679	1.8934	2176.09		1.94672	1.89961	2299.7
								1.8431	1.78161	1937.48		1.9568	1.90341	2188.9		1.95685	1.90974	2314.37
								1.8431	1.78161	1932.42		1.96666	1.91327	2201.73		1.96676	1.91965	2329.04
								1.8431	1.78161	1927.52		1.97668	1.92328	2214.57		1.97664	1.92953	2343.74
								1.8431	1.7816	1922.78		1.98675	1.93335	2227.31		1.98649	1.93938	2358.53
								1.84309	1.78159	1918.18		1.99669	1.9433	2239.93		1.99639	1.94928	2373.39
								1.84309	1.78159	1913.73		2.00669	1.9533	2252.53		2.00644	1.95932	2388.3
												2.01673	1.96334	2265.19		2.01653	1.96941	2403.15
												2.02659	1.97319	2277.86		2.02651	1.9794	2417.98
												2.03641	1.98301	2290.59		2.03658	1.98946	2432.83
												2.04658	1.99319	2303.36		2.04687	1.99975	2447.7
												2.05674	2.00335	2316.06		2.0569	2.00979	2462.6
												2.0666	2.0132	2328.63		2.0668	2.01969	2477.56
												2.07663	2.02324	2341.19		2.0767	2.02959	2492.57
												2.08688	2.03349	2353.81		2.08658	2.03946	2507.56
												2.0968	2.04341	2366.49		2.09642	2.04931	2522.48
												2.10655	2.05316	2379.17		2.10653	2.05942	2537.36
												2.11646	2.06307	2391.86		2.11671	2.06959	2552.25
												2.12644	2.07304	2404.52		2.12669	2.07958	2567.12
												2.13644	2.08305	2417.12		2.13676	2.08965	2582.06
												2.1466	2.09321	2429.63		2.14687	2.09976	2597.08
												2.15679	2.10339	2442.14		2.15685	2.10974	2612.11
												2.16683	2.11343	2454.67		2.16664	2.11953	2627.02
												2.17688	2.12349	2467.21		2.17655	2.12943	2641.9
												2.18688	2.13348	2479.75		2.18663	2.13952	2656.83
												2.1968	2.14341	2492.21		2.19662	2.14951	2671.78
												2.20663	2.15324	2504.54		2.20652	2.15941	2686.75
												2.21654	2.16315	2516.83		2.21647	2.16936	2701.78
												2.22662	2.17323	2529.16		2.22656	2.17945	2716.81
												2.2367	2.18331	2541.51		2.23664	2.18952	2731.76
												2.24664	2.19324	2553.88		2.24664	2.19953	2746.68
												2.25659	2.2032	2566.25		2.25674	2.20963	2761.62
												2.26675	2.21336	2578.58		2.26669	2.21958	2776.59
												2.27685	2.22345	2590.86		2.27654	2.22943	2791.57
												2.28674	2.23335	2603.14		2.28657	2.23946	2806.59
												2.29662	2.24323	2615.43		2.29675	2.24964	2821.53
												2.30649	2.2531	2627.77		2.30668	2.25957	2836.32
												2.31641	2.26301	2640.2		2.31657	2.26946	2851.02
												2.32648	2.27309	2652.63		2.3268	2.27969	2865.76
												2.33655	2.28315	2665.01		2.33685	2.28973	2880.52
												2.34652	2.29313	2677.34		2.34659	2.29947	2895.28
												2.35661	2.30322	2689.67		2.35643	2.30931	2910.01
												2.36688	2.31349	2702.01		2.36651	2.31939	2924.68
												2.3769	2.32351	2714.38		2.37655	2.32944	2939.24
												2.38679	2.33339	2726.8		2.38665	2.33953	2953.68
												2.39669	2.34329	2739.26		2.3968	2.34969	2968.11
												2.40656	2.35316	2751.66		2.40683	2.35972	2982.55
												2.41646	2.36307	2763.99		2.4168	2.36968	2996.99
												2.42658	2.37319	2776.28		2.42674	2.37962	3011.4
												2.43671	2.38331	2788.53		2.43668	2.38957	3025.8
												2.44669	2.3933	2800.78		2.44654	2.39942	3040.1
												2.45679	2.4034	2813.09		2.45637	2.40926	3054.33
												2.46689	2.4135	2825.47		2.46634	2.41922	3068.57
												2.47682	2.42343	2837.8		2.47649	2.42938	3082.85
												2.48661	2.43322	2850		2.4866	2.43949	3097.11
												2.49655	2.44316	2862.19		2.49659	2.44948	3111.29
												2.50665	2.45326	2874.4		2.50673	2.45962	3125.36
												2.51664	2.46324	2886.61		2.51695	2.46984	3139.35
												2.52652	2.47313	2898.84		2.52696	2.47985	3153.27
												2.5365	2.48311	2911.12		2.53684	2.48973	3167.1
												2.54659	2.4932	2923.37		2.54663	2.49952	3180.87
												2.55664	2.50325	2935.55		2.55647	2.50936	3194.64
												2.56666	2.51326	2947.72		2.56648	2.51937	3208.41
												2.57675	2.52335	2959.89		2.57657	2.52946	3222.06
												2.58666	2.53327	2971.56		2.58652	2.53941	3235.57
												2.59653	2.54313	2981.67		2.59655	2.54943	3249.03
												2.60663	2.55324	2989.77		2.60682	2.55971	3262.47
												2.61675	2.56336	2995.89		2.61692	2.5698	3275.84
												2.62516	2.57177	3000.07		2.6268	2.57969	3289.17
												2.62918	2.57579	3002.34		2.63671	2.5896	3302.48
												2.63052	2.57713	3002.75		2.64663	2.59952	3315.72
												2.63137	2.57797	3001.33		2.65645	2.60934	3328.84
												2.63208	2.57868	2998.03		2.66646	2.61935	3341.84
												2.63254	2.57915	2992.9		2.67659	2.62948	3354.79
												2.63279	2.5794	2986.51		2.68654	2.63943	3367.69
												2.63293	2.57954	2979.89		2.69655	2.64943	3380.59
												2.63301	2.57961	2973.49		2.70668	2.65957	3393.55
												2.63305	2.57966	2967.29		2.71672	2.66961	3406.47
												2.63309	2.5797	2961.28		2.72659	2.67948	3419.21
												2.6331	2.5797	2955.46		2.73655	2.68944	3431.81
												2.63311	2.57971	2949.84		2.74669	2.69958	3444.37
												2.63311	2.57972	2944.41		2.75682	2.7097	3456.84
												2.63311	2.57971	2939.17		2.76675	2.71964	3469.24
												2.6331	2.57971	2934.1		2.77664	2.72953	3481.62
												2.6331	2.5797	2929.2		2.78669	2.73958	3493.95
												2.63309	2.5797	2924.45		2.79673	2.74962	3506.09
												2.63309	2.5797	2919.84		2.80663	2.75952	3518.1
												2.63308	2.57969	2915.36		2.81666	2.76955	3530.07
												2.63307	2.57968	2911		2.82668	2.77957	3542.03
																2.83654	2.78943	3553.96
																2.84645	2.79934	3565.9
																2.85666	2.80955	3577.76
																2.86671	2.81959	3589.41
																2.87657	2.82946	3600.86
																2.88676	2.83965	3612.25
																2.89694	2.84982	3623.66
																2.90671	2.8596	3635.07
																2.9164	2.86929	3629.72
																2.92638	2.87927	3564.7
																2.93641	2.8893	3496.05
																2.94649	2.89937	3426.19
																2.95667	2.90956	3355.61
																2.96687	2.91975	3284.82
																2.97747	2.93036	3213.98

## Sheet: BH 2
BH 2 (1000 N)				BH 2 (1500 N)				BH 2 (2000 N)				BH 2 (3000 N)				BH 2 (4000 N)				BH 2 (5000 N)				BH 2 (6000 N)
Standard travel	Displacement corrected	Standard force		Standard travel	Displacement corrected	Standard force		Standard travel	Displacement corrected	Standard force		Standard travel	Displacement corrected	Standard force		Standard travel	Displacement corrected	Standard force		Standard travel	Displacement corrected	Standard force		Standard travel	Displacement corrected	Standard force
mm	mm	N		mm	mm	N		mm	mm	N		mm	mm	N		mm	mm	N		mm	mm	N		mm	mm	N
0	-0.0235574	126.828		0	-0.0257813	127.203		0	-0.0310456	120.486		0	-0.0346547	120.949		0	-0.0458721	119.135		0	-0.0623045	117.079		0	-0.0695891	116.973
-1.56641e-06	-0.023559	125.813		-8.15392e-07	-0.0257821	126.117		-3.39031e-06	-0.031049	119.462		-1.53422e-06	-0.0346562	119.844		-1.1276e-05	-0.0458834	118.017		-1.09434e-06	-0.0623056	115.986		4.77433e-06	-0.0695843	115.89
3.11136e-07	-0.0235571	124.754		-3.47614e-06	-0.0257848	125.002		-2.88606e-06	-0.0310485	118.438		-5.86867e-06	-0.0346606	118.838		-6.41584e-06	-0.0458786	116.941		-4.00186e-06	-0.0623085	114.912		-1.81317e-06	-0.0695909	114.839
-1.6737e-06	-0.0235591	123.74		-9.01222e-07	-0.0257822	123.995		-3.81947e-06	-0.0310495	117.375		-4.82798e-06	-0.0346595	117.792		-7.63893e-06	-0.0458798	115.861		-9.2268e-07	-0.0623055	113.989		-6.43731e-08	-0.0695891	113.805
2.81096e-06	-0.0235546	122.677		-2.03848e-07	-0.0257815	122.978		0.000593122	-0.0304525	116.793		-2.67148e-06	-0.0346574	116.726		0.000375338	-0.0454968	115.151		0.000379672	-0.0619249	113.357		0.000144474	-0.0694446	112.994
0.0020472	-0.0215102	123.278		0.0022162	-0.0235651	124.058		0.0023497	-0.0286959	117.829		0.00343887	-0.0312158	118.273		0.00342864	-0.0424435	116.577		0.00342628	-0.0588783	114.607		0.00343492	-0.0661542	114.09
0.00371798	-0.0198394	124.826		0.00377038	-0.0220109	125.534		0.00395975	-0.0270859	119.246		0.00532025	-0.0293344	119.97		0.00531055	-0.0405616	117.915		0.00529542	-0.0570091	115.747		0.00530298	-0.0642861	115.122
0.00467407	-0.0188834	125.873		0.00572931	-0.020052	127.69		0.00595676	-0.0250889	121.338		0.0064159	-0.0282388	121.051		0.00758664	-0.0382855	119.728		0.00758303	-0.0547215	117.266		0.00755025	-0.0620388	116.506
0.00570834	-0.0178491	127.149		0.00684124	-0.0189401	129.014		0.00711829	-0.0239273	122.625		0.00759711	-0.0270576	122.274		0.008873	-0.0369991	120.789		0.0102467	-0.0520578	119.082		0.010186	-0.059403	118.177
0.00683648	-0.0167209	128.603		0.00805972	-0.0177216	130.499		0.00837225	-0.0226734	124.066		0.00888038	-0.0257743	123.62		0.0102555	-0.0356166	121.955		0.0117174	-0.0505871	120.082		0.013252	-0.056337	120.079
0.00807267	-0.0154848	130.213		0.00938362	-0.0163977	132.124		0.00972638	-0.0213193	125.63		0.01025	-0.0244047	125.077		0.0117618	-0.0341104	123.2		0.0132964	-0.0490081	121.138		0.0149445	-0.0546446	121.106
0.00940679	-0.0141506	131.96		0.010812	-0.0149692	133.857		0.0111892	-0.0198565	127.314		0.0117242	-0.0229305	126.635		0.0133805	-0.0324916	124.515		0.0149618	-0.0473427	122.249		0.0167426	-0.0528465	122.176
0.0108323	-0.0127251	133.818		0.0123462	-0.0134351	135.694		0.0127389	-0.0183067	129.096		0.0133037	-0.021351	128.272		0.0150795	-0.0307926	125.902		0.0167361	-0.0455685	123.42		0.0186271	-0.050962	123.288
0.0123473	-0.0112101	135.78		0.0139789	-0.0118024	137.631		0.0143728	-0.0166728	130.975		0.0149592	-0.0196955	129.991		0.0168603	-0.0290118	127.36		0.018614	-0.0436905	124.641		0.0206053	-0.0489838	124.434
0.0139756	-0.00958185	137.85		0.0157271	-0.0100542	139.655		0.0161022	-0.0149434	132.949		0.0167461	-0.0179086	131.801		0.0187371	-0.027135	128.89		0.0206179	-0.0416866	125.91		0.0226874	-0.0469017	125.625
0.0156892	-0.00786823	140.027		0.0175659	-0.00821543	141.771		0.0179386	-0.013107	135.024		0.0186009	-0.0160538	133.695		0.0206968	-0.0251753	130.487		0.0227361	-0.0395685	127.215		0.0248546	-0.0447345	126.856
0.0175041	-0.00605335	142.3		0.0194993	-0.00628202	143.982		0.0198576	-0.011188	137.193		0.0205869	-0.0140678	135.675		0.0227556	-0.0231166	132.148		0.0249441	-0.0373604	128.563		0.0271274	-0.0424617	128.119
0.0194218	-0.0041356	144.679		0.0215008	-0.00428048	146.291		0.0218626	-0.00918304	139.454		0.022692	-0.0119627	137.74		0.0249062	-0.0209659	133.874		0.0272673	-0.0350372	129.946		0.0294899	-0.0400992	129.419
0.0214395	-0.00211792	147.166		0.0235918	-0.00218951	148.708		0.023981	-0.00706465	141.818		0.0248894	-0.00976527	139.889		0.0271747	-0.0186975	135.661		0.0296528	-0.0326518	131.367		0.0319617	-0.0376274	130.76
0.0235574	0	149.759		0.0257813	0	151.221		0.0262335	-0.00481215	144.278		0.0271852	-0.00746953	142.119		0.0295536	-0.0163186	137.495		0.0321363	-0.0301683	132.827		0.0345717	-0.0350174	132.139
0.0257871	0.00222969	152.458		0.0280843	0.00230302	153.824		0.0286056	-0.00244007	146.843		0.0295882	-0.00506649	144.432		0.0320515	-0.0138207	139.388		0.0347119	-0.0275927	134.327		0.0372853	-0.0323038	133.558
0.0281192	0.00456176	155.275		0.0305071	0.00472583	156.526		0.0310456	0	149.506		0.0320833	-0.0025714	146.825		0.034661	-0.0112112	141.348		0.0373623	-0.0249422	135.854		0.0401013	-0.0294878	135.016
0.0305492	0.00699177	158.201		0.0330481	0.00726676	159.341		0.0335845	0.00253882	152.278		0.0346547	0	149.308		0.0373444	-0.0085277	143.371		0.0401259	-0.0221787	137.413		0.0430211	-0.026568	136.517
0.0330743	0.00951685	161.237		0.0356816	0.00990029	162.267		0.036208	0.00516235	155.155		0.0373082	0.00265351	151.882		0.0401012	-0.00577098	145.466		0.0429965	-0.0193081	139.003		0.0460225	-0.0235666	138.062
0.0357061	0.0121486	164.387		0.0384011	0.0126198	165.315		0.0389217	0.00787607	158.132		0.0400585	0.0054038	154.538		0.0429363	-0.00293588	147.636		0.0459826	-0.016322	140.632		0.0490573	-0.0205318	139.638
0.0384298	0.0148723	167.654		0.0412023	0.015421	168.489		0.0417246	0.0106789	161.195		0.0429177	0.008263	157.284		0.0458721	0	149.881		0.0490686	-0.0132359	142.312		0.0521988	-0.0173903	141.249
0.0412372	0.0176797	171.036		0.0440964	0.0183151	171.778		0.0446615	0.0136159	164.356		0.0458995	0.0112448	160.128		0.0489375	0.00306539	152.192		0.0522368	-0.0100678	144.043		0.0554802	-0.0141089	142.898
0.0441213	0.0205639	174.528		0.0471017	0.0213204	175.174		0.0477282	0.0166826	167.605		0.0489943	0.0143396	163.074		0.0521171	0.00624499	154.576		0.0554938	-0.00681075	145.833		0.0588909	-0.0106982	144.583
0.0471258	0.0235683	178.114		0.0502449	0.0244636	178.67		0.0508804	0.0198347	170.951		0.0521725	0.0175178	166.128		0.0554212	0.00954905	157.049		0.0588526	-0.00345194	147.675		0.0623708	-0.00721831	146.308
0.0502889	0.0267315	181.783		0.053515	0.0277337	182.268		0.0540794	0.0230338	174.412		0.055424	0.0207693	169.281		0.0587898	0.0129177	159.608		0.0623045	0	149.569		0.0659395	-0.00364956	148.086
0.0535659	0.0300085	185.54		0.056885	0.0311037	185.982		0.0573857	0.0263401	177.981		0.0587828	0.0241281	172.513		0.062233	0.0163609	162.245		0.0658719	0.00356739	151.514		0.0695891	0	149.9
0.0569126	0.0333552	189.399		0.0603266	0.0345453	189.825		0.0608204	0.0297748	181.641		0.0623065	0.0276518	175.81		0.0657996	0.0199275	164.956		0.0695577	0.00725314	153.522		0.0733835	0.00379443	151.755
0.0602983	0.0367409	193.37		0.0638197	0.0380384	193.786		0.0643759	0.0333303	185.388		0.0659741	0.0313194	179.193		0.0695156	0.0236434	167.744		0.0733101	0.0110055	155.587		0.0773315	0.00774246	153.65
0.0637511	0.0401936	197.448		0.0673777	0.0415964	197.854		0.0680553	0.0370097	189.225		0.0696935	0.0350388	182.669		0.0733576	0.0274855	170.608		0.0771585	0.014854	157.702		0.0813734	0.0117843	155.591
0.0673316	0.0437742	201.626		0.0710576	0.0452763	202.032		0.071849	0.0408033	193.164		0.073439	0.0387843	186.229		0.0772595	0.0313873	173.549		0.0811487	0.0188442	159.867		0.0854159	0.0158268	157.575
0.0710542	0.0474968	205.91		0.0749036	0.0491223	206.322		0.0756943	0.0446487	197.216		0.0772447	0.04259	189.878		0.0812057	0.0353336	176.576		0.0852726	0.022968	162.082		0.0895118	0.0199227	159.612
0.0748886	0.0513312	210.313		0.0788272	0.0530459	210.726		0.07958	0.0485344	201.369		0.0811853	0.0465306	193.612		0.0852523	0.0393802	179.703		0.089487	0.0271825	164.353		0.0937457	0.0241567	161.705
0.0788005	0.0552431	214.83		0.082798	0.0570167	215.248		0.0835867	0.0525411	205.644		0.0852841	0.0506294	197.438		0.08942	0.0435479	182.925		0.0937326	0.0314281	166.677		0.098118	0.0285289	163.858
0.0827982	0.0592408	219.465		0.0868495	0.0610682	219.895		0.0877473	0.0567017	210.038		0.0894793	0.0548246	201.353		0.0937118	0.0478397	186.24		0.098031	0.0357264	169.056		0.102549	0.03296	166.055
0.0869561	0.0633987	224.247		0.0910765	0.0652952	224.673		0.0920029	0.0609572	214.55		0.0936842	0.0590295	205.37		0.0981171	0.0522449	189.648		0.102451	0.0401469	171.502		0.107022	0.0374327	168.29
0.0912493	0.0676919	229.187		0.0954277	0.0696464	229.594		0.0962989	0.0652533	219.155		0.0979862	0.0633315	209.496		0.102622	0.0567501	193.157		0.10704	0.0447357	174.009		0.111641	0.0420515	170.583
0.0955953	0.0720379	234.277		0.0998203	0.074039	234.646		0.100729	0.0696836	223.853		0.102471	0.0678159	213.758		0.107247	0.0613751	196.768		0.111701	0.0493966	176.566		0.116439	0.0468495	172.927
0.0999458	0.0763884	239.491		0.104302	0.0785203	239.806		0.105373	0.0743278	228.677		0.107066	0.072411	218.16		0.111997	0.0661245	200.509		0.116471	0.0541665	179.184		0.121318	0.0517292	175.311
0.104402	0.0808445	244.819		0.108936	0.0831543	245.103		0.110122	0.0790766	233.619		0.111725	0.07707	222.686		0.116784	0.0709117	204.364		0.12143	0.0591256	181.874		0.126287	0.056698	177.735
0.109026	0.0854688	250.283		0.113728	0.0879467	250.545		0.114828	0.0837824	238.676		0.116484	0.0818294	227.335		0.12157	0.0756981	208.326		0.126543	0.0642382	184.629		0.131398	0.0618089	180.203
0.113772	0.0902145	255.868		0.118608	0.0928268	256.125		0.119565	0.0885195	243.847		0.121401	0.0867463	232.101		0.126449	0.0805771	212.389		0.13163	0.0693254	187.444		0.136645	0.0670555	182.714
0.118539	0.0949816	261.561		0.123479	0.0976976	261.857		0.124458	0.0934128	249.147		0.126475	0.0918206	236.981		0.131536	0.0856639	216.556		0.136717	0.0744126	190.311		0.141966	0.0723765	185.264
0.123375	0.0998181	267.388		0.128442	0.102661	267.768		0.129504	0.0984583	254.561		0.131615	0.0969603	241.969		0.136714	0.0908414	220.823		0.141987	0.0796829	193.231		0.147338	0.0777494	187.851
0.128392	0.104834	273.383		0.133585	0.107804	273.853		0.134605	0.10356	260.077		0.136779	0.102124	247.079		0.141892	0.0960195	225.205		0.147394	0.085089	196.203		0.152842	0.0832528	190.479
0.133524	0.109967	279.504		0.138787	0.113006	280.052		0.139767	0.108722	265.715		0.142028	0.107373	252.325		0.147225	0.101352	229.73		0.152836	0.0905311	199.22		0.158462	0.0888727	193.15
0.138702	0.115144	285.702		0.144086	0.118304	286.347		0.145093	0.114048	271.525		0.147394	0.112739	257.697		0.15269	0.106818	234.38		0.158397	0.096092	202.294		0.164201	0.0946115	195.855
0.14403	0.120472	291.996		0.149599	0.123818	292.768		0.150533	0.119487	277.507		0.152847	0.118193	263.177		0.158215	0.112342	239.144		0.164095	0.101791	205.426		0.170062	0.100473	198.617
0.149563	0.126006	298.431		0.155228	0.129447	299.341		0.156017	0.124972	283.62		0.15848	0.123825	268.745		0.163892	0.11802	244.003		0.169887	0.107582	208.602		0.176047	0.106458	201.427
0.15516	0.131602	305.017		0.160802	0.135021	306.052		0.161674	0.130628	289.861		0.164265	0.12961	274.396		0.169811	0.123939	248.984		0.175768	0.113464	211.841		0.182019	0.11243	204.276
0.160721	0.137163	311.77		0.166409	0.140627	312.898		0.167528	0.136482	296.222		0.170065	0.135411	280.147		0.175802	0.12993	254.116		0.181836	0.119532	215.155		0.188004	0.118415	207.172
0.166387	0.142829	318.677		0.172185	0.146404	319.873		0.173459	0.142413	302.714		0.175883	0.141228	286.024		0.181726	0.135854	259.406		0.188012	0.125707	218.556		0.194163	0.124573	210.116
0.17219	0.148632	325.697		0.178074	0.152292	326.969		0.179399	0.148353	309.306		0.181807	0.147153	292.028		0.187762	0.14189	264.831		0.194091	0.131787	222.051		0.200428	0.130839	213.116
0.178091	0.154534	332.814		0.18405	0.158268	334.205		0.185405	0.154359	315.997		0.187816	0.153161	298.146		0.193917	0.148044	270.36		0.200285	0.13798	225.621		0.206697	0.137108	216.17
0.184196	0.160638	340.037		0.190172	0.16439	341.599		0.191488	0.160442	322.778		0.193905	0.159251	304.355		0.200228	0.154356	275.982		0.206648	0.144344	229.267		0.213061	0.143472	219.277
0.190453	0.166896	347.372		0.196358	0.170577	349.171		0.197768	0.166723	329.617		0.20017	0.165515	310.641		0.206794	0.160922	281.677		0.213121	0.150817	232.994		0.21957	0.14998	222.419
0.196641	0.173084	354.865		0.202619	0.176837	356.897		0.204253	0.173207	336.512		0.206581	0.171927	317.029		0.213423	0.167551	287.462		0.219802	0.157498	236.817		0.226208	0.156619	225.616
0.202816	0.179258	362.499		0.209109	0.183328	364.753		0.210705	0.17966	343.491		0.213071	0.178417	323.531		0.219925	0.174053	293.336		0.226503	0.164199	240.754		0.233107	0.163518	228.869
0.209174	0.185616	370.26		0.215765	0.189984	372.773		0.217162	0.186116	350.572		0.219663	0.185008	330.143		0.226508	0.180636	299.293		0.233145	0.17084	244.804		0.240031	0.170442	232.2
0.215614	0.192056	378.171		0.222431	0.196649	380.961		0.223745	0.192699	357.77		0.226366	0.191711	336.889		0.233217	0.187345	305.334		0.239954	0.177649	248.962		0.246925	0.177336	235.599
0.22219	0.198632	386.229		0.229119	0.203337	389.282		0.230405	0.19936	365.079		0.233126	0.198472	343.764		0.239987	0.194115	311.444		0.246907	0.184602	253.244		0.253902	0.184313	239.051
0.228924	0.205367	394.432		0.23588	0.210099	397.732		0.23715	0.206105	372.477		0.240018	0.205364	350.735		0.246962	0.20109	317.616		0.253973	0.191668	257.652		0.261118	0.191528	242.55
0.235688	0.21213	402.789		0.242864	0.217083	406.315		0.24409	0.213044	379.985		0.24705	0.212396	357.833		0.25398	0.208108	323.857		0.261135	0.198831	262.187		0.268647	0.199058	246.104
0.242631	0.219074	411.312		0.250052	0.224271	415		0.251178	0.220132	387.62		0.254218	0.219563	365.046		0.2611	0.215228	330.188		0.26836	0.206056	266.853		0.276194	0.206605	249.715
0.249777	0.22622	420.006		0.257145	0.231363	423.787		0.25837	0.227324	395.41		0.261428	0.226773	372.378		0.268412	0.22254	336.623		0.275816	0.213511	271.67		0.283601	0.214012	253.384
0.256977	0.233419	428.869		0.264264	0.238483	432.714		0.265604	0.234559	403.362		0.268625	0.233971	379.822		0.275854	0.229982	343.166		0.283457	0.221152	276.633		0.291058	0.221469	257.139
0.264227	0.240669	437.871		0.271479	0.245698	441.788		0.272914	0.241868	411.449		0.275934	0.241279	387.382		0.283366	0.237494	349.809		0.291104	0.228799	281.721		0.298624	0.229035	260.978
0.271529	0.247971	447.028		0.278767	0.252986	450.993		0.280348	0.249302	419.669		0.283395	0.24874	395.099		0.290925	0.245052	356.582		0.298775	0.23647	286.92		0.306382	0.236793	264.889
0.27902	0.255463	456.343		0.286265	0.260483	460.292		0.287961	0.256915	428.039		0.290866	0.256211	402.949		0.298657	0.252785	363.476		0.306516	0.244211	292.241		0.314219	0.244629	268.861
0.286631	0.263073	465.819		0.29395	0.268169	469.684		0.295715	0.264669	436.527		0.298433	0.263778	410.906		0.306541	0.260669	370.487		0.314465	0.252161	297.675		0.322131	0.252542	272.928
0.294197	0.27064	475.466		0.301734	0.275953	479.176		0.303482	0.272436	445.138		0.306119	0.271464	418.996		0.314457	0.268585	377.628		0.322465	0.260161	303.217		0.330231	0.260642	277.111
0.301848	0.27829	485.31		0.309567	0.283786	488.808		0.311209	0.280163	453.895		0.314089	0.279434	427.264		0.322436	0.276564	384.89		0.330466	0.268161	308.867		0.338456	0.268867	281.412
0.309555	0.285998	495.378		0.317437	0.291655	498.571		0.319091	0.288045	462.829		0.322241	0.287586	435.705		0.330452	0.28458	392.287		0.338506	0.276201	314.638		0.346735	0.277145	285.815
0.317384	0.293827	505.661		0.325446	0.299665	508.456		0.32707	0.296024	471.936		0.330293	0.295639	444.275		0.338533	0.292661	399.813		0.34659	0.284285	320.515		0.35507	0.285481	290.332
0.32538	0.301823	516.158		0.333663	0.307881	518.461		0.335094	0.304048	481.176		0.338389	0.303735	452.986		0.346798	0.300926	407.483		0.354901	0.292596	326.513		0.363647	0.294058	295.001
0.333541	0.309983	526.911		0.34199	0.316209	528.546		0.343209	0.312164	490.574		0.346764	0.312109	461.858		0.355191	0.309319	415.301		0.36342	0.301116	332.644		0.372291	0.302702	299.814
0.341826	0.318269	537.969		0.350297	0.324516	538.74		0.351545	0.320499	500.167		0.355443	0.320788	470.897		0.36367	0.317798	423.297		0.372086	0.309782	338.906		0.380944	0.311355	304.777
0.35013	0.326572	549.306		0.358608	0.332827	549.115		0.360159	0.329113	509.962		0.363997	0.329343	480.052		0.372132	0.32626	431.463		0.380806	0.318501	345.306		0.389674	0.320085	309.879
0.358499	0.334941	560.913		0.367106	0.341325	559.72		0.368747	0.337701	519.889		0.372425	0.33777	489.38		0.380657	0.334785	439.811		0.389594	0.32729	351.87		0.398502	0.328913	315.134
0.367063	0.343505	572.767		0.375617	0.349836	570.564		0.377316	0.34627	529.949		0.380917	0.346262	498.903		0.389444	0.343572	448.301		0.398607	0.336302	358.571		0.407522	0.337933	320.55
0.375814	0.352257	584.819		0.384195	0.358413	581.714		0.386099	0.355054	540.154		0.389661	0.355007	508.593		0.398472	0.352599	456.918		0.407766	0.345461	365.387		0.416712	0.347123	326.159
0.384607	0.36105	597.097		0.392937	0.367155	593.223		0.395233	0.364187	550.517		0.398477	0.363822	518.403		0.40752	0.361648	465.683		0.416876	0.354572	372.29		0.42594	0.356351	331.99
0.393315	0.369757	609.639		0.401998	0.376216	605.158		0.404271	0.373226	561.006		0.40737	0.372715	528.321		0.416637	0.370764	474.621		0.426018	0.363714	379.329		0.43511	0.365521	338.06
0.402113	0.378556	622.465		0.411079	0.385298	617.463		0.413184	0.382138	571.647		0.416481	0.381827	538.416		0.425828	0.379955	483.745		0.435326	0.373021	386.531		0.4444	0.374811	344.361
0.411005	0.387448	635.527		0.420138	0.394356	630.117		0.422116	0.391071	582.475		0.425747	0.391093	548.685		0.435027	0.389155	493.012		0.444559	0.382254	393.862		0.453942	0.384353	350.868
0.420052	0.396495	648.838		0.429398	0.403617	643.183		0.431295	0.400249	593.45		0.435043	0.400388	559.108		0.444371	0.398499	502.456		0.453782	0.391478	401.337		0.463619	0.39403	357.589
0.429238	0.405681	662.429		0.439043	0.413262	656.681		0.440563	0.409518	604.546		0.444489	0.409834	569.693		0.453983	0.408111	512.059		0.463287	0.400982	408.989		0.473305	0.403716	364.541
0.438689	0.415131	676.278		0.448583	0.422802	670.588		0.449962	0.418916	615.757		0.45407	0.419415	580.456		0.463675	0.417803	521.758		0.473122	0.410818	416.782		0.483041	0.413452	371.717
0.448123	0.424565	690.335		0.457939	0.432157	684.916		0.459552	0.428507	627.131		0.463678	0.429023	591.343		0.473231	0.427359	531.546		0.482868	0.420563	424.665		0.492796	0.423207	379.131
0.457594	0.434037	704.583		0.467347	0.441566	699.641		0.469247	0.438201	638.677		0.473305	0.43865	602.324		0.482931	0.437059	541.455		0.492599	0.430294	432.643		0.502616	0.433027	386.801
0.467365	0.443807	719.047		0.477005	0.451224	714.68		0.479018	0.447972	650.406		0.482979	0.448325	613.384		0.492986	0.447114	551.486		0.502783	0.440479	440.727		0.512597	0.443008	394.689
0.47734	0.453782	733.691		0.48673	0.460949	729.932		0.488975	0.457929	662.345		0.492821	0.458166	624.564		0.502909	0.457036	561.625		0.513046	0.450741	448.942		0.522697	0.453108	402.727
0.487122	0.463564	748.516		0.496627	0.470846	745.347		0.498973	0.467927	674.489		0.502796	0.468141	635.873		0.512665	0.466793	571.868		0.522954	0.46065	457.245		0.532644	0.463055	410.888
0.496865	0.473308	763.528		0.506691	0.480909	760.961		0.508925	0.47788	686.801		0.512697	0.478043	647.299		0.522558	0.476686	582.207		0.532743	0.470438	465.634		0.542602	0.473013	419.176
0.506724	0.483167	778.695		0.516713	0.490931	776.764		0.518778	0.487733	699.282		0.522494	0.487839	658.835		0.53257	0.486698	592.609		0.542655	0.480351	474.108		0.552811	0.483222	427.604
0.516592	0.493035	793.934		0.526715	0.500934	792.744		0.528702	0.497656	712.002		0.532441	0.497787	670.435		0.542505	0.496633	603.008		0.552543	0.490239	482.616		0.562867	0.493278	436.171
0.526525	0.502967	809.19		0.536777	0.510996	808.875		0.538724	0.507678	725.01		0.542574	0.50792	682.077		0.5526	0.506728	613.425		0.5625	0.500196	491.15		0.5727	0.503111	444.871
0.536626	0.513069	824.489		0.546846	0.521065	825.077		0.548695	0.517649	738.33		0.552644	0.517989	693.765		0.562821	0.516948	623.884		0.572588	0.510284	499.734		0.582542	0.512953	453.707
0.546716	0.523159	839.83		0.556796	0.531015	841.264		0.558523	0.527477	751.991		0.562722	0.528068	705.522		0.572859	0.526987	634.377		0.582609	0.520305	508.401		0.592528	0.522939	462.62
0.556695	0.533137	855.218		0.566666	0.540884	857.422		0.56842	0.537375	765.955		0.572707	0.538052	717.334		0.582841	0.536969	644.941		0.592607	0.530303	517.209		0.602484	0.532894	471.576
0.566766	0.543208	870.676		0.576661	0.55088	873.591		0.57852	0.547474	780.189		0.582617	0.547962	729.236		0.592845	0.546973	655.58		0.602692	0.540387	526.18		0.612552	0.542963	480.559
0.576865	0.553308	886.18		0.586693	0.560911	889.763		0.588609	0.557564	794.649		0.592634	0.557979	741.218		0.602777	0.556905	666.288		0.612729	0.550424	535.307		0.622731	0.553142	489.539
0.586833	0.563276	901.644		0.596612	0.570831	905.87		0.598666	0.56762	809.376		0.602805	0.568151	753.211		0.612524	0.566652	676.994		0.622645	0.560341	544.558		0.632705	0.563116	498.484
0.596673	0.573115	917.028		0.606427	0.580646	921.954		0.60873	0.577684	824.333		0.612755	0.578101	765.18		0.622337	0.576465	687.747		0.632555	0.57025	553.941		0.64269	0.573101	507.473
0.606628	0.58307	932.411		0.616367	0.590586	938.022		0.618647	0.587602	839.517		0.622637	0.587982	777.157		0.63241	0.586538	698.599		0.642647	0.580342	563.517		0.652765	0.583176	516.601
0.616691	0.593133	947.843		0.626325	0.600543	954.121		0.628597	0.597551	854.913		0.63276	0.598105	789.219		0.642555	0.596682	709.574		0.65281	0.590506	573.322		0.662558	0.592969	525.855
0.626649	0.603091	962.984		0.636082	0.610301	970.277		0.63874	0.607694	870.451		0.642858	0.608203	801.377		0.652575	0.606703	720.732		0.662804	0.6005	583.358		0.671968	0.602379	535.142
0.636492	0.612935	976.872		0.645846	0.620064	986.513		0.648807	0.617761	886.01		0.652669	0.618015	813.773		0.66257	0.616698	732.091		0.672651	0.610347	593.633		0.681403	0.611813	544.456
0.646462	0.622905	989.024		0.655762	0.629981	1002.79		0.658675	0.62763	901.56		0.662514	0.62786	826.466		0.672755	0.626883	743.654		0.682638	0.620333	604.098		0.691597	0.622008	553.839
0.656563	0.633005	999.337		0.665825	0.640044	1019.14		0.668669	0.637623	917.19		0.672527	0.637872	839.451		0.682935	0.637063	755.355		0.692768	0.630464	614.706		0.702224	0.632635	563.318
0.665749	0.642192	1007.87		0.676105	0.650323	1035.59		0.678852	0.647807	932.918		0.682501	0.647846	852.69		0.692926	0.647054	767.271		0.702796	0.640491	625.459		0.712487	0.642898	572.879
0.670923	0.647366	1014.61		0.686504	0.660722	1052.08		0.688763	0.657717	948.769		0.692539	0.657885	866.235		0.702932	0.65706	779.434		0.712775	0.650471	636.372		0.72245	0.652861	582.582
0.672674	0.649117	1019.56		0.69658	0.670799	1068.58		0.698558	0.667512	964.743		0.702777	0.668123	880.153		0.712801	0.666929	791.874		0.722705	0.6604	647.456		0.732551	0.662962	592.443
0.673602	0.650044	1022.77		0.706496	0.680714	1085.08		0.708486	0.677441	980.813		0.712896	0.678242	894.463		0.722531	0.676659	804.614		0.732556	0.670251	658.718		0.742759	0.67317	602.378
0.674473	0.650915	1024.13		0.716668	0.690887	1101.62		0.718491	0.687446	996.921		0.722799	0.688144	909.188		0.732415	0.686543	817.706		0.742481	0.680176	670.147		0.752756	0.683166	612.301
0.675457	0.651899	1021.74		0.726838	0.701057	1118.11		0.728497	0.697451	1013.11		0.732809	0.698154	924.37		0.742574	0.696702	831.115		0.752619	0.690314	681.666		0.762666	0.693077	622.227
0.675646	0.652089	1019.25		0.736656	0.710875	1134.58		0.738689	0.707643	1029.49		0.742799	0.708144	939.995		0.752588	0.706716	844.719		0.762627	0.700322	693.222		0.772547	0.702958	632.234
0.675765	0.652207	1016.78		0.746457	0.720675	1151.02		0.748875	0.71783	1046.07		0.752626	0.717972	955.863		0.762496	0.716624	858.564		0.772552	0.710247	704.83		0.782429	0.71284	642.385
0.675838	0.652281	1014.39		0.756478	0.730697	1167.44		0.758823	0.727777	1062.84		0.762383	0.727728	971.918		0.77273	0.726858	872.659		0.782689	0.720385	716.573		0.792391	0.722801	652.71
0.675883	0.652326	1012.02		0.766483	0.740702	1183.77		0.768799	0.737754	1079.87		0.772366	0.737712	988.247		0.782943	0.737071	887.05		0.792844	0.730539	728.45		0.802535	0.732946	663.132
0.675907	0.65235	1009.68		0.776548	0.750767	1200		0.778807	0.747761	1097.16		0.782493	0.747838	1004.88		0.792847	0.746974	901.734		0.802719	0.740415	740.512		0.812549	0.74296	673.657
0.67592	0.652362	1007.42		0.786745	0.760963	1216.19		0.788719	0.757673	1114.61		0.792559	0.757904	1021.71		0.802674	0.756802	916.687		0.812597	0.750293	752.742		0.822545	0.752956	684.296
0.675925	0.652368	1005.23		0.796875	0.771094	1232.41		0.798459	0.767413	1132.15		0.802519	0.767865	1038.74		0.812613	0.766741	931.884		0.822554	0.760249	765.095		0.832803	0.763214	695.085
0.675923	0.652366	1003.12		0.806864	0.781083	1248.65		0.808338	0.777293	1149.88		0.81265	0.777995	1055.92		0.82249	0.776618	947.296		0.832472	0.770168	777.546		0.842995	0.773406	706.025
0.675924	0.652367	1001.09		0.816812	0.791031	1264.91		0.818449	0.787404	1167.88		0.822897	0.788242	1073.15		0.832479	0.786607	962.86		0.842482	0.780178	790.078		0.852914	0.783325	717.152
0.675919	0.652361	999.121		0.826721	0.800939	1281.18		0.828545	0.797499	1186.03		0.832942	0.798288	1090.43		0.842576	0.796704	978.6		0.852667	0.790362	802.73		0.862741	0.793152	728.453
0.675915	0.652358	997.226		0.836585	0.810804	1297.36		0.838539	0.807493	1204.23		0.842915	0.80826	1107.82		0.852582	0.80671	994.575		0.862749	0.800445	815.401		0.872675	0.803086	739.883
0.675909	0.652351	995.386		0.846401	0.82062	1313.46		0.848587	0.817541	1222.55		0.852852	0.818197	1125.32		0.86258	0.816708	1010.79		0.872694	0.810389	828.17		0.882507	0.812918	751.398
0.675904	0.652347	993.607		0.856351	0.83057	1329.58		0.858824	0.827779	1240.89		0.862621	0.827967	1142.95		0.872666	0.826794	1027.25		0.882765	0.82046	841.187		0.89248	0.822891	762.973
0.675902	0.652345	991.879		0.866445	0.840664	1345.76		0.868952	0.837907	1259.14		0.872425	0.837771	1160.74		0.882674	0.836802	1043.92		0.892635	0.83033	854.547		0.902625	0.833036	774.646
0.675896	0.652339	990.198		0.876542	0.85076	1361.99		0.878906	0.84786	1277.31		0.882526	0.847871	1178.64		0.892628	0.846756	1060.65		0.902125	0.839821	868.074		0.912678	0.843089	786.402
0.675888	0.65233	988.566		0.886536	0.860755	1378.23		0.88888	0.857834	1295.42		0.892572	0.857917	1196.6		0.902587	0.856715	1077.45		0.911463	0.849158	881.714		0.922683	0.853094	798.292
0.675884	0.652326	986.973		0.896611	0.87083	1394.43		0.898717	0.867671	1313.46		0.90247	0.867815	1214.6		0.912649	0.866777	1094.41		0.9214	0.859096	895.569		0.932849	0.863259	810.331
0.675876	0.652319	985.43		0.906852	0.881071	1410.54		0.908454	0.877408	1331.47		0.912605	0.87795	1232.73		0.922786	0.876914	1111.55		0.931972	0.869667	909.674		0.942934	0.873345	822.484
0.675875	0.652317	983.916		0.916932	0.89115	1426.58		0.918314	0.887268	1349.52		0.922903	0.888249	1251.03		0.932777	0.886905	1128.89		0.942425	0.880121	923.997		0.952791	0.883202	834.647
0.67587	0.652313	982.439		0.926902	0.901121	1442.59		0.928215	0.897169	1367.64		0.932901	0.898247	1269.51		0.942624	0.896752	1146.42		0.952433	0.890128	938.536		0.962637	0.893048	846.847
				0.93676	0.910979	1458.27		0.937886	0.906841	1385.81		0.942729	0.908074	1288.14		0.952634	0.906762	1164.07		0.962467	0.900162	953.382		0.972689	0.9031	859.154
				0.946573	0.920792	1472.61		0.947666	0.91662	1404		0.952647	0.917992	1306.89		0.962753	0.916881	1181.77		0.972672	0.910368	968.422		0.982719	0.91313	871.579
				0.956467	0.930686	1484.83		0.957877	0.926831	1422.26		0.96255	0.927896	1325.72		0.972727	0.926855	1199.58		0.982785	0.92048	983.517		0.992592	0.923003	884.121
				0.966547	0.940766	1494.84		0.968102	0.937057	1440.62		0.972459	0.937804	1344.62		0.982739	0.936867	1217.53		0.992731	0.930426	998.606		1.00242	0.932831	896.784
				0.975864	0.950083	1502.73		0.978296	0.94725	1459.16		0.982541	0.947887	1363.58		0.992685	0.946813	1235.66		1.0026	0.940297	1013.76		1.01247	0.942877	909.543
				0.981363	0.955581	1508.51		0.98844	0.957394	1477.84		0.992581	0.957927	1382.66		1.00253	0.95666	1253.98		1.01246	0.950155	1029.06		1.0226	0.953013	922.327
				0.983196	0.957415	1512.27		0.99843	0.967384	1496.63		1.00253	0.967878	1401.91		1.01246	0.966588	1272.52		1.02238	0.960071	1044.53		1.03263	0.96304	935.153
				0.984057	0.958275	1514.02		1.00833	0.977288	1515.47		1.01262	0.97797	1421.35		1.02263	0.976762	1291.16		1.03249	0.970186	1060.09		1.0427	0.973114	948.074
				0.985363	0.959582	1511.39		1.01844	0.987392	1534.29		1.02271	0.988052	1440.94		1.03265	0.98678	1309.79		1.04256	0.980252	1075.68		1.05272	0.983131	961.088
				0.985685	0.959904	1507.36		1.02855	0.997507	1553.04		1.03267	0.998015	1460.55		1.04253	0.996661	1328.46		1.05251	0.990209	1091.31		1.06262	0.993029	974.205
				0.985873	0.960092	1502.65		1.03848	1.00743	1571.68		1.04258	1.00793	1480.13		1.05268	1.0068	1347.24		1.06269	1.00038	1107.05		1.07259	1.003	987.441
				0.98598	0.960199	1498.04		1.0485	1.01745	1590.35		1.05261	1.01795	1499.77		1.06284	1.01697	1366.16		1.07296	1.01065	1122.9		1.08276	1.01317	1000.71
				0.986051	0.96027	1493.6		1.05867	1.02762	1609.12		1.06273	1.02808	1519.53		1.07271	1.02684	1385.24		1.08294	1.02063	1138.89		1.09274	1.02315	1013.93
				0.986087	0.960306	1489.28		1.06868	1.03764	1627.84		1.07278	1.03813	1539.36		1.08256	1.03669	1404.46		1.09278	1.03048	1155.02		1.10259	1.033	1027.14
								1.07855	1.04751	1646.36		1.08265	1.048	1559.32		1.09254	1.04667	1423.76		1.10269	1.04038	1171.25		1.11273	1.04314	1040.46
								1.08853	1.05749	1664.78		1.09261	1.05796	1579.35		1.10246	1.05659	1443.09		1.11254	1.05024	1187.53		1.12292	1.05333	1053.91
								1.09871	1.06767	1683.2		1.10272	1.06806	1599.36		1.11249	1.06662	1462.35		1.12247	1.06016	1203.83		1.13272	1.06313	1067.5
								1.10881	1.07777	1701.58		1.11274	1.07809	1619.32		1.12265	1.07678	1481.52		1.1326	1.0703	1220.18		1.14249	1.0729	1081.21
								1.11869	1.08764	1719.89		1.12272	1.08806	1639.35		1.13272	1.08685	1500.56		1.14266	1.08036	1236.59		1.1525	1.08291	1095
								1.1286	1.09756	1738.21		1.13272	1.09806	1659.46		1.14268	1.09681	1519.51		1.15262	1.09032	1253.08		1.16248	1.09289	1108.8
								1.1387	1.10765	1756.44		1.14259	1.10793	1679.66		1.1527	1.10683	1538.67		1.16276	1.10045	1269.71		1.17253	1.10294	1122.56
								1.14874	1.11769	1774.45		1.15244	1.11779	1699.96		1.16255	1.11667	1558.12		1.1729	1.11059	1286.46		1.18275	1.11316	1136.34
								1.15867	1.12762	1792.33		1.16256	1.1279	1720.3		1.17202	1.12615	1577.65		1.18284	1.12053	1303.19		1.19288	1.12329	1150.19
								1.16873	1.13769	1810.17		1.17268	1.13802	1740.53		1.18135	1.13548	1597.15		1.19265	1.13034	1319.86		1.20287	1.13328	1164.12
								1.17869	1.14764	1827.96		1.18255	1.1479	1760.6		1.19131	1.14544	1616.79		1.20264	1.14033	1336.58		1.21285	1.14326	1178.12
								1.18849	1.15744	1845.7		1.19259	1.15794	1780.58		1.20193	1.15606	1636.61		1.21272	1.15041	1353.42		1.22277	1.15318	1192.19
								1.19847	1.16743	1863.42		1.20282	1.16817	1800.46		1.21238	1.16651	1656.62		1.22266	1.16035	1370.33		1.23261	1.16302	1206.22
								1.20869	1.17764	1881		1.21273	1.17808	1820.26		1.22238	1.17651	1676.87		1.23246	1.17016	1387.35		1.24239	1.1728	1220.2
								1.21866	1.18761	1898.34		1.22249	1.18784	1839.99		1.23244	1.18657	1697.41		1.24241	1.18011	1404.47		1.25234	1.18275	1234.24
								1.22856	1.19751	1915.46		1.2323	1.19765	1859.67		1.24267	1.19679	1718.15		1.25256	1.19025	1421.62		1.26244	1.19285	1248.39
								1.23878	1.20773	1932.51		1.24208	1.20743	1879.36		1.25276	1.20689	1738.85		1.26263	1.20032	1438.8		1.27255	1.20296	1262.63
								1.24886	1.21781	1949.36		1.25182	1.21716	1899.06		1.26269	1.21682	1759.43		1.27266	1.21035	1456.06		1.28256	1.21297	1276.94
								1.25866	1.22761	1964.87		1.26175	1.2271	1918.77		1.27256	1.22668	1779.98		1.28271	1.22041	1473.41		1.29267	1.22308	1291.27
								1.26845	1.2374	1977.98		1.27184	1.23719	1938.53		1.28243	1.23655	1800.65		1.29262	1.23032	1490.87		1.3029	1.23331	1305.58
								1.27844	1.2474	1988.56		1.2819	1.24724	1958.33		1.29237	1.24649	1821.44		1.30255	1.24024	1508.44		1.31298	1.24339	1319.88
								1.2881	1.25705	1996.64		1.29222	1.25757	1978.22		1.30249	1.25661	1842.24		1.31274	1.25043	1526.08		1.32291	1.25332	1334.19
								1.29464	1.2636	2002.23		1.30251	1.26785	1998.31		1.31252	1.26665	1862.98		1.32281	1.26051	1543.65		1.33277	1.26318	1348.5
								1.29706	1.26602	2005.42		1.31258	1.27793	2018.49		1.3225	1.27663	1883.7		1.33264	1.27034	1561.13		1.3426	1.27301	1362.86
								1.29796	1.26691	2006.34		1.32246	1.2878	2038.64		1.3327	1.28683	1904.53		1.34264	1.28033	1578.64		1.35248	1.28289	1377.31
								1.29871	1.26767	2004.99		1.33236	1.2977	2058.79		1.34293	1.29705	1925.41		1.35289	1.29058	1596.27		1.36255	1.29296	1391.78
								1.2993	1.26826	2001.34		1.34245	1.3078	2078.93		1.35289	1.30702	1946.38		1.36281	1.3005	1614		1.37257	1.30298	1406.23
								1.29966	1.26861	1995.58		1.3526	1.31795	2098.97		1.36275	1.31688	1967.45		1.37254	1.31023	1631.83		1.38247	1.31288	1420.67
								1.29986	1.26881	1988.81		1.36258	1.32793	2118.96		1.37266	1.32679	1988.57		1.38242	1.32012	1649.77		1.39265	1.32306	1435.16
								1.29997	1.26893	1982.1		1.37257	1.33792	2138.87		1.38251	1.33664	2009.66		1.39244	1.33014	1667.74		1.40294	1.33335	1449.69
								1.30004	1.269	1975.68		1.38271	1.34806	2158.7		1.39247	1.3466	2030.71		1.40248	1.34018	1685.67		1.41288	1.34329	1464.3
								1.30008	1.26904	1969.49		1.39283	1.35817	2178.44		1.4026	1.35673	2051.78		1.41264	1.35034	1703.58		1.42273	1.35314	1479.01
								1.3001	1.26906	1963.52		1.40275	1.3681	2198.08		1.41265	1.36678	2072.86		1.42282	1.36051	1721.56		1.43264	1.36305	1493.77
								1.30012	1.26907	1957.78		1.41263	1.37798	2217.61		1.42263	1.37675	2093.97		1.43285	1.37055	1739.65		1.44249	1.3729	1508.52
								1.30012	1.26907	1952.28		1.42249	1.38784	2237.08		1.43275	1.38688	2115.17		1.44283	1.38053	1757.84		1.45243	1.38284	1523.25
								1.30011	1.26907	1946.99		1.43239	1.39774	2256.55		1.44288	1.39701	2136.44		1.45275	1.39044	1776.11		1.46257	1.39298	1537.99
								1.30011	1.26907	1941.93		1.44245	1.4078	2275.97		1.45279	1.40691	2157.61		1.46265	1.40034	1794.39		1.47261	1.40302	1552.79
								1.3001	1.26906	1937.07		1.45254	1.41788	2295.22		1.4626	1.41673	2178.64		1.47246	1.41016	1812.61		1.48252	1.41293	1567.67
								1.3001	1.26905	1932.4		1.4625	1.42784	2314.31		1.47263	1.42675	2199.71		1.48235	1.42004	1830.85		1.49263	1.42304	1582.69
								1.3001	1.26905	1927.91		1.4726	1.43794	2333.32		1.48271	1.43683	2220.85		1.49239	1.43008	1849.2		1.50277	1.43318	1597.85
								1.30009	1.26904	1923.59		1.48287	1.44822	2352.24		1.49261	1.44674	2242.02		1.50252	1.44022	1867.67		1.51268	1.44309	1612.94
								1.30008	1.26904	1919.44		1.49292	1.45826	2371.09		1.50243	1.45656	2263.25		1.51257	1.45026	1886.2		1.52253	1.45294	1627.94
								1.30008	1.26903	1915.43		1.5028	1.46814	2389.89		1.51243	1.46656	2284.53		1.52258	1.46028	1904.76		1.53259	1.463	1642.99
								1.30007	1.26902	1911.56		1.51271	1.47806	2408.63		1.52256	1.47669	2305.77		1.53279	1.47048	1923.32		1.54276	1.47317	1658.14
								1.30006	1.26902	1907.81		1.5226	1.48795	2427.2		1.53261	1.48674	2326.97		1.54297	1.48067	1941.88		1.55275	1.48316	1673.32
								1.30006	1.26901	1904.18		1.53247	1.49781	2445.45		1.54267	1.49679	2348.21		1.55293	1.49063	1960.46		1.56261	1.49302	1688.58
								1.30005	1.26901	1900.67		1.54256	1.50791	2463.22		1.5527	1.50683	2369.49		1.56279	1.50048	1979.05		1.57261	1.50303	1703.92
								1.30005	1.269	1897.26		1.55268	1.51803	2480.84		1.56258	1.51671	2390.81		1.5726	1.51029	1997.7		1.58274	1.51315	1719.21
												1.56262	1.52797	2498.33		1.57252	1.52665	2412.2		1.58246	1.52016	2016.46		1.59272	1.52313	1734.44
												1.57271	1.53805	2515.79		1.58275	1.53687	2433.58		1.5925	1.5302	2035.28		1.60268	1.53309	1749.71
												1.5829	1.54824	2533.25		1.59281	1.54694	2454.8		1.60257	1.54026	2054.07		1.61272	1.54313	1765.08
												1.59286	1.55821	2550.55		1.6026	1.55673	2475.84		1.61249	1.55019	2072.85		1.62262	1.55303	1780.53
												1.60263	1.56798	2567.57		1.61265	1.56678	2496.85		1.62257	1.56027	2091.69		1.63243	1.56284	1796.07
												1.61258	1.57793	2584.49		1.6229	1.57702	2517.93		1.63288	1.57058	2110.57		1.64256	1.57297	1811.68
												1.6227	1.58805	2601.4		1.63277	1.5869	2539.04		1.64289	1.58059	2129.5		1.65268	1.58309	1827.28
												1.63267	1.59802	2618.37		1.6425	1.59662	2560.16		1.65278	1.59048	2148.54		1.66253	1.59294	1842.82
												1.6425	1.60784	2635.62		1.65244	1.60657	2581.27		1.66268	1.60038	2167.64		1.67256	1.60297	1858.39
												1.65243	1.61777	2652.84		1.66245	1.61658	2602.28		1.67253	1.61022	2186.73		1.6828	1.61321	1874.11
												1.66254	1.62788	2669.95		1.67248	1.62661	2623.08		1.68241	1.62011	2205.77		1.69273	1.62314	1889.95
												1.67264	1.63798	2686.88		1.68267	1.6368	2643.73		1.69252	1.63021	2224.8		1.70252	1.63293	1905.86
												1.68266	1.64801	2703.69		1.69285	1.64698	2664.37		1.70261	1.64031	2243.87		1.71247	1.64288	1921.85
												1.69273	1.65808	2720.45		1.70282	1.65695	2684.98		1.71252	1.65022	2262.98		1.72248	1.65289	1937.89
												1.70265	1.66799	2737.15		1.71277	1.6669	2705.56		1.72259	1.66028	2282.24		1.73248	1.66289	1953.91
												1.71254	1.67788	2753.81		1.72268	1.67681	2726.11		1.73273	1.67042	2301.68		1.74259	1.67301	1969.89
												1.72264	1.68799	2770.4		1.7326	1.68673	2746.52		1.74272	1.68041	2321.11		1.75276	1.68317	1985.92
												1.7328	1.69815	2786.75		1.74242	1.69655	2766.71		1.75255	1.69025	2340.41		1.76278	1.69319	2002.03
												1.74268	1.70803	2802.81		1.75229	1.70642	2786.81		1.76253	1.70023	2359.71		1.77283	1.70324	2018.2
												1.75259	1.71794	2818.64		1.76236	1.71649	2806.92		1.77269	1.71039	2379.1		1.78284	1.71325	2034.41
												1.76286	1.7282	2833.39		1.77251	1.72664	2827.02		1.78276	1.72046	2398.52		1.79276	1.72317	2050.62
												1.77289	1.73824	2847.92		1.78255	1.73668	2847.02		1.79264	1.73034	2418.01		1.8026	1.73301	2066.76
												1.78262	1.74797	2862.41		1.79258	1.74671	2866.86		1.8026	1.7403	2437.59		1.8125	1.74291	2082.91
												1.79246	1.7578	2876.85		1.8028	1.75693	2886.53		1.81269	1.75039	2457.18		1.82255	1.75297	2099.14
												1.8025	1.76784	2891.17		1.81296	1.76709	2906.02		1.82273	1.76042	2476.62		1.83268	1.76309	2115.47
												1.81251	1.77785	2905.29		1.8229	1.77703	2925.33		1.83266	1.77035	2496.06		1.84263	1.77304	2131.87
												1.82262	1.78797	2919.17		1.83273	1.78686	2944.43		1.8427	1.7804	2515.59		1.85259	1.783	2148.29
												1.8328	1.79814	2932.95		1.84255	1.79668	2963.41		1.85266	1.79035	2535.17		1.86272	1.79313	2164.71
												1.84282	1.80817	2946.69		1.85245	1.80658	2982.33		1.86246	1.80015	2554.82		1.87285	1.80326	2181.13
												1.85283	1.81817	2960.32		1.86252	1.81665	3001.08		1.87247	1.81016	2574.56		1.88278	1.81319	2197.58
												1.86276	1.8281	2973.68		1.87256	1.82669	3019.57		1.88266	1.82036	2594.27		1.89263	1.82304	2214.04
												1.87266	1.838	2984.73		1.88248	1.83661	3037.85		1.89262	1.83031	2613.85		1.90247	1.83288	2230.58
												1.88249	1.84784	2992.99		1.89261	1.84674	3055.98		1.90252	1.84022	2633.36		1.91239	1.84281	2247.25
												1.89212	1.85747	2998.64		1.9029	1.85703	3073.94		1.91277	1.85047	2652.93		1.92245	1.85286	2263.97
												1.89904	1.86438	3001.86		1.91288	1.86701	3091.76		1.92281	1.86051	2672.59		1.93253	1.86294	2280.61
												1.90278	1.86813	3001.1		1.92276	1.87689	3109.46		1.93258	1.87028	2692.29		1.94253	1.87294	2297.21
												1.90361	1.86895	2997.24		1.93266	1.88679	3127.04		1.94243	1.88013	2712.04		1.95266	1.88307	2313.86
												1.90423	1.86957	2991.12		1.94248	1.89661	3144.39		1.95247	1.89016	2731.82		1.96295	1.89336	2330.53
												1.90461	1.86995	2982.87		1.95241	1.90654	3161.47		1.96242	1.90011	2751.57		1.97292	1.90334	2347.25
												1.90483	1.87018	2973.6		1.96255	1.91667	3178.35		1.97247	1.91017	2771.21		1.98277	1.91318	2364.07
												1.90496	1.87031	2964.53		1.97261	1.92674	3195.05		1.98268	1.92037	2790.85		1.99269	1.9231	2380.96
												1.90504	1.87039	2955.9		1.98251	1.93664	3211.62		1.99275	1.93045	2810.53		2.00257	1.93298	2397.82
												1.90509	1.87043	2947.65		1.99261	1.94674	3228.18		2.00282	1.94051	2830.25		2.01244	1.94285	2414.63
												1.90511	1.87045	2939.73		2.00277	1.95689	3244.72		2.01283	1.95053	2850.01		2.02255	1.95296	2431.43
												1.90512	1.87047	2932.17		2.0127	1.96683	3261.03		2.02278	1.96048	2869.76		2.03266	1.96307	2448.27
												1.90513	1.87047	2924.96		2.02252	1.97664	3277.04		2.03264	1.97034	2889.4		2.04262	1.97304	2465.15
												1.90512	1.87047	2918.06		2.03255	1.98668	3292.89		2.0425	1.9802	2908.96		2.05271	1.98312	2482.12
												1.90512	1.87047	2911.47		2.04272	1.99684	3308.68		2.0525	1.99019	2928.57		2.06284	1.99325	2499.25
												1.90512	1.87046	2905.15		2.05276	2.00689	3324.31		2.06263	2.00032	2948.23		2.07281	2.00322	2516.35
												1.90511	1.87046	2899.09		2.06263	2.01676	3339.84		2.07263	2.01032	2967.93		2.08262	2.01303	2533.34
												1.9051	1.87045	2893.27		2.07261	2.02674	3355.33		2.08254	2.02024	2987.63		2.09255	2.02296	2550.34
												1.9051	1.87044	2887.67		2.08274	2.03686	3370.65		2.09266	2.03035	3007.31		2.10264	2.03305	2567.44
												1.90508	1.87043	2882.27		2.09275	2.04688	3385.68		2.10285	2.04055	3026.96		2.11263	2.04304	2584.61
												1.90508	1.87042	2877.06		2.10267	2.0568	3400.55		2.11281	2.05051	3046.62		2.12249	2.0529	2601.87
												1.90507	1.87042	2872.02		2.1127	2.06683	3415.36		2.12266	2.06035	3066.31		2.13245	2.06286	2619.23
												1.90507	1.87041	2867.15		2.12264	2.07677	3430.11		2.13249	2.07018	3086.02		2.14255	2.07296	2636.62
												1.90506	1.87041	2862.43		2.13244	2.08657	3444.79		2.14238	2.08008	3105.81		2.15262	2.08304	2653.97
												1.90505	1.8704	2857.85		2.14251	2.09664	3459.41		2.1524	2.0901	3125.66		2.16265	2.09306	2671.37
												1.90505	1.8704	2853.39		2.15266	2.10679	3473.83		2.16253	2.10023	3145.4		2.17275	2.10316	2688.86
																2.16258	2.11671	3487.98		2.17254	2.11024	3165.04		2.18267	2.11308	2706.44
																2.17254	2.12666	3501.94		2.18259	2.12028	3184.64		2.19252	2.12293	2724.11
																2.1828	2.13693	3515.84		2.19286	2.13056	3204.26		2.20263	2.13304	2741.82
																2.19282	2.14694	3529.67		2.20293	2.14063	3223.85		2.2128	2.14321	2759.43
																2.20256	2.15669	3543.36		2.21279	2.15049	3243.47		2.2227	2.15311	2776.9
																2.21243	2.16656	3556.95		2.22267	2.16037	3263.11		2.23263	2.16304	2794.37
																2.22247	2.1766	3570.38		2.2326	2.1703	3282.67		2.24288	2.17329	2811.98
																2.23245	2.18658	3583.6		2.24245	2.18015	3302.12		2.2528	2.18321	2829.7
																2.24249	2.19662	3596.53		2.25251	2.1902	3321.48		2.26251	2.19292	2847.49
																2.25268	2.2068	3609.29		2.26267	2.20037	3340.81		2.2724	2.20281	2865.34
																2.26276	2.21688	3621.92		2.27263	2.21032	3360.09		2.28247	2.21288	2883.21
																2.27285	2.22698	3634.38		2.28265	2.22035	3379.4		2.29248	2.22289	2901.03
																2.28287	2.237	3646.69		2.29281	2.23051	3398.78		2.30258	2.23299	2918.79
																2.2928	2.24693	3658.83		2.30282	2.24052	3418.12		2.31276	2.24317	2936.64
																2.30265	2.25678	3670.74		2.31265	2.25034	3437.24		2.32282	2.25323	2954.57
																2.31251	2.26664	3682.45		2.32253	2.26023	3456.21		2.33282	2.26323	2972.56
																2.32252	2.27665	3694.03		2.3326	2.2703	3475.2		2.34273	2.27314	2990.58
																2.33262	2.28675	3705.51		2.34266	2.28035	3494.15		2.35264	2.28306	3008.6
																2.34262	2.29675	3716.88		2.35254	2.29024	3513.03		2.3625	2.29291	3026.53
																2.35258	2.30671	3728.09		2.36243	2.30013	3531.93		2.37238	2.30279	3044.42
																2.3627	2.31683	3739.11		2.37252	2.31021	3550.76		2.3824	2.31281	3062.38
																2.37285	2.32698	3749.93		2.38264	2.32034	3569.42		2.39252	2.32293	3080.42
																2.38282	2.33695	3760.59		2.39263	2.33033	3587.94		2.40259	2.333	3098.54
																2.39269	2.34682	3771.04		2.40272	2.34041	3606.39		2.41259	2.343	3116.65
																2.4025	2.35663	3781.31		2.41268	2.35038	3624.8		2.42279	2.35321	3134.72
																2.41239	2.36652	3791.47		2.42251	2.3602	3643.16		2.43297	2.36338	3152.73
																2.42245	2.37658	3801.48		2.43255	2.37025	3661.48		2.44293	2.37334	3170.73
																2.43255	2.38668	3811.18		2.44276	2.38046	3679.64		2.45283	2.38324	3188.72
																2.44254	2.39667	3820.57		2.45272	2.39042	3697.51		2.46264	2.39305	3206.72
																2.45262	2.40674	3829.81		2.46259	2.40028	3715.16		2.47245	2.40287	3224.79
																2.46293	2.41706	3838.95		2.47281	2.4105	3732.76		2.48248	2.41289	3242.92
																2.47293	2.42706	3847.98		2.48291	2.42061	3750.34		2.49259	2.423	3260.99
																2.48278	2.43691	3856.68		2.49269	2.43038	3767.88		2.50256	2.43297	3279
																2.4927	2.44683	3864.97		2.50245	2.44015	3785.37		2.51257	2.44298	3297.02
																2.50262	2.45675	3872.89		2.51248	2.45017	3802.77		2.52284	2.45325	3315.07
																2.51246	2.46659	3880.5		2.52249	2.46019	3820.01		2.5329	2.46331	3333.12
																2.52255	2.47667	3887.95		2.53255	2.47025	3837.02		2.54279	2.4732	3351.23
																2.53271	2.48684	3895.42		2.54272	2.48041	3853.92		2.55273	2.48314	3369.38
																2.54269	2.49681	3902.98		2.55279	2.49048	3870.81		2.56261	2.49302	3387.45
																2.55274	2.50687	3910.74		2.5628	2.50049	3887.66		2.57243	2.50284	3405.44
																2.56287	2.51699	3918.79		2.57274	2.51043	3904.44		2.58254	2.51295	3423.37
																2.57283	2.52695	3927.04		2.58264	2.52034	3921.13		2.59269	2.5231	3441.29
																2.58263	2.53676	3935.69		2.59251	2.53021	3937.62		2.60256	2.53298	3459.2
																2.59255	2.54667	3944.99		2.60239	2.54008	3953.95		2.61255	2.54297	3477.24
																2.60262	2.55675	3954.96		2.61238	2.55007	3970.23		2.62268	2.5531	3495.46
																2.61264	2.56677	3965.45		2.62248	2.56018	3986.5		2.63267	2.56308	3513.7
																2.62254	2.57667	3976.05		2.63255	2.57025	4002.7		2.64248	2.57289	3531.75
																2.63248	2.58661	3985.35		2.64254	2.58024	4018.81		2.65245	2.58286	3549.75
																2.64258	2.59671	3992.42		2.65269	2.59039	4034.76		2.66267	2.59308	3567.83
																2.65266	2.60678	3997.09		2.66298	2.60067	4050.56		2.67282	2.60323	3585.94
																2.66198	2.61611	3999.47		2.67297	2.61067	4066.22		2.6827	2.61311	3604.03
																2.66933	2.62346	3997.71		2.68284	2.62053	4081.76		2.6926	2.62301	3622.18
																2.67012	2.62425	3993.59		2.69266	2.63035	4097.18		2.7027	2.63311	3640.31
																2.67085	2.62497	3987.31		2.70249	2.64018	4112.52		2.7128	2.64321	3658.26
																2.67139	2.62551	3978.89		2.71246	2.65016	4127.8		2.72268	2.65309	3676.11
																2.67171	2.62583	3968.68		2.7226	2.66029	4142.92		2.73268	2.66309	3693.99
																2.67189	2.62602	3958.12		2.73259	2.67029	4157.88		2.74266	2.67308	3711.93
																2.672	2.62613	3948.15		2.74256	2.68025	4172.73		2.75249	2.6829	3729.91
																2.67207	2.62619	3938.81		2.75276	2.69045	4187.49		2.76247	2.69288	3747.95
																2.6721	2.62622	3929.97		2.76291	2.7006	4202.12		2.77271	2.70312	3765.96
																2.67212	2.62625	3921.57		2.77282	2.71052	4216.69		2.7827	2.71311	3783.81
																2.67213	2.62626	3913.6		2.78274	2.72044	4231.24		2.79256	2.72297	3801.54
																2.67213	2.62626	3906.01		2.79267	2.73037	4245.64		2.80278	2.73319	3819.31
																2.67213	2.62625	3898.77		2.80247	2.74017	4259.69		2.81291	2.74333	3837.18
																2.67212	2.62625	3891.87		2.81246	2.75016	4273.52		2.82266	2.75307	3855.06
																2.67211	2.62624	3885.25		2.82268	2.76037	4287.22		2.83239	2.7628	3872.94
																				2.83266	2.77036	4300.78		2.84237	2.77278	3890.81
																				2.84254	2.78024	4314.29		2.8524	2.78281	3908.64
																				2.85265	2.79034	4327.9		2.86245	2.79286	3926.34
																				2.86273	2.80042	4341.51		2.87259	2.803	3944.03
																				2.87257	2.81026	4354.86		2.88268	2.81309	3961.79
																				2.88244	2.82014	4367.97		2.89274	2.82315	3979.63
																				2.89262	2.83032	4381.07		2.90276	2.83317	3997.45
																				2.90283	2.84052	4394.29		2.91276	2.84317	4015.21
																				2.91277	2.85047	4407.47		2.92268	2.85309	4032.87
																				2.92264	2.86033	4420.65		2.93256	2.86297	4050.42
																				2.93268	2.87037	4433.8		2.94254	2.87295	4067.96
																				2.94278	2.88048	4446.75		2.95262	2.88303	4085.51
																				2.95271	2.8904	4459.45		2.96265	2.89306	4103.08
																				2.96269	2.90039	4472.04		2.97256	2.90297	4120.6
																				2.9727	2.9104	4484.59		2.98261	2.91302	4138
																				2.98254	2.92024	4497.06		2.99279	2.9232	4155.29
																				2.99243	2.93013	4509.51		3.00283	2.93324	4172.53
																				3.00265	2.94035	4521.88		3.01274	2.94315	4189.72
																				3.01276	2.95045	4534		3.02256	2.95297	4206.88
																				3.02261	2.9603	4545.84		3.03247	2.96288	4224.07
																				3.03272	2.97041	4557.6		3.04245	2.97286	4241.3
																				3.04295	2.98065	4569.41		3.05254	2.98295	4258.4
																				3.05277	2.99047	4581.25		3.06254	2.99295	4275.31
																				3.06243	3.00013	4593.08		3.07254	3.00295	4292.14
																				3.07235	3.01004	4604.9		3.08279	3.0132	4308.93
																				3.0824	3.02009	4616.69		3.09293	3.02334	4325.64
																				3.09245	3.03015	4628.33		3.10281	3.03322	4342.32
																				3.1026	3.04029	4639.87		3.11268	3.04309	4359.01
																				3.11272	3.05042	4651.45		3.12264	3.05305	4375.6
																				3.12276	3.06046	4663.12		3.13249	3.0629	4392.01
																				3.1328	3.07049	4674.78		3.14249	3.0729	4408.23
																				3.14278	3.08048	4686.38		3.15269	3.0831	4424.36
																				3.15268	3.09037	4697.84		3.16273	3.09314	4440.4
																				3.16258	3.10027	4709.18		3.17271	3.10312	4456.36
																				3.17253	3.11022	4720.45		3.18279	3.11321	4472.35
																				3.18258	3.12028	4731.75		3.19284	3.12325	4488.29
																				3.19266	3.13035	4743.06		3.20266	3.13308	4503.96
																				3.20259	3.14029	4754.36		3.21252	3.14293	4519.37
																				3.21258	3.15027	4765.55		3.2226	3.15302	4534.72
																				3.22278	3.16048	4776.62		3.23273	3.16314	4550.02
																				3.23286	3.17056	4787.61		3.24262	3.17303	4565.24
																				3.2428	3.18049	4798.57		3.25248	3.18289	4580.38
																				3.25264	3.19034	4809.5		3.26253	3.19294	4595.41
																				3.2625	3.20019	4820.44		3.27262	3.20303	4610.24
																				3.27243	3.21013	4831.28		3.28263	3.21304	4624.84
																				3.28252	3.22022	4840.28		3.2927	3.22311	4639.34
																				3.29256	3.23026	4848.8		3.3027	3.23311	4653.79
																				3.30255	3.24025	4857.11		3.31254	3.24295	4668.15
																				3.31273	3.25042	4865.4		3.32251	3.25292	4682.42
																				3.32296	3.26065	4873.61		3.33273	3.26314	4696.5
																				3.3329	3.27059	4881.8		3.34278	3.27319	4710.28
																				3.34272	3.28042	4890.01		3.35263	3.28304	4723.76
																				3.35268	3.29037	4898.18		3.36274	3.29315	4737.14
																				3.36253	3.30023	4906.2		3.37291	3.30332	4750.48
																				3.37248	3.31018	4914.23		3.38275	3.31316	4763.75
																				3.38265	3.32034	4923.95		3.39248	3.32289	4776.91
																				3.39277	3.33046	4933.9		3.40244	3.33285	4789.92
																				3.40274	3.34043	4943.9		3.4125	3.34291	4802.76
																				3.41282	3.35051	4953.97		3.42257	3.35298	4815.35
																				3.42286	3.36056	4964.08		3.4327	3.36311	4827.77
																				3.43275	3.37044	4973.78		3.4428	3.37321	4840.12
																				3.44255	3.38024	4981.73		3.45282	3.38323	4852.45
																				3.45256	3.39026	4987.18		3.46281	3.39322	4864.71
																				3.46272	3.40042	4990.12		3.4727	3.40311	4876.84
																				3.47804	3.41573	4988.83		3.48256	3.41297	4888.77
																				3.48012	3.41782	4984.83		3.49243	3.42284	4900.48
																				3.48104	3.41874	4978.68		3.50238	3.43279	4912.1
																				3.48179	3.41949	4970.34		3.51249	3.4429	4923.68
																				3.48235	3.42005	4959.89		3.52261	3.45302	4935.21
																				3.48268	3.42037	4947.76		3.53259	3.463	4946.67
																				3.48288	3.42057	4935.24		3.54266	3.47307	4957.96
																				3.483	3.42069	4923.24		3.55288	3.48329	4969.06
																				3.48306	3.42076	4911.89		3.56295	3.49336	4979.99
																				3.4831	3.4208	4901.07		3.57288	3.50329	4990.78
																				3.48312	3.42082	4890.75		3.58272	3.51313	5001.46
																				3.48313	3.42083	4880.92		3.59257	3.52298	5012.09
																				3.48313	3.42083	4871.53		3.60252	3.53293	5022.7
																				3.48313	3.42083	4862.56		3.61258	3.54299	5033.18
																								3.62257	3.55298	5043.46
																								3.63254	3.56295	5053.6
																								3.64274	3.57315	5063.65
																								3.65294	3.58335	5073.58
																								3.66289	3.5933	5083.44
																								3.6728	3.60321	5093.27
																								3.6827	3.61311	5102.98
																								3.69249	3.6229	5112.47
																								3.70243	3.63284	5121.75
																								3.71259	3.643	5130.89
																								3.72262	3.65303	5139.89
																								3.73252	3.66294	5148.83
																								3.74262	3.67303	5157.84
																								3.75273	3.68315	5166.87
																								3.76262	3.69303	5175.69
																								3.77248	3.70289	5184.28
																								3.78258	3.71299	5192.79
																								3.79281	3.72322	5201.26
																								3.80281	3.73322	5209.62
																								3.8127	3.74311	5217.94
																								3.82274	3.75315	5226.25
																								3.83281	3.76322	5234.4
																								3.84269	3.7731	5242.3
																								3.85265	3.78307	5250.08
																								3.86271	3.79312	5257.84
																								3.87264	3.80305	5265.57
																								3.88248	3.81289	5273.31
																								3.89261	3.82302	5281.04
																								3.90272	3.83313	5288.6
																								3.91259	3.843	5295.94
																								3.92263	3.85305	5303.17
																								3.9329	3.86331	5307.04
																								3.94279	3.87321	5304.46
																								3.95248	3.88289	5295.17
																								3.96238	3.89279	5285.14
																								3.97242	3.90283	5274.99
																								3.9825	3.91291	5264.76
																								3.9927	3.92311	5254.59
																								4.00291	3.93332	5244.65
																								4.01294	3.94335	5234.97
																								4.02292	3.95333	5225.53
																								4.03288	3.9633	5219.66
																								4.05268	3.98309	5227.96
																								4.06257	3.99298	5236.38
																								4.0726	4.00301	5245.09
																								4.08267	4.01308	5253.98
																								4.09265	4.02307	5262.9
																								4.10262	4.03303	5271.73
																								4.11275	4.04316	5280.43
																								4.12286	4.05327	5289.01
																								4.13283	4.06324	5297.48
																								4.14269	4.0731	5305.85
																								4.15252	4.08294	5314.14
																								4.16246	4.09287	5322.41
																								4.17252	4.10293	5330.56
																								4.18255	4.11297	5338.45
																								4.19254	4.12295	5331.84
																								4.20267	4.13308	5317.19
																								4.21291	4.14332	5302.04
																								4.22288	4.15329	5286.68
																								4.23272	4.16313	5271.4
																								4.24277	4.17318	5256.32
																								4.25281	4.18322	5241.35
																								4.26266	4.19307	5226.54
																								4.27265	4.20306	5211.96
																								4.28274	4.21316	5197.69
																								4.3028	4.23321	5206.64
																								4.31288	4.24329	5216.11
																								4.32277	4.25318	5225.96
																								4.33253	4.26294	5235.84
																								4.34251	4.27292	5245.75
																								4.35266	4.28308	5255.73
																								4.36266	4.29307	5265.66
																								4.37254	4.30295	5275.53
																								4.38254	4.31295	5285.37
																								4.39266	4.32307	5295.09
																								4.40265	4.33306	5304.59
																								4.41263	4.34304	5313.94
																								4.42271	4.35312	5323.24
																								4.43259	4.363	5332.43
																								4.44243	4.37284	5341.49
																								4.45258	4.38299	5350.43
																								4.4628	4.39321	5359.18
																								4.47273	4.40315	5367.61
																								4.48266	4.41307	5375.82
																								4.49291	4.42332	5383.96
																								4.50295	4.43336	5392.03
																								4.51267	4.44309	5399.96
																								4.52247	4.45288	5407.75
																								4.5325	4.46291	5415.38
																								4.54255	4.47297	5422.81
																								4.55263	4.48304	5429.99
																								4.56276	4.49317	5437.03
																								4.57283	4.50324	5444.01
																								4.58287	4.51328	5450.94
																								4.59279	4.5232	5457.77
																								4.60266	4.53307	5464.42
																								4.61251	4.54293	5470.86
																								4.62239	4.5528	5477.06
																								4.63243	4.56284	5483.16
																								4.64255	4.57296	5489.23
																								4.6526	4.58301	5495.23
																								4.6626	4.59301	5501.11
																								4.67279	4.6032	5506.85
																								4.68302	4.61343	5512.15
																								4.693	4.62341	5517.05
																								4.70283	4.63324	5521.84
																								4.71262	4.64304	5526.56
																								4.7225	4.65291	5531.37
																								4.73256	4.66297	5536.15
																								4.74264	4.67305	5540.78
																								4.7526	4.68301	5545.28
																								4.76265	4.69306	5549.76
																								4.77288	4.7033	5554.21
																								4.78287	4.71328	5558.91
																								4.79279	4.7232	5563.93
																								4.80271	4.73312	5568.97
																								4.81255	4.74296	5573.92
																								4.82238	4.75279	5578.71
																								4.83248	4.76289	5583.4
																								4.84266	4.77308	5588.01
																								4.85257	4.78299	5592.54
																								4.86261	4.79302	5597.07
																								4.87279	4.8032	5601.67
																								4.88277	4.81318	5606.19
																								4.89254	4.82295	5610.45
																								4.90251	4.83292	5614.58
																								4.91272	4.84313	5618.7
																								4.92281	4.85323	5622.74
																								4.93269	4.8631	5626.69
																								4.94263	4.87304	5630.63
																								4.95277	4.88318	5634.48
																								4.96282	4.89323	5638.11
																								4.97273	4.90314	5641.57
																								4.98277	4.91318	5645
																								4.99273	4.92314	5648.36
																								5.00251	4.93292	5651.64
																								5.01247	4.94288	5654.84
																								5.0227	4.95311	5657.89
																								5.0327	4.96311	5660.65
																								5.04256	4.97297	5663.17
																								5.05278	4.98319	5665.59
																								5.06292	4.99333	5667.93
																								5.07268	5.00309	5670.1
																								5.08242	5.01283	5672
																								5.0924	5.02281	5673.49
																								5.10243	5.03284	5673.91
																								5.11252	5.04293	5489.69

## Sheet: BH 3
BH 3 (1000 N)				BH 3 (1500 N)				BH 3 (2000 N)				BH 3 (3000 N)				BH 3 (4000 N)				BH 3 (5000 N)
Standard travel	Displacement corrected	Standard force		Standard travel	Displacement corrected	Standard force		Standard travel	Displacement corrected	Standard force		Standard travel	Displacement corrected	Standard force		Standard travel	Displacement corrected	Standard force		Standard travel	Displacement corrected	Standard force
mm	mm	N		mm	mm	N		mm	mm	N		mm	mm	N		mm	mm	N		mm	mm	N
0	-0.0281436	124.442		0	-0.028073	126.317		0	-0.0305482	123.623		0	-0.0146529	134.977		0	-0.018258	130.795		0	-0.0186953	130.289
3.54052e-07	-0.0281433	123.314		-4.84943e-06	-0.0280779	125.153		-5.0211e-06	-0.0305533	122.476		-4.4632e-06	-0.0146574	133.845		-4.75287e-06	-0.0182627	129.786		-3.55124e-06	-0.0186988	129.243
1.52349e-06	-0.0281421	122.275		-2.96116e-06	-0.028076	124.069		-5.07474e-06	-0.0305533	121.439		-3.30448e-06	-0.0146562	132.737		-7.82132e-06	-0.0182658	128.75		-1.23382e-06	-0.0186965	128.241
-9.87053e-07	-0.0281446	121.144		-9.33409e-07	-0.028074	123.043		-4.60267e-06	-0.0305528	120.32		-2.13504e-06	-0.0146551	131.67		-4.19498e-06	-0.0182622	127.696		-3.18646e-06	-0.0186985	127.313
4.29153e-07	-0.0281432	120.079		-3.40104e-06	-0.0280764	121.972		-8.78692e-06	-0.030557	119.277		0.000654126	-0.0139988	131.158		-1.02353e-05	-0.0182682	126.618		4.63808e-05	-0.0186489	126.537
2.75302e-05	-0.0281161	118.978		-1.10829e-05	-0.0280841	120.962		-8.29339e-06	-0.0305565	118.212		0.00248706	-0.0121659	132.493		0.00251765	-0.0157403	127.943		0.00267027	-0.016025	128.066
0.00283636	-0.0253073	120.534		0.00294926	-0.0251238	122.064		0.00296335	-0.0275849	119.464		0.00411228	-0.0105407	134.37		0.00415354	-0.0141044	129.873		0.00435923	-0.0143361	129.844
0.00466744	-0.0234762	122.332		0.00470081	-0.0233722	123.734		0.00472187	-0.0258264	121.098		0.00509588	-0.00955707	135.641		0.00513387	-0.0131241	131.153		0.00535133	-0.013344	131.023
0.00571067	-0.022433	123.501		0.0057178	-0.0223552	124.827		0.0057577	-0.0247905	122.147		0.00616996	-0.00848298	137.135		0.00619086	-0.0120671	132.647		0.00644873	-0.0122466	132.395
0.00684178	-0.0213019	124.852		0.00683099	-0.021242	126.088		0.00687703	-0.0236712	123.357		0.00732964	-0.0073233	138.855		0.00734322	-0.0109147	134.354		0.00764304	-0.0110522	133.966
0.00806303	-0.0200806	126.364		0.00806837	-0.0200047	127.503		0.0080975	-0.0224507	124.711		0.00859341	-0.00605953	140.793		0.00859265	-0.00966531	136.258		0.00891786	-0.00977742	135.725
0.00938259	-0.018761	128.015		0.00939716	-0.0186759	129.058		0.0094048	-0.0211434	126.2		0.00997059	-0.00468235	142.921		0.00994771	-0.00831024	138.347		0.01029	-0.0084053	137.641
0.0107852	-0.0173585	129.781		0.0108251	-0.0172479	130.736		0.010813	-0.0197353	127.801		0.0114383	-0.0032146	145.216		0.0113917	-0.00686628	140.6		0.0117635	-0.00693175	139.698
0.0123102	-0.0158334	131.657		0.0123448	-0.0157282	132.531		0.0123244	-0.0182238	129.506		0.012997	-0.00165593	147.678		0.0129418	-0.00531619	142.995		0.0133474	-0.00534792	141.869
0.0139236	-0.01422	133.647		0.0139575	-0.0141155	134.426		0.0139356	-0.0166127	131.311		0.0146529	0	150.295		0.0146027	-0.00365523	145.534		0.0150247	-0.00367059	144.155
0.0156545	-0.0124891	135.759		0.0156552	-0.0124178	136.429		0.0156664	-0.0148819	133.219		0.0163933	0.00174036	153.068		0.0163754	-0.00188253	148.211		0.0168127	-0.00188262	146.553
0.0174709	-0.0106727	138.004		0.0174687	-0.0106043	138.547		0.0174832	-0.013065	135.223		0.0182464	0.00359347	156.001		0.018258	0	151.024		0.0186953	0	149.067
0.019392	-0.00875164	140.37		0.0193627	-0.00871033	140.768		0.0194127	-0.0111356	137.325		0.0202103	0.0055574	159.101		0.0202087	0.00195077	153.979		0.0206803	0.00198505	151.695
0.0214102	-0.00673345	142.867		0.0213814	-0.00669165	143.097		0.0214527	-0.00909553	139.532		0.0222735	0.00762054	162.357		0.0222747	0.00401675	157.07		0.0227754	0.0040801	154.444
0.0235464	-0.00459723	145.491		0.0234937	-0.0045793	145.526		0.0235789	-0.00696931	141.832		0.0244543	0.00980132	165.758		0.0244382	0.00618028	160.297		0.024946	0.00625068	157.31
0.025795	-0.00234865	148.236		0.0257288	-0.00234427	148.059		0.0258041	-0.00474416	144.228		0.0267652	0.0121122	169.294		0.0266798	0.00842184	163.666		0.0272108	0.0085155	160.287
0.0281436	0	151.086		0.028073	0	150.687		0.0281257	-0.00242253	146.717		0.0291875	0.0145346	172.973		0.0290217	0.0107637	167.171		0.0295725	0.0108772	163.389
0.0305949	0.0024513	154.048		0.030489	0.00241598	153.414		0.0305482	0	149.309		0.0316688	0.0170158	176.797		0.0314762	0.0132182	170.8		0.0320263	0.013331	166.615
0.0331349	0.00499131	157.122		0.0329873	0.00491427	156.24		0.0330717	0.00252342	151.985		0.0342397	0.0195867	180.761		0.0340368	0.0157788	174.559		0.0345978	0.0159026	169.965
0.0357398	0.00759618	160.319		0.0355891	0.00751608	159.176		0.0357064	0.00515817	154.742		0.0368749	0.022222	184.864		0.0367287	0.0184708	178.433		0.0372881	0.0185928	173.426
0.0384189	0.0102753	163.632		0.0383014	0.0102283	162.226		0.0384619	0.00791368	157.578		0.0395954	0.0249425	189.091		0.039535	0.021277	182.422		0.0400808	0.0213855	177.003
0.0411943	0.0130507	167.057		0.0411296	0.0130566	165.374		0.041328	0.0107797	160.5		0.0424456	0.0277927	193.44		0.042418	0.0241601	186.529		0.042969	0.0242737	180.696
0.0441189	0.0159752	170.604		0.044065	0.0159919	168.631		0.0442673	0.013719	163.519		0.0453944	0.0307415	197.904		0.0453641	0.0271061	190.761		0.0459196	0.0272243	184.509
0.0471684	0.0190248	174.276		0.0471144	0.0190413	171.986		0.0472683	0.0167201	166.633		0.0484844	0.0338315	202.496		0.0483931	0.0301351	195.124		0.0489685	0.0302732	188.426
0.050291	0.0221473	178.076		0.0502586	0.0221856	175.441		0.0503335	0.0197853	169.851		0.0516345	0.0369815	207.247		0.0515082	0.0332502	199.606		0.0521412	0.0334459	192.443
0.0534925	0.0253489	181.999		0.0534959	0.0254228	179		0.0534973	0.022949	173.165		0.0548463	0.0401934	212.158		0.0547509	0.0364929	204.208		0.0554324	0.0367371	196.551
0.0567889	0.0286452	186.043		0.0568258	0.0287528	182.658		0.0567828	0.0262345	176.564		0.0581381	0.0434852	217.218		0.0581178	0.0398599	208.942		0.058846	0.0401507	200.744
0.0602602	0.0321165	190.195		0.0602253	0.0321523	186.415		0.0602109	0.0296627	180.045		0.0615464	0.0468935	222.411		0.0615869	0.043329	213.812		0.062345	0.0436497	205.038
0.0638386	0.035695	194.45		0.0637315	0.0356584	190.274		0.0637367	0.0331884	183.637		0.0651048	0.0504518	227.747		0.0651385	0.0468806	218.824		0.065896	0.0472007	209.431
0.0675008	0.0393572	198.805		0.0673571	0.0392841	194.233		0.0673201	0.0367719	187.333		0.0687893	0.0541364	233.236		0.0687678	0.0505098	223.976		0.0695159	0.0508206	213.924
0.0712003	0.0430566	203.269		0.0710861	0.043013	198.293		0.0709834	0.0404352	191.127		0.072541	0.057888	238.908		0.0725416	0.0542836	229.26		0.0732393	0.054544	218.512
0.0749499	0.0468063	207.838		0.0748866	0.0468136	202.454		0.07476	0.0442118	195.021		0.0763515	0.0616986	244.757		0.0764573	0.0581994	234.691		0.0771203	0.058425	223.209
0.0788018	0.0506581	212.503		0.0788025	0.0507295	206.7		0.0786936	0.0481454	199.021		0.080269	0.0656161	250.786		0.0804966	0.0622386	240.28		0.0811118	0.0624166	228.018
0.0827887	0.0546451	217.272		0.0828533	0.0547802	211.038		0.0827326	0.0521844	203.144		0.0843496	0.0696966	256.983		0.0845513	0.0662933	246.023		0.085162	0.0664667	232.941
0.0869168	0.0587732	222.138		0.0870381	0.0589651	215.485		0.0868115	0.0562632	207.371		0.0885613	0.0739084	263.333		0.0886338	0.0703759	251.905		0.0893178	0.0706225	237.982
0.0910945	0.0629508	227.109		0.0912924	0.0632194	220.037		0.0909573	0.0604091	211.689		0.092842	0.078189	269.838		0.0928428	0.0745848	257.905		0.0936331	0.0749378	243.15
0.0953532	0.0672096	232.199		0.0955817	0.0675087	224.697		0.0952961	0.0647479	216.109		0.0971838	0.0825309	276.494		0.0972209	0.0789629	264.032		0.0981072	0.0794119	248.46
0.0997514	0.0716077	237.433		0.0999546	0.0718816	229.465		0.0998196	0.0692714	220.648		0.10162	0.0869675	283.326		0.101694	0.0834363	270.274		0.102652	0.0839568	253.878
0.104299	0.0761553	242.834		0.104474	0.0764006	234.359		0.104413	0.0738652	225.302		0.106208	0.0915551	290.331		0.106197	0.0879394	276.621		0.107213	0.0885176	259.392
0.108922	0.0807786	248.395		0.10908	0.0810067	239.384		0.108987	0.0784388	230.082		0.11089	0.0962372	297.489		0.110774	0.092516	283.113		0.111845	0.0931498	265.012
0.113609	0.085465	254.102		0.113718	0.0856454	244.512		0.113641	0.0830926	235.033		0.11563	0.100977	304.769		0.115518	0.0972603	289.78		0.116622	0.0979269	270.738
0.11841	0.0902666	259.951		0.118452	0.0903786	249.757		0.118472	0.0879238	240.14		0.120506	0.105853	312.17		0.120359	0.102101	296.596		0.121514	0.102819	276.557
0.123377	0.0952338	265.94		0.123358	0.0952849	255.136		0.123402	0.092854	245.365		0.125553	0.1109	319.715		0.125262	0.107004	303.509		0.126452	0.107757	282.461
0.128455	0.100312	272.053		0.128433	0.10036	260.654		0.128422	0.0978734	250.666		0.130664	0.116011	327.411		0.130313	0.112055	310.531		0.131491	0.112796	288.474
0.133604	0.10546	278.297		0.133547	0.105474	266.278		0.13364	0.103092	256.067		0.135796	0.121143	335.255		0.135565	0.117307	317.705		0.136693	0.117998	294.605
0.13885	0.110707	284.697		0.138728	0.110655	272.032		0.139018	0.10847	261.605		0.141008	0.126355	343.253		0.140913	0.122655	325.058		0.141992	0.123297	300.824
0.144191	0.116048	291.246		0.144103	0.11603	277.939		0.144402	0.113854	267.271		0.146381	0.131728	351.427		0.146242	0.127984	332.593		0.147346	0.128651	307.121
0.149589	0.121445	297.919		0.149572	0.121499	283.993		0.149761	0.119213	273.064		0.151837	0.137184	359.771		0.151659	0.133401	340.338		0.152856	0.134161	313.524
0.155095	0.126951	304.697		0.155055	0.126982	290.182		0.155213	0.124664	278.986		0.157335	0.142682	368.278		0.157231	0.138973	348.268		0.158525	0.139829	320.072
0.160804	0.13266	311.587		0.160652	0.132579	296.492		0.160783	0.130235	285.018		0.162942	0.148289	376.961		0.162885	0.144627	356.321		0.1642	0.145505	326.76
0.166571	0.138427	318.588		0.166419	0.138346	302.941		0.1664	0.135852	291.14		0.168659	0.154006	385.804		0.168714	0.150457	364.475		0.169914	0.151219	333.585
0.172353	0.144209	325.723		0.172275	0.144202	309.527		0.172169	0.141621	297.389		0.174488	0.159835	394.802		0.174749	0.156491	372.748		0.175777	0.157082	340.511
0.17824	0.150097	333.017		0.178234	0.150161	316.267		0.178098	0.14755	303.798		0.180466	0.165813	403.959		0.180816	0.162558	381.186		0.181732	0.163037	347.514
0.184236	0.156093	340.471		0.184334	0.156261	323.148		0.184045	0.153497	310.384		0.186599	0.171946	413.284		0.186831	0.168573	389.788		0.187834	0.169139	354.604
0.190256	0.162113	348.079		0.190436	0.162363	330.183		0.190077	0.159529	317.14		0.192736	0.178083	422.785		0.192898	0.17464	398.524		0.194127	0.175432	361.792
0.196385	0.168241	355.825		0.196538	0.168465	337.355		0.196329	0.165781	324.042		0.198886	0.184233	432.467		0.199061	0.180803	407.382		0.200404	0.181709	369.092
0.202698	0.174555	363.704		0.20282	0.174747	344.652		0.202696	0.172148	331.118		0.205195	0.190542	442.314		0.205312	0.187054	416.39		0.206622	0.187926	376.5
0.209119	0.180976	371.722		0.209191	0.181118	352.107		0.209132	0.178583	338.366		0.211645	0.196992	452.348		0.211776	0.193518	425.537		0.213034	0.194338	384.01
0.215659	0.187516	379.905		0.215617	0.187544	359.732		0.215691	0.185143	345.756		0.218256	0.203603	462.564		0.218314	0.200056	434.845		0.2196	0.200905	391.617
0.222358	0.194214	388.258		0.222201	0.194128	367.5		0.222315	0.191767	353.3		0.22503	0.210377	472.913		0.224872	0.206614	444.334		0.226248	0.207552	399.346
0.229084	0.20094	396.801		0.228836	0.200763	375.415		0.229096	0.198548	360.995		0.231775	0.217122	483.416		0.231642	0.213384	454.011		0.233032	0.214337	407.193
0.235837	0.207693	405.503		0.23563	0.207557	383.507		0.236037	0.205488	368.826		0.238611	0.223958	494.092		0.238556	0.220298	463.889		0.23988	0.221185	415.161
0.24275	0.214607	414.33		0.242698	0.214624	391.794		0.242975	0.212427	376.816		0.245638	0.230986	504.946		0.245522	0.227264	473.949		0.246872	0.228177	423.247
0.249853	0.221709	423.303		0.24978	0.221707	400.302		0.249969	0.219421	384.975		0.252659	0.238007	515.973		0.252601	0.234343	484.164		0.254061	0.235366	431.437
0.257104	0.22896	432.395		0.256845	0.228772	408.993		0.257033	0.226485	393.311		0.259763	0.24511	527.144		0.259756	0.241498	494.553		0.261366	0.242671	439.746
0.264394	0.23625	441.601		0.264021	0.235948	417.832		0.26414	0.233592	401.811		0.26701	0.252357	538.452		0.2671	0.248842	505.113		0.268701	0.250006	448.164
0.271595	0.243452	450.948		0.271413	0.24334	426.839		0.271394	0.240846	410.443		0.274394	0.259741	549.955		0.274577	0.256319	515.822		0.276013	0.257318	456.676
0.278931	0.250788	460.474		0.279085	0.251012	435.999		0.278817	0.248268	419.204		0.28199	0.267337	561.663		0.282049	0.263791	526.695		0.283468	0.264773	465.269
0.28634	0.258197	470.169		0.286723	0.25865	445.303		0.28636	0.255812	428.148		0.289566	0.274913	573.54		0.289585	0.271327	537.736		0.291143	0.272447	473.957
0.293869	0.265726	479.99		0.294248	0.266175	454.78		0.294014	0.263465	437.308		0.297135	0.282482	585.563		0.29719	0.278932	548.951		0.298821	0.280126	482.744
0.301528	0.273385	489.923		0.301838	0.273765	464.473		0.301654	0.271105	446.699		0.304818	0.290166	597.76		0.304852	0.286594	560.318		0.306505	0.287809	491.624
0.309303	0.281159	500.018		0.309544	0.281471	474.382		0.309374	0.278826	456.308		0.312771	0.298118	610.147		0.312679	0.294421	571.804		0.314209	0.295514	500.611
0.317348	0.289204	510.325		0.317438	0.289365	484.451		0.317248	0.2867	466.111		0.320888	0.306235	622.714		0.320641	0.302383	583.444		0.322018	0.303322	509.717
0.325454	0.29731	520.787		0.325353	0.29728	494.651		0.325355	0.294807	476.076		0.328805	0.314152	635.445		0.328719	0.310461	595.285		0.330063	0.311367	518.946
0.333544	0.3054	531.387		0.333416	0.305343	505.062		0.333599	0.303051	486.212		0.336812	0.322159	648.399		0.336822	0.318564	607.326		0.338317	0.319622	528.297
0.341754	0.31361	542.129		0.341688	0.313615	515.734		0.341836	0.311288	496.566		0.344981	0.330328	661.628		0.344968	0.32671	619.589		0.346694	0.327999	537.784
0.350244	0.322101	553.02		0.350066	0.321993	526.628		0.350185	0.319636	507.195		0.35334	0.338687	675.056		0.353269	0.335012	632.052		0.35508	0.336385	547.416
0.35884	0.330697	564.024		0.358498	0.330425	537.735		0.358557	0.328009	518.087		0.361784	0.347131	688.593		0.361813	0.343555	644.647		0.36354	0.344845	557.203
0.367298	0.339154	575.127		0.367073	0.339	549.06		0.367024	0.336475	529.192		0.370314	0.355661	702.249		0.370461	0.352203	657.383		0.372231	0.353535	567.102
0.37579	0.347647	586.423		0.375851	0.347777	560.639		0.375625	0.345077	540.539		0.37911	0.364457	716.067		0.379131	0.360873	670.291		0.381099	0.362404	577.039
0.384412	0.356269	597.93		0.384607	0.356534	572.451		0.384445	0.353897	552.162		0.388038	0.373385	729.974		0.387955	0.369697	683.418		0.389968	0.371273	587.027
0.393176	0.365032	609.563		0.393372	0.365299	584.467		0.393365	0.362817	564.028		0.396909	0.382256	743.93		0.396778	0.37852	696.75		0.39881	0.380114	597.13
0.401939	0.373795	621.271		0.402163	0.37409	596.688		0.402221	0.371672	576.089		0.405827	0.391174	757.979		0.405705	0.387447	710.274		0.40776	0.389064	607.393
0.41098	0.382837	633.139		0.41108	0.383007	609.143		0.411131	0.380583	588.41		0.414813	0.40016	772.284		0.414747	0.396489	724.017		0.416686	0.397991	617.74
0.420247	0.392103	645.207		0.420191	0.392118	621.852		0.420351	0.389803	601.015		0.42367	0.409017	786.867		0.424027	0.405769	737.978		0.425663	0.406968	628.157
0.429508	0.401364	657.428		0.429455	0.401382	634.826		0.429696	0.399148	613.877		0.432484	0.417831	801.628		0.433316	0.415058	752.057		0.434838	0.416143	638.719
0.438789	0.410645	669.797		0.438725	0.410651	648.09		0.43886	0.408311	626.996		0.441409	0.426756	816.546		0.442562	0.424304	766.247		0.444367	0.425672	649.416
0.448334	0.420191	682.394		0.448019	0.419946	661.654		0.448112	0.417564	640.444		0.450822	0.436169	831.679		0.452	0.433742	780.649		0.453877	0.435181	660.178
0.457962	0.429818	695.21		0.457538	0.429465	675.461		0.457584	0.427035	654.204		0.460729	0.446076	847.089		0.461748	0.44349	795.263		0.4633	0.444605	671.005
0.467486	0.439343	708.127		0.467287	0.439214	689.459		0.467186	0.436638	668.168		0.470755	0.456102	862.784		0.471358	0.4531	810.057		0.473081	0.454385	681.944
0.477001	0.448858	721.118		0.477067	0.448994	703.668		0.476877	0.446329	682.286		0.480688	0.466035	878.787		0.480924	0.462667	825.071		0.48318	0.464485	692.97
0.486751	0.458608	734.268		0.486911	0.458838	718.09		0.486825	0.456276	696.595		0.490581	0.475929	895.051		0.490665	0.472407	840.284		0.49309	0.474395	704.06
0.496772	0.468628	747.597		0.496805	0.468732	732.681		0.496939	0.466391	711.109		0.500727	0.486074	911.448		0.500627	0.482369	855.594		0.502865	0.484169	715.203
0.506756	0.478612	761.05		0.506686	0.478613	747.436		0.506908	0.47636	725.783		0.510935	0.496282	927.836		0.510542	0.492284	870.932		0.512719	0.494024	726.413
0.51657	0.488427	774.635		0.51664	0.488567	762.371		0.516857	0.486309	740.636		0.520931	0.506278	944.193		0.52062	0.502362	886.301		0.522617	0.503922	737.622
0.526467	0.498323	788.354		0.526814	0.498741	777.418		0.526835	0.496287	755.684		0.530889	0.516236	960.548		0.530835	0.512577	901.752		0.532518	0.513823	748.784
0.536566	0.508422	802.099		0.536804	0.508731	792.485		0.53673	0.506182	770.852		0.54069	0.526037	976.91		0.54086	0.522602	917.252		0.542581	0.523886	759.912
0.546636	0.518492	815.786		0.546635	0.518562	807.535		0.546473	0.515925	786.018		0.550473	0.535821	993.318		0.550836	0.532578	932.811		0.55266	0.533965	771.04
0.556663	0.528519	829.472		0.556678	0.528605	822.62		0.55631	0.525761	801.266		0.560441	0.545788	1009.75		0.560833	0.542575	948.438		0.562585	0.54389	782.187
0.56677	0.538626	843.156		0.566874	0.538801	837.709		0.566392	0.535843	816.662		0.570562	0.555909	1026.11		0.570763	0.552505	964.095		0.572605	0.55391	793.365
0.576681	0.548537	856.816		0.576783	0.54871	852.756		0.576538	0.545989	832.164		0.580536	0.565883	1042.4		0.580526	0.562268	979.659		0.582685	0.56399	804.581
0.586561	0.558418	870.462		0.586585	0.558512	867.756		0.586536	0.555987	847.763		0.590545	0.575893	1058.65		0.590351	0.572093	995.205		0.592692	0.573997	815.77
0.596664	0.568521	884.1		0.596499	0.568426	882.714		0.596562	0.566013	863.453		0.600824	0.586171	1074.9		0.600406	0.582148	1010.83		0.602603	0.583907	826.874
0.606834	0.578691	897.623		0.606383	0.57831	897.642		0.606808	0.57626	879.17		0.610903	0.596251	1091.16		0.610519	0.592261	1026.54		0.612593	0.593897	837.945
0.616685	0.588542	910.975		0.616218	0.588145	912.569		0.616951	0.586403	894.872		0.620787	0.606134	1107.43		0.620513	0.602255	1042.3		0.622721	0.604025	849.055
0.626597	0.598453	924.238		0.626114	0.598041	927.516		0.626917	0.596369	910.623		0.6307	0.616047	1123.71		0.630525	0.612267	1058.1		0.632819	0.614124	860.183
0.636858	0.608714	937.504		0.635983	0.60791	942.499		0.636915	0.606366	926.44		0.64062	0.625967	1139.93		0.640718	0.62246	1073.92		0.642724	0.624028	871.337
0.64689	0.618746	950.792		0.645852	0.617779	957.517		0.64671	0.616162	942.339		0.650456	0.635803	1156.07		0.650906	0.632648	1089.68		0.652635	0.63394	882.51
0.656638	0.628495	963.942		0.656065	0.627992	972.589		0.656452	0.625904	958.314		0.66051	0.645857	1172.12		0.660916	0.642658	1105.43		0.662728	0.644033	893.649
0.666501	0.638357	976.14		0.666319	0.638246	987.754		0.666461	0.635913	974.374		0.67064	0.655987	1188.13		0.670924	0.652666	1121.2		0.672769	0.654074	904.741
0.676521	0.648378	986.61		0.676406	0.648333	1002.97		0.676602	0.646054	990.472		0.680562	0.665909	1204.11		0.680763	0.662505	1137.02		0.682739	0.664044	915.84
0.686511	0.658367	995.167		0.686282	0.658209	1018.18		0.686561	0.656013	1006.56		0.690534	0.675882	1220.13		0.690525	0.672267	1152.89		0.692736	0.674041	926.966
0.696283	0.66814	1001.89		0.696197	0.668124	1033.45		0.696559	0.666011	1022.68		0.700692	0.686039	1236.23		0.700453	0.682195	1168.85		0.70264	0.683945	938.124
0.702923	0.674779	1006.92		0.706315	0.678242	1048.77		0.706828	0.67628	1038.89		0.710745	0.696093	1252.3		0.710558	0.6923	1184.8		0.712502	0.693806	949.348
0.705222	0.677079	1010.26		0.7165	0.688427	1064.01		0.716969	0.68642	1055.21		0.720599	0.705946	1268.22		0.720512	0.702254	1200.73		0.722563	0.703868	960.61
0.705992	0.677848	1011.9		0.72655	0.698477	1079.15		0.726846	0.696298	1071.63		0.730542	0.715889	1284.03		0.730476	0.712218	1216.65		0.732696	0.714001	971.826
0.707307	0.679163	1009.99		0.736596	0.708523	1094.18		0.736698	0.70615	1088.09		0.740713	0.72606	1299.86		0.740746	0.722488	1232.62		0.742599	0.723904	982.968
0.707656	0.679512	1006.51		0.746836	0.718763	1109.06		0.746622	0.716074	1104.58		0.750825	0.736172	1315.7		0.750923	0.732665	1248.67		0.752584	0.733889	994.087
0.707839	0.679695	1002.31		0.756988	0.728915	1123.8		0.756509	0.725961	1121.09		0.760708	0.746055	1331.5		0.760829	0.742571	1264.81		0.762814	0.744119	1005.24
0.707961	0.679817	998.185		0.766962	0.738889	1138.43		0.76654	0.735992	1137.61		0.770589	0.755936	1347.34		0.770687	0.752429	1281.01		0.772808	0.754113	1016.42
0.708031	0.679888	994.28		0.77687	0.748797	1152.95		0.776624	0.746076	1154.17		0.780671	0.766018	1363.16		0.780601	0.762343	1297.24		0.782643	0.763947	1027.64
0.708072	0.679929	990.516		0.786654	0.758581	1167.41		0.786552	0.756004	1170.83		0.790785	0.776132	1378.86		0.790468	0.77221	1313.47		0.792548	0.773853	1038.87
0.708097	0.679954	986.867		0.796457	0.768384	1181.85		0.796553	0.766005	1187.63		0.800732	0.786079	1394.5		0.800474	0.782216	1329.67		0.802517	0.783821	1050.08
0.708103	0.679959	983.369		0.806504	0.778431	1196.2		0.806666	0.776117	1204.56		0.810737	0.796085	1410.16		0.810603	0.792345	1345.89		0.812476	0.793781	1061.27
0.708109	0.679965	980.01		0.816569	0.788496	1210.39		0.816685	0.786137	1221.55		0.820715	0.806062	1425.84		0.820581	0.802324	1362.15		0.822607	0.803912	1072.41
0.70811	0.679966	976.779		0.826507	0.798434	1224.43		0.826594	0.796045	1238.45		0.830535	0.815882	1441.54		0.830575	0.812317	1378.52		0.832768	0.814073	1083.56
0.708107	0.679963	973.743		0.836647	0.808574	1238.4		0.836571	0.806022	1255.32		0.840486	0.825833	1457.28		0.840705	0.822447	1395.03		0.842718	0.824022	1094.7
0.708103	0.679959	970.86		0.846925	0.818852	1252.29		0.846685	0.816136	1272.23		0.85072	0.836067	1472.98		0.850755	0.832497	1411.6		0.852767	0.834071	1105.88
0.708097	0.679954	968.085		0.856927	0.828853	1266.13		0.8568	0.826252	1289.1		0.86072	0.846067	1488.55		0.860636	0.842378	1428.08		0.862882	0.844186	1117.09
0.708091	0.679948	965.42		0.86681	0.838737	1279.9		0.866729	0.836181	1305.86		0.870563	0.855911	1504.01		0.87056	0.852302	1444.52		0.87285	0.854155	1128.28
0.708086	0.679943	962.86		0.876729	0.848656	1293.59		0.876593	0.846045	1322.56		0.88075	0.866097	1519.46		0.880669	0.862411	1461.02		0.882652	0.863956	1139.39
0.708078	0.679935	960.384		0.886596	0.858523	1307.12		0.886636	0.856088	1339.11		0.89091	0.876257	1534.94		0.890806	0.872548	1477.59		0.892531	0.873836	1150.49
0.708077	0.679934	957.994		0.89648	0.868407	1320.49		0.896627	0.866079	1355.5		0.900723	0.88607	1550.41		0.900756	0.882498	1494.21		0.902597	0.883902	1161.63
0.708068	0.679924	955.683		0.906583	0.87851	1333.74		0.906381	0.875833	1371.9		0.9105	0.895847	1565.87		0.91063	0.892372	1510.93		0.912704	0.894008	1172.79
				0.916624	0.888551	1346.93		0.916122	0.885574	1388.39		0.920487	0.905834	1581.32		0.920665	0.902407	1527.68		0.922668	0.903972	1183.97
				0.92651	0.898437	1360.04		0.925853	0.895305	1404.93		0.930493	0.91584	1596.74		0.930755	0.912497	1544.35		0.93262	0.913925	1195.17
				0.93657	0.908497	1373.17		0.93556	0.905011	1421.51		0.94053	0.925877	1612.04		0.940738	0.92248	1560.97		0.942734	0.924038	1206.38
				0.946695	0.918622	1386.34		0.945705	0.915157	1438.18		0.950652	0.935999	1627.29		0.950764	0.932506	1577.66		0.952826	0.934131	1217.56
				0.956672	0.928599	1399.43		0.956285	0.925737	1454.84		0.960739	0.946086	1642.54		0.960733	0.942475	1594.43		0.962754	0.944059	1228.75
				0.966537	0.938464	1412.35		0.966473	0.935925	1471.48		0.970773	0.95612	1657.8		0.970584	0.952326	1611.28		0.972709	0.954014	1239.95
				0.976554	0.948481	1425.24		0.976411	0.945863	1488.1		0.980826	0.966174	1673.03		0.98045	0.962192	1628.24		0.982587	0.963891	1251.17
				0.986717	0.958644	1438.16		0.98666	0.956112	1504.81		0.990831	0.976178	1688.21		0.990633	0.972376	1645.2		0.99242	0.973725	1262.46
				0.996806	0.968733	1451.05		0.996809	0.966261	1521.59		1.00073	0.986076	1703.26		1.00067	0.982416	1662.07		1.00245	0.98375	1273.8
				1.00671	0.978638	1463.79		1.00662	0.97607	1538.3		1.01059	0.995935	1718.17		1.01054	0.992279	1678.87		1.01258	0.993888	1285.11
				1.01666	0.988587	1475.41		1.01643	0.985885	1554.87		1.02057	1.00592	1733.02		1.02069	1.00243	1695.72		1.02254	1.00385	1296.35
				1.02675	0.998673	1485.07		1.02642	0.995873	1571.34		1.03065	1.016	1747.82		1.03084	1.01258	1712.67		1.03258	1.01389	1307.6
				1.03674	1.00867	1492.65		1.03642	1.00587	1587.71		1.04069	1.02604	1762.56		1.0407	1.02244	1729.73		1.04289	1.0242	1318.87
				1.04621	1.01813	1498.27		1.04649	1.01594	1603.91		1.05059	1.03594	1777.22		1.05053	1.03227	1746.83		1.05301	1.03432	1330.17
				1.05224	1.02417	1502.02		1.05666	1.02611	1620.02		1.06063	1.04597	1791.74		1.06052	1.04226	1763.93		1.06285	1.04415	1341.51
				1.05417	1.0261	1503.96		1.06673	1.03619	1636.09		1.07078	1.05613	1806.1		1.07047	1.05221	1781.03		1.07268	1.05398	1352.88
				1.05495	1.02688	1504.06		1.07679	1.04624	1652.12		1.08082	1.06617	1820.32		1.08052	1.06226	1798.08		1.08261	1.06391	1364.26
				1.05572	1.02765	1502.33		1.08683	1.05629	1668.08		1.09074	1.07609	1834.42		1.09069	1.07243	1815.15		1.09247	1.07377	1375.58
				1.05631	1.02824	1498.78		1.0968	1.06625	1683.93		1.10059	1.08593	1848.36		1.10072	1.08247	1832.25		1.1025	1.08381	1386.86
				1.05666	1.02859	1493.59		1.10668	1.07614	1699.55		1.11045	1.0958	1862.2		1.11071	1.09246	1849.39		1.11264	1.09395	1398.14
				1.05684	1.02877	1487.81		1.11653	1.08598	1715		1.1204	1.10575	1875.93		1.12081	1.10255	1866.57		1.12267	1.10398	1409.47
				1.05696	1.02888	1482.27		1.12653	1.09598	1730.36		1.13054	1.11588	1889.42		1.13087	1.11261	1883.77		1.13274	1.11404	1420.85
				1.05703	1.02895	1477.06		1.13665	1.1061	1745.63		1.14056	1.12591	1902.57		1.14074	1.12248	1900.89		1.14284	1.12415	1432.28
				1.05707	1.029	1472.08		1.14668	1.11613	1760.79		1.15054	1.13589	1915.36		1.15053	1.13227	1917.93		1.15284	1.13415	1443.72
				1.05709	1.02902	1467.3		1.15659	1.12604	1775.82		1.16078	1.14613	1927.79		1.16049	1.14223	1935.01		1.16273	1.14404	1455.06
				1.0571	1.02903	1462.75		1.16666	1.13611	1790.65		1.17096	1.15631	1939.73		1.17059	1.15233	1952.13		1.17266	1.15397	1466.37
				1.05711	1.02903	1458.4		1.17683	1.14628	1805.28		1.18087	1.16622	1951.01		1.18065	1.16239	1969.26		1.18271	1.16402	1477.71
				1.0571	1.02903	1454.25		1.1868	1.15625	1819.75		1.19072	1.17607	1961.47		1.19059	1.17233	1986.41		1.19272	1.17403	1489.11
				1.0571	1.02903	1450.28		1.19671	1.16616	1834.06		1.20067	1.18602	1970.85		1.20065	1.18239	2003.53		1.20257	1.18388	1500.52
				1.0571	1.02902	1446.48		1.20654	1.17599	1848.23		1.21054	1.19589	1978.67		1.2108	1.19254	2020.59		1.21241	1.19371	1511.98
				1.0571	1.02902	1442.84		1.21637	1.18583	1862.28		1.22053	1.20588	1984.45		1.22081	1.20255	2037.62		1.22249	1.2038	1523.44
				1.05709	1.02902	1439.32		1.22639	1.19584	1876.17		1.23066	1.21601	1988.32		1.23079	1.21253	2054.67		1.23263	1.21394	1534.85
								1.23654	1.20599	1889.79		1.24065	1.226	1990.34		1.24064	1.22238	2071.71		1.24265	1.22395	1546.26
								1.24656	1.21601	1903.11		1.26081	1.24615	1987.12		1.25043	1.23217	2088.8		1.25273	1.23403	1557.68
								1.25657	1.22602	1916.14		1.27091	1.25626	1980.66		1.26034	1.24208	2105.96		1.26271	1.24401	1569.15
								1.26681	1.23626	1928.94		1.28081	1.26616	1971.59		1.2705	1.25225	2123.12		1.27264	1.25394	1580.67
								1.27693	1.24639	1941.47		1.29065	1.276	1961.03		1.28056	1.26231	2140.18		1.28268	1.26399	1592.22
								1.28685	1.2563	1953.76		1.30068	1.28603	1949.89		1.29049	1.27223	2157.14		1.2928	1.2741	1603.72
								1.2967	1.26616	1965.23		1.31075	1.29609	1938.9		1.30072	1.28246	2174.12		1.3027	1.284	1615.15
								1.30663	1.27609	1974.73		1.32067	1.30601	1928.72		1.311	1.29274	2191.12		1.31261	1.29391	1626.5
								1.31648	1.28593	1981.75		1.33054	1.31588	1919.55		1.32092	1.30267	2208.14		1.3228	1.3041	1637.89
								1.32647	1.29593	1986.43		1.34058	1.32592	1911.53		1.3307	1.31244	2225.17		1.33283	1.31414	1649.34
								1.33512	1.30458	1989.01		1.35069	1.33604	1905.28		1.34064	1.32238	2242.2		1.34262	1.32393	1660.85
								1.34051	1.30996	1988.26		1.36067	1.34601	1901.49		1.35051	1.33225	2259.18		1.35244	1.33375	1672.4
								1.34129	1.31074	1985.08		1.37073	1.35608	1901.23		1.36043	1.34217	2276.02		1.36244	1.34375	1683.89
								1.34201	1.31146	1980.11		1.38075	1.36609	1903.76		1.37056	1.3523	2292.73		1.37246	1.35376	1695.24
								1.3425	1.31195	1973.32		1.39063	1.37598	1908.18		1.38064	1.36238	2309.28		1.38259	1.3639	1706.39
								1.34276	1.31221	1965.36		1.40059	1.38594	1914.03		1.39066	1.3724	2325.61		1.39279	1.37409	1717.45
								1.34291	1.31237	1957.48		1.41078	1.39612	1920.96		1.40076	1.3825	2341.85		1.40276	1.38407	1728.59
								1.343	1.31245	1950.16		1.4208	1.40614	1928.69		1.41078	1.39252	2358.23		1.41253	1.39383	1739.87
								1.34306	1.31251	1943.32		1.43062	1.41597	1937.06		1.42047	1.40221	2374.62		1.42216	1.40346	1751.24
								1.34309	1.31254	1936.85		1.44075	1.4261	1946.03		1.42988	1.41162	2390.87		1.43173	1.41303	1762.61
								1.3431	1.31256	1930.74		1.45096	1.4363	1955.47		1.43943	1.42117	2407.06		1.44157	1.42288	1773.91
								1.34311	1.31256	1924.97		1.46078	1.44613	1965.26		1.44966	1.43141	2423.25		1.45178	1.43308	1785.18
								1.34311	1.31256	1919.51		1.47053	1.45587	1975.28		1.46011	1.44185	2439.42		1.46207	1.44337	1796.58
								1.34311	1.31256	1914.33		1.48049	1.46583	1985.45		1.47022	1.45196	2455.66		1.47232	1.45362	1808.15
								1.3431	1.31255	1909.41		1.4905	1.47585	1995.66		1.48025	1.46199	2472.01		1.48244	1.46375	1819.89
								1.3431	1.31255	1904.72		1.50055	1.4859	2005.81		1.49039	1.47214	2488.46		1.49245	1.47376	1831.74
								1.3431	1.31255	1900.23		1.51073	1.49607	2015.97		1.50047	1.48222	2504.89		1.50263	1.48393	1843.53
								1.34309	1.31254	1895.93		1.52087	1.50622	2026.2		1.5106	1.49234	2521.14		1.51289	1.4942	1855.18
								1.34308	1.31253	1891.8		1.53086	1.51621	2036.49		1.52068	1.50243	2537.22		1.52294	1.50424	1866.77
								1.34307	1.31253	1887.83		1.5408	1.52615	2046.83		1.53058	1.51233	2553.22		1.53286	1.51417	1878.35
												1.55071	1.53606	2057.19		1.5405	1.52224	2569.22		1.5427	1.52401	1889.93
												1.56063	1.54598	2067.51		1.55069	1.53243	2585.11		1.55254	1.53384	1901.56
												1.57046	1.5558	2077.75		1.56075	1.54249	2600.77		1.56247	1.54378	1913.24
												1.58037	1.56572	2088		1.5706	1.55234	2616.17		1.57253	1.55384	1924.87
												1.59045	1.57579	2098.34		1.58068	1.56242	2631.47		1.58251	1.56382	1936.45
												1.60056	1.5859	2108.74		1.59092	1.57266	2646.76		1.59252	1.57383	1948.02
												1.61056	1.59591	2119.14		1.60077	1.58251	2662		1.6028	1.5841	1959.6
												1.6206	1.60594	2129.49		1.61048	1.59222	2677.16		1.61295	1.59426	1971.2
												1.63084	1.61618	2139.77		1.62043	1.60217	2692.21		1.62285	1.60415	1982.85
												1.64098	1.62632	2150.01		1.63046	1.6122	2707.09		1.63273	1.61404	1994.54
												1.65095	1.63629	2160.21		1.64049	1.62223	2721.69		1.64263	1.62394	2006.21
												1.6608	1.64615	2170.39		1.65065	1.63239	2736.08		1.65242	1.63373	2017.83
												1.67059	1.65594	2180.61		1.66083	1.64257	2750.38		1.66244	1.64375	2029.4
												1.68048	1.66583	2190.89		1.67085	1.6526	2764.6		1.67263	1.65393	2040.97
												1.69054	1.67589	2201.16		1.68082	1.66257	2778.73		1.68259	1.66389	2052.54
												1.70053	1.68588	2211.39		1.69071	1.67245	2792.74		1.69252	1.67382	2064.16
												1.71049	1.69584	2221.63		1.70058	1.68232	2806.53		1.70267	1.68397	2075.91
												1.72065	1.706	2231.94		1.7104	1.69214	2820.07		1.71275	1.69405	2087.7
												1.73089	1.71623	2242.28		1.72032	1.70206	2833.45		1.72262	1.70392	2099.39
												1.74085	1.7262	2252.71		1.73044	1.71218	2846.76		1.73251	1.71381	2111
												1.75077	1.73611	2263.26		1.74059	1.72233	2860.02		1.74264	1.72395	2122.65
												1.76069	1.74604	2273.85		1.75056	1.73231	2873.16		1.75282	1.73412	2134.3
												1.7705	1.75585	2284.41		1.76058	1.74232	2886.08		1.76277	1.74408	2145.94
												1.78042	1.76577	2294.94		1.77081	1.75255	2898.74		1.77264	1.75395	2157.62
												1.79059	1.77594	2305.45		1.78099	1.76273	2911.18		1.78267	1.76397	2169.33
												1.80065	1.78599	2315.97		1.79097	1.77271	2923.43		1.79276	1.77406	2180.96
												1.81053	1.79587	2326.5		1.8008	1.78254	2935.5		1.80269	1.78399	2192.51
												1.82063	1.80598	2337.14		1.81057	1.79231	2947.45		1.8127	1.794	2204.08
												1.83076	1.81611	2347.85		1.82044	1.80218	2959.31		1.82272	1.80403	2215.7
												1.84068	1.82603	2358.45		1.83052	1.81226	2971.02		1.83256	1.81387	2227.35
												1.85055	1.8359	2368.85		1.84055	1.82229	2982.45		1.84244	1.82374	2239.09
												1.86063	1.84598	2379.23		1.85048	1.83222	2993.7		1.85262	1.83392	2250.83
												1.87082	1.85617	2389.61		1.86061	1.84235	3004.84		1.86267	1.84398	2262.48
												1.88085	1.8662	2399.94		1.8709	1.85264	3015.88		1.87252	1.85383	2274.02
												1.89071	1.87606	2410.28		1.88088	1.86262	3026.8		1.88269	1.86399	2285.57
												1.90069	1.88604	2420.63		1.89076	1.8725	3037.62		1.89292	1.87422	2297.19
												1.91076	1.89611	2430.88		1.90068	1.88243	3048.34		1.90275	1.88406	2308.87
												1.9207	1.90605	2440.95		1.91051	1.89225	3058.87		1.91249	1.89379	2320.56
												1.93067	1.91602	2450.96		1.92039	1.90213	3069.16		1.92247	1.90377	2332.24
												1.94074	1.92609	2461		1.93051	1.91225	3079.27		1.93249	1.9138	2343.9
												1.95068	1.93603	2471.05		1.94061	1.92235	3089.24		1.94252	1.92383	2355.47
												1.9605	1.94585	2481.1		1.95057	1.93231	3099.08		1.95268	1.93398	2367.02
												1.97058	1.95593	2491.12		1.96068	1.94242	3108.9		1.96277	1.94408	2378.6
												1.98072	1.96607	2500.99		1.97075	1.95249	3118.67		1.97279	1.95409	2390.23
												1.99061	1.97595	2510.63		1.98066	1.9624	3128.21		1.98283	1.96414	2401.88
												2.00061	1.98596	2520.16		1.99048	1.97222	3137.41		1.99284	1.97415	2413.52
												2.01088	1.99623	2529.71		2.00054	1.98228	3146.38		2.00274	1.98405	2425.09
												2.0208	2.00615	2539.29		2.01077	1.99251	3155.14		2.01259	1.99389	2436.6
												2.03051	2.01586	2548.84		2.02084	2.00259	3163.7		2.02254	2.00384	2448.1
												2.04042	2.02576	2558.37		2.03071	2.01245	3172.1		2.03262	2.01392	2459.66
												2.05047	2.03581	2567.87		2.04065	2.02239	3180.36		2.04269	2.024	2471.24
												2.06046	2.04581	2577.26		2.05071	2.03245	3188.37		2.0526	2.03391	2482.83
												2.07057	2.05592	2586.57		2.06069	2.04244	3196.04		2.06262	2.04392	2494.4
												2.08076	2.06611	2595.91		2.07068	2.05242	3203.52		2.07281	2.05411	2505.92
												2.09082	2.07616	2605.29		2.08074	2.06249	3210.89		2.08286	2.06417	2517.41
												2.10088	2.08623	2614.69		2.09063	2.07237	3218.14		2.09276	2.07406	2528.89
												2.11088	2.09622	2624.09		2.10043	2.08217	3225.31		2.1026	2.0839	2540.38
												2.12081	2.10615	2633.43		2.11053	2.09227	3232.4		2.11246	2.09376	2551.9
												2.13064	2.11599	2642.65		2.12075	2.1025	3239.26		2.12238	2.10368	2563.47
												2.14053	2.12588	2651.82		2.13066	2.11241	3245.71		2.1325	2.1138	2575.01
												2.15056	2.13591	2660.99		2.14062	2.12236	3251.87		2.14257	2.12387	2586.46
												2.16066	2.14601	2670.17		2.15089	2.13263	3257.91		2.15257	2.13387	2597.87
												2.17066	2.15601	2679.37		2.16087	2.14261	3263.85		2.16275	2.14406	2609.29
												2.18061	2.16595	2688.51		2.1706	2.15234	3269.65		2.17297	2.15427	2620.7
												2.19073	2.17607	2697.58		2.18045	2.16219	3275.33		2.18289	2.1642	2632.13
												2.20085	2.18619	2706.58		2.19044	2.17218	3280.92		2.19273	2.17404	2643.59
												2.21081	2.19615	2715.56		2.20044	2.18219	3286.4		2.20268	2.18398	2655.03
												2.22067	2.20601	2724.49		2.21055	2.1923	3291.76		2.21255	2.19386	2666.4
												2.23048	2.21583	2733.4		2.22075	2.20249	3297.13		2.22249	2.2038	2677.7
												2.24039	2.22574	2742.37		2.2308	2.21254	3302.66		2.23263	2.21394	2688.97
												2.25046	2.23581	2751.34		2.24088	2.22262	3308.32		2.24269	2.22399	2700.21
												2.26053	2.24588	2760.19		2.25089	2.23263	3314.06		2.25263	2.23394	2711.44
												2.27051	2.25586	2768.91		2.26084	2.24258	3319.8		2.26276	2.24406	2722.73
												2.28061	2.26596	2777.61		2.27071	2.25245	3325.48		2.27288	2.25419	2734.04
												2.29092	2.27626	2786.28		2.2806	2.26234	3330.97		2.28278	2.26409	2745.25
												2.30095	2.2863	2794.93		2.29061	2.27235	3336.51		2.29256	2.27387	2756.34
												2.31082	2.29616	2803.6		2.3007	2.28244	3342.1		2.30257	2.28387	2767.43
												2.32072	2.30606	2812.26		2.31068	2.29242	3347.74		2.3127	2.294	2778.53
												2.33062	2.31597	2820.85		2.32062	2.30236	3353.38		2.32262	2.30392	2789.6
												2.34048	2.32583	2829.31		2.33077	2.31251	3359		2.33244	2.31375	2800.68
												2.35057	2.33591	2837.69		2.34088	2.32262	3364.6		2.34247	2.32378	2811.78
												2.3607	2.34605	2846.05		2.35079	2.33253	3370.22		2.3526	2.3339	2822.82
												2.37067	2.35601	2854.39		2.36065	2.34239	3375.86		2.36259	2.3439	2833.77
												2.38075	2.36609	2862.8		2.37052	2.35226	3381.58		2.37262	2.35392	2844.72
												2.39087	2.37622	2871.28		2.38044	2.36218	3387.57		2.38269	2.364	2855.69
												2.40082	2.38616	2879.72		2.39048	2.37223	3393.63		2.3926	2.37391	2866.67
												2.41061	2.39595	2887.99		2.40058	2.38232	3399.61		2.40251	2.38382	2877.66
												2.42055	2.4059	2896.19		2.41055	2.39229	3405.51		2.41272	2.39403	2888.64
												2.43067	2.41602	2904.41		2.42061	2.40235	3411.4		2.42282	2.40413	2899.51
												2.4407	2.42605	2912.6		2.4309	2.41264	3417.29		2.43266	2.41396	2910.23
												2.45057	2.43592	2920.78		2.44095	2.42269	3423.19		2.44271	2.42402	2920.9
												2.46051	2.44586	2928.97		2.45083	2.43257	3429.15		2.45294	2.43425	2931.59
												2.4706	2.45595	2937.1		2.4607	2.44244	3435.14		2.46284	2.44415	2942.3
												2.48065	2.466	2945.08		2.4706	2.45234	3441.08		2.47258	2.45388	2953.01
												2.49064	2.47598	2952.98		2.48047	2.46222	3446.93		2.48249	2.4638	2963.73
												2.50073	2.48608	2960.88		2.49057	2.47231	3452.73		2.4925	2.4738	2974.38
												2.51069	2.49603	2968.79		2.50072	2.48247	3458.52		2.5025	2.4838	2984.93
												2.52054	2.50589	2976.53		2.5107	2.49244	3464.31		2.51264	2.49395	2995.41
												2.53064	2.51598	2983.13		2.52076	2.50251	3470.15		2.52281	2.50412	3005.9
												2.5408	2.52615	2987.65		2.5309	2.51265	3476.09		2.53286	2.51416	3016.41
												2.55073	2.53607	2989.94		2.54087	2.52261	3482		2.54283	2.52413	3026.93
												2.56697	2.55232	2988.65		2.55065	2.5324	3487.78		2.55274	2.53405	3037.46
												2.56932	2.55467	2985.26		2.56056	2.5423	3493.52		2.56266	2.54397	3047.91
												2.57008	2.55543	2980.03		2.57064	2.55238	3499.32		2.57249	2.5538	3058.24
												2.57077	2.55611	2973.04		2.58065	2.56239	3505.15		2.58236	2.56367	3068.49
												2.57132	2.55667	2964.37		2.59053	2.57227	3511.01		2.59242	2.57372	3078.77
												2.57166	2.55701	2954.17		2.60048	2.58223	3516.95		2.60257	2.58388	3089.07
												2.57186	2.55721	2943.47		2.61059	2.59234	3522.91		2.6126	2.5939	3099.32
												2.57197	2.55732	2933.24		2.62066	2.6024	3528.8		2.62261	2.60391	3109.49
												2.57204	2.55739	2923.66		2.63064	2.61238	3534.68		2.63282	2.61412	3119.55
												2.57208	2.55743	2914.57		2.64074	2.62249	3540.6		2.64301	2.62431	3129.52
												2.5721	2.55745	2905.93		2.65071	2.63245	3546.56		2.65297	2.63428	3139.42
												2.57211	2.55746	2897.71		2.66055	2.64229	3552.55		2.66281	2.64411	3149.23
																2.6706	2.65234	3558.58		2.6726	2.65391	3159
																2.68077	2.66251	3564.55		2.68247	2.66378	3168.77
																2.69071	2.67246	3570.38		2.69253	2.67383	3178.44
																2.70063	2.68237	3576.13		2.70258	2.68388	3187.97
																2.71083	2.69257	3581.92		2.71254	2.69385	3197.4
																2.72088	2.70263	3587.75		2.72269	2.70399	3206.79
																2.73066	2.7124	3593.61		2.73293	2.71423	3216.13
																2.74048	2.72223	3599.47		2.74285	2.72416	3225.44
																2.75051	2.73225	3605.29		2.75275	2.73405	3234.75
																2.76053	2.74228	3611.02		2.76265	2.74396	3244.04
																2.77062	2.75236	3616.62		2.77249	2.7538	3253.24
																2.78077	2.76251	3622.2		2.78239	2.7637	3262.35
																2.7908	2.77255	3627.78		2.79253	2.77384	3271.42
																2.80082	2.78256	3633.37		2.80263	2.78394	3280.46
																2.81077	2.79252	3638.96		2.81253	2.79383	3289.49
																2.8207	2.80245	3644.5		2.82261	2.80392	3298.59
																2.83056	2.8123	3649.92		2.83276	2.81406	3307.76
																2.84039	2.82213	3655.23		2.8427	2.82401	3316.88
																2.85039	2.83213	3660.54		2.85252	2.83382	3325.84
																2.86056	2.8423	3665.87		2.86255	2.84385	3334.76
																2.87066	2.85241	3671.17		2.87274	2.85404	3343.68
																2.88065	2.86239	3676.42		2.88278	2.86409	3352.54
																2.89078	2.87252	3681.58		2.89268	2.87398	3361.37
																2.901	2.88275	3686.67		2.90265	2.88396	3370.18
																2.91101	2.89275	3691.73		2.91278	2.89408	3378.9
																2.92087	2.90261	3696.76		2.92278	2.90409	3387.44
																2.93065	2.91239	3701.81		2.9327	2.914	3395.88
																2.94049	2.92223	3706.93		2.94274	2.92404	3404.31
																2.95049	2.93223	3712.13		2.95266	2.93396	3412.72
																2.96058	2.94233	3717.26		2.96246	2.94376	3421.13
																2.97056	2.9523	3722.33		2.9725	2.95381	3429.53
																2.98057	2.96231	3727.42		2.98265	2.96396	3437.84
																2.99083	2.97258	3732.54		2.99259	2.9739	3445.97
																3.00092	2.98266	3737.64		3.00257	2.98388	3454.01
																3.01081	2.99255	3742.74		3.01288	2.99419	3462.07
																3.02072	3.00247	3747.84		3.0229	3.0042	3470.14
																3.03065	3.01239	3752.87		3.03256	3.01386	3478.16
																3.04046	3.0222	3757.76		3.04238	3.02369	3486.12
																3.05049	3.03223	3762.55		3.05242	3.03372	3494
																3.06064	3.04238	3767.31		3.06247	3.04377	3501.75
																3.07059	3.05233	3772.04		3.07257	3.05387	3509.36
																3.08057	3.06231	3776.82		3.08272	3.06403	3516.92
																3.09071	3.07246	3781.72		3.09276	3.07407	3524.49
																3.10076	3.08251	3786.63		3.10281	3.08412	3532.01
																3.11061	3.09235	3791.4		3.11281	3.09412	3539.44
																3.12055	3.10229	3796.09		3.12277	3.10408	3546.78
																3.13072	3.11246	3800.84		3.13267	3.11398	3553.98
																3.14086	3.1226	3805.6		3.14257	3.12388	3561.06
																3.15076	3.1325	3810.36		3.15257	3.13387	3568.08
																3.16061	3.14236	3815.19		3.16266	3.14396	3575.06
																3.17068	3.15243	3820.01		3.17269	3.15399	3581.98
																3.18076	3.1625	3824.69		3.18262	3.16393	3588.79
																3.19067	3.17241	3829.26		3.19271	3.17401	3595.48
																3.20071	3.18245	3833.86		3.20287	3.18417	3602.05
																3.21073	3.19247	3838.5		3.21283	3.19414	3608.57
																3.22057	3.20231	3843.16		3.22269	3.20399	3614.99
																3.23048	3.21223	3847.88		3.23253	3.21383	3621.34
																3.24069	3.22243	3852.6		3.24244	3.22374	3627.68
																3.25075	3.23249	3857.2		3.25248	3.23379	3633.98
																3.26058	3.24233	3861.68		3.26256	3.24386	3640.11
																3.27076	3.2525	3866.2		3.27251	3.25382	3646.09
																3.28092	3.26266	3870.83		3.2826	3.2639	3651.99
																3.29069	3.27244	3875.53		3.29291	3.27421	3657.8
																3.30043	3.28217	3880.26		3.30294	3.28425	3663.52
																3.31044	3.29218	3885.01		3.31282	3.29412	3669.18
																3.32044	3.30218	3889.75		3.32269	3.30399	3674.79
																3.33049	3.31224	3894.42		3.33261	3.31392	3680.26
																3.34069	3.32243	3899.1		3.34251	3.32381	3685.58
																3.3508	3.33254	3903.86		3.35256	3.33386	3690.76
																3.36081	3.34256	3908.69		3.3627	3.344	3695.86
																3.37086	3.3526	3913.55		3.37266	3.35396	3700.85
																3.38088	3.36262	3918.43		3.38271	3.36402	3705.81
																3.39079	3.37253	3923.27		3.39288	3.37418	3710.73
																3.40065	3.38239	3928.06		3.40286	3.38416	3715.53
																3.41056	3.3923	3932.88		3.41264	3.39395	3720.13
																3.4206	3.40234	3937.82		3.42254	3.40385	3724.6
																3.43069	3.41243	3942.84		3.43266	3.41397	3729.02
																3.44062	3.42236	3947.89		3.4427	3.42401	3733.34
																3.45061	3.43235	3952.9		3.45258	3.43389	3737.58
																3.46077	3.44251	3957.9		3.4625	3.44381	3741.77
																3.47086	3.4526	3962.94		3.47259	3.4539	3745.88
																3.4808	3.46254	3968		3.48268	3.46398	3749.82
																3.49063	3.47237	3973.09		3.49265	3.47395	3753.63
																3.50048	3.48222	3978.25		3.50273	3.48403	3757.36
																3.51044	3.49218	3983.51		3.51272	3.49402	3760.98
																3.52056	3.50231	3988.3		3.52255	3.50385	3732.39
																3.53058	3.51232	3991.51
																3.54052	3.52226	3992.76
																3.55073	3.53247	3992.19
																3.55973	3.54148	3989.9
																3.56421	3.54595	3985.86
																3.56558	3.54732	3980.13
																3.56636	3.5481	3972.8
																3.56704	3.54878	3963.87
																3.5675	3.54925	3953.36
																3.56776	3.5495	3941.81
																3.56791	3.54966	3930.39
																3.568	3.54975	3919.58
																3.56807	3.54981	3909.36
																3.56809	3.54984	3899.63
																3.56811	3.54985	3890.38
																3.56812	3.54986	3881.57
																3.56812	3.54986	3873.17
																3.56812	3.54986	3865.15
																3.56811	3.54986	3857.48
																3.56811	3.54985	3850.12
																3.5681	3.54985	3843.07
																3.5681	3.54984	3836.29
																3.56809	3.54984	3829.76
																3.56808	3.54983	3823.46

## Sheet: BH 4
BH 4 (1000 N)				BH 4 (1500 N)				BH 4 (2000 N)				BH 4 (3000 N)
Standard travel	Displacement corrected	Standard force		Standard travel	Displacement corrected	Standard force		Standard travel	Displacement corrected	Standard force		Standard travel	Displacement corrected	Standard force
mm	mm	N		mm	mm	N		mm	mm	N		mm	mm	N
0	-0.0588673	107.047		0	-0.0458172	118.682		0	-0.0429604	123.436		0	-0.034563	128.775
1.12653e-06	-0.0588662	105.903		-7.51019e-07	-0.045818	117.526		2.31743e-06	-0.042958	122.292		-6.26564e-06	-0.0345693	127.669
5.68628e-07	-0.0588668	104.87		-5.81503e-06	-0.045823	116.506		-2.67148e-06	-0.042963	121.262		-5.01037e-06	-0.034568	126.646
2.34962e-06	-0.058865	103.746		-5.38588e-06	-0.0458226	115.409		-3.26157e-06	-0.0429636	120.174		-5.23567e-06	-0.0345682	125.564
8.58308e-08	-0.0588673	102.706		-2.13504e-06	-0.0458194	114.301		-6.29783e-06	-0.0429667	119.161		-9.80616e-06	-0.0345728	124.454
2.99335e-06	-0.0588643	101.589		-3.4976e-06	-0.0458207	113.275		-3.56197e-06	-0.0429639	118.132		1.09541e-05	-0.0345521	123.444
0.00343942	-0.0554279	102.797		0.00265771	-0.0431595	113.707		0.0019855	-0.0409749	118.072		0.00341447	-0.0311485	124.64
0.00532476	-0.0535426	104.302		0.00432778	-0.0414894	114.847		0.00434481	-0.0386155	119.633		0.00529849	-0.0292645	125.99
0.00758049	-0.0512869	106.307		0.00638796	-0.0394293	116.501		0.00644638	-0.036514	121.299		0.00757982	-0.0269832	127.829
0.00885221	-0.0500151	107.457		0.00756505	-0.0382522	117.515		0.00761239	-0.035348	122.313		0.00885882	-0.0257042	128.919
0.0102234	-0.048644	108.688		0.00884701	-0.0369702	118.638		0.00887057	-0.0340898	123.425		0.0102332	-0.0243298	130.11
0.0117139	-0.0471534	109.991		0.0102316	-0.0355857	119.867		0.0102326	-0.0327277	124.624		0.0117211	-0.0228419	131.38
0.0132868	-0.0455805	111.361		0.0117301	-0.0340871	121.18		0.0117098	-0.0312506	125.904		0.0132861	-0.0212769	132.729
0.0149509	-0.0439165	112.813		0.0133086	-0.0325087	122.566		0.0132779	-0.0296825	127.252		0.0149605	-0.0196025	134.152
0.0167269	-0.0421405	114.357		0.0149849	-0.0308323	124.035		0.0149437	-0.0280167	128.669		0.0167295	-0.0178335	135.655
0.0186236	-0.0402437	115.981		0.0167542	-0.029063	125.581		0.0167231	-0.0262372	130.152		0.0185993	-0.0159637	137.235
0.0206191	-0.0382483	117.692		0.0186255	-0.0271918	127.21		0.0186067	-0.0243537	131.697		0.0205743	-0.0139887	138.894
0.022724	-0.0361433	119.503		0.0205743	-0.025243	128.919		0.0205939	-0.0223665	133.317		0.022642	-0.011921	140.621
0.0249308	-0.0339366	121.414		0.0226351	-0.0231821	130.715		0.0226886	-0.0202717	134.991		0.0248323	-0.00973074	142.407
0.027215	-0.0316524	123.428		0.0248086	-0.0210087	132.594		0.0248755	-0.0180848	136.733		0.0271201	-0.00744295	144.25
0.0296056	-0.0292617	125.547		0.0270852	-0.018732	134.559		0.0271429	-0.0158175	138.553		0.0295275	-0.0050355	146.166
0.0320925	-0.0267748	127.769		0.0294647	-0.0163525	136.596		0.0294876	-0.0134728	140.448		0.0320108	-0.00255222	148.156
0.0346711	-0.0241962	130.087		0.031952	-0.0138652	138.72		0.0319546	-0.0110058	142.42		0.034563	0	150.218
0.037329	-0.0215384	132.487		0.0345309	-0.0112863	140.936		0.03454	-0.00842041	144.475		0.0372233	0.00266026	152.351
0.0401066	-0.0187608	134.96		0.0371776	-0.00863958	143.234		0.0372241	-0.00573625	146.604		0.0400196	0.00545662	154.545
0.042999	-0.0158684	137.513		0.039937	-0.00588023	145.622		0.0400305	-0.00292984	148.811		0.0429397	0.00837673	156.798
0.0459842	-0.0128831	140.142		0.0428147	-0.00300254	148.091		0.0429604	0	151.107		0.0459714	0.0114084	159.116
0.0490472	-0.00982015	142.841		0.0458172	0	150.635		0.0459662	0.00300582	153.488		0.0490939	0.0145309	161.509
0.0522072	-0.00666015	145.612		0.0489405	0.00312327	153.247		0.0490105	0.00605013	155.974		0.0522489	0.0176859	163.985
0.0554786	-0.00338877	148.459		0.0521607	0.00634352	155.938		0.052148	0.00918767	158.55		0.0554848	0.0209218	166.543
0.0588673	0	151.377		0.0554511	0.00963391	158.709		0.0553817	0.0124214	161.221		0.0588476	0.0242846	169.171
0.0623994	0.00353201	154.371		0.0588181	0.0130009	161.573		0.0587619	0.0158016	163.995		0.062335	0.027772	171.874
0.0659996	0.00713222	157.437		0.0622831	0.0164659	164.515		0.0622538	0.0192934	166.874		0.0659168	0.0313538	174.651
0.0696621	0.0107948	160.586		0.0658522	0.020035	167.543		0.0658349	0.0228745	169.86		0.069587	0.035024	177.522
0.0733809	0.0145136	163.812		0.0695465	0.0237293	170.66		0.069504	0.0265437	172.952		0.0733546	0.0387916	180.498
0.0772298	0.0183625	167.114		0.0733559	0.0275387	173.868		0.0732731	0.0303127	176.139		0.0771946	0.0426316	183.571
0.0812163	0.0223489	170.506		0.0772561	0.0314389	177.172		0.077222	0.0342616	179.411		0.0811344	0.0465714	186.734
0.0852904	0.026423	173.997		0.0812491	0.0354319	180.567		0.0813214	0.038361	182.778		0.0852353	0.0506723	189.994
0.0893986	0.0305313	177.583		0.0853708	0.0395536	184.062		0.0854811	0.0425207	186.24		0.0894554	0.0548924	193.356
0.0936012	0.0347338	181.266		0.089621	0.0438038	187.659		0.0896336	0.0466732	189.801		0.0937321	0.0591691	196.805
0.0979463	0.039079	185.047		0.0939525	0.0481353	191.367		0.0938341	0.0508737	193.458		0.0980893	0.0635263	200.335
0.102445	0.0435774	188.924		0.0983016	0.0524844	195.17		0.0981891	0.0552287	197.216		0.102607	0.0680441	203.948
0.107026	0.0481587	192.898		0.102716	0.0568985	199.062		0.102671	0.0597107	201.065		0.107252	0.0726887	207.656
0.111671	0.0528033	196.959		0.107265	0.0614475	203.049		0.107195	0.0642346	204.988		0.111923	0.0773603	211.443
0.116461	0.0575935	201.12		0.111949	0.0661321	207.133		0.111804	0.0688438	209.01		0.116646	0.0820828	215.308
0.121401	0.0625336	205.392		0.116692	0.0708747	211.313		0.116582	0.073622	213.164		0.121475	0.0869116	219.273
0.126425	0.0675574	209.763		0.121466	0.0756485	215.589		0.121473	0.0785127	217.47		0.126445	0.0918816	223.357
0.131495	0.0726273	214.218		0.126384	0.0805669	220.003		0.126393	0.0834326	221.903		0.131518	0.0969552	227.538
0.136667	0.0777994	218.761		0.131446	0.0856292	224.54		0.131402	0.0884413	226.455		0.136688	0.102125	231.828
0.141991	0.0831237	223.402		0.136597	0.0907794	229.179		0.136604	0.0936438	231.126		0.142024	0.107461	236.249
0.147434	0.088567	228.139		0.14183	0.0960132	233.912		0.14194	0.0989797	235.91		0.147489	0.112926	240.804
0.152981	0.094114	232.975		0.147269	0.101452	238.768		0.147313	0.104353	240.814		0.15295	0.118387	245.486
0.158627	0.0997592	237.936		0.152851	0.107034	243.779		0.152759	0.109798	245.852		0.158476	0.123913	250.295
0.164349	0.105482	243.01		0.158391	0.112574	248.952		0.158346	0.115385	251.031		0.164129	0.129566	255.23
0.170086	0.111218	248.176		0.163998	0.118181	254.275		0.16401	0.12105	256.317		0.16987	0.135307	260.299
0.175901	0.117034	253.433		0.169757	0.12394	259.723		0.169787	0.126826	261.711		0.175697	0.141134	265.519
0.181885	0.123018	258.798		0.175626	0.129809	265.274		0.17578	0.132819	267.21		0.181679	0.147116	270.87
0.187924	0.129057	264.299		0.181721	0.135904	270.916		0.181814	0.138854	272.824		0.187756	0.153193	276.347
0.193964	0.135097	269.951		0.188011	0.142194	276.674		0.187842	0.144882	278.572		0.193895	0.159332	281.95
0.20013	0.141262	275.731		0.19426	0.148442	282.556		0.193997	0.151037	284.469		0.200244	0.165681	287.694
0.206472	0.147605	281.639		0.200441	0.154624	288.571		0.200287	0.157327	290.512		0.206713	0.17215	293.593
0.212965	0.154098	287.698		0.206727	0.160909	294.689		0.206627	0.163666	296.684		0.213124	0.178561	299.657
0.219648	0.160781	293.927		0.21314	0.167323	300.915		0.213076	0.170116	302.972		0.219635	0.185072	305.855
0.226353	0.167486	300.357		0.219674	0.173857	307.266		0.219681	0.176721	309.371		0.226295	0.191732	312.176
0.233061	0.174194	306.978		0.226355	0.180538	313.75		0.226386	0.183426	315.906		0.233119	0.198556	318.624
0.239879	0.181012	313.748		0.233044	0.187226	320.375		0.233231	0.190271	322.579		0.240131	0.205568	325.189
0.246915	0.188048	320.668		0.23986	0.194042	327.169		0.240141	0.197181	329.397		0.247115	0.212552	331.88
0.25421	0.195343	327.733		0.246895	0.201078	334.129		0.24703	0.204069	336.372		0.2541	0.219537	338.704
0.261558	0.202691	334.936		0.254014	0.208197	341.254		0.254015	0.211055	343.489		0.261219	0.226656	345.673
0.268768	0.209901	342.28		0.261194	0.215376	348.541		0.261195	0.218235	350.76		0.268433	0.23387	352.807
0.276025	0.217157	349.791		0.268423	0.222606	355.983		0.268563	0.225603	358.187		0.275816	0.241253	360.085
0.283415	0.224548	357.487		0.275842	0.230025	363.607		0.276021	0.23306	365.752		0.283239	0.248676	367.476
0.290973	0.232106	365.333		0.283406	0.237589	371.408		0.283473	0.240512	373.464		0.29078	0.256217	374.999
0.298578	0.239711	373.298		0.290994	0.245176	379.39		0.291023	0.248063	381.359		0.298571	0.264008	382.719
0.306238	0.24737	381.417		0.29866	0.252843	387.55		0.298658	0.255697	389.469		0.306468	0.271905	390.643
0.314141	0.255273	389.745		0.306402	0.260585	395.893		0.306354	0.263394	397.752		0.314357	0.279794	398.723
0.322164	0.263297	398.267		0.314219	0.268402	404.397		0.314194	0.271234	406.192		0.322254	0.287691	406.948
0.330257	0.27139	406.94		0.322222	0.276405	413.051		0.322133	0.279173	414.817		0.330396	0.295833	415.357
0.338423	0.279556	415.778		0.330371	0.284554	421.871		0.330311	0.287351	423.665		0.338721	0.304158	423.965
0.346777	0.28791	424.821		0.33864	0.292823	430.881		0.338538	0.295578	432.679		0.34701	0.312447	432.749
0.355236	0.296369	434.078		0.346898	0.301081	440.096		0.346755	0.303795	441.829		0.35526	0.320697	441.717
0.363692	0.304825	443.497		0.355167	0.30935	449.523		0.355083	0.312123	451.165		0.36356	0.328997	450.873
0.372222	0.313355	453.06		0.363593	0.317776	459.148		0.363687	0.320726	460.706		0.372071	0.337508	460.236
0.380868	0.322001	462.764		0.372242	0.326425	468.904		0.372393	0.329433	470.436		0.380813	0.34625	469.797
0.389658	0.33079	472.618		0.381001	0.335184	478.791		0.380961	0.338001	480.317		0.389691	0.355128	479.558
0.398623	0.339756	482.625		0.389751	0.343934	488.839		0.389612	0.346651	490.417		0.398573	0.36401	489.522
0.407666	0.348799	492.809		0.398643	0.352826	499.118		0.398437	0.355477	500.76		0.407474	0.372911	499.715
0.4167	0.357832	503.204		0.407545	0.361728	509.61		0.407419	0.364459	511.259		0.416611	0.382048	510.126
0.425768	0.366901	513.813		0.416531	0.370714	520.289		0.416446	0.373486	521.877		0.425938	0.391375	520.681
0.435046	0.376179	524.577		0.425631	0.379814	531.19		0.425674	0.382714	532.709		0.435261	0.400698	531.375
0.444519	0.385652	535.421		0.435013	0.389196	542.3		0.435114	0.392154	543.78		0.444508	0.409945	542.276
0.454011	0.395144	546.375		0.444449	0.398632	553.529		0.444541	0.40158	555.026		0.453935	0.419372	553.414
0.463585	0.404718	557.523		0.453854	0.408037	564.892		0.453929	0.410969	566.445		0.463389	0.428826	564.746
0.473239	0.414372	568.841		0.463434	0.417617	576.45		0.463606	0.420645	578.072		0.472903	0.43834	576.263
0.482882	0.424015	580.295		0.473316	0.427499	588.2		0.473395	0.430434	589.902		0.482682	0.448119	587.975
0.492628	0.43376	591.904		0.483064	0.437247	600.119		0.483054	0.440094	601.849		0.492756	0.458193	599.846
0.502673	0.443806	603.617		0.492744	0.446926	612.202		0.49271	0.449749	613.87		0.50269	0.468127	611.814
0.51277	0.453902	615.346		0.502612	0.456795	624.434		0.502618	0.459658	626.053		0.512626	0.478063	623.873
0.522653	0.463786	627.072		0.512591	0.466774	636.747		0.512702	0.469741	638.396		0.522862	0.488299	636.058
0.53264	0.473773	638.851		0.522518	0.476701	649.124		0.522728	0.479768	650.82		0.533032	0.498469	648.356
0.542854	0.483986	650.704		0.532629	0.486812	661.578		0.532629	0.489669	663.344		0.54291	0.508346	660.757
0.552792	0.493925	662.627		0.542798	0.496981	674.131		0.542641	0.49968	675.969		0.552704	0.518141	673.245
0.562596	0.503728	674.592		0.552728	0.506911	686.751		0.552812	0.509851	688.621		0.562626	0.528063	685.799
0.57252	0.513653	686.584		0.562727	0.51691	699.445		0.562841	0.519881	701.27		0.57247	0.537907	698.388
0.582508	0.52364	698.574		0.572859	0.527042	712.234		0.572754	0.529794	713.988		0.582484	0.547921	710.997
0.592493	0.533625	710.566		0.58283	0.537013	725.073		0.582708	0.539748	726.786		0.592614	0.558051	723.656
0.602651	0.543784	722.576		0.592613	0.546796	737.891		0.592541	0.54958	739.661		0.602664	0.568101	736.381
0.6128	0.553933	734.633		0.602496	0.556679	750.747		0.602352	0.559391	752.621		0.612711	0.578148	749.206
0.622714	0.563847	746.718		0.6126	0.566782	763.718		0.612434	0.569474	765.687		0.62281	0.588247	762.155
0.63278	0.573913	758.854		0.622697	0.57688	776.765		0.62261	0.579649	778.78		0.632869	0.598306	775.196
0.642926	0.584059	771.058		0.632655	0.586837	789.859		0.632571	0.589611	791.869		0.642791	0.608228	788.216
0.652849	0.593982	783.265		0.642597	0.59678	803.023		0.642596	0.599636	804.997		0.652638	0.618075	801.216
0.662602	0.603734	795.418		0.652707	0.60689	816.215		0.652905	0.609945	818.21		0.662655	0.628092	814.29
0.672511	0.613643	807.608		0.662829	0.617011	829.392		0.662992	0.620031	831.517		0.672751	0.638188	827.445
0.682629	0.623762	819.886		0.672759	0.626942	842.596		0.672829	0.629869	844.89		0.682661	0.648098	840.678
0.692699	0.633832	832.188		0.682735	0.636918	855.854		0.68267	0.63971	858.322		0.692455	0.657892	853.985
0.702625	0.643758	844.514		0.692602	0.646785	869.161		0.692582	0.649622	871.801		0.702435	0.667872	867.349
0.712627	0.65376	856.872		0.702409	0.656592	882.536		0.702472	0.659512	885.285		0.712605	0.678042	880.723
0.722761	0.663894	869.197		0.712412	0.666595	895.983		0.712515	0.669555	898.756		0.72267	0.688107	894.098
0.732813	0.673946	881.384		0.722586	0.676769	909.386		0.722651	0.67969	912.288		0.732735	0.698172	907.514
0.742754	0.683887	893.475		0.732552	0.686735	922.662		0.732683	0.689723	925.9		0.7427	0.708137	920.992
0.752732	0.693865	905.503		0.74252	0.696703	935.841		0.742737	0.699777	939.612		0.752634	0.718071	934.588
0.762559	0.703691	917.587		0.752825	0.707008	949.006		0.752813	0.709852	953.415		0.762626	0.728063	948.283
0.772193	0.713325	929.816		0.76293	0.717113	962.19		0.762834	0.719874	967.252		0.772748	0.738185	961.968
0.781904	0.723036	942.145		0.772587	0.72677	975.443		0.772722	0.729762	981.046		0.782721	0.748158	975.595
0.791729	0.732861	954.44		0.782149	0.736332	988.792		0.782657	0.739697	994.85		0.792627	0.758064	989.233
0.801641	0.742774	966.6		0.791912	0.746095	1002.2		0.792693	0.749733	1008.73		0.802803	0.76824	1002.95
0.811989	0.753122	977.998		0.801696	0.755879	1015.59		0.802694	0.759734	1022.69		0.812852	0.778289	1016.74
0.822594	0.763727	987.999		0.81179	0.765972	1028.97		0.812553	0.769592	1036.74		0.822637	0.788074	1030.63
0.832769	0.773902	996.474		0.822174	0.776356	1042.4		0.822426	0.779466	1050.85		0.832488	0.797925	1044.64
0.842419	0.783551	1003.45		0.832399	0.786582	1055.95		0.8325	0.789539	1064.97		0.842527	0.807964	1058.69
0.849258	0.79039	1008.96		0.842541	0.796724	1069.66		0.842638	0.799678	1079.09		0.852515	0.817952	1072.72
0.851899	0.793032	1012.87		0.852711	0.806894	1083.5		0.852697	0.809736	1093.27		0.862574	0.828011	1086.75
0.852818	0.793951	1015.06		0.862781	0.816964	1097.4		0.862742	0.819782	1107.49		0.87278	0.838217	1100.83
0.854589	0.795722	1012.16		0.87266	0.826843	1111.16		0.872659	0.829699	1121.79		0.882841	0.848278	1114.98
0.854803	0.795935	1009.01		0.882584	0.836767	1124.82		0.882574	0.839614	1136.21		0.892771	0.858208	1129.18
0.85493	0.796063	1005.83		0.892669	0.846852	1138.49		0.892681	0.849721	1150.71		0.902816	0.868253	1143.46
0.855007	0.79614	1002.8		0.902703	0.856886	1152.19		0.902805	0.859845	1165.16		0.912801	0.878238	1157.84
0.855055	0.796188	999.876		0.912559	0.866742	1165.88		0.912688	0.869728	1179.56		0.922606	0.888043	1172.2
0.855078	0.79621	997.028		0.922409	0.876592	1179.59		0.922645	0.879685	1194		0.93237	0.897807	1186.53
0.855097	0.796229	994.28		0.932479	0.886661	1193.31		0.932854	0.889893	1208.51		0.942374	0.907811	1200.96
0.8551	0.796233	991.639		0.942636	0.896819	1206.96		0.942786	0.899826	1223.09		0.952524	0.917961	1215.51
0.855108	0.796241	989.084		0.952631	0.906814	1220.58		0.95258	0.90962	1237.75		0.962591	0.928028	1230.08
0.855101	0.796234	986.624		0.962708	0.916891	1234.23		0.962519	0.919558	1252.51		0.972566	0.938003	1244.66
0.855106	0.796238	984.243		0.972682	0.926864	1247.94		0.97253	0.92957	1267.27		0.982701	0.948138	1259.14
0.855101	0.796233	981.938		0.982573	0.936756	1261.69		0.982477	0.939516	1281.97		0.992896	0.958333	1273.48
0.855093	0.796226	979.71		0.992606	0.946788	1275.5		0.992618	0.949657	1296.63		1.00288	0.968315	1287.8
0.855088	0.796221	977.552		1.0028	0.956982	1289.26		1.00284	0.959883	1311.29		1.01274	0.978175	1302.26
0.855083	0.796216	975.452		1.01275	0.966931	1302.94		1.01281	0.969848	1325.9		1.02231	0.987748	1316.85
0.855072	0.796205	973.413		1.02259	0.976769	1316.57		1.02276	0.979795	1340.45		1.03169	0.997124	1331.53
				1.03278	0.986962	1330.24		1.03274	0.989785	1355		1.04139	1.00682	1346.31
				1.04288	0.997065	1343.96		1.04262	0.999659	1369.52		1.05179	1.01723	1361.15
				1.05268	1.00686	1357.73		1.05227	1.00931	1383.94		1.0622	1.02764	1376.01
				1.06249	1.01667	1371.54		1.06192	1.01896	1398.38		1.0723	1.03774	1390.95
				1.07252	1.0267	1385.34		1.07177	1.02881	1412.96		1.08251	1.04794	1406.1
				1.08251	1.0367	1399.09		1.08184	1.03888	1427.65		1.09278	1.05822	1421.47
				1.09262	1.0468	1412.75		1.09182	1.04886	1442.39		1.10277	1.06821	1436.95
				1.1028	1.05698	1426.42		1.10193	1.05897	1457.2		1.11267	1.07811	1452.4
				1.11282	1.067	1440.12		1.11234	1.06938	1472.06		1.1226	1.08804	1467.8
				1.12278	1.07696	1453.83		1.12271	1.07975	1486.98		1.13243	1.09787	1483.19
				1.13276	1.08694	1467.21		1.13277	1.08981	1501.94		1.14242	1.10785	1498.58
				1.14272	1.0969	1479.22		1.14272	1.09976	1516.94		1.15257	1.11801	1513.98
				1.15259	1.10677	1489.3		1.15257	1.10961	1531.96		1.16256	1.12799	1529.41
				1.16239	1.11657	1497.49		1.16245	1.11949	1546.97		1.17249	1.13793	1544.93
				1.17119	1.12537	1503.9		1.17244	1.12948	1561.97		1.18264	1.14807	1560.6
				1.17587	1.13005	1508.55		1.18253	1.13957	1576.87		1.19275	1.15819	1576.38
				1.17734	1.13152	1511.38		1.19251	1.14955	1591.68		1.20264	1.16808	1592.11
				1.17817	1.13235	1512.45		1.20252	1.15956	1606.45		1.21252	1.17795	1607.77
				1.17944	1.13362	1509.3		1.21279	1.16983	1621.2		1.22263	1.18807	1623.48
				1.17972	1.1339	1505.44		1.22291	1.17995	1635.94		1.23278	1.19822	1639.27
				1.17988	1.13406	1501.19		1.23281	1.18985	1650.72		1.24276	1.2082	1655.06
				1.17998	1.13417	1497.06		1.2427	1.19974	1665.51		1.25264	1.21807	1670.93
				1.18004	1.13423	1493.08		1.25258	1.20962	1680.25		1.26264	1.22808	1686.88
				1.18008	1.13426	1489.18		1.2624	1.21944	1694.9		1.27273	1.23817	1702.78
				1.1801	1.13428	1485.39		1.27248	1.22952	1709.47		1.28268	1.24812	1718.61
				1.1801	1.13429	1481.73		1.28262	1.23966	1724.01		1.29266	1.2581	1734.49
				1.1801	1.13429	1478.19		1.29256	1.2496	1738.53		1.30272	1.26815	1750.44
				1.18011	1.13429	1474.76		1.30256	1.2596	1753.1		1.31259	1.27802	1766.49
				1.1801	1.13428	1471.45		1.31271	1.26975	1767.78		1.32242	1.28786	1782.65
				1.1801	1.13428	1468.24		1.32274	1.27978	1782.45		1.33258	1.29801	1798.85
				1.18009	1.13427	1465.12		1.33259	1.28963	1796.96		1.34268	1.30812	1815.02
				1.18008	1.13426	1462.1		1.34254	1.29958	1811.37		1.35257	1.31801	1831.1
								1.35268	1.30972	1825.81		1.36267	1.32811	1847.2
								1.36279	1.31983	1840.23		1.37288	1.33832	1863.41
								1.37271	1.32975	1854.62		1.38276	1.34819	1879.73
								1.38261	1.33965	1869.04		1.39251	1.35795	1896.11
								1.39267	1.34971	1883.45		1.40244	1.36788	1912.54
								1.40275	1.35979	1897.72		1.41245	1.37789	1928.97
								1.41268	1.36972	1911.92		1.42247	1.38791	1945.33
								1.42272	1.37976	1926.14		1.43262	1.39805	1961.68
								1.43269	1.38973	1940.42		1.44275	1.40819	1978.06
								1.44251	1.39955	1954.72		1.45276	1.4182	1994.47
								1.45245	1.40949	1968.47		1.4628	1.42824	2010.87
								1.46265	1.41969	1980.46		1.47282	1.43826	2027.24
								1.47267	1.4297	1990.23		1.48276	1.44819	2043.48
								1.4825	1.43954	1997.83		1.49259	1.45803	2059.55
								1.49087	1.44791	2003.44		1.50253	1.46797	2075.54
								1.49471	1.45175	2007.05		1.51259	1.47802	2091.5
								1.49572	1.45276	2008.63		1.52266	1.4881	2107.38
								1.49709	1.45413	2005.71		1.53261	1.49805	2123.17
								1.49753	1.45457	2001.26		1.5426	1.50804	2138.82
								1.49778	1.45482	1995.43		1.55277	1.51821	2154.33
								1.49792	1.45496	1989.4		1.56284	1.52828	2169.68
								1.498	1.45504	1983.66		1.57276	1.53819	2184.94
								1.49806	1.4551	1978.17		1.58261	1.54805	2200.06
								1.49808	1.45512	1972.85		1.59246	1.5579	2215.09
								1.4981	1.45514	1967.72		1.60237	1.56781	2230.03
								1.4981	1.45514	1962.78		1.61248	1.57791	2244.82
								1.49811	1.45515	1958.02		1.62256	1.588	2259.36
								1.4981	1.45514	1953.44		1.63254	1.59798	2273.65
								1.4981	1.45514	1949.01		1.64266	1.6081	2287.77
								1.49809	1.45513	1944.73		1.65293	1.61837	2301.67
								1.49809	1.45513	1940.6		1.66291	1.62834	2315.37
												1.67275	1.63819	2328.85
												1.68267	1.64811	2342.07
												1.69254	1.65798	2354.94
												1.70248	1.66792	2367.45
												1.7126	1.67804	2379.67
												1.72268	1.68812	2391.64
												1.73264	1.69808	2403.39
												1.74274	1.70817	2415
												1.75285	1.71829	2426.45
												1.76279	1.72823	2437.58
												1.77259	1.73803	2448.32
												1.78257	1.74801	2458.8
												1.79267	1.75811	2469.06
												1.80263	1.76807	2478.93
												1.81246	1.7779	2488.43
												1.82246	1.7879	2497.55
												1.8326	1.79803	2506.17
												1.84262	1.80806	2514.25
												1.85263	1.81806	2521.93
												1.86273	1.82816	2529.3
												1.87267	1.83811	2536.38
												1.88255	1.84798	2543.24
												1.89271	1.85815	2549.91
												1.90285	1.86829	2556.35
												1.91268	1.87812	2562.56
												1.92266	1.8881	2568.62
												1.93293	1.89836	2574.58
												1.94286	1.9083	2580.43
												1.9526	1.91804	2586.09
												1.9625	1.92794	2591.64
												1.97254	1.93798	2596.99
												1.98252	1.94796	2602.07
												1.99264	1.95808	2606.94
												2.00284	1.96827	2611.71
												2.01288	1.97831	2616.38
												2.02285	1.98828	2621.03
												2.03278	1.99821	2625.74
												2.04269	2.00813	2630.5
												2.05251	2.01794	2635.25
												2.06238	2.02782	2640.04
												2.07243	2.03787	2645.01
												2.08257	2.048	2650.16
												2.0926	2.05804	2655.44
												2.10258	2.06801	2660.78
												2.11275	2.07819	2666.15
												2.123	2.08844	2671.52
												2.13299	2.09843	2676.92
												2.14286	2.1083	2682.39
												2.15265	2.11809	2687.99
												2.16248	2.12792	2693.79
												2.17248	2.13792	2699.71
												2.18258	2.14801	2705.64
												2.19255	2.15798	2711.64
												2.20263	2.16807	2717.84
												2.21291	2.17835	2724.27
												2.2229	2.18834	2730.93
												2.23278	2.19822	2737.82
												2.24271	2.20815	2744.89
												2.2526	2.21804	2752.06
												2.26246	2.22789	2759.29
												2.27254	2.23798	2766.57
												2.28264	2.24808	2773.94
												2.29252	2.25796	2781.37
												2.30258	2.26802	2788.92
												2.31275	2.27819	2796.64
												2.32274	2.28818	2804.34
												2.33256	2.298	2811.86
												2.34255	2.30799	2819.32
												2.35274	2.31818	2826.79
												2.36282	2.32826	2834.21
												2.37271	2.33815	2841.64
												2.38266	2.3481	2849.11
												2.39273	2.35817	2856.55
												2.40273	2.36817	2863.8
												2.41266	2.3781	2870.96
												2.42274	2.38817	2878.12
												2.43269	2.39812	2885.3
												2.44249	2.40792	2892.49
												2.45251	2.41795	2899.71
												2.46272	2.42815	2906.81
												2.47267	2.43811	2913.69
												2.48258	2.44802	2920.41
												2.49285	2.45829	2927.16
												2.50291	2.46835	2933.95
												2.51263	2.47807	2940.71
												2.52241	2.48785	2947.39
												2.53242	2.49786	2953.98
												2.54243	2.50787	2960.41
												2.55254	2.51797	2966.6
												2.56274	2.52818	2972.69
												2.57279	2.53823	2978.72
												2.5828	2.54824	2984
												2.59282	2.55826	2987.36
												2.61264	2.57808	2986.84
												2.62073	2.58617	2983.31
												2.62449	2.58992	2977.84
												2.62576	2.59119	2970.49
												2.62665	2.59209	2961.41
												2.62743	2.59287	2950.66
												2.62796	2.59339	2938.33
												2.62825	2.59369	2925.11
												2.62841	2.59385	2912.17
												2.62851	2.59394	2900.09
												2.62857	2.594	2888.78
												2.6286	2.59403	2878.09
												2.62861	2.59405	2867.98
												2.62862	2.59406	2858.44
												2.62862	2.59406	2849.41
												2.62862	2.59406	2840.84
												2.62861	2.59405	2832.69
												2.62861	2.59405	2824.89
												2.6286	2.59403	2817.43
												2.6286	2.59404	2810.27
												2.62859	2.59403	2803.4
												2.62858	2.59402	2796.79

## Sheet: BH 5
BH 5 (1000 N)				BH 5 (1500 N)				BH 5 (2000 N)				BH 5 (3000 N)
Standard travel	Displacement corrected	Standard force		Standard travel	Displacement corrected	Standard force		Standard travel	Displacement corrected	Standard force		Standard travel	Displacement corrected	Standard force
mm	mm	N		mm	mm	N		mm	mm	N		mm	mm	N
0	-0.0694755	111.368		0	-0.0674514	113.553		0	-0.0835403	108.882		0	-0.0574372	113.016
2.16722e-06	-0.0694733	110.355		-5.6541e-06	-0.067457	112.538		-3.5727e-06	-0.0835439	107.81		-3.30448e-06	-0.0574405	112.007
2.57492e-07	-0.0694752	109.244		-5.53608e-06	-0.0674569	111.49		-5.45025e-06	-0.0835458	106.681		-1.13833e-05	-0.0574486	110.933
2.03848e-07	-0.0694753	108.206		-1.29712e-05	-0.0674644	110.407		-1.05035e-05	-0.0835508	105.658		-7.66039e-06	-0.0574449	109.858
8.2612e-07	-0.0694746	107.108		6.63149e-05	-0.0673851	109.393		-1.18124e-05	-0.0835521	104.585		-9.89199e-06	-0.0574471	108.796
6.75917e-07	-0.0694748	106.082		0.00377453	-0.0636769	110.683		0.000563221	-0.0829771	103.647		0.0016678	-0.0557694	108.64
0.00430175	-0.0651737	107.474		0.00571279	-0.0617386	111.892		0.00392385	-0.0796165	104.99		0.00392731	-0.0535099	109.99
0.00639482	-0.0630806	108.968		0.00804441	-0.059407	113.488		0.0059234	-0.0776169	106.206		0.00591707	-0.0515201	111.487
0.00886056	-0.0606149	110.866		0.0107739	-0.0566775	115.377		0.00828385	-0.0752565	107.787		0.00832038	-0.0491168	113.422
0.0102307	-0.0592448	111.925		0.0122898	-0.0551616	116.413		0.0110822	-0.0724581	109.633		0.00966339	-0.0477738	114.54
0.0117122	-0.0577632	113.043		0.0139181	-0.0535333	117.506		0.0142845	-0.0692559	111.656		0.0110939	-0.0463433	115.735
0.0132869	-0.0561886	114.219		0.0156383	-0.0518131	118.649		0.0160322	-0.0675081	112.736		0.0126432	-0.044794	116.997
0.0149574	-0.0545181	115.449		0.0174564	-0.049995	119.846		0.0178722	-0.0656681	113.863		0.0142824	-0.0431548	118.325
0.0167465	-0.052729	116.728		0.0194058	-0.0480456	121.096		0.0198069	-0.0637334	115.032		0.0160157	-0.0414215	119.717
0.0186439	-0.0508316	118.061		0.0214453	-0.0460061	122.392		0.0218605	-0.0616798	116.242		0.0178495	-0.0395877	121.181
0.0206507	-0.0488248	119.443		0.0235739	-0.0438775	123.739		0.0239886	-0.0595518	117.505		0.0198043	-0.0376329	122.71
0.0227376	-0.0467379	120.881		0.0258032	-0.0416482	125.134		0.0262521	-0.0572882	118.811		0.0218566	-0.0355806	124.31
0.024905	-0.0445705	122.377		0.0281245	-0.0393269	126.59		0.0286191	-0.0549213	120.165		0.0240292	-0.033408	125.973
0.0271808	-0.0422947	123.927		0.0305177	-0.0369337	128.099		0.0310921	-0.0524482	121.564		0.0262938	-0.0311434	127.701
0.0295711	-0.0399044	125.531		0.0330131	-0.0344383	129.657		0.0336617	-0.0498786	123.011		0.0286553	-0.0287819	129.49
0.0320774	-0.0373981	127.174		0.0356205	-0.0318309	131.259		0.0363147	-0.0472256	124.505		0.0311003	-0.0263369	131.344
0.0346949	-0.0347806	128.858		0.0383453	-0.0291061	132.913		0.0390507	-0.0444896	126.049		0.0336174	-0.0238198	133.255
0.0374302	-0.0320453	130.593		0.0411839	-0.0262675	134.615		0.0418421	-0.0416983	127.638		0.0362165	-0.0212207	135.222
0.0402422	-0.0292333	132.378		0.0441068	-0.0233446	136.371		0.0447565	-0.0387838	129.278		0.0389306	-0.0185066	137.241
0.0431097	-0.0263657	134.215		0.0471158	-0.0203356	138.176		0.047782	-0.0357583	130.957		0.0417691	-0.0156681	139.293
0.0460396	-0.0234359	136.106		0.050227	-0.0172244	140.035		0.050954	-0.0325864	132.678		0.0447285	-0.0127087	141.392
0.0490636	-0.0204118	138.05		0.0534508	-0.0140006	141.945		0.0542202	-0.0293201	134.454		0.0477803	-0.00965689	143.533
0.0521983	-0.0172772	140.043		0.0568161	-0.0106353	143.911		0.0575308	-0.0260096	136.282		0.0509184	-0.00651877	145.732
0.055459	-0.0140165	142.079		0.0603049	-0.00714652	145.927		0.0609258	-0.0226145	138.161		0.0541362	-0.00330099	147.986
0.0588273	-0.0106482	144.157		0.0638583	-0.00359306	147.998		0.0644375	-0.0191028	140.096		0.0574372	0	150.301
0.0622771	-0.0071984	146.295		0.0674514	0	150.131		0.0680687	-0.0154716	142.081		0.0608393	0.00340208	152.671
0.0658331	-0.0036424	148.484		0.0711306	0.00367921	152.311		0.071807	-0.0117333	144.115		0.0643887	0.00695147	155.096
0.0694755	0	150.722		0.0749481	0.00749672	154.537		0.0756472	-0.00789311	146.204		0.0680714	0.0106342	157.594
0.0732358	0.00376034	153.009		0.0789003	0.0114489	156.818		0.079554	-0.00398628	148.335		0.0718154	0.0143782	160.167
0.0771307	0.00765526	155.355		0.0829094	0.015458	159.155		0.0835403	0	150.509		0.0756128	0.0181756	162.798
0.0811208	0.0116453	157.758		0.0869818	0.0195304	161.557		0.0876842	0.00414391	152.728		0.0795429	0.0221057	165.494
0.0851634	0.0156879	160.204		0.0911343	0.0236829	164.011		0.0919974	0.00845712	154.992		0.0836509	0.0262137	168.25
0.0893106	0.0198352	162.688		0.0954316	0.0279802	166.521		0.0963318	0.0127915	157.306		0.0878776	0.0304404	171.067
0.0936024	0.024127	165.218		0.0998474	0.032396	169.093		0.100707	0.0171671	159.671		0.0921152	0.034678	173.95
0.0980661	0.0285906	167.802		0.104352	0.036901	171.718		0.105205	0.0216649	162.08		0.0963894	0.0389522	176.899
0.102618	0.0331423	170.439		0.108933	0.041482	174.381		0.109836	0.0262953	164.548		0.100752	0.0433149	179.912
0.107174	0.0376983	173.141		0.113675	0.0462235	177.104		0.114556	0.0310153	167.061		0.105288	0.0478506	183.002
0.111791	0.0423153	175.907		0.118568	0.0511165	179.901		0.11938	0.0358395	169.626		0.109937	0.0524999	186.151
0.11657	0.0470945	178.748		0.123471	0.0560193	182.757		0.124357	0.0408168	172.26		0.114656	0.0572183	189.351
0.121475	0.0519997	181.638		0.1284	0.0609489	185.67		0.129503	0.0459623	174.968		0.119544	0.062107	192.631
0.126426	0.0569503	184.556		0.133456	0.0660043	188.644		0.134688	0.0511473	177.731		0.124584	0.0671469	195.997
0.131541	0.0620658	187.514		0.138679	0.0712275	191.694		0.139899	0.0563582	180.541		0.129672	0.0722345	199.444
0.136868	0.0673922	190.532		0.144	0.0765491	194.799		0.145218	0.0616775	183.405		0.134757	0.0773195	202.957
0.142245	0.0727691	193.605		0.149429	0.081978	197.98		0.150696	0.0671552	186.33		0.139922	0.0824853	206.529
0.147568	0.0780921	196.732		0.155047	0.0875959	201.239		0.156202	0.072662	189.309		0.145245	0.0878078	210.169
0.152969	0.0834933	199.908		0.16075	0.0932988	204.585		0.161771	0.0782307	192.344		0.150661	0.0932234	213.871
0.15853	0.0890545	203.127		0.166432	0.0989802	207.99		0.16752	0.08398	195.444		0.156114	0.0986772	217.649
0.164129	0.0946537	206.391		0.172221	0.10477	211.459		0.173406	0.089866	198.589		0.16172	0.104282	221.51
0.169844	0.100368	209.708		0.178181	0.110729	214.995		0.179351	0.0958103	201.772		0.167439	0.110002	225.45
0.175734	0.106258	213.101		0.184163	0.116711	218.61		0.185435	0.101894	205.017		0.173247	0.11581	229.468
0.181655	0.11218	216.568		0.190219	0.122768	222.301		0.191661	0.108121	208.353		0.179223	0.121786	233.556
0.187668	0.118192	220.104		0.196448	0.128997	226.054		0.197848	0.114307	211.782		0.185364	0.127927	237.738
0.193924	0.124448	223.701		0.202793	0.135342	229.886		0.204078	0.120538	215.268		0.191516	0.134079	242.036
0.200283	0.130807	227.372		0.209239	0.141787	233.795		0.210468	0.126928	218.803		0.197704	0.140267	246.427
0.206668	0.137193	231.119		0.215847	0.148396	237.801		0.217004	0.133463	222.403		0.204024	0.146587	250.885
0.213129	0.143654	234.932		0.222471	0.15502	241.919		0.223783	0.140243	226.058		0.210461	0.153023	255.41
0.219655	0.150179	238.819		0.229086	0.161635	246.138		0.230577	0.147037	229.784		0.21712	0.159683	259.998
0.226374	0.156899	242.769		0.235861	0.16841	250.448		0.237293	0.153752	233.59		0.223891	0.166454	264.659
0.233274	0.163798	246.771		0.242794	0.175343	254.867		0.244161	0.16062	237.478		0.230557	0.17312	269.393
0.240213	0.170738	250.845		0.249927	0.182476	259.399		0.251156	0.167616	241.456		0.237292	0.179855	274.197
0.247157	0.177682	255.014		0.257082	0.189631	264.05		0.258267	0.174726	245.516		0.244208	0.186771	279.091
0.254165	0.18469	259.277		0.264172	0.196721	268.842		0.265503	0.181963	249.655		0.251179	0.193742	284.085
0.261227	0.191751	263.629		0.271439	0.203988	273.79		0.272781	0.189241	253.87		0.258279	0.200842	289.149
0.268463	0.198988	268.048		0.278813	0.211362	278.923		0.280274	0.196734	258.172		0.265428	0.207991	294.287
0.275881	0.206405	272.546		0.286289	0.218838	284.229		0.287972	0.204431	262.574		0.272736	0.215299	299.513
0.283367	0.213891	277.143		0.293875	0.226423	289.683		0.295735	0.212195	267.074		0.280319	0.222882	304.852
0.290946	0.221471	281.859		0.301566	0.234115	295.297		0.303488	0.219948	271.648		0.287998	0.230561	310.301
0.298552	0.229076	286.704		0.309508	0.242057	301.096		0.311236	0.227696	276.312		0.295649	0.238212	315.821
0.306241	0.236765	291.706		0.317594	0.250142	307.086		0.319223	0.235683	281.079		0.303284	0.245846	321.421
0.314122	0.244647	296.873		0.325665	0.258214	313.249		0.327285	0.243745	285.943		0.311169	0.253732	327.108
0.322211	0.252735	302.192		0.333706	0.266255	319.565		0.335347	0.251807	290.907		0.319276	0.261839	332.879
0.330379	0.260903	307.664		0.341912	0.274461	326.043		0.343425	0.259884	295.974		0.327328	0.269891	338.725
0.338525	0.269049	313.313		0.350299	0.282848	332.686		0.351577	0.268037	301.184		0.335355	0.277918	344.66
0.346825	0.27735	319.194		0.358702	0.291251	339.482		0.359967	0.276427	306.542		0.343419	0.285982	350.678
0.355221	0.285746	325.282		0.367078	0.299627	346.415		0.368555	0.285015	312.063		0.351651	0.294214	356.786
0.363638	0.294162	331.558		0.375486	0.308034	353.503		0.377277	0.293737	317.765		0.360159	0.302721	362.996
0.372178	0.302702	338.033		0.384107	0.316656	360.765		0.386043	0.302503	323.663		0.368808	0.311371	369.31
0.380919	0.311444	344.737		0.392981	0.32553	368.204		0.394874	0.311333	329.77		0.377461	0.320024	375.737
0.38984	0.320364	351.624		0.401993	0.334541	375.798		0.403929	0.320389	336.065		0.386125	0.328688	382.271
0.398646	0.329171	358.631		0.411039	0.343588	383.551		0.413184	0.329643	342.519		0.394977	0.33754	388.921
0.407487	0.338012	365.777		0.420153	0.352702	391.48		0.422408	0.338867	349.156		0.404057	0.34662	395.639
0.416624	0.347148	373.098		0.429503	0.362052	399.564		0.431603	0.348063	356.024		0.413178	0.355741	402.406
0.426011	0.356535	380.587		0.439039	0.371587	407.763		0.440894	0.357354	363.129		0.422197	0.36476	409.252
0.435195	0.365719	388.227		0.448516	0.381064	416.066		0.450145	0.366605	370.457		0.431351	0.373914	416.232
0.444386	0.374911	396.056		0.457965	0.390514	424.519		0.459492	0.375951	378.012		0.440597	0.38316	423.319
0.453784	0.384309	404.077		0.467539	0.400087	433.127		0.469092	0.385551	385.799		0.449868	0.392431	430.491
0.463384	0.393908	412.223		0.477088	0.409637	441.86		0.478963	0.395423	393.77		0.459308	0.401871	437.768
0.473041	0.403565	420.441		0.486706	0.419255	450.713		0.488777	0.405236	401.896		0.469111	0.411674	445.154
0.482936	0.413461	428.747		0.496591	0.42914	459.69		0.49862	0.415079	410.185		0.478991	0.421554	452.61
0.49301	0.423534	437.168		0.50667	0.439218	468.746		0.508817	0.425276	418.652		0.488771	0.431334	460.094
0.502998	0.433522	445.691		0.516612	0.449161	477.852		0.518969	0.435429	427.251		0.498763	0.441326	467.642
0.512938	0.443463	454.3		0.526589	0.459138	487.021		0.528884	0.445344	435.976		0.509046	0.451609	475.251
0.52286	0.453385	462.997		0.53687	0.469418	496.269		0.538735	0.455195	444.808		0.519083	0.461646	482.92
0.532739	0.463263	471.752		0.546969	0.479518	505.581		0.548681	0.46514	453.73		0.528839	0.471401	490.631
0.542553	0.473077	480.507		0.556828	0.489376	514.953		0.558556	0.475016	462.703		0.538655	0.481217	498.391
0.552399	0.482924	489.265		0.566685	0.499233	524.378		0.568493	0.484953	471.713		0.548578	0.491141	506.145
0.562392	0.492916	498.09		0.576624	0.509172	533.835		0.578538	0.494997	480.789		0.558471	0.501033	513.887
0.572511	0.503036	506.988		0.586474	0.519022	543.307		0.588581	0.505041	489.944		0.568535	0.511097	521.632
0.582603	0.513127	515.939		0.596455	0.529003	552.794		0.598627	0.515087	499.191		0.578657	0.521219	529.4
0.592592	0.523116	524.918		0.606576	0.539125	562.326		0.608683	0.525143	508.52		0.588642	0.531205	537.209
0.60275	0.533274	533.907		0.616606	0.549155	571.913		0.618726	0.535186	517.927		0.598701	0.541264	545.063
0.612969	0.543494	542.895		0.626625	0.559174	581.587		0.628661	0.54512	527.336		0.60885	0.551412	552.96
0.622949	0.553474	551.894		0.636708	0.569257	591.34		0.638613	0.555073	536.742		0.618881	0.561444	560.839
0.632896	0.56342	560.903		0.646744	0.579293	601.135		0.648667	0.565127	546.188		0.628756	0.571319	568.684
0.64272	0.573244	569.941		0.656624	0.589173	610.899		0.658771	0.575231	555.695		0.638675	0.581238	576.515
0.652554	0.583079	579.031		0.666589	0.599138	620.653		0.668774	0.585234	565.255		0.6487	0.591263	584.392
0.662495	0.59302	588.154		0.676699	0.609247	630.454		0.67866	0.595119	574.874		0.65872	0.601283	592.301
0.672578	0.603102	597.26		0.686814	0.619362	640.306		0.688643	0.605103	584.493		0.668553	0.611116	600.219
0.682558	0.613083	606.348		0.696745	0.629294	650.207		0.69875	0.61521	594.078		0.678392	0.620955	608.113
0.692563	0.623088	615.456		0.706606	0.639155	660.159		0.70877	0.62523	603.67		0.68849	0.631052	615.995
0.702828	0.633352	624.594		0.716653	0.649202	670.115		0.718786	0.635245	613.304		0.698623	0.641186	623.857
0.712947	0.643471	633.757		0.726784	0.659333	680.026		0.728714	0.645174	622.993		0.70866	0.651223	631.727
0.722846	0.65337	642.959		0.736771	0.669319	689.941		0.738532	0.654992	632.755		0.718704	0.661267	639.631
0.732748	0.663273	652.189		0.746796	0.679344	699.897		0.748442	0.664902	642.599		0.728646	0.671209	647.564
0.742681	0.673205	661.422		0.7567	0.689249	709.911		0.758607	0.675067	652.445		0.73858	0.681143	655.555
0.75251	0.683035	670.639		0.766522	0.699071	719.984		0.768667	0.685127	662.244		0.748714	0.691277	663.561
0.7625	0.693024	679.836		0.776457	0.709006	730.113		0.778616	0.695076	672.031		0.758807	0.70137	671.514
0.772593	0.703117	689.049		0.786647	0.719196	740.226		0.788773	0.705233	681.866		0.768713	0.711276	679.425
0.782547	0.713071	698.283		0.796675	0.729224	750.285		0.798893	0.715353	691.771		0.778711	0.721274	687.395
0.79258	0.723104	707.562		0.806615	0.739164	760.331		0.80873	0.72519	701.739		0.788905	0.731467	695.412
0.802729	0.733254	716.912		0.816804	0.749352	770.419		0.818541	0.735	711.748		0.798793	0.741356	703.488
0.812756	0.743281	726.288		0.826873	0.759422	780.566		0.828518	0.744977	721.769		0.808566	0.751129	711.621
0.822635	0.753159	735.605		0.836679	0.769228	790.77		0.838472	0.754932	731.78		0.818505	0.761068	719.8
0.832583	0.763108	744.878		0.846518	0.779066	801.014		0.848493	0.764953	741.787		0.828533	0.771095	727.981
0.842719	0.773243	754.16		0.856491	0.789039	811.256		0.858678	0.775137	751.838		0.838492	0.781055	736.132
0.852845	0.78337	763.451		0.866427	0.798975	821.477		0.868724	0.785184	761.937		0.848643	0.791205	744.284
0.86279	0.793315	772.75		0.876514	0.809063	831.685		0.878672	0.795131	772.075		0.858853	0.801415	752.471
0.872658	0.803183	782.09		0.886741	0.81929	841.898		0.888786	0.805246	782.28		0.868861	0.811424	760.682
0.882684	0.813208	791.407		0.896734	0.829283	852.09		0.89889	0.815349	792.522		0.878852	0.821414	768.922
0.892754	0.823279	800.636		0.90671	0.839259	862.249		0.908753	0.825213	802.733		0.88885	0.831412	777.209
0.902734	0.833258	809.816		0.916864	0.849413	872.391		0.918527	0.834987	812.918		0.898741	0.841304	785.502
0.912784	0.843309	819.016		0.92691	0.859458	882.497		0.928568	0.845027	823.158		0.908481	0.851044	793.76
0.92274	0.853265	828.233		0.936612	0.86916	892.5		0.938694	0.855154	833.459		0.918331	0.860894	802.012
0.932544	0.863069	837.481		0.946262	0.87881	902.461		0.948686	0.865146	843.756		0.928405	0.870968	810.322
0.942428	0.872953	846.771		0.956082	0.888631	912.497		0.958606	0.875066	854.067		0.938551	0.881114	818.672
0.952644	0.883168	856.026		0.965992	0.89854	922.6		0.968712	0.885171	864.404		0.948572	0.891134	827.049
0.962711	0.893236	865.196		0.975912	0.908461	932.7		0.978896	0.895356	874.719		0.958608	0.901171	835.448
0.972616	0.903141	874.289		0.985813	0.918362	942.803		0.988826	0.905286	885.024		0.968803	0.911366	843.848
0.982815	0.913339	883.399		0.996109	0.928657	952.918		0.99874	0.9152	895.383		0.978936	0.921499	852.226
0.992937	0.923461	892.569		1.00654	0.939094	963.04		1.00865	0.925111	905.789		0.988902	0.931465	860.599
1.0027	0.933229	901.756		1.01667	0.949219	973.176		1.01846	0.934924	916.227		0.998872	0.941435	868.975
1.01247	0.942997	910.935		1.02664	0.959184	983.343		1.02833	0.944791	926.732		1.00869	0.951256	877.358
1.02245	0.952978	920.102		1.0365	0.969044	993.538		1.03854	0.954995	937.277		1.0185	0.961066	885.773
1.03244	0.962965	929.225		1.04637	0.978922	1003.73		1.04863	0.965093	947.814		1.02852	0.971078	894.223
1.04251	0.973032	938.279		1.05634	0.988893	1013.88		1.05852	0.97498	958.322		1.03863	0.981191	902.671
1.05266	0.983185	947.326		1.06652	0.99907	1023.95		1.06867	0.985127	968.857		1.04853	0.991097	911.086
1.06274	0.993263	956.389		1.07656	1.0091	1033.93		1.07898	0.995439	979.442		1.05851	1.00107	919.492
1.07278	1.0033	965.451		1.08652	1.01907	1043.87		1.08895	1.00541	990.061		1.06882	1.01138	927.918
1.08284	1.01337	974.408		1.09677	1.02932	1053.8		1.09871	1.01517	1000.7		1.07896	1.02152	936.379
1.09287	1.02339	982.629		1.10696	1.03951	1063.72		1.10861	1.02507	1011.35		1.08885	1.03141	944.883
1.10278	1.0333	989.535		1.11686	1.04941	1073.63		1.11852	1.03498	1022.01		1.0987	1.04126	953.414
1.11259	1.04312	995.057		1.12669	1.05924	1083.54		1.12847	1.04493	1032.63		1.10858	1.05114	961.939
1.12222	1.05275	999.315		1.13661	1.06916	1093.4		1.13856	1.05502	1043.21		1.11845	1.06101	970.445
1.12875	1.05928	1002.34		1.14647	1.07902	1103.2		1.14866	1.06512	1053.8		1.12852	1.07109	978.929
1.13105	1.06158	1004.13		1.15647	1.08902	1112.92		1.15871	1.07517	1064.44		1.13865	1.08121	987.413
1.1319	1.06242	1004.69		1.16664	1.09919	1122.61		1.1688	1.08526	1075.12		1.14859	1.09116	995.939
1.13329	1.06381	1002.29		1.1767	1.10925	1132.26		1.17885	1.09531	1085.83		1.1586	1.10117	1004.53
1.13363	1.06416	999.4		1.1867	1.11925	1141.9		1.18878	1.10524	1096.49		1.16871	1.11128	1013.19
1.13383	1.06436	996.054		1.19681	1.12935	1151.58		1.19863	1.11509	1107.06		1.17875	1.12131	1021.86
1.13395	1.06447	992.813		1.20686	1.13941	1161.23		1.2086	1.12506	1117.57		1.18865	1.13121	1030.47
1.13402	1.06455	989.764		1.21672	1.14927	1170.8		1.21867	1.13512	1128.01		1.1986	1.14116	1039.06
1.13406	1.06459	986.841		1.22655	1.1591	1180.29		1.22863	1.14509	1138.34		1.20869	1.15126	1047.68
1.13408	1.06461	984.023		1.23661	1.16916	1189.77		1.23847	1.15493	1148.62		1.21881	1.16137	1056.33
1.1341	1.06462	981.329		1.24669	1.17924	1199.24		1.24837	1.16483	1158.95		1.22876	1.17132	1065
1.1341	1.06463	978.74		1.2566	1.18914	1208.68		1.25829	1.17475	1169.32		1.23864	1.1812	1073.71
1.1341	1.06462	976.247		1.26647	1.19902	1218.1		1.268	1.18446	1179.66		1.24866	1.19122	1082.41
1.1341	1.06462	973.859		1.27652	1.20907	1227.32		1.27765	1.19411	1190		1.25876	1.20132	1091.05
1.1341	1.06462	971.56		1.28661	1.21916	1236.44		1.28776	1.20422	1200.36		1.26873	1.21129	1099.63
1.13409	1.06462	969.342		1.29665	1.2292	1245.5		1.2981	1.21456	1210.74		1.27875	1.22131	1108.13
1.13409	1.06461	967.201		1.30675	1.2393	1254.55		1.30828	1.22474	1221.22		1.28869	1.23125	1116.55
1.13408	1.06461	965.125		1.31673	1.24928	1263.56		1.31849	1.23495	1231.76		1.29853	1.2411	1125.03
1.13408	1.0646	963.107		1.3266	1.25914	1272.56		1.3286	1.24506	1242.33		1.30838	1.25094	1133.66
1.13407	1.06459	961.152		1.33655	1.2691	1281.57		1.33852	1.25498	1252.88		1.31822	1.26078	1142.3
1.13407	1.06459	959.248		1.34677	1.27931	1290.52		1.34863	1.26509	1263.37		1.32773	1.27029	1150.87
1.13407	1.06459	957.397		1.35676	1.28931	1299.33		1.35888	1.27534	1273.8		1.3375	1.28006	1159.41
				1.3666	1.29915	1308.05		1.36875	1.28521	1284.23		1.34811	1.29067	1167.99
				1.37674	1.30929	1316.95		1.37851	1.29497	1294.67		1.35858	1.30114	1176.64
				1.38692	1.31947	1325.86		1.38848	1.30494	1305.13		1.36849	1.31105	1185.36
				1.39673	1.32928	1334.74		1.3985	1.31496	1315.53		1.37834	1.3209	1194.2
				1.4065	1.33905	1343.6		1.40852	1.32498	1325.83		1.3884	1.33096	1203.12
				1.41651	1.34906	1352.43		1.41866	1.33512	1336.05		1.39842	1.34099	1211.98
				1.42651	1.35906	1361.2		1.42884	1.3453	1346.27		1.40851	1.35107	1220.71
				1.43656	1.3691	1369.85		1.43888	1.35534	1356.5		1.41868	1.36124	1229.35
				1.44674	1.37929	1378.45		1.44884	1.3653	1366.71		1.42873	1.37129	1237.92
				1.45686	1.3894	1387.07		1.45877	1.37523	1376.92		1.43872	1.38128	1246.02
				1.46686	1.39941	1395.67		1.46866	1.38512	1387.07		1.44879	1.39136	1252.77
				1.47682	1.40937	1404.28		1.47844	1.3949	1397.1		1.45881	1.40137	1258.03
				1.48675	1.4193	1412.88		1.48833	1.40479	1407.1		1.46868	1.41124	1262.39
				1.49663	1.42918	1421.43		1.49842	1.41488	1417.11		1.47858	1.42114	1266.36
				1.50643	1.43898	1429.92		1.50855	1.42501	1427.11		1.4886	1.43116	1270.25
				1.51635	1.4489	1438.42		1.51857	1.43503	1437.11		1.49869	1.44125	1274.12
				1.52645	1.459	1446.96		1.52863	1.44509	1447.06		1.50871	1.45127	1277.98
				1.53656	1.46911	1455.55		1.53887	1.45533	1456.94		1.51861	1.46117	1281.85
				1.54658	1.47913	1464.15		1.54898	1.46544	1466.75		1.52865	1.47122	1285.76
				1.55666	1.48921	1472.7		1.55891	1.47537	1476.51		1.53883	1.48139	1290.07
				1.56689	1.49944	1480.69		1.5688	1.48526	1486.23		1.54883	1.4914	1295.64
				1.57697	1.50952	1487.4		1.5786	1.49506	1495.94		1.55873	1.5013	1302.58
				1.58692	1.51947	1492.66		1.58843	1.50489	1505.68		1.56858	1.51114	1310.22
				1.59669	1.52923	1496.57		1.59849	1.51495	1515.39		1.57845	1.52101	1318.02
				1.60426	1.5368	1499.18		1.60854	1.525	1525.04		1.5884	1.53096	1325.65
				1.60745	1.54	1500.43		1.61851	1.53497	1534.64		1.59856	1.54112	1332.92
				1.60852	1.54107	1500.35		1.62864	1.5451	1544.23		1.60856	1.55113	1339.81
				1.60938	1.54193	1498.95		1.63893	1.55539	1553.82		1.61855	1.56111	1346.38
				1.61008	1.54263	1496.29		1.64892	1.56538	1563.42		1.62883	1.57139	1352.67
				1.61053	1.54308	1492.45		1.65882	1.57528	1573.01		1.63899	1.58156	1358.66
				1.61077	1.54332	1487.96		1.66873	1.58519	1582.58		1.64888	1.59144	1364.39
				1.61091	1.54345	1483.5		1.67858	1.59504	1592.11		1.65871	1.60127	1369.86
				1.61099	1.54354	1479.29		1.68847	1.60493	1601.59		1.66865	1.61121	1375.13
				1.61105	1.5436	1475.24		1.69856	1.61502	1611.02		1.67849	1.62106	1380.26
				1.61107	1.54362	1471.34		1.70861	1.62507	1620.46		1.68851	1.63107	1385.38
				1.61109	1.54364	1467.61		1.71854	1.635	1629.89		1.69867	1.64123	1390.56
				1.6111	1.54364	1464.04		1.72862	1.64508	1639.4		1.70868	1.65124	1395.76
								1.73872	1.65518	1648.97		1.71868	1.66124	1400.89
								1.74867	1.66513	1658.5		1.72881	1.67137	1405.93
								1.75854	1.675	1667.94		1.73887	1.68144	1410.88
								1.76857	1.68503	1677.33		1.74878	1.69134	1415.72
								1.77874	1.6952	1686.72		1.75864	1.70121	1420.53
								1.78881	1.70527	1696.08		1.76868	1.71125	1425.4
								1.79871	1.71517	1705.44		1.77871	1.72128	1430.3
								1.80866	1.72512	1714.82		1.78857	1.73113	1435.21
								1.81873	1.73519	1724.11		1.79841	1.74097	1440.12
								1.82873	1.74519	1733.29		1.80846	1.75103	1444.97
								1.8387	1.75516	1742.45		1.81861	1.76117	1449.77
								1.84876	1.76522	1751.62		1.82863	1.77119	1454.6
								1.85864	1.77509	1760.81		1.8387	1.78127	1459.5
								1.86843	1.78489	1770.05		1.8487	1.79126	1464.44
								1.87852	1.79498	1779.33		1.85858	1.80114	1469.38
								1.88872	1.80518	1788.53		1.86857	1.81113	1474.29
								1.89864	1.8151	1797.59		1.87878	1.82134	1479.1
								1.9086	1.82506	1806.6		1.88878	1.83135	1483.74
								1.91889	1.83535	1815.64		1.89864	1.8412	1488.25
								1.92888	1.84534	1824.73		1.90878	1.85134	1492.73
								1.93862	1.85508	1833.81		1.91895	1.86151	1497.23
								1.94847	1.86493	1842.87		1.92876	1.87132	1501.75
								1.95846	1.87492	1851.91		1.9385	1.88107	1506.27
								1.96846	1.88492	1860.86		1.94848	1.89104	1510.76
								1.97858	1.89504	1869.72		1.9585	1.90107	1515.17
								1.98874	1.9052	1878.58		1.9686	1.91116	1519.47
								1.99875	1.91521	1887.45		1.9788	1.92136	1523.73
								2.00882	1.92528	1896.32		1.98889	1.93146	1528
								2.01886	1.93532	1905.16		1.99886	1.94142	1532.27
								2.02882	1.94528	1913.94		2.0088	1.95137	1536.56
								2.03867	1.95513	1922.6		2.01873	1.96129	1540.83
								2.04853	1.96499	1931.21		2.02864	1.9712	1544.96
								2.05853	1.97499	1939.81		2.03844	1.981	1548.95
								2.06864	1.9851	1948.41		2.04838	1.99094	1552.87
								2.07864	1.9951	1956.99		2.05847	2.00104	1556.76
								2.08861	2.00507	1965.49		2.06856	2.01112	1560.58
								2.09872	2.01518	1973.78		2.07853	2.0211	1564.31
								2.10884	2.0253	1981.18		2.08861	2.03117	1567.92
								2.1188	2.03526	1987		2.09888	2.04144	1571.43
								2.12869	2.04515	1991.12		2.10899	2.05155	1574.87
								2.13825	2.05471	1993.66		2.11895	2.06151	1578.29
								2.14873	2.06519	1991.81		2.1288	2.07137	1581.62
								2.14959	2.06605	1988.12		2.1386	2.08117	1584.93
								2.15023	2.06669	1983.04		2.14849	2.09106	1588.2
								2.15061	2.06707	1976.74		2.15855	2.10111	1591.35
								2.15081	2.06727	1969.91		2.16853	2.11109	1594.39
								2.15095	2.06741	1963.26		2.17848	2.12104	1597.35
								2.15102	2.06748	1956.94		2.18869	2.13125	1600.26
								2.15106	2.06752	1950.9		2.19896	2.14153	1603.12
								2.15109	2.06755	1945.11		2.20892	2.15148	1605.95
								2.1511	2.06756	1939.59		2.21879	2.16135	1608.76
								2.15111	2.06756	1934.32		2.2287	2.17126	1611.63
								2.1511	2.06756	1929.29		2.23852	2.18108	1614.49
								2.15111	2.06757	1924.49		2.24846	2.19102	1617.38
								2.1511	2.06756	1919.88		2.25859	2.20115	1620.29
								2.1511	2.06756	1915.46		2.2686	2.21116	1623.21
								2.15109	2.06755	1911.2		2.2785	2.22106	1626.07
								2.15109	2.06755	1907.09		2.28862	2.23118	1628.92
								2.15107	2.06753	1903.12		2.29874	2.2413	1631.74
								2.15107	2.06753	1899.29		2.30869	2.25125	1634.39
												2.31857	2.26114	1636.8
												2.32864	2.27121	1639.05
												2.33883	2.28139	1641.19
												2.34884	2.2914	1643.19
												2.35868	2.30124	1645.15
												2.36869	2.31125	1647.08
												2.37876	2.32133	1648.98
												2.38873	2.33129	1650.8
												2.39873	2.34129	1652.62
												2.40878	2.35134	1654.49
												2.41866	2.36122	1656.44
												2.42848	2.37105	1658.44
												2.43859	2.38116	1660.47
												2.44872	2.39128	1662.44
												2.45862	2.40119	1664.33
												2.46867	2.41124	1666.23
												2.47893	2.42149	1668.22
												2.48881	2.43137	1670.3
												2.49853	2.44109	1672.4
												2.50844	2.45101	1674.51
												2.51845	2.46101	1676.6
												2.52848	2.47104	1678.63
												2.53862	2.48118	1680.6
												2.54876	2.49133	1682.56
												2.55879	2.50135	1684.48
												2.56884	2.51141	1686.37
												2.57886	2.52142	1688.18
												2.58881	2.53137	1689.92
												2.59865	2.54121	1691.59
												2.60857	2.55113	1693.31
												2.61861	2.56117	1695.11
												2.62867	2.57123	1697.01
												2.63863	2.58119	1698.97
												2.64862	2.59118	1700.95
												2.65879	2.60135	1702.88
												2.66887	2.61144	1704.77
												2.67881	2.62137	1706.65
												2.68871	2.63127	1708.46
												2.69854	2.6411	1710.17
												2.70842	2.65098	1711.83
												2.7185	2.66106	1713.41
												2.72858	2.67114	1714.89
												2.73853	2.68109	1716.31
												2.74864	2.6912	1717.72
												2.75892	2.70148	1719.18
												2.76893	2.71149	1720.65
												2.77879	2.72135	1722.15
												2.7887	2.73126	1723.66
												2.79859	2.74115	1725.15
												2.80848	2.75104	1726.54
												2.81857	2.76113	1727.84
												2.82871	2.77128	1729.06
												2.83868	2.78125	1730.2
												2.84876	2.79133	1731.28
												2.85887	2.80143	1731.96
												2.87863	2.8212	1731.66
												2.89871	2.84127	1730.56
												2.91856	2.86112	1728.94
												2.92849	2.87106	1727.94
												2.9386	2.88116	1726.77
												2.94867	2.89124	1725.46
												2.95869	2.90125	1724.47
												2.96881	2.91137	1724.05
												2.98856	2.93113	1723.68
												2.99868	2.94124	1723.7
												3.00885	2.95141	1723.83
												3.02867	2.97123	1724.44
												3.0389	2.98146	1725.05
												3.05861	3.00118	1726.81
												3.0685	3.01106	1727.88
												3.07854	3.0211	1729.03
												3.08854	3.03111	1730.22
												3.09866	3.04122	1731.44
												3.10884	3.05141	1732.73
												3.11887	3.06143	1734.11
												3.12886	3.07143	1735.53
												3.1388	3.08137	1736.98
												3.1487	3.09126	1738.37
												3.15853	3.10109	1739.64
												3.16839	3.11095	1740.83
												3.17843	3.12099	1741.97
												3.18858	3.13114	1743.05
												3.19861	3.14117	1744.04
												3.21879	3.16136	1745.71
												3.22897	3.17154	1746.34
												3.24883	3.1914	1747.26
												3.26848	3.21104	1747.71
												3.27849	3.22105	1747.73
												3.28857	3.23113	1747.55
												3.30855	3.25112	1746.7
												3.31886	3.26142	1746.13
												3.32895	3.27151	1745.54
												3.34875	3.29131	1744.42
												3.36844	3.31101	1743.12
												3.37849	3.32105	1742.63
												3.38861	3.33117	1742.31
												3.4086	3.35116	1742.34
												3.41874	3.36131	1742.73
												3.42874	3.37131	1743.27
												3.44853	3.3911	1744.56
												3.4587	3.40126	1745.59
												3.46885	3.41141	1746.77
												3.47877	3.42133	1748.08
												3.48867	3.43124	1749.51
												3.49873	3.44129	1751
												3.50876	3.45132	1752.45
												3.5187	3.46127	1753.85
												3.52875	3.47131	1755.21
												3.5387	3.48127	1756.54
												3.54851	3.49108	1757.81
												3.55849	3.50105	1759.02
												3.56874	3.5113	1760.09
												3.58859	3.53115	1761.61
												3.5988	3.54136	1762.14
												3.6089	3.55146	1762.57
												3.62848	3.57105	1763
												3.63849	3.58105	1763
												3.65854	3.6011	1762.61
												3.66872	3.61128	1762.28
												3.6788	3.62136	1761.9
												3.68885	3.63141	1761.49
												3.69892	3.64148	1761.06
												3.71876	3.66132	1760.21
												3.73858	3.68114	1759.66
												3.7487	3.69126	1759.6
												3.75872	3.70128	1759.68
												3.7787	3.72127	1760.19
												3.78887	3.73143	1760.66
												3.80873	3.7513	1762.11
												3.82846	3.77102	1764.21
												3.83844	3.781	1765.45
												3.84855	3.79111	1766.74
												3.85859	3.80115	1768.06
												3.86857	3.81114	1769.42
												3.87879	3.82135	1770.82
												3.88896	3.83152	1772.22
												3.89889	3.84145	1773.64
												3.90874	3.85131	1775.04
												3.91865	3.86122	1776.37
												3.92847	3.87103	1777.6
												3.93847	3.88104	1778.74
												3.94866	3.89122	1779.79
												3.95872	3.90128	1780.77
												3.96873	3.91129	1781.72
												3.97886	3.92142	1782.64
												3.98891	3.93147	1783.5
												4.00861	3.95117	1784.82
												4.01866	3.96123	1785.37
												4.02871	3.97127	1785.87
												4.04849	3.99105	1786.67
												4.05854	4.0011	1786.98
												4.06865	4.01121	1787.15
												4.07867	4.02123	1787.22
												4.08875	4.03131	1787.21
												4.09875	4.04131	1787.12
												4.1186	4.06116	1786.89
												4.12878	4.07135	1786.76
												4.14861	4.09117	1786.4
												4.15874	4.10131	1786.28
												4.16891	4.11148	1786.29
												4.18851	4.13107	1786.7
												4.19851	4.14108	1787.15
												4.20855	4.15112	1787.71
												4.21861	4.16118	1788.36
												4.22876	4.17133	1789.11
												4.23887	4.18143	1789.99
												4.24886	4.19142	1790.99
												4.25883	4.20139	1792.1
												4.26875	4.21132	1793.27
												4.27863	4.22119	1794.44
												4.28844	4.231	1795.59
												4.29837	4.24093	1796.76
												4.30847	4.25104	1797.95
												4.31861	4.26117	1799.11
												4.32861	4.27117	1800.2
												4.3387	4.28126	1801.18
												4.34895	4.29152	1802.03
												4.35903	4.30159	1802.74
												4.37876	4.32132	1803.8
												4.39847	4.34103	1804.51
												4.40856	4.35113	1804.65
												4.41859	4.36116	1804.61
												4.43872	4.38128	1804.2
												4.44893	4.39149	1803.88
												4.46876	4.41133	1803.18
												4.48852	4.43109	1802.38
												4.50857	4.45113	1801.53
												4.51861	4.46117	1801.26
												4.53866	4.48122	1801.3
												4.54876	4.49132	1801.64
												4.56857	4.51113	1802.59
												4.57866	4.52123	1803.25
												4.58885	4.53141	1804.08
												4.59886	4.54142	1805.06
												4.60873	4.55129	1806.19
												4.6187	4.56127	1807.44
												4.62875	4.57132	1808.72
												4.63869	4.58125	1809.99
												4.64869	4.59125	1811.33
												4.65877	4.60133	1812.75
												4.66866	4.61122	1814.23
												4.67849	4.62105	1815.75
												4.68861	4.63118	1817.27
												4.69874	4.64131	1818.68
												4.70862	4.65118	1819.94
												4.71867	4.66123	1821.09
												4.72891	4.67147	1822.16
												4.74851	4.69107	1823.77
												4.76847	4.71104	1823.99
												4.7785	4.72106	1823.22
												4.78866	4.73123	1821.48
												4.79879	4.74135	1818.48
												4.8088	4.75136	1814.2
												4.81887	4.76143	1808.89
												4.82892	4.77149	1802.91
												4.83883	4.78139	1796.58
												4.84866	4.79123	1790.18
												4.85858	4.80114	1783.97
												4.86864	4.8112	1778.2
												4.87871	4.82127	1773.09
												4.88866	4.83122	1769.03
												4.89864	4.8412	1766.35
												4.90876	4.85132	1765.11
												4.91887	4.86143	1765.07
												4.93868	4.88124	1767.21
												4.94852	4.89109	1768.85
												4.95844	4.90101	1770.62
												4.96853	4.91109	1772.3
												4.9786	4.92116	1773.67
												4.99861	4.94117	1774.84
												5.00889	4.95145	1774.05
												5.01891	4.96147	1771.91
												5.02879	4.97135	1768.58
												5.03871	4.98127	1764.58
												5.04859	4.99115	1760.28
												5.05848	5.00105	1755.93
												5.06862	5.01118	1751.77
												5.07875	5.02131	1747.99
												5.08871	5.03127	1744.78
												5.09879	5.04136	1742.38
												5.10889	5.05146	1741.19
												5.12862	5.07119	1742.97
												5.13863	5.0812	1745.32
												5.14874	5.0913	1748.12
												5.15871	5.10127	1751.11
												5.16853	5.11109	1754.12
												5.17845	5.12101	1757.08
												5.18861	5.13117	1759.85
												5.19871	5.14127	1762.31
												5.20869	5.15125	1764.37
												5.21876	5.16132	1765.92
												5.23857	5.18114	1765.82
												5.2487	5.19126	1762.46
												5.25884	5.2014	1755.21
												5.26869	5.21126	1741.29
												5.27864	5.2212	1715.72
												5.28892	5.23148	1676.62
												5.29893	5.24149	1630.9

## Sheet: BH 6
BH 6 (1000 N)				BH 6 (1500 N)				BH 6 (2000 N)				BH 6 (3000 N)				BH 6 (4000 N)				BH 6 (5000 N)				BH 6 (6000 N)
Standard travel	Displacement corrected	Standard force		Standard travel	Displacement corrected	Standard force		Standard travel	Displacement corrected	Standard force		Standard travel	Displacement corrected	Standard force		Standard travel	Displacement corrected	Standard force		Standard travel	Displacement corrected	Standard force		Standard travel	Displacement corrected	Standard force
mm	mm	N		mm	mm	N		mm	mm	N		mm	mm	N		mm	mm	N		mm	mm	N		mm	mm	N
0	-0.0122695	138.783		0	-0.0156218	133.323		0	-0.0179953	130.927		0	-0.0195056	130.239		0	-0.0187278	129.745		0	-0.0175536	130.592		0	-0.0175348	131.708
-1.19519e-05	-0.0122814	137.609		-8.79765e-07	-0.0156227	132.24		-3.62635e-06	-0.0179989	129.903		3.65853e-06	-0.0195019	129.233		-2.2316e-06	-0.01873	128.721		-2.8646e-06	-0.0175565	129.488		-1.0407e-06	-0.0175358	130.614
-2.43437e-05	-0.0122938	136.523		-2.3818e-06	-0.0156242	131.114		-4.39882e-06	-0.0179997	128.846		8.36849e-07	-0.0195047	128.17		-8.58306e-08	-0.0187279	127.708		2.75731e-06	-0.0175508	128.375		-4.93526e-06	-0.0175397	129.561
-3.87311e-05	-0.0123082	135.288		-2.76804e-06	-0.0156246	130.072		-5.46098e-06	-0.0180007	127.757		-1.24455e-06	-0.0195068	127.074		-6.43729e-08	-0.0187279	126.615		-2.25306e-06	-0.0175558	127.346		-4.1306e-06	-0.0175389	128.464
-4.2733e-05	-0.0123122	134.147		-5.31077e-06	-0.0156272	128.969		2.09105e-05	-0.0179744	126.718		0.000206047	-0.0192995	126.133		8.43286e-06	-0.0187194	125.536		-4.95672e-06	-0.0175585	126.337		-1.84536e-06	-0.0175366	127.518
-4.5265e-05	-0.0123147	133.082		0.000494814	-0.015127	128.354		0.00234681	-0.0156485	128.104		0.0022311	-0.0172745	127.39		0.00195715	-0.0167707	126.541		0.00225029	-0.0153033	127.374		0.00224975	-0.015285	128.753
-4.69494e-05	-0.0123164	132.073		0.00224575	-0.0133761	129.709		0.00393819	-0.0140571	129.894		0.00377458	-0.015731	129.047		0.00343859	-0.0152892	128.094		0.00383554	-0.0137181	129.121		0.00381822	-0.0137166	130.5
0.00282688	-0.00944259	133.76		0.00379848	-0.0118234	131.639		0.0048772	-0.0131181	131.1		0.0046938	-0.0148118	130.175		0.00432806	-0.0143998	129.181		0.0047747	-0.0127789	130.306		0.0047508	-0.012784	131.689
0.003697	-0.00857247	134.884		0.00472556	-0.0108963	132.937		0.00594852	-0.0120468	132.522		0.00573156	-0.013774	131.509		0.00531237	-0.0134154	130.48		0.00580749	-0.0117461	131.706		0.00578526	-0.0117495	133.088
0.00464254	-0.00762693	136.249		0.00575556	-0.00986628	134.464		0.00708287	-0.0109124	134.162		0.00685881	-0.0126468	133.049		0.00641038	-0.0123174	131.991		0.00694112	-0.0106125	133.314		0.00691065	-0.0106241	134.698
0.00567481	-0.00659465	137.867		0.0068817	-0.00874014	136.215		0.00832656	-0.00966872	136.012		0.00807728	-0.0114283	134.786		0.00761489	-0.0111129	133.711		0.00816406	-0.00938952	135.111		0.00814096	-0.00939384	136.516
0.0067889	-0.00548057	139.726		0.00809582	-0.00752602	138.178		0.00968868	-0.00830661	138.053		0.0093924	-0.0101132	136.7		0.00890073	-0.00982708	135.628		0.0094723	-0.00808129	137.086		0.0094505	-0.0080843	138.516
0.00801746	-0.00425201	141.798		0.00939682	-0.00622502	140.333		0.0111345	-0.00686079	140.255		0.0108207	-0.00868491	138.772		0.0102942	-0.00843364	137.695		0.0108871	-0.00666653	139.206		0.0108633	-0.0066715	140.678
0.0093387	-0.00293076	144.045		0.0108071	-0.00481477	142.655		0.0126917	-0.00530355	142.601		0.0123539	-0.00715163	140.978		0.0118059	-0.00692189	139.903		0.0124083	-0.00514532	141.444		0.0123793	-0.00515545	142.981
0.0107514	-0.00151803	146.451		0.0123002	-0.00332167	145.127		0.0143607	-0.00363457	145.076		0.0139956	-0.00550994	143.317		0.0134156	-0.00531222	142.236		0.0140271	-0.00352648	143.808		0.0139912	-0.00354355	145.42
0.0122695	0	149.017		0.0139024	-0.00171939	147.735		0.0161389	-0.00185641	147.683		0.0157372	-0.00376839	145.786		0.0150972	-0.00363058	144.671		0.0157389	-0.00181468	146.286		0.0157034	-0.00183137	147.977
0.0138908	0.00162132	151.748		0.0156218	0	150.479		0.0179953	0	150.415		0.0175821	-0.00192343	148.384		0.0168671	-0.0018607	147.211		0.0175536	0	148.878		0.0175348	0	150.655
0.0156292	0.00335969	154.652		0.0174522	0.00183034	153.358		0.0199266	0.0019313	153.279		0.0195056	0	151.102		0.0187278	0	149.87		0.0194917	0.00193811	151.587		0.0194825	0.0019477	153.452
0.0174594	0.00518995	157.719		0.0193806	0.00375874	156.377		0.0219578	0.00396255	156.273		0.0215412	0.00203561	153.942		0.0206862	0.00195842	152.636		0.0215173	0.00396368	154.414		0.021519	0.0039842	156.37
0.0193912	0.00712175	160.957		0.0214081	0.00578625	159.533		0.0240859	0.00609057	159.4		0.0236801	0.0041745	156.912		0.0227366	0.00400881	155.515		0.0236367	0.00608308	157.368		0.0236244	0.00608964	159.416
0.0214276	0.00915812	164.354		0.023537	0.00791518	162.836		0.0262999	0.00830461	162.653		0.0258869	0.00638131	160.017		0.0248737	0.00614593	158.512		0.0258444	0.00829076	160.453		0.025818	0.00828317	162.585
0.0235627	0.0112932	167.916		0.0257495	0.0101277	166.285		0.0286388	0.0106435	166.033		0.0281724	0.00866686	163.257		0.0271479	0.00842007	161.623		0.028154	0.0106004	163.668		0.0280959	0.0105611	165.888
0.0257835	0.013514	171.649		0.0280415	0.0124196	169.894		0.0310773	0.013082	169.541		0.0305577	0.0110522	166.63		0.0295204	0.0107926	164.867		0.0305264	0.0129728	167.029		0.0304918	0.012957	169.326
0.0281067	0.0158372	175.56		0.0304408	0.0148189	173.658		0.0336273	0.015632	173.179		0.0330696	0.0135641	170.135		0.0320181	0.0132903	168.236		0.0330154	0.0154618	170.513		0.0329914	0.0154566	172.893
0.0305237	0.0182542	179.634		0.0329511	0.0173292	177.587		0.036277	0.0182817	176.955		0.0357118	0.0162062	173.756		0.0346045	0.0158767	171.728		0.0356174	0.0180638	174.106		0.0356024	0.0180676	176.578
0.0330482	0.0207788	183.863		0.035582	0.0199601	181.662		0.0390197	0.0210244	180.877		0.0384648	0.0189593	177.506		0.0372734	0.0185456	175.363		0.0383658	0.0208122	177.817		0.0383443	0.0208095	180.388
0.0357105	0.023441	188.224		0.0383328	0.022711	185.89		0.0418383	0.0238431	184.951		0.041298	0.0217925	181.389		0.0400221	0.0212943	179.145		0.0412075	0.0236539	181.653		0.0411846	0.0236498	184.335
0.0384923	0.0262228	192.721		0.041192	0.0255701	190.26		0.0447203	0.0267251	189.167		0.044191	0.0246855	185.427		0.0428647	0.0241369	183.052		0.0441077	0.0265541	185.617		0.0440813	0.0265465	188.424
0.0413379	0.0290685	197.37		0.0441322	0.0285104	194.785		0.0477264	0.0297311	193.523		0.0471658	0.0276602	189.623		0.0458134	0.0270856	187.09		0.0470841	0.0295305	189.726		0.0470679	0.0295331	192.653
0.0442528	0.0319834	202.19		0.0471547	0.0315329	199.476		0.05083	0.0328348	198.007		0.0502296	0.0307241	193.967		0.0488975	0.0301696	191.261		0.0501695	0.0326159	193.99		0.0501887	0.0326539	197.002
0.0472065	0.0349371	207.189		0.0502478	0.034626	204.326		0.0540935	0.0360982	202.632		0.0534419	0.0339364	198.451		0.0520927	0.0333649	195.568		0.0533545	0.0358009	198.406		0.0534295	0.0358947	201.469
0.0502586	0.0379892	212.343		0.0534326	0.0378108	209.335		0.057435	0.0394397	207.415		0.0567692	0.0372636	203.078		0.0553547	0.0366269	200.034		0.0566709	0.0391173	202.958		0.0567825	0.0392477	206.036
0.0534305	0.041161	217.64		0.0567386	0.0411168	214.504		0.0608461	0.0428508	212.378		0.060196	0.0406904	207.857		0.0587157	0.0399879	204.667		0.0601268	0.0425732	207.639		0.0602499	0.0427151	210.716
0.0567529	0.0444835	223.066		0.0601812	0.0445593	219.841		0.0643453	0.04635	217.516		0.0637001	0.0441946	212.799		0.062187	0.0434592	209.471		0.0636638	0.0461102	212.465		0.0637902	0.0462555	215.521
0.0601792	0.0479097	228.641		0.0637218	0.0481	225.354		0.0679543	0.049959	222.822		0.0672854	0.0477798	217.893		0.065772	0.0470442	214.432		0.0672726	0.049719	217.431		0.067388	0.0498533	220.46
0.0636757	0.0514063	234.374		0.0673196	0.0516978	231.04		0.0717139	0.0537186	228.287		0.0709952	0.0514897	223.123		0.0694967	0.0507689	219.547		0.070974	0.0534204	222.526		0.0710428	0.053508	225.538
0.0672366	0.0549671	240.27		0.0710488	0.055427	236.879		0.0756035	0.0576083	233.909		0.0748318	0.0553262	228.49		0.0733617	0.0546339	224.818		0.0747833	0.0572297	227.769		0.0748453	0.0573105	230.746
0.0708963	0.0586269	246.328		0.0749212	0.0592993	242.874		0.0795795	0.0615842	239.696		0.0788157	0.0593101	233.99		0.0772726	0.0585448	230.246		0.0787237	0.0611701	233.171		0.078791	0.0612562	236.088
0.0746993	0.0624298	252.543		0.0789318	0.0633099	249.031		0.0836001	0.0656048	245.645		0.0828486	0.0633431	239.631		0.0812339	0.0625061	235.812		0.0827665	0.0652129	238.722		0.0828237	0.0652889	241.561
0.0786263	0.0663569	258.916		0.0830005	0.0673787	255.339		0.0877083	0.069713	251.778		0.0869036	0.067398	245.41		0.0852917	0.0665639	241.524		0.0868557	0.0693021	244.411		0.0869553	0.0694206	247.162
0.0826413	0.0703718	265.45		0.0870994	0.0714776	261.792		0.0919418	0.0739466	258.101		0.0910597	0.0715541	251.34		0.0894947	0.0707669	247.395		0.0910664	0.0735129	250.226		0.0912056	0.0736708	252.899
0.0867302	0.0744607	272.143		0.0912753	0.0756535	268.381		0.0962926	0.0782974	264.592		0.0953587	0.0758532	257.442		0.0937989	0.0750711	253.41		0.0954474	0.0778938	256.179		0.0955848	0.07805	258.795
0.0909269	0.0786574	278.989		0.0955741	0.0799523	275.124		0.100725	0.0827302	271.217		0.0997658	0.0802603	263.718		0.0981553	0.0794275	259.554		0.0999285	0.0823749	262.289		0.100038	0.0825035	264.858
0.0952973	0.0830278	286.001		0.100005	0.0843834	282.024		0.105266	0.0872705	277.986		0.104254	0.084748	270.16		0.102597	0.0838693	265.83		0.104449	0.0868956	268.557		0.104512	0.0869771	271.064
0.0998084	0.087539	293.188		0.104463	0.0888414	289.046		0.109977	0.091982	284.916		0.108877	0.0893718	276.773		0.107228	0.0885006	272.26		0.109016	0.0914629	274.985		0.109044	0.0915094	277.392
0.104338	0.0920681	300.561		0.108987	0.0933649	296.207		0.114814	0.0968184	292.005		0.113657	0.0941516	283.6		0.111992	0.0932641	278.838		0.113724	0.0961704	281.593		0.113699	0.0961643	283.846
0.108928	0.0966585	308.133		0.113668	0.0980458	303.559		0.119637	0.101641	299.246		0.118573	0.099067	290.64		0.116765	0.0980372	285.559		0.118563	0.10101	288.382		0.118545	0.10101	290.429
0.113638	0.101368	315.923		0.118531	0.102909	311.133		0.124527	0.106532	306.644		0.12353	0.104025	297.845		0.121563	0.102835	292.45		0.12348	0.105927	295.319		0.123449	0.105915	297.122
0.11847	0.106201	323.904		0.123422	0.107801	318.904		0.129592	0.111596	314.244		0.128483	0.108978	305.209		0.126482	0.107754	299.542		0.128472	0.110918	302.396		0.128385	0.11085	303.944
0.123387	0.111118	332.013		0.128349	0.112727	326.866		0.13477	0.116774	322.045		0.133596	0.11409	312.759		0.131524	0.112797	306.837		0.133564	0.11601	309.629		0.133467	0.115932	310.942
0.128432	0.116163	340.242		0.133451	0.117829	335.029		0.139959	0.121963	330.023		0.138854	0.119348	320.489		0.136631	0.117903	314.316		0.138809	0.121255	317.025		0.138714	0.121179	318.1
0.133658	0.121389	348.628		0.138738	0.123116	343.401		0.14519	0.127195	338.176		0.14413	0.124625	328.38		0.141812	0.123084	321.968		0.144128	0.126574	324.549		0.143987	0.126452	325.38
0.138976	0.126706	357.17		0.144075	0.128453	351.953		0.150604	0.132609	346.53		0.149485	0.129979	336.448		0.147175	0.128447	329.815		0.149533	0.131979	332.193		0.149361	0.131826	332.772
0.144277	0.132008	365.856		0.149459	0.133837	360.683		0.15615	0.138155	355.053		0.155029	0.135523	344.705		0.152663	0.133935	337.848		0.155106	0.137552	339.97		0.154952	0.137417	340.319
0.149631	0.137362	374.689		0.154992	0.13937	369.631		0.161778	0.143782	363.718		0.160688	0.141183	353.132		0.158238	0.13951	346.033		0.160777	0.143223	347.889		0.160661	0.143126	348.062
0.155122	0.142853	383.652		0.160633	0.145011	378.782		0.167531	0.149535	372.564		0.166416	0.14691	361.691		0.163932	0.145204	354.414		0.166436	0.148882	355.961		0.166364	0.148829	356.006
0.160698	0.148429	392.735		0.166361	0.150739	388.091		0.173408	0.155413	381.611		0.172279	0.152774	370.41		0.169774	0.151046	363.007		0.172188	0.154634	364.172		0.172143	0.154608	364.135
0.166309	0.15404	401.948		0.172242	0.15662	397.549		0.179326	0.16133	390.867		0.178295	0.15879	379.356		0.175698	0.15697	371.769		0.178096	0.160542	372.535		0.17807	0.160535	372.429
0.172111	0.159841	411.345		0.17826	0.162638	407.151		0.185245	0.16725	400.32		0.184284	0.164778	388.544		0.181635	0.162907	380.695		0.184141	0.166587	381.083		0.18411	0.166576	380.869
0.178021	0.165751	420.943		0.184283	0.168661	416.913		0.191305	0.17331	409.946		0.190319	0.170814	397.934		0.187758	0.16903	389.788		0.190324	0.172771	389.823		0.190351	0.172816	389.428
0.183938	0.171669	430.725		0.190393	0.174771	426.878		0.197541	0.179546	419.773		0.196506	0.177	407.478		0.194036	0.175308	399.034		0.196633	0.179079	398.728		0.196725	0.179191	398.117
0.190077	0.177807	440.662		0.196638	0.181016	437.049		0.203919	0.185924	429.814		0.202784	0.183279	417.198		0.200396	0.181668	408.479		0.202916	0.185362	407.824		0.203056	0.185521	406.97
0.196389	0.18412	450.771		0.202898	0.187276	447.414		0.21047	0.192475	440.036		0.209273	0.189767	427.097		0.206873	0.188146	418.092		0.209256	0.191702	417.116		0.209405	0.19187	415.97
0.202722	0.190452	461.084		0.209201	0.19358	457.957		0.217054	0.199058	450.457		0.21588	0.196374	437.174		0.213361	0.194634	427.847		0.215784	0.19823	426.585		0.215877	0.198343	425.106
0.209135	0.196865	471.579		0.21568	0.200058	468.639		0.223672	0.205676	461.101		0.222419	0.202914	447.456		0.219859	0.201131	437.772		0.222334	0.204781	436.251		0.22239	0.204855	434.385
0.215632	0.203362	482.215		0.222311	0.206689	479.484		0.23045	0.212455	471.943		0.229038	0.209532	457.954		0.226546	0.207818	447.865		0.228967	0.211414	446.107		0.229028	0.211493	443.809
0.22224	0.20997	492.999		0.229048	0.213426	490.52		0.237265	0.21927	483		0.235835	0.21633	468.667		0.233317	0.214589	458.159		0.235787	0.218234	456.101		0.235811	0.218276	453.386
0.229085	0.216816	503.894		0.235881	0.220259	501.745		0.244152	0.226157	494.25		0.242692	0.223186	479.608		0.240023	0.221296	468.667		0.242687	0.225133	466.25		0.24263	0.225095	463.133
0.236016	0.223746	514.897		0.242736	0.227114	513.203		0.251203	0.233207	505.637		0.249697	0.230192	490.768		0.246864	0.228136	479.344		0.249743	0.23219	476.583		0.249662	0.232127	473.051
0.242918	0.230648	526.06		0.249671	0.234049	524.885		0.258349	0.240354	517.208		0.256782	0.237276	502.12		0.253852	0.235124	490.193		0.256977	0.239423	487.098		0.25685	0.239316	483.15
0.249886	0.237616	537.404		0.256744	0.241122	536.761		0.265663	0.247668	528.997		0.263979	0.244473	513.681		0.261063	0.242335	501.273		0.264159	0.246606	497.783		0.264096	0.246561	493.444
0.256927	0.244657	548.92		0.263973	0.248351	548.821		0.273081	0.255086	541.003		0.27142	0.251914	525.463		0.268493	0.249766	512.604		0.27141	0.253857	508.609		0.271444	0.253909	503.91
0.264044	0.251774	560.587		0.271412	0.255791	561.041		0.28044	0.262445	553.189		0.278965	0.259459	537.463		0.275867	0.25714	524.179		0.278814	0.261261	519.594		0.278864	0.261329	514.554
0.271363	0.259094	572.349		0.278892	0.26327	573.438		0.287904	0.269908	565.555		0.286553	0.267047	549.651		0.283251	0.264523	535.967		0.286446	0.268893	530.752		0.286457	0.268922	525.361
0.278809	0.26654	584.246		0.286391	0.27077	586.056		0.295546	0.277551	578.124		0.294106	0.274601	562.022		0.29079	0.272062	547.954		0.294177	0.276624	542.063		0.294151	0.276616	536.327
0.286333	0.274064	596.326		0.294039	0.278417	598.919		0.303415	0.28542	590.889		0.30182	0.282314	574.584		0.298666	0.279938	560.142		0.301803	0.28425	553.518		0.3019	0.284365	547.468
0.29393	0.28166	608.615		0.301703	0.286081	612.005		0.311268	0.293273	603.824		0.30973	0.290225	587.359		0.3067	0.287972	572.482		0.309538	0.291985	565.192		0.309707	0.292172	558.776
0.301562	0.289292	621.115		0.309473	0.293851	625.262		0.31907	0.301075	616.939		0.317628	0.298123	600.347		0.31455	0.295822	584.979		0.317376	0.299822	577.118		0.317545	0.30001	570.25
0.309328	0.297058	633.828		0.317409	0.301787	638.693		0.32704	0.309045	630.322		0.325509	0.306004	613.535		0.322398	0.303671	597.711		0.32536	0.307806	589.242		0.325475	0.30794	581.856
0.317282	0.305012	646.693		0.32552	0.309898	652.356		0.335127	0.317131	643.994		0.33343	0.313924	626.943		0.330348	0.31162	610.732		0.333451	0.315897	601.495		0.333582	0.316047	593.61
0.32539	0.313121	659.653		0.333763	0.318141	666.245		0.34336	0.325365	657.863		0.341529	0.322024	640.581		0.338493	0.319765	623.969		0.341619	0.324066	613.94		0.341837	0.324302	605.539
0.333549	0.32128	672.736		0.341921	0.326299	680.273		0.351619	0.333624	671.871		0.34989	0.330385	654.461		0.346704	0.327977	637.323		0.350042	0.332489	626.661		0.350181	0.332646	617.681
0.341763	0.329493	686.005		0.350121	0.334499	694.465		0.360076	0.34208	686.101		0.358398	0.338892	668.596		0.354993	0.336265	650.883		0.358592	0.341038	639.604		0.358477	0.340942	630.041
0.350153	0.337883	699.536		0.358542	0.34292	708.857		0.368771	0.350776	700.602		0.366962	0.347456	683.004		0.363506	0.344778	664.71		0.367108	0.349554	652.728		0.366843	0.349308	642.631
0.358495	0.346226	713.24		0.367251	0.351629	723.44		0.377566	0.359571	715.302		0.375557	0.356051	697.669		0.37215	0.353423	678.828		0.375681	0.358128	666.035		0.375468	0.357933	655.383
0.366917	0.354647	727.096		0.375842	0.36022	738.182		0.38628	0.368285	730.206		0.3843	0.364795	712.607		0.380825	0.362097	693.166		0.384534	0.36698	679.574		0.384308	0.366774	668.252
0.375517	0.363247	741.15		0.384396	0.368774	753.144		0.395117	0.377121	745.335		0.393283	0.373777	727.724		0.389564	0.370836	707.739		0.393446	0.375893	693.335		0.393212	0.375677	681.273
0.384422	0.372152	755.429		0.393093	0.377471	768.415		0.404101	0.386106	760.748		0.402388	0.382883	742.951		0.398568	0.379841	722.613		0.402282	0.384729	707.262		0.402164	0.384629	694.509
0.393331	0.381062	769.813		0.401972	0.38635	783.913		0.413077	0.395082	776.395		0.411422	0.391917	758.343		0.40762	0.388892	737.791		0.411119	0.393566	721.337		0.411194	0.393659	707.987
0.402123	0.389854	784.291		0.410976	0.395354	799.512		0.422063	0.404068	792.199		0.420495	0.400989	774.028		0.416654	0.397926	753.13		0.420117	0.402563	735.616		0.420245	0.40271	721.652
0.411047	0.398777	798.968		0.420097	0.404476	815.23		0.4311	0.413105	808.182		0.429642	0.410136	789.995		0.42573	0.407002	768.616		0.42938	0.411826	750.11		0.429452	0.411917	735.53
0.420362	0.408093	813.869		0.429464	0.413842	831.178		0.440385	0.42239	824.433		0.438741	0.419236	806.164		0.434971	0.416243	784.377		0.4388	0.421247	764.793		0.438861	0.421326	749.632
0.429648	0.417378	828.947		0.438941	0.423319	847.333		0.449906	0.431911	840.966		0.447969	0.428464	822.574		0.4444	0.425672	800.354		0.448256	0.430703	779.69		0.448399	0.430864	763.879
0.438783	0.426514	844.186		0.448322	0.4327	863.581		0.459531	0.441536	857.739		0.457531	0.438025	839.284		0.453981	0.435254	816.561		0.457732	0.440178	794.857		0.457822	0.440287	778.219
0.448029	0.43576	859.682		0.45781	0.442189	879.912		0.469154	0.451159	874.764		0.467315	0.447809	856.214		0.463531	0.444804	833.023		0.467379	0.449825	810.236		0.46732	0.449785	792.707
0.457555	0.445286	875.408		0.467405	0.451783	896.339		0.478935	0.46094	892.003		0.476966	0.45746	873.28		0.473093	0.454365	849.749		0.477194	0.459641	825.727		0.477208	0.459673	807.377
0.46717	0.4549	891.242		0.477033	0.461411	912.884		0.488975	0.47098	909.374		0.486724	0.467219	890.524		0.48296	0.464232	866.643		0.486983	0.469429	841.318		0.487091	0.469556	822.204
0.476871	0.464602	907.149		0.486522	0.4709	929.582		0.499017	0.481022	926.824		0.496934	0.477428	907.975		0.492974	0.474247	883.637		0.496807	0.479254	857.067		0.4968	0.479265	837.2
0.486831	0.474561	923.203		0.495993	0.480372	946.493		0.508943	0.490948	944.423		0.507043	0.487538	925.573		0.502855	0.484127	900.7		0.506757	0.489203	872.963		0.506592	0.489057	852.372
0.496875	0.484605	939.417		0.505586	0.489964	963.652		0.518903	0.500908	962.153		0.516874	0.497369	943.292		0.512786	0.494058	917.936		0.516595	0.499042	889.004		0.516569	0.499034	867.659
0.50684	0.49457	955.614		0.515447	0.499826	980.99		0.528692	0.510697	979.983		0.526702	0.507197	961.121		0.522735	0.504007	935.372		0.526419	0.508866	905.234		0.526518	0.508983	882.958
0.516813	0.504543	970.836		0.525682	0.51006	998.442		0.538471	0.520475	997.939		0.536651	0.517146	979.033		0.532604	0.513876	952.926		0.536464	0.51891	921.602		0.53657	0.519036	898.251
0.526727	0.514457	984.223		0.53603	0.520409	1016.02		0.548476	0.53048	1016.02		0.546516	0.527011	996.968		0.542482	0.523755	970.64		0.546561	0.529007	937.988		0.546792	0.529257	913.603
0.5366	0.524331	995.582		0.546409	0.530787	1033.69		0.558611	0.540615	1034.12		0.556498	0.536992	1014.9		0.552594	0.533866	988.412		0.556519	0.538966	954.334		0.55689	0.539355	929.007
0.546087	0.533818	1004.93		0.556736	0.541114	1051.46		0.568547	0.550552	1052.2		0.566591	0.547086	1032.87		0.562629	0.543901	1006.14		0.566658	0.549104	970.723		0.566823	0.549288	944.487
0.552497	0.540227	1012.31		0.566795	0.551174	1069.39		0.578502	0.560506	1070.28		0.576566	0.55706	1050.93		0.572545	0.553817	1023.85		0.576981	0.559428	987.19		0.57682	0.559285	960.057
0.554832	0.542563	1017.73		0.576778	0.561156	1087.36		0.588792	0.570797	1088.4		0.586575	0.567069	1069.11		0.582683	0.563955	1041.64		0.586993	0.56944	1003.75		0.586802	0.569267	975.69
0.555732	0.543462	1021.19		0.586619	0.570997	1105.22		0.598951	0.580956	1106.6		0.596683	0.577178	1087.43		0.592862	0.574134	1059.54		0.596795	0.579241	1020.39		0.596615	0.57908	991.289
0.556545	0.544276	1022.7		0.596441	0.580819	1123.01		0.608821	0.590826	1124.84		0.606706	0.587201	1105.85		0.602731	0.584003	1077.58		0.606686	0.589132	1037.12		0.606366	0.588831	1006.86
0.557556	0.545286	1020.06		0.60642	0.590799	1140.8		0.618657	0.600662	1143.13		0.616588	0.597083	1124.24		0.612537	0.593809	1095.72		0.616588	0.599034	1053.86		0.616362	0.598828	1022.51
0.557761	0.545492	1016.96		0.616573	0.600952	1158.52		0.628589	0.610594	1161.45		0.62653	0.607024	1142.61		0.622502	0.603774	1113.91		0.626445	0.608891	1070.56		0.626492	0.608957	1038.29
0.557896	0.545626	1013.83		0.626549	0.610927	1176.14		0.638486	0.620491	1179.76		0.636612	0.617106	1161.07		0.632447	0.613719	1132.12		0.636494	0.618941	1087.28		0.636538	0.619003	1054.14
0.557972	0.545702	1010.85		0.63649	0.620868	1193.68		0.64849	0.630495	1198.03		0.646733	0.627227	1179.58		0.642475	0.623747	1150.33		0.64663	0.629077	1104.08		0.646523	0.628988	1070.06
0.558013	0.545743	1007.95		0.646761	0.631139	1211.2		0.658584	0.640588	1216.29		0.656724	0.637218	1198.14		0.652674	0.633946	1168.59		0.656639	0.639085	1120.99		0.656679	0.639144	1086.02
0.558038	0.545768	1005.1		0.65693	0.641308	1228.67		0.668547	0.650551	1234.62		0.666628	0.647123	1216.79		0.662731	0.644003	1186.92		0.666704	0.64915	1137.98		0.666909	0.649374	1101.97
0.558055	0.545785	1002.35		0.666849	0.651227	1246.13		0.678572	0.660576	1253.07		0.67669	0.657184	1235.49		0.6727	0.653972	1205.35		0.676833	0.65928	1155.08		0.676938	0.659403	1117.9
0.558058	0.545789	999.712		0.676737	0.661115	1263.59		0.688695	0.6707	1271.68		0.686767	0.667262	1254.13		0.682803	0.664075	1223.89		0.686879	0.669325	1172.19		0.686912	0.669377	1133.9
0.558058	0.545789	997.168		0.686632	0.67101	1280.99		0.698709	0.680714	1290.35		0.696726	0.677221	1272.76		0.69285	0.674122	1242.52		0.696753	0.679199	1189.22		0.696815	0.67928	1149.95
0.558052	0.545783	994.724		0.696471	0.680849	1298.3		0.708565	0.690569	1308.89		0.706729	0.687223	1291.42		0.702708	0.68398	1261.12		0.706658	0.689104	1206.26		0.706599	0.689064	1166.08
0.558053	0.545784	992.377		0.706485	0.690863	1315.49		0.718486	0.700491	1327.27		0.716699	0.697193	1310.16		0.712528	0.6938	1279.71		0.716709	0.699155	1223.42		0.716437	0.698902	1182.3
0.558049	0.54578	990.117		0.716639	0.701017	1332.64		0.728613	0.710618	1345.56		0.726585	0.707079	1329		0.722528	0.7038	1298.37		0.726706	0.709152	1240.67		0.726543	0.709008	1198.58
0.558044	0.545775	987.933		0.726589	0.710968	1349.77		0.738757	0.720761	1363.73		0.736487	0.716981	1348		0.732639	0.713911	1317.12		0.736523	0.71897	1257.99		0.736593	0.719058	1214.88
0.558034	0.545764	985.815		0.736532	0.72091	1366.93		0.748671	0.730675	1381.85		0.746632	0.727127	1367.03		0.742699	0.723971	1335.95		0.746406	0.728853	1275.37		0.746489	0.728954	1231.16
0.558027	0.545758	983.768		0.746644	0.731022	1384.2		0.758422	0.740426	1400.07		0.756629	0.737123	1385.99		0.752638	0.73391	1354.87		0.756498	0.738945	1292.77		0.756641	0.739106	1247.5
0.558025	0.545755	981.787		0.756712	0.74109	1401.52		0.768233	0.750237	1418.38		0.766529	0.747023	1404.92		0.762668	0.74394	1373.87		0.766622	0.749068	1310.17		0.766922	0.749387	1263.94
0.558016	0.545746	979.863		0.76661	0.750988	1418.71		0.778021	0.760026	1436.64		0.77673	0.757224	1423.94		0.772787	0.754059	1392.87		0.776658	0.759104	1327.64		0.776901	0.759366	1280.47
				0.776501	0.760879	1435.79		0.787773	0.769777	1454.84		0.786867	0.767361	1443.08		0.782761	0.764033	1411.88		0.786734	0.76918	1345.21		0.786737	0.769202	1297.08
				0.786609	0.770988	1452.73		0.797775	0.77978	1473.07		0.796694	0.777189	1462.35		0.792691	0.773964	1430.95		0.796657	0.779104	1362.89		0.796654	0.779119	1313.75
				0.796758	0.781136	1468.52		0.807994	0.789999	1491.41		0.806498	0.786992	1481.71		0.802629	0.783902	1450.06		0.806574	0.78902	1380.68		0.80652	0.788986	1330.43
				0.8067	0.791079	1482.19		0.818105	0.80011	1509.92		0.8165	0.796995	1501.13		0.81248	0.793753	1469.29		0.8167	0.799146	1398.52		0.816449	0.798914	1347.09
				0.816611	0.80099	1493.61		0.828214	0.810219	1528.67		0.82647	0.806965	1520.55		0.822387	0.803659	1488.68		0.826841	0.809287	1416.31		0.826561	0.809026	1363.74
				0.826348	0.810726	1502.89		0.838485	0.82049	1547.51		0.836511	0.817006	1539.94		0.832504	0.813776	1508.14		0.836739	0.819185	1434.01		0.836609	0.819075	1380.45
				0.832889	0.817268	1510		0.84855	0.830555	1566.28		0.84667	0.827165	1559.36		0.842559	0.823831	1527.59		0.846681	0.829127	1451.75		0.846566	0.829031	1397.27
				0.835208	0.819587	1514.87		0.858482	0.840486	1584.92		0.856723	0.837218	1578.88		0.852517	0.833789	1547		0.856872	0.839318	1469.58		0.856642	0.839108	1414.23
				0.836054	0.820432	1517.58		0.868727	0.850732	1603.48		0.866728	0.847223	1598.48		0.862726	0.843998	1566.45		0.8668	0.849246	1487.5		0.866707	0.849172	1431.3
				0.837676	0.822054	1513.33		0.878865	0.86087	1622.05		0.876813	0.857308	1618.17		0.872988	0.85426	1585.98		0.876583	0.859029	1505.5		0.876655	0.859121	1448.35
				0.837864	0.822242	1509		0.888653	0.870658	1640.65		0.886828	0.867323	1637.91		0.882929	0.864202	1605.62		0.886501	0.868947	1523.57		0.886568	0.869034	1465.33
				0.837976	0.822354	1504.69		0.898413	0.880417	1659.23		0.896697	0.877192	1657.62		0.89276	0.874032	1625.37		0.896549	0.878995	1541.67		0.896639	0.879105	1482.36
				0.838049	0.822427	1500.57		0.908407	0.890412	1677.77		0.906531	0.887026	1677.28		0.902654	0.883926	1645.22		0.906533	0.888979	1559.73		0.906791	0.889256	1499.49
				0.838084	0.822462	1496.58		0.918401	0.900406	1696.24		0.916535	0.897029	1696.97		0.912522	0.893795	1665.05		0.916628	0.899075	1577.78		0.916795	0.89926	1516.65
				0.838109	0.822487	1492.71		0.928466	0.91047	1714.54		0.926657	0.907152	1716.75		0.922456	0.903728	1684.85		0.926812	0.909258	1595.92		0.926655	0.90912	1533.91
				0.838112	0.82249	1488.99		0.938659	0.920663	1732.81		0.936698	0.917192	1736.56		0.932569	0.913842	1704.67		0.936834	0.91928	1614.14		0.93664	0.919105	1551.25
				0.838114	0.822492	1485.4		0.948738	0.930743	1751.09		0.946631	0.927126	1756.38		0.942676	0.923948	1724.54		0.946818	0.929264	1632.43		0.946762	0.929227	1568.54
				0.838114	0.822492	1481.94		0.958786	0.940791	1769.4		0.956674	0.937168	1776.08		0.952653	0.933925	1744.47		0.956776	0.939222	1650.81		0.956755	0.939221	1585.77
				0.838113	0.822491	1478.63		0.968816	0.950821	1787.69		0.966787	0.947281	1795.57		0.962766	0.944038	1764.52		0.966714	0.94916	1669.2		0.96674	0.949205	1603.06
				0.838105	0.822483	1475.44		0.978776	0.960781	1805.93		0.976765	0.957259	1814.87		0.972894	0.954166	1784.69		0.976513	0.95896	1687.54		0.976745	0.95921	1620.45
				0.838096	0.822474	1472.36		0.988668	0.970673	1824.02		0.986698	0.967192	1834.08		0.982831	0.964103	1804.79		0.98637	0.968816	1705.88		0.986628	0.969093	1637.93
				0.838092	0.82247	1469.38		0.998542	0.980546	1841.99		0.996432	0.976927	1853.26		0.992637	0.973909	1824.75		0.996409	0.978855	1724.32		0.996468	0.978933	1655.51
				0.838085	0.822463	1466.5		1.00854	0.990541	1859.93		1.00603	0.986527	1872.59		1.0026	0.983868	1844.74		1.00652	0.988967	1742.87		1.00659	0.989058	1673.14
				0.838075	0.822454	1463.7		1.01863	1.00063	1877.88		1.0157	0.996193	1892.12		1.0127	0.993968	1864.83		1.01655	0.998997	1761.5		1.01669	0.999155	1690.74
								1.02865	1.01066	1895.83		1.02564	1.00613	1911.69		1.02268	1.00395	1884.96		1.02659	1.00903	1780.17		1.0266	1.00906	1708.27
								1.03859	1.02059	1913.77		1.0356	1.0161	1931.2		1.03247	1.01375	1905.17		1.03679	1.01923	1798.81		1.03665	1.01912	1725.85
								1.04866	1.03066	1931.64		1.0457	1.0262	1950.7		1.04241	1.02368	1925.45		1.04694	1.02939	1817.41		1.04686	1.02932	1743.53
								1.05879	1.0408	1949.24		1.05622	1.03671	1970.34		1.05256	1.03383	1945.73		1.05691	1.03936	1836.04		1.05676	1.03923	1761.34
								1.06878	1.05078	1965.52		1.06665	1.04714	1990.15		1.06264	1.04391	1966		1.06686	1.04931	1854.75		1.06655	1.04902	1779.24
								1.07871	1.06072	1979.58		1.07667	1.05717	2010.13		1.0727	1.05397	1986.34		1.07668	1.05912	1873.54		1.0765	1.05897	1797.18
								1.08858	1.07059	1991.24		1.08659	1.06708	2030.27		1.08272	1.06399	2006.78		1.08647	1.06892	1892.44		1.08648	1.06895	1815.14
								1.09811	1.08012	2000.57		1.09656	1.07705	2050.4		1.09263	1.0739	2027.37		1.09644	1.07889	1911.46		1.09648	1.07895	1833.11
								1.10451	1.08652	2007.58		1.10644	1.08693	2070.35		1.10256	1.08384	2048.09		1.10656	1.08901	1930.5		1.10664	1.08911	1851.1
								1.10695	1.08896	2012.22		1.11642	1.09692	2090.08		1.11273	1.09401	2068.85		1.11651	1.09895	1949.52		1.11674	1.0992	1869.16
								1.10794	1.08994	2014.52		1.1266	1.1071	2109.68		1.12279	1.10407	2089.52		1.12651	1.10896	1968.58		1.12668	1.10915	1887.3
								1.1093	1.09131	2012.35		1.13668	1.11717	2129.2		1.13265	1.11392	2110.11		1.13682	1.11927	1987.75		1.13679	1.11925	1905.54
								1.10965	1.09166	2008.15		1.14665	1.12715	2148.68		1.14271	1.12398	2130.74		1.14695	1.1294	2007.02		1.14686	1.12932	1923.87
								1.10986	1.09186	2002.99		1.15676	1.13726	2168.21		1.1529	1.13418	2151.46		1.15684	1.13929	2026.37		1.15674	1.13921	1942.16
								1.10997	1.09198	1997.82		1.16685	1.14734	2187.71		1.16276	1.14403	2172.28		1.1667	1.14914	2045.75		1.16655	1.14901	1960.37
								1.11004	1.09205	1992.85		1.17674	1.15723	2207.01		1.17254	1.15381	2193.15		1.17662	1.15906	2065.13		1.17653	1.159	1978.64
								1.11008	1.09209	1988.03		1.18656	1.16706	2226.08		1.1825	1.16377	2214.07		1.18648	1.16893	2084.47		1.18664	1.1691	1997.03
								1.1101	1.09211	1983.35		1.19663	1.17712	2245.14		1.19249	1.17377	2234.93		1.19651	1.17895	2103.75		1.19668	1.17915	2015.43
								1.11011	1.09212	1978.86		1.20674	1.18723	2264.19		1.20253	1.1838	2255.66		1.20659	1.18904	2123.06		1.2066	1.18907	2033.89
								1.11012	1.09212	1974.53		1.21664	1.19713	2283.19		1.21271	1.19399	2276.39		1.21652	1.19897	2142.43		1.21661	1.19908	2052.39
								1.11011	1.09212	1970.36		1.22645	1.20695	2302.18		1.22284	1.20411	2297.17		1.22654	1.20899	2161.93		1.22679	1.20925	2070.88
												1.23646	1.21696	2321.13		1.23278	1.21405	2318		1.23667	1.21912	2181.56		1.23684	1.2193	2089.32
												1.24661	1.2271	2339.96		1.24276	1.22403	2338.9		1.24671	1.22916	2201.21		1.24675	1.22921	2107.78
												1.25663	1.23712	2358.64		1.25275	1.23402	2359.86		1.25659	1.23904	2220.79		1.25665	1.23911	2126.3
												1.26668	1.24717	2377.32		1.26266	1.24394	2380.76		1.26657	1.24902	2240.36		1.26649	1.24895	2144.88
												1.27671	1.2572	2396.03		1.27245	1.25373	2401.56		1.2767	1.25914	2259.99		1.27637	1.25884	2163.55
												1.28658	1.26708	2414.77		1.28233	1.26361	2422.4		1.28677	1.26922	2279.65		1.28646	1.26893	2182.26
												1.2965	1.27699	2433.51		1.29241	1.27368	2443.37		1.29671	1.27916	2299.35		1.29656	1.27903	2200.93
												1.30669	1.28719	2452.18		1.30254	1.28381	2464.41		1.30666	1.28911	2319.16		1.30653	1.28899	2219.55
												1.31677	1.29726	2470.68		1.31253	1.2938	2485.45		1.31669	1.29914	2338.96		1.31663	1.29909	2238.18
												1.32662	1.30711	2488.98		1.32259	1.30386	2506.48		1.32671	1.30915	2358.62		1.32691	1.30938	2256.85
												1.33669	1.31719	2507.25		1.33284	1.31412	2527.47		1.33667	1.31911	2378.24		1.33692	1.31938	2275.6
												1.3469	1.32739	2525.55		1.34298	1.32425	2548.37		1.34677	1.32921	2397.94		1.34674	1.3292	2294.45
												1.35677	1.33727	2543.89		1.35289	1.33416	2569.16		1.35673	1.33918	2417.65		1.3566	1.33907	2313.34
												1.36651	1.347	2562.17		1.36277	1.34404	2589.8		1.36653	1.34898	2437.3		1.36648	1.34894	2332.14
												1.37647	1.35696	2580.4		1.3726	1.35387	2610.18		1.37646	1.35891	2456.85		1.37639	1.35885	2350.72
												1.38651	1.367	2598.53		1.38244	1.36371	2630.3		1.38665	1.3691	2476.11		1.38653	1.36899	2369.05
												1.39656	1.37705	2616.45		1.39247	1.37375	2650.36		1.39663	1.37908	2495.1		1.39667	1.37913	2387.18
												1.40669	1.38718	2634.23		1.40237	1.38364	2670.52		1.40642	1.38886	2514.1		1.40658	1.38904	2405.31
												1.41681	1.3973	2651.99		1.41194	1.39321	2690.73		1.41635	1.3988	2533.33		1.41648	1.39894	2423.72
												1.42683	1.40732	2669.77		1.42151	1.40278	2710.94		1.42595	1.4084	2552.77		1.42626	1.40872	2442.39
												1.4368	1.4173	2687.54		1.43149	1.41276	2731.13		1.4353	1.41775	2572.29		1.43571	1.41818	2461.08
												1.44669	1.42719	2705.25		1.44185	1.42313	2751.33		1.44522	1.42767	2591.87		1.44526	1.42773	2479.65
												1.45658	1.43707	2722.82		1.45228	1.43355	2771.66		1.45577	1.43821	2611.53		1.45554	1.43801	2498.27
												1.46643	1.44692	2740.21		1.46238	1.44365	2792.14		1.46609	1.44854	2631.31		1.46617	1.44864	2517.12
												1.47635	1.45685	2757.52		1.47225	1.45352	2812.79		1.47619	1.45863	2651.25		1.47639	1.45886	2536.22
												1.48642	1.46692	2774.07		1.48217	1.46344	2833.6		1.4864	1.46885	2671.52		1.48627	1.46873	2555.68
												1.49654	1.47704	2790.33		1.49236	1.47364	2854.35		1.49659	1.47903	2692.01		1.49625	1.47872	2575.51
												1.50655	1.48704	2806.44		1.50252	1.48379	2874.86		1.50667	1.48912	2712.49		1.50642	1.48888	2595.43
												1.51659	1.49709	2822.35		1.51244	1.49372	2895.18		1.51675	1.4992	2732.84		1.51651	1.49898	2615.19
												1.52684	1.50733	2838.07		1.5225	1.50377	2915.52		1.52676	1.50921	2753.16		1.52658	1.50905	2634.87
												1.53697	1.51747	2853.62		1.53266	1.51394	2935.92		1.53665	1.5191	2773.41		1.53671	1.51918	2654.64
												1.54691	1.5274	2869.04		1.54265	1.52392	2956.16		1.54653	1.52898	2793.59		1.54661	1.52907	2674.52
												1.55673	1.53723	2884.38		1.5525	1.53377	2976.11		1.55652	1.53897	2813.78		1.55647	1.53894	2694.5
												1.56656	1.54706	2899.71		1.56253	1.54381	2995.93		1.56662	1.54906	2834.06		1.56662	1.54908	2714.57
												1.57649	1.55698	2915.08		1.57273	1.554	3015.69		1.57666	1.55911	2854.42		1.57678	1.55924	2734.58
												1.58654	1.56703	2931.18		1.58279	1.56407	3035.28		1.58659	1.56904	2874.82		1.58668	1.56915	2754.45
												1.59655	1.57704	2947.46		1.59267	1.57394	3054.77		1.59663	1.57908	2895.21		1.59662	1.57908	2774.3
												1.60652	1.58701	2963.35		1.60263	1.5839	3074.2		1.60679	1.58923	2915.58		1.60687	1.58933	2794.27
												1.61668	1.59717	2977.56		1.61272	1.59399	3093.45		1.61682	1.59927	2935.97		1.61687	1.59933	2814.35
												1.62692	1.60742	2989.32		1.62269	1.60396	3112.44		1.62674	1.60919	2956.42		1.62661	1.60907	2834.49
												1.63688	1.61738	2998.57		1.63262	1.61389	3131.3		1.63657	1.61902	2976.94		1.63647	1.61893	2854.72
												1.64588	1.62637	3005.36		1.6427	1.62397	3150.14		1.64642	1.62887	2997.58		1.64648	1.62894	2874.99
												1.65081	1.63131	3009.74		1.65264	1.63392	3168.94		1.65639	1.63884	3018.37		1.65648	1.63895	2895.19
												1.65241	1.63291	3011.67		1.66243	1.6437	3187.72		1.66652	1.64897	3039.13		1.66657	1.64904	2915.31
												1.65394	1.63443	3008.14		1.67249	1.65376	3206.5		1.67655	1.65899	3059.8		1.67676	1.65922	2935.49
												1.65444	1.63494	3002.89		1.6827	1.66397	3225.03		1.68653	1.66898	3080.48		1.68682	1.66929	2955.78
												1.65474	1.63523	2995.81		1.69262	1.67389	3243.13		1.69676	1.6792	3101.23		1.69683	1.67929	2976.15
												1.6549	1.6354	2988.28		1.70257	1.68384	3261.03		1.70689	1.68934	3122.02		1.70674	1.68921	2996.6
												1.655	1.6355	2981.04		1.71286	1.69413	3278.95		1.71679	1.69923	3142.86		1.71665	1.69911	3017.06
												1.65507	1.63556	2974.14		1.72286	1.70413	3296.9		1.72667	1.70912	3163.8		1.72649	1.70895	3037.46
												1.6551	1.6356	2967.51		1.73257	1.71384	3314.78		1.73665	1.7191	3184.73		1.73635	1.71882	3057.85
												1.65512	1.63562	2961.14		1.74239	1.72366	3332.58		1.74649	1.72893	3205.58		1.74636	1.72883	3078.35
												1.65513	1.63562	2955.04		1.75241	1.73368	3350.27		1.75645	1.7389	3226.34		1.75649	1.73895	3098.97
												1.65513	1.63563	2949.19		1.76244	1.74372	3367.78		1.76663	1.74907	3247.1		1.76654	1.74901	3119.66
												1.65513	1.63562	2943.58		1.77253	1.7538	3385.08		1.77667	1.75912	3267.86		1.77655	1.75901	3140.32
												1.65512	1.63562	2938.18		1.78269	1.76396	3402.47		1.78667	1.76911	3288.66		1.78676	1.76922	3160.94
												1.65512	1.63561	2933		1.79275	1.77402	3420.01		1.7968	1.77924	3309.56		1.79697	1.77944	3181.52
												1.65511	1.63561	2927.99		1.8028	1.78407	3437.55		1.80685	1.78929	3330.49		1.80695	1.78941	3202.1
												1.65511	1.6356	2923.16		1.81282	1.7941	3454.98		1.81667	1.79912	3351.26		1.81681	1.79928	3222.68
												1.6551	1.63559	2918.49		1.82279	1.80406	3472.26		1.82654	1.80898	3371.9		1.82659	1.80906	3243.26
												1.65509	1.63558	2913.96		1.83266	1.81393	3489.33		1.83662	1.81907	3392.57		1.83646	1.81893	3263.9
												1.65508	1.63558	2909.56		1.84254	1.82381	3506.25		1.84668	1.82913	3413.29		1.84651	1.82898	3284.53
												1.65508	1.63557	2905.29		1.85254	1.83381	3522.85		1.85657	1.83902	3433.98		1.85661	1.83907	3305.08
												1.65507	1.63557	2901.13		1.86263	1.84391	3537.08		1.86644	1.84889	3454.7		1.86654	1.849	3325.56
																1.87265	1.85392	3550.94		1.8765	1.85895	3475.43		1.87658	1.85905	3346.07
																1.88259	1.86386	3564.59		1.88661	1.86905	3496.04		1.88684	1.8693	3366.62
																1.89268	1.87395	3578.06		1.89657	1.87902	3516.55		1.89685	1.87932	3387.18
																1.90283	1.8841	3591.36		1.90666	1.8891	3537.09		1.90677	1.88923	3407.8
																1.91285	1.89412	3604.6		1.91667	1.89911	3557.66		1.91667	1.89914	3428.46
																1.92273	1.904	3617.78		1.9265	1.90895	3578.22		1.92654	1.909	3449.07
																1.93254	1.91382	3630.95		1.93646	1.91891	3598.81		1.93639	1.91885	3469.61
																1.94241	1.92368	3644.16		1.94669	1.92913	3619.34		1.94648	1.92895	3490.13
																1.95242	1.93369	3657.62		1.95674	1.93919	3639.67		1.95663	1.9391	3510.64
																1.96253	1.9438	3673.25		1.96659	1.94904	3659.79		1.96653	1.949	3531.16
																1.97256	1.95383	3689.04		1.9767	1.95915	3679.87		1.97655	1.95902	3551.79
																1.98261	1.96389	3704.88		1.98693	1.96938	3699.95		1.98672	1.96918	3572.57
																1.99285	1.97412	3720.75		1.9968	1.97925	3720.03		1.99673	1.97919	3593.33
																2.00287	1.98414	3736.59		2.00653	1.98897	3740.09		2.00654	1.989	3613.91
																2.01275	1.99403	3752.41		2.01648	1.99893	3760.11		2.01653	1.999	3634.43
																2.02268	2.00395	3768.21		2.02647	2.00892	3780		2.02671	2.00917	3655.02
																2.03263	2.0139	3783.89		2.03649	2.01894	3799.67		2.03677	2.01924	3675.61
																2.04249	2.02376	3799.45		2.04665	2.02909	3819.21		2.04665	2.02911	3696.21
																2.05252	2.0338	3814.9		2.05679	2.03924	3838.74		2.05658	2.03904	3716.9
																2.06269	2.04396	3830.32		2.06682	2.04926	3858.29		2.06668	2.04915	3737.56
																2.07266	2.05394	3845.69		2.07678	2.05923	3877.82		2.07673	2.05919	3758.05
																2.08272	2.06399	3861.11		2.08668	2.06913	3897.3		2.08665	2.06912	3778.49
																2.09283	2.0741	3876.61		2.09656	2.07901	3916.6		2.0967	2.07917	3799.02
																2.10281	2.08409	3892.05		2.10641	2.08886	3935.7		2.10665	2.08912	3819.62
																2.11262	2.09389	3907.27		2.11633	2.09878	3954.72		2.11644	2.09891	3840.29
																2.12255	2.10382	3922.42		2.12641	2.10886	3973.75		2.12642	2.10889	3861.06
																2.13265	2.11392	3937.62		2.13652	2.11897	3992.76		2.13665	2.11911	3881.79
																2.14266	2.12393	3952.73		2.14654	2.12898	4011.68		2.14662	2.12909	3902.34
																2.15253	2.1338	3966.82		2.15662	2.13907	4030.42		2.15651	2.13898	3922.75
																2.1625	2.14377	3978.63		2.16689	2.14934	4048.98		2.16675	2.14921	3943.25
																2.17259	2.15386	3987.77		2.177	2.15944	4067.4		2.17686	2.15933	3963.87
																2.18255	2.16382	3994.2		2.1869	2.16934	4085.7		2.18662	2.16909	3984.53
																2.19029	2.17156	3998.03		2.19671	2.17916	4103.87		2.19636	2.17882	4005.19
																2.19368	2.17495	3999.4		2.20652	2.18896	4121.97		2.20636	2.18882	4025.86
																2.19479	2.17606	3998.41		2.21648	2.19893	4140.02		2.21639	2.19885	4046.48
																2.19553	2.1768	3994.98		2.22659	2.20903	4157.9		2.22646	2.20893	4066.98
																2.19617	2.17744	3989.14		2.23659	2.21904	4175.58		2.23667	2.21913	4087.49
																2.19658	2.17785	3981		2.24653	2.22898	4193.13		2.24675	2.22921	4108.09
																2.19682	2.17809	3971.53		2.2567	2.23915	4210.64		2.25678	2.23925	4128.75
																2.19696	2.17823	3962.1		2.26688	2.24933	4228.07		2.2668	2.24926	4149.37
																2.19704	2.17831	3953.16		2.27682	2.25926	4245.42		2.27679	2.25925	4169.96
																2.19709	2.17836	3944.68		2.28673	2.26918	4262.75		2.28672	2.26918	4190.42
																2.19712	2.17839	3936.57		2.29664	2.27909	4279.96		2.29658	2.27904	4210.77
																2.19713	2.1784	3928.84		2.30644	2.28889	4296.96		2.3065	2.28897	4231.1
																2.19713	2.1784	3921.46		2.31641	2.29886	4313.78		2.31659	2.29906	4251.45
																2.19714	2.17841	3914.42		2.3266	2.30905	4330.48		2.32667	2.30913	4271.79
																2.19713	2.1784	3907.69		2.33662	2.31907	4347.05		2.33662	2.31908	4292.05
																2.19713	2.1784	3901.25		2.34651	2.32895	4363.52		2.34667	2.32913	4312.2
																				2.35662	2.33907	4377.74		2.35684	2.3393	4332.27
																				2.36675	2.3492	4389.2		2.36682	2.34929	4352.3
																				2.37665	2.3591	4398.46		2.37669	2.35915	4372.26
																				2.38651	2.36896	4407.17		2.3865	2.36897	4392.14
																				2.39662	2.37907	4415.68		2.39641	2.37887	4412.06
																				2.4068	2.38925	4424.14		2.4064	2.38886	4432
																				2.4168	2.39925	4432.52		2.41648	2.39894	4451.76
																				2.4267	2.40914	4440.91		2.42647	2.40893	4471.34
																				2.43667	2.41912	4449.32		2.43653	2.41899	4490.82
																				2.44674	2.42919	4457.64		2.44684	2.42931	4510.26
																				2.45669	2.43914	4468.08		2.45694	2.43941	4529.62
																				2.46667	2.44911	4481.28		2.46681	2.44927	4548.94
																				2.47671	2.45916	4496.57		2.47666	2.45913	4568.24
																				2.4866	2.46905	4512.2		2.48662	2.46909	4587.44
																				2.49642	2.47887	4528.07		2.49652	2.47899	4606.46
																				2.50654	2.48899	4544.05		2.50653	2.489	4625.31
																				2.51667	2.49912	4559.89		2.51668	2.49914	4644.08
																				2.52655	2.509	4575.47		2.52666	2.50913	4662.74
																				2.53659	2.51904	4590.97		2.53666	2.51913	4681.35
																				2.54689	2.52934	4606.52		2.5468	2.52926	4699.97
																				2.55682	2.53927	4622.12		2.55682	2.53929	4718.48
																				2.5665	2.54895	4637.71		2.56662	2.54909	4736.69
																				2.57634	2.55879	4653.23		2.57647	2.55894	4754.63
																				2.58634	2.56879	4668.66		2.58661	2.56907	4772.47
																				2.59639	2.57884	4683.83		2.59672	2.57918	4790.17
																				2.60657	2.58902	4698.54		2.60661	2.58908	4807.74
																				2.61678	2.59922	4713.21		2.61649	2.59896	4825.25
																				2.62681	2.60926	4727.91		2.6265	2.60897	4842.66
																				2.63683	2.61928	4742.57		2.63656	2.61902	4859.8
																				2.64681	2.62926	4757.11		2.64653	2.629	4876.68
																				2.65677	2.63921	4771.5		2.65663	2.6391	4893.46
																				2.66667	2.64911	4785.67		2.66671	2.64918	4910.14
																				2.67655	2.659	4799.71		2.67657	2.65903	4926.71
																				2.68656	2.66901	4813.71		2.68651	2.66898	4943.21
																				2.69665	2.6791	4827.73		2.69672	2.67919	4959.51
																				2.70665	2.6891	4841.96		2.70674	2.68921	4975.45
																				2.71662	2.69907	4856.11		2.71659	2.69905	4991.03
																				2.72677	2.70921	4870.14		2.72677	2.70924	5006.43
																				2.73687	2.71932	4884.08		2.73697	2.71944	5021.69
																				2.74678	2.72923	4897.97		2.74675	2.72921	5036.84
																				2.75661	2.73906	4911.76		2.75646	2.73892	5051.86
																				2.76646	2.7489	4925.51		2.76642	2.74888	5066.73
																				2.77641	2.75886	4939.32		2.77635	2.75882	5081.35
																				2.78648	2.76893	4953.04		2.78635	2.76881	5095.6
																				2.79652	2.77896	4965.98		2.79654	2.77901	5109.59
																				2.80648	2.78893	4976.73		2.80676	2.78922	5123.43
																				2.81667	2.79912	4984.8		2.81684	2.7993	5137.11
																				2.82696	2.80941	4990.24		2.8268	2.80927	5150.6
																				2.83571	2.81816	4993.11		2.83671	2.81918	5163.89
																				2.84153	2.82398	4991.3		2.84658	2.82905	5176.84
																				2.84234	2.82478	4986.72		2.85643	2.83889	5189.38
																				2.84303	2.82547	4979.64		2.86636	2.84883	5201.6
																				2.84349	2.82594	4970.22		2.87648	2.85894	5213.59
																				2.84377	2.82622	4959.2		2.88661	2.86907	5225.29
																				2.84393	2.82638	4948.08		2.89659	2.87905	5236.62
																				2.84403	2.82647	4937.47		2.90664	2.88911	5247.52
																				2.84408	2.82652	4927.36		2.91689	2.89935	5257.92
																				2.84411	2.82656	4917.67		2.92698	2.90944	5267.78
																				2.84413	2.82658	4908.39		2.93688	2.91935	5277.03
																								2.94671	2.92918	5285.61
																								2.95657	2.93904	5293.47
																								2.96652	2.94899	5300.47
																								2.9766	2.95907	5306.32
																								2.9866	2.96907	5310.88
																								2.99655	2.97902	5314.21
																								3.00674	2.9892	5316.33
																								3.0169	2.99937	5317.19
																								3.03673	3.0192	5315.38
																								3.04667	3.02914	5312.7
																								3.05651	3.03898	5309.05
																								3.06651	3.04897	5304.85
																								3.07666	3.05913	5300.68
																								3.08668	3.06915	5296.94
																								3.09661	3.07908	5293.93
																								3.10673	3.0892	5292.06
																								3.11682	3.09928	5291.46
																								3.13647	3.11894	5294.04
																								3.14658	3.12904	5297.64
																								3.1568	3.13927	5302.83
																								3.16679	3.14926	5309.35
																								3.17666	3.15913	5316.98
																								3.18669	3.16915	5325.51
																								3.1968	3.17927	5334.62
																								3.20673	3.18919	5344.09
																								3.21668	3.19914	5353.93
																								3.22669	3.20916	5363.99
																								3.23657	3.21904	5374.18
																								3.24641	3.22888	5384.57
																								3.25658	3.23904	5395.09
																								3.26672	3.24919	5405.56
																								3.27658	3.25905	5415.88
																								3.28662	3.26908	5426.19
																								3.29689	3.27936	5436.58
																								3.30682	3.28929	5447.01
																								3.31651	3.29898	5457.42
																								3.3264	3.30886	5467.98
																								3.33641	3.31888	5478.6
																								3.34645	3.32892	5489.09
																								3.35659	3.33905	5499.45
																								3.3668	3.34926	5509.8
																								3.37685	3.35932	5520.16
																								3.38688	3.36934	5530.46
																								3.39687	3.37933	5540.66
																								3.40679	3.38926	5550.7
																								3.41664	3.3991	5560.56
																								3.4265	3.40897	5570.24
																								3.43655	3.41901	5579.85
																								3.44665	3.42912	5589.39
																								3.45664	3.43911	5598.8
																								3.46662	3.44909	5608.04
																								3.47678	3.45924	5617.12
																								3.4869	3.46936	5626.07
																								3.49681	3.47927	5634.92
																								3.5066	3.48906	5643.63
																								3.51643	3.49889	5652.22
																								3.52636	3.50882	5660.82
																								3.53644	3.51891	5669.29
																								3.54651	3.52897	5677.48
																								3.55648	3.53895	5685.42
																								3.56666	3.54913	5693.23
																								3.57696	3.55943	5700.86
																								3.58693	3.5694	5708.28
																								3.59676	3.57922	5715.55
																								3.60669	3.58916	5722.64
																								3.61659	3.59905	5729.43
																								3.62647	3.60894	5735.88
																								3.63658	3.61905	5742.05
																								3.64668	3.62914	5747.98
																								3.65662	3.63908	5753.72
																								3.66671	3.64917	5759.32
																								3.67682	3.65928	5764.44
																								3.68671	3.66917	5768.83
																								3.69649	3.67896	5772.73
																								3.7065	3.68896	5776.3
																								3.71662	3.69908	5779.62
																								3.72662	3.70908	5782.6
																								3.73652	3.71899	5785.32
																								3.74653	3.72899	5787.82
																								3.75665	3.73912	5789.95
																								3.76663	3.7491	5791.65
																								3.77662	3.75909	5793.35
																								3.78673	3.7692	5795.25
																								3.79667	3.77913	5796.95
																								3.80652	3.78899	5798.43
																								3.81667	3.79914	5799.64
																								3.82686	3.80932	5799.98
																								3.83677	3.81923	5798.7
																								3.84671	3.82917	5795.69
																								3.85695	3.83942	5791.08
																								3.86693	3.8494	5784.98
																								3.87666	3.85912	5777.41
																								3.88651	3.86897	5768.46
																								3.89651	3.87898	5758.22
																								3.90654	3.88901	5746.77
																								3.91665	3.89911	5734.28
																								3.92685	3.90931	5721.52
																								3.93692	3.91939	5709.39
																								3.94695	3.92942	5698.29
																								3.95684	3.93931	5688.39
																								3.96674	3.9492	5679.68
																								3.9766	3.95906	5672.13
																								3.98647	3.96894	5665.83
																								3.99649	3.97896	5660.85
																								4.0066	3.98906	5657.1
																								4.01664	3.9991	5654.5
																								4.02661	4.00908	5652.86
																								4.0368	4.01926	5652
																								4.04699	4.02945	5651.76
																								4.06681	4.04927	5652.73
																								4.08649	4.06896	5654.95
																								4.09656	4.07902	5656.33
																								4.10663	4.0891	5657.65
																								4.11657	4.09904	5658.96
																								4.12665	4.10912	5660.33
																								4.13693	4.11939	5661.68
																								4.14688	4.12935	5662.82
																								4.15675	4.13921	5663.92
																								4.1667	4.14917	5665.01
																								4.18641	4.16888	5666.85
																								4.19651	4.17898	5667.66
																								4.20666	4.18912	5668.46
																								4.22661	4.20908	5669.99
																								4.2368	4.21927	5670.94
																								4.24681	4.22927	5672.02
																								4.2665	4.24897	5673.79
																								4.27673	4.25919	5674.67
																								4.28683	4.26929	5675.47
																								4.30666	4.28912	5676.9
																								4.31679	4.29925	5677.57
																								4.32679	4.30926	5677.99
																								4.34675	4.32921	5678.51
																								4.35678	4.33925	5678.78
																								4.37657	4.35904	5679.36
																								4.38674	4.36921	5679.6
																								4.40663	4.38909	5679.56
																								4.41685	4.39932	5679.48
																								4.42693	4.4094	5679.43
																								4.44646	4.42892	5679.14
																								4.45648	4.43894	5678.83
																								4.4665	4.44897	5678.33
																								4.47655	4.45901	5677.57
																								4.48671	4.46917	5676.64
																								4.49682	4.47929	5675.64
																								4.50687	4.48934	5674.53
																								4.51684	4.4993	5673.25
																								4.52679	4.50926	5671.77
																								4.53668	4.51914	5669.99
																								4.54657	4.52903	5667.88
																								4.55654	4.539	5665.48
																								4.56664	4.54911	5662.86
																								4.57671	4.55918	5660
																								4.58662	4.56909	5656.79
																								4.59667	4.57913	5653.12
																								4.60685	4.58931	5648.97
																								4.61691	4.59937	5644.37
																								4.62677	4.60924	5639.27
																								4.63654	4.61901	5633.66
																								4.64645	4.62891	5627.63
																								4.65649	4.63896	5621.14
																								4.66661	4.64908	5613.98
																								4.67658	4.65905	5606.12
																								4.68659	4.66906	5597.69
																								4.69685	4.67932	5588.66
																								4.70693	4.68939	5578.9
																								4.7168	4.69927	5568.05
																								4.72672	4.70919	5555.47
																								4.7367	4.71916	5540.77
																								4.74659	4.72906	5523.74
																								4.75662	4.73909	5504.37
																								4.76677	4.74923	5482.97
																								4.77677	4.75924	5459.75
																								4.78678	4.76924	5434.98
																								4.79687	4.77934	5409.07
																								4.80692	4.78939	5382.33
																								4.81674	4.7992	5355.34
																								4.8266	4.80906	5329.12
																								4.83673	4.81919	5304.38
																								4.84685	4.82931	5281.56
																								4.85671	4.83917	5260.89
																								4.86659	4.84905	5242.47
																								4.8767	4.85917	5226.24
																								4.88683	4.8693	5212.03

## Sheet: BH 7
BH 7 (1000 N)				BH 7 (1500 N)				BH 7 (2000 N)				BH 7 (3000 N)				BH 7 (4000 N)				BH 7 (5000 N)
Standard travel	Displacement corrected	Standard force		Standard travel	Displacement corrected	Standard force		Standard travel	Displacement corrected	Standard force		Standard travel	Displacement corrected	Standard force		Standard travel	Displacement corrected	Standard force		Standard travel	Displacement corrected	Standard force
mm	mm	N		mm	mm	N		mm	mm	N		mm	mm	N		mm	mm	N		mm	mm	N
0	-0.0240579	125.196		0	-0.0249076	126.363		0	-0.0257643	125.185		0	-0.0248457	127.451		0	-0.0271877	124.214		0	-0.0334893	123.346
-3.67999e-06	-0.0240615	124.09		1.88828e-06	-0.0249057	125.323		-3.88384e-06	-0.0257682	124.158		-7.9608e-06	-0.0248537	126.346		1.50204e-06	-0.0271862	123.173		-8.21829e-06	-0.0334975	122.257
-2.12431e-06	-0.02406	123.059		3.96967e-07	-0.0249072	124.197		-7.42435e-06	-0.0257717	123.051		-1.76382e-05	-0.0248634	125.16		-1.12653e-06	-0.0271888	122.076		-9.69887e-06	-0.033499	121.257
-3.85165e-06	-0.0240617	121.939		-1.18017e-07	-0.0249077	123.14		-3.66926e-06	-0.025768	122.016		-1.6973e-05	-0.0248627	124.099		-6.63042e-06	-0.0271943	121.074		-2.002e-05	-0.0335093	120.187
-3.16501e-06	-0.024061	120.878		-4.82798e-07	-0.0249081	122.034		-5.49316e-06	-0.0257698	120.937		-1.69408e-05	-0.0248627	122.992		-2.28524e-06	-0.02719	120.053		-1.99234e-05	-0.0335092	119.085
-6.90937e-06	-0.0240648	119.876		-4.83871e-06	-0.0249124	121.017		1.57607e-05	-0.0257485	119.875		-1.9623e-05	-0.0248654	121.966		0.000771993	-0.0264157	119.636		-2.41077e-05	-0.0335134	118.081
0.00223865	-0.0218192	120.644		0.00266926	-0.0222383	122.427		0.00222359	-0.0235407	120.97		0.00262128	-0.0222245	123.088		0.00265121	-0.0245365	120.981		0.00308357	-0.0304057	119.317
0.00391312	-0.0201447	122.348		0.00435715	-0.0205504	124.246		0.0037932	-0.0219711	122.48		0.00429107	-0.0205547	124.725		0.00433637	-0.0228513	122.685		0.00487385	-0.0286154	120.934
0.00487368	-0.0191842	123.499		0.00535983	-0.0195477	125.428		0.0047131	-0.0210512	123.503		0.00527645	-0.0195693	125.806		0.00533223	-0.0218555	123.788		0.00593076	-0.0275585	121.961
0.00593338	-0.0181245	124.856		0.00644092	-0.0184667	126.799		0.00573796	-0.0200263	124.709		0.00635509	-0.0184907	127.052		0.00641559	-0.0207721	125.058		0.00706424	-0.0264251	123.132
0.00707557	-0.0169823	126.399		0.00761993	-0.0172876	128.336		0.00686722	-0.0188971	126.091		0.0075336	-0.0173121	128.461		0.00759354	-0.0195942	126.497		0.00829087	-0.0251984	124.437
0.00833848	-0.0157194	128.124		0.00890393	-0.0160036	130.03		0.00809822	-0.0176661	127.639		0.00882272	-0.016023	130.015		0.00888055	-0.0183072	128.081		0.00962688	-0.0238624	125.852
0.00969337	-0.0143645	129.997		0.0102788	-0.0146288	131.857		0.00943529	-0.016329	129.34		0.0102184	-0.0146274	131.689		0.0102503	-0.0169374	129.789		0.0110612	-0.0224282	127.38
0.0111651	-0.0128928	131.999		0.0117555	-0.0131521	133.809		0.0108731	-0.0148912	131.164		0.0117164	-0.0131293	133.474		0.0117106	-0.0154771	131.61		0.0125861	-0.0209032	129.004
0.012716	-0.0113419	134.139		0.0133244	-0.0115832	135.868		0.0123883	-0.013376	133.106		0.013296	-0.0115497	135.368		0.0132889	-0.0138988	133.528		0.0142142	-0.0192751	130.717
0.0143706	-0.0096873	136.413		0.0149899	-0.00991769	138.047		0.0139881	-0.0117762	135.159		0.0149774	-0.00986831	137.358		0.014958	-0.0122297	135.551		0.0159722	-0.0175171	132.517
0.0161155	-0.00794237	138.82		0.0167559	-0.0081517	140.356		0.0157015	-0.0100627	137.323		0.0167439	-0.00810183	139.458		0.0167234	-0.0104643	137.688		0.0178373	-0.015652	134.415
0.0179478	-0.00611007	141.364		0.0186285	-0.00627911	142.788		0.0175091	-0.0082552	139.596		0.0186133	-0.00623244	141.664		0.0186085	-0.00857916	139.928		0.0197842	-0.0137051	136.4
0.0198914	-0.00416641	144.038		0.0206137	-0.00429384	145.34		0.0194132	-0.00635109	141.977		0.0205866	-0.00425917	143.973		0.020602	-0.00658576	142.275		0.0218306	-0.0116587	138.488
0.0219159	-0.00214197	146.83		0.0227099	-0.00219769	148.01		0.0214178	-0.0043465	144.466		0.0226589	-0.00218683	146.382		0.0226871	-0.00450064	144.724		0.0239575	-0.00953176	140.67
0.0240579	0	149.738		0.0249076	0	150.8		0.0235233	-0.00224097	147.069		0.0248457	0	148.889		0.0248917	-0.002296	147.273		0.0261864	-0.00730292	142.945
0.0263015	0.00224364	152.757		0.0272057	0.0022981	153.709		0.0257643	0	149.782		0.0271662	0.0023205	151.491		0.0271877	0	149.924		0.0285093	-0.00497997	145.31
0.0286548	0.00459697	155.89		0.029593	0.00468541	156.746		0.0280837	0.00231944	152.611		0.0295935	0.0047478	154.2		0.0295768	0.00238913	152.688		0.0309414	-0.00254793	147.754
0.0311048	0.00704698	159.147		0.0320693	0.00716169	159.912		0.0305085	0.00474416	155.559		0.0320818	0.00723604	157.012		0.032036	0.0048483	155.561		0.0334893	0	150.268
0.0336235	0.00956559	162.524		0.0346482	0.00974059	163.202		0.0330273	0.00726303	158.634		0.0346606	0.00981489	159.929		0.0345794	0.00739172	158.544		0.0361533	0.00266401	152.867
0.0362394	0.0121815	166.026		0.0373328	0.0124252	166.608		0.0356337	0.00986944	161.841		0.0373289	0.0124831	162.956		0.037234	0.0100463	161.62		0.0389043	0.00541501	155.547
0.0389518	0.014894	169.65		0.0401358	0.0152282	170.114		0.0383313	0.012567	165.164		0.0400731	0.0152274	166.09		0.040024	0.0128363	164.778		0.0417267	0.0082374	158.308
0.0418011	0.0177433	173.382		0.0430775	0.0181699	173.73		0.0411659	0.0154016	168.592		0.0429324	0.0180866	169.316		0.0429321	0.0157444	168.035		0.0446362	0.0111469	161.16
0.0447615	0.0207036	177.22		0.0461122	0.0212046	177.459		0.044137	0.0183727	172.124		0.0459051	0.0210594	172.638		0.0459359	0.0187482	171.392		0.0476657	0.0141764	164.094
0.0478587	0.0238008	181.164		0.0491837	0.0242761	181.315		0.047231	0.0214667	175.759		0.0489996	0.0241539	176.071		0.0490075	0.0218197	174.861		0.0508411	0.0173518	167.096
0.0510457	0.0269879	185.242		0.0523316	0.0274241	185.309		0.0503997	0.0246354	179.489		0.052188	0.0273422	179.627		0.0521615	0.0249738	178.447		0.0541459	0.0206565	170.175
0.0542654	0.0302075	189.447		0.0555606	0.030653	189.422		0.0536201	0.0278558	183.337		0.0554524	0.0306066	183.31		0.0554123	0.0282246	182.134		0.057532	0.0240427	173.331
0.0575489	0.033491	193.78		0.0589	0.0339924	193.633		0.0569064	0.0311421	187.283		0.0587882	0.0339424	187.114		0.0588057	0.031618	185.91		0.0609531	0.0274638	176.566
0.0609205	0.0368626	198.23		0.0623901	0.0374825	197.932		0.0602918	0.0345275	191.317		0.0622426	0.0373969	191.03		0.0623618	0.0351741	189.774		0.0644588	0.0309695	179.883
0.0644343	0.0403765	202.787		0.0660028	0.0410953	202.351		0.0637962	0.0380319	195.44		0.0658166	0.0409708	195.056		0.0660321	0.0388444	193.732		0.068075	0.0345857	183.285
0.0680767	0.0440188	207.465		0.0696788	0.0447713	206.887		0.0674334	0.0416692	199.652		0.0695393	0.0446936	199.2		0.0697301	0.0425424	197.803		0.0718037	0.0383144	186.767
0.0718025	0.0477446	212.276		0.0733657	0.0484581	211.549		0.0711488	0.0453845	203.976		0.0733253	0.0484796	203.463		0.0734713	0.0462836	201.984		0.0756462	0.0421569	190.34
0.0755872	0.0515293	217.233		0.0771563	0.0522487	216.334		0.0749027	0.0491384	208.408		0.0771753	0.0523296	207.853		0.0772987	0.050111	206.263		0.079565	0.0460757	194.01
0.0794658	0.055408	222.334		0.0811217	0.0562141	221.245		0.0787542	0.0529899	212.947		0.0811209	0.0562752	212.349		0.081266	0.0540783	210.64		0.0835904	0.0501011	197.763
0.0834684	0.0594105	227.595		0.0852105	0.0603029	226.275		0.0827502	0.0569859	217.6		0.085222	0.0603762	216.946		0.085354	0.0581663	215.134		0.0876921	0.0542028	201.61
0.0876051	0.0635473	232.995		0.0893718	0.0644643	231.432		0.0868916	0.0611273	222.396		0.0894722	0.0646265	221.644		0.089491	0.0623033	219.742		0.0919465	0.0584572	205.566
0.0918387	0.0677809	238.543		0.0936051	0.0686976	236.707		0.0910961	0.0653318	227.329		0.0937909	0.0689451	226.447		0.0936837	0.066496	224.466		0.0963184	0.0628291	209.633
0.0961593	0.0721014	244.206		0.0979664	0.0730588	242.111		0.0953654	0.0696011	232.404		0.0981452	0.0732995	231.354		0.0980073	0.0708196	229.314		0.100753	0.0672637	213.783
0.100599	0.0765407	249.994		0.102487	0.0775798	247.658		0.0997582	0.0739939	237.614		0.102559	0.0777129	236.39		0.102478	0.0752907	234.286		0.10525	0.0717609	218.017
0.105208	0.0811503	255.923		0.107134	0.082226	253.336		0.104314	0.0785493	242.966		0.107113	0.0822668	241.561		0.107072	0.0798847	239.386		0.109927	0.0764373	222.337
0.109935	0.0858772	261.994		0.11181	0.0869029	259.158		0.108982	0.0832174	248.455		0.111793	0.0869471	246.858		0.11175	0.0845628	244.593		0.114762	0.0812729	226.743
0.114667	0.0906094	268.204		0.116528	0.0916205	265.147		0.11371	0.0879457	254.052		0.116571	0.091725	252.268		0.116533	0.0893453	249.912		0.119625	0.0861353	231.231
0.119454	0.0953957	274.546		0.121394	0.0964868	271.317		0.118472	0.0927074	259.783		0.121484	0.0966387	257.807		0.121457	0.0942696	255.365		0.124478	0.0909885	235.799
0.124389	0.100332	281.037		0.126384	0.101476	277.627		0.123372	0.0976077	265.679		0.126558	0.101712	263.509		0.126491	0.0993033	260.955		0.129463	0.0959741	240.46
0.129479	0.105421	287.65		0.131427	0.10652	284.041		0.12843	0.102665	271.721		0.131676	0.10683	269.371		0.131575	0.104387	266.646		0.134601	0.101112	245.215
0.134662	0.110604	294.372		0.136682	0.111774	290.56		0.133532	0.107768	277.867		0.136806	0.111961	275.369		0.136689	0.109501	272.456		0.13985	0.106361	250.039
0.139971	0.115913	301.216		0.142139	0.117232	297.225		0.13876	0.112995	284.111		0.142017	0.117171	281.484		0.141976	0.114788	278.392		0.145222	0.111732	254.94
0.145421	0.121363	308.22		0.147602	0.122694	304.027		0.14417	0.118406	290.475		0.147388	0.122542	287.725		0.147399	0.120212	284.446		0.150731	0.117242	259.945
0.150927	0.126869	315.356		0.153008	0.128101	310.962		0.149643	0.123878	296.976		0.152853	0.128007	294.083		0.152903	0.125716	290.609		0.15633	0.12284	265.049
0.156408	0.132351	322.603		0.158528	0.133621	318.031		0.155119	0.129355	303.621		0.158373	0.133527	300.57		0.158545	0.131357	296.908		0.161917	0.128428	270.226
0.161954	0.137896	329.952		0.164195	0.139287	325.21		0.160703	0.134939	310.421		0.164018	0.139172	307.211		0.164279	0.137091	303.337		0.167584	0.134095	275.481
0.167685	0.143627	337.406		0.169891	0.144983	332.496		0.166409	0.140644	317.396		0.169771	0.144925	313.993		0.17003	0.142842	309.895		0.173402	0.139912	280.815
0.173463	0.149405	344.968		0.175706	0.150799	339.92		0.17219	0.146426	324.529		0.175602	0.150756	320.902		0.175797	0.148609	316.567		0.179293	0.145804	286.23
0.179276	0.155219	352.656		0.181691	0.156783	347.519		0.178057	0.152293	331.802		0.18158	0.156734	327.945		0.181747	0.154559	323.344		0.185249	0.15176	291.742
0.185253	0.161195	360.471		0.187721	0.162813	355.302		0.184095	0.158331	339.207		0.187761	0.162915	335.136		0.187803	0.160616	330.259		0.19138	0.157891	297.347
0.191353	0.167295	368.399		0.193834	0.168926	363.249		0.190236	0.164471	346.742		0.193959	0.169113	342.501		0.193887	0.166699	337.324		0.197602	0.164113	303.035
0.197549	0.173491	376.43		0.200158	0.175251	371.34		0.196456	0.170691	354.428		0.200179	0.175334	350.04		0.200099	0.172911	344.524		0.203927	0.170437	308.808
0.203953	0.179896	384.59		0.206582	0.181674	379.607		0.202854	0.177089	362.278		0.206569	0.181724	357.718		0.206436	0.179248	351.846		0.210461	0.176971	314.691
0.210479	0.186421	392.92		0.213044	0.188136	388.049		0.209299	0.183535	370.296		0.213054	0.188208	365.536		0.212879	0.185691	359.312		0.217067	0.183578	320.716
0.216977	0.192919	401.419		0.219625	0.194717	396.646		0.215735	0.18997	378.472		0.2197	0.194854	373.493		0.219569	0.192382	366.937		0.223643	0.190154	326.88
0.223586	0.199528	410.033		0.226281	0.201374	405.41		0.222303	0.196539	386.791		0.226477	0.201632	381.574		0.226355	0.199167	374.768		0.230341	0.196852	333.128
0.230328	0.20627	418.758		0.233109	0.208201	414.337		0.229037	0.203273	395.273		0.233209	0.208363	389.804		0.233074	0.205887	382.786		0.237153	0.203664	339.463
0.237264	0.213206	427.6		0.240093	0.215185	423.403		0.235935	0.210171	403.92		0.240028	0.215183	398.178		0.239902	0.212714	390.939		0.244207	0.210718	345.89
0.244388	0.22033	436.515		0.247076	0.222169	432.625		0.242947	0.217183	412.706		0.246984	0.222139	406.708		0.246915	0.219727	399.231		0.251407	0.217918	352.411
0.251449	0.227392	445.52		0.254114	0.229206	442.017		0.249931	0.224167	421.655		0.25399	0.229144	415.424		0.25418	0.226992	407.645		0.258481	0.224992	359.034
0.2585	0.234442	454.641		0.261251	0.236343	451.59		0.256999	0.231235	430.786		0.261144	0.236299	424.303		0.261585	0.234397	416.181		0.26559	0.2321	365.774
0.265706	0.241648	463.905		0.268471	0.243563	461.332		0.26419	0.238426	440.115		0.268369	0.243524	433.315		0.268838	0.24165	424.86		0.272865	0.239376	372.647
0.272961	0.248903	473.315		0.275836	0.250929	471.192		0.27142	0.245656	449.634		0.275738	0.250892	442.486		0.276079	0.248892	433.698		0.280255	0.246765	379.654
0.280354	0.256296	482.825		0.283339	0.258432	481.177		0.278794	0.25303	459.297		0.283299	0.258453	451.849		0.283418	0.25623	442.7		0.287788	0.254298	386.739
0.287798	0.263741	492.416		0.290978	0.266071	491.336		0.286266	0.260502	469.109		0.291001	0.266156	461.416		0.290904	0.263716	451.853		0.295387	0.261898	393.9
0.295399	0.271342	502.139		0.298736	0.273828	501.691		0.29387	0.268105	479.108		0.298717	0.273871	471.15		0.298573	0.271385	461.112		0.303161	0.269672	401.206
0.303222	0.279164	512.017		0.306459	0.281552	512.235		0.301716	0.275952	489.308		0.306389	0.281543	481.041		0.306262	0.279074	470.476		0.311124	0.277635	408.673
0.3111	0.287042	522.037		0.314245	0.289338	522.956		0.309528	0.283764	499.658		0.314291	0.289446	491.106		0.314124	0.286936	480.011		0.31914	0.285651	416.269
0.318978	0.29492	532.199		0.322224	0.297316	533.846		0.317383	0.291619	510.14		0.322411	0.297565	501.371		0.322153	0.294965	489.732		0.327132	0.293642	423.957
0.326951	0.302893	542.504		0.330419	0.305511	544.875		0.325379	0.299615	520.773		0.330536	0.30569	511.803		0.330319	0.303132	499.611		0.335238	0.301748	431.741
0.335199	0.311141	552.984		0.338677	0.313769	556.051		0.333666	0.307902	531.603		0.338606	0.31376	522.397		0.338505	0.311317	509.647		0.343613	0.310123	439.649
0.343535	0.319477	563.636		0.346907	0.321999	567.398		0.341969	0.316205	542.603		0.346695	0.321849	533.188		0.346805	0.319617	519.83		0.352021	0.318532	447.676
0.351855	0.327797	574.421		0.355228	0.33032	578.979		0.350156	0.324392	553.756		0.35501	0.330164	544.19		0.355293	0.328106	530.187		0.360387	0.326898	455.792
0.360206	0.336148	585.334		0.363618	0.33871	590.744		0.358437	0.332672	565.162		0.363568	0.338722	555.394		0.363811	0.336623	540.714		0.368761	0.335272	464.032
0.368667	0.344609	596.365		0.372126	0.347219	602.687		0.36687	0.341106	576.821		0.372225	0.347379	566.783		0.372402	0.345215	551.379		0.37726	0.343771	472.39
0.377354	0.353296	607.532		0.380738	0.35583	614.834		0.375505	0.349741	588.634		0.380908	0.356063	578.384		0.381008	0.35382	562.166		0.386021	0.352532	480.884
0.386183	0.362125	618.841		0.389572	0.364664	627.214		0.384166	0.358402	600.564		0.389638	0.364792	590.2		0.389676	0.362488	573.103		0.394957	0.361468	489.514
0.395084	0.371026	630.305		0.398484	0.373576	639.763		0.393034	0.36727	612.721		0.398552	0.373707	602.24		0.398538	0.371351	584.219		0.403938	0.370449	498.272
0.403968	0.37991	641.944		0.407358	0.382451	652.43		0.402135	0.376371	625.133		0.407647	0.382801	614.402		0.407573	0.380385	595.533		0.412917	0.379427	507.174
0.412921	0.388863	653.78		0.416401	0.391493	665.294		0.411243	0.385479	637.746		0.416811	0.391965	626.682		0.416605	0.389417	607.082		0.422065	0.388576	516.236
0.422112	0.398054	665.749		0.425798	0.400891	678.362		0.420264	0.394499	650.525		0.425884	0.401038	639.14		0.425606	0.398418	618.848		0.431454	0.397965	525.402
0.431449	0.407391	677.776		0.435214	0.410306	691.617		0.429562	0.403797	663.512		0.435106	0.41026	651.833		0.434801	0.407613	630.819		0.440864	0.407374	534.628
0.440762	0.416704	689.887		0.444467	0.41956	705.086		0.438998	0.413234	676.716		0.444366	0.41952	664.737		0.444284	0.417097	642.942		0.450173	0.416684	543.982
0.450168	0.42611	702.169		0.453821	0.428914	718.839		0.448357	0.422593	690.06		0.453677	0.428831	677.836		0.453882	0.426694	655.223		0.459665	0.426176	553.477
0.459696	0.435638	714.632		0.463375	0.438468	732.786		0.457671	0.431906	703.523		0.463137	0.438292	691.191		0.463488	0.4363	667.716		0.469197	0.435708	563.101
0.46922	0.445162	727.227		0.47299	0.448083	746.832		0.46719	0.441426	717.184		0.472957	0.448112	704.761		0.473209	0.446021	680.418		0.478769	0.44528	572.837
0.478822	0.454764	739.954		0.482746	0.457838	760.989		0.476976	0.451212	731.066		0.482822	0.457976	718.469		0.482928	0.45574	693.315		0.488534	0.455045	582.698
0.48874	0.464682	752.799		0.49278	0.467872	775.288		0.486902	0.461138	745.1		0.492661	0.467815	732.274		0.492757	0.465569	706.399		0.498659	0.46517	592.665
0.498798	0.474741	765.653		0.502868	0.47796	789.715		0.496787	0.471023	759.271		0.502786	0.47794	746.251		0.502826	0.475639	719.628		0.508656	0.475167	602.669
0.508677	0.484619	778.46		0.512778	0.48787	804.238		0.506704	0.48094	773.597		0.513062	0.488216	760.383		0.512894	0.485706	732.892		0.518546	0.485057	612.681
0.518632	0.494574	791.266		0.52282	0.497912	818.874		0.516817	0.491053	788.01		0.522992	0.498147	774.652		0.522744	0.495556	746.173		0.528727	0.495238	622.771
0.528879	0.504821	804.11		0.532908	0.508	833.605		0.526918	0.501154	802.45		0.532766	0.50792	789.028		0.532682	0.505495	759.527		0.539026	0.505537	632.933
0.538862	0.514804	816.991		0.542803	0.517896	848.305		0.536828	0.511064	816.971		0.542633	0.517788	803.484		0.542876	0.515688	772.991		0.54897	0.51548	643.146
0.548664	0.524606	829.869		0.552588	0.52768	862.875		0.546756	0.520991	831.596		0.552535	0.527689	817.986		0.552823	0.525635	786.548		0.55871	0.52522	653.392
0.558517	0.534459	842.718		0.562537	0.537629	877.392		0.556578	0.530813	846.292		0.562449	0.537603	832.482		0.562574	0.535386	800.204		0.568616	0.535127	663.682
0.568465	0.544407	855.515		0.572634	0.547727	891.925		0.566381	0.540617	861.07		0.57251	0.547664	846.994		0.572463	0.545275	813.947		0.578527	0.545038	673.973
0.578445	0.554387	868.249		0.58266	0.557752	906.493		0.57634	0.550575	875.971		0.582603	0.557758	861.569		0.582503	0.555315	827.732		0.588483	0.554994	684.244
0.588567	0.564509	880.908		0.592457	0.567549	921.161		0.586542	0.560778	890.911		0.592628	0.567782	876.224		0.592489	0.565301	841.509		0.598561	0.565071	694.516
0.598734	0.574676	893.557		0.602219	0.577312	935.891		0.596563	0.570799	905.846		0.602763	0.577917	890.967		0.602616	0.575428	855.296		0.608633	0.575144	704.842
0.608737	0.584679	906.222		0.612122	0.587215	950.614		0.606551	0.580786	920.795		0.612871	0.588025	905.801		0.612829	0.585642	869.153		0.618647	0.585158	715.239
0.618806	0.594749	918.927		0.622151	0.597243	965.32		0.616825	0.591061	935.851		0.622859	0.598013	920.649		0.622871	0.595683	883.063		0.62876	0.59527	725.703
0.628872	0.604814	931.665		0.632311	0.607403	980.068		0.627039	0.601275	950.991		0.632681	0.607835	935.459		0.632865	0.605677	897.019		0.638838	0.605348	736.222
0.638823	0.614765	944.388		0.642428	0.617521	994.879		0.636914	0.611149	966.194		0.642598	0.617753	950.303		0.642852	0.615665	911.055		0.648791	0.615302	746.71
0.648664	0.624606	957.043		0.652336	0.627429	1009.82		0.646675	0.620911	981.447		0.652662	0.627816	965.24		0.65278	0.625593	925.134		0.658641	0.625152	757.17
0.658565	0.634507	969.428		0.662235	0.637327	1024.92		0.656612	0.630848	996.748		0.662645	0.6378	980.249		0.662534	0.635347	939.168		0.668642	0.635153	767.672
0.668618	0.64456	980.676		0.672358	0.64745	1040.13		0.666508	0.640744	1012.05		0.672478	0.647633	995.351		0.672339	0.645151	953.214		0.67869	0.6452	778.245
0.678705	0.654647	990.237		0.682493	0.657586	1055.26		0.676474	0.65071	1027.31		0.682377	0.657531	1010.52		0.682376	0.655188	967.371		0.688633	0.655144	788.87
0.688669	0.664611	998.104		0.692496	0.667588	1070.26		0.68658	0.660815	1042.58		0.692477	0.667631	1025.72		0.692508	0.66532	981.638		0.698442	0.664953	799.556
0.697719	0.673661	1004.38		0.702651	0.677744	1085.24		0.696636	0.670871	1057.91		0.702604	0.677758	1040.95		0.702514	0.675326	995.967		0.708411	0.674921	810.269
0.702835	0.678777	1009.05		0.712955	0.688048	1100.24		0.706661	0.680897	1073.33		0.712657	0.687811	1056.25		0.712543	0.685356	1010.36		0.718571	0.685082	820.972
0.704457	0.680399	1012.05		0.722939	0.698031	1115.24		0.716814	0.69105	1088.81		0.722671	0.697826	1071.62		0.722762	0.695574	1024.81		0.728653	0.695164	831.674
0.705251	0.681193	1013.42		0.732752	0.707844	1130.26		0.726883	0.701119	1104.35		0.732596	0.70775	1087.08		0.732966	0.705778	1039.27		0.738694	0.705205	842.427
0.706484	0.682426	1011.34		0.742638	0.71773	1145.28		0.736791	0.711026	1119.86		0.742566	0.71772	1102.66		0.742964	0.715776	1053.77		0.748677	0.715188	853.242
0.70675	0.682692	1008.21		0.752541	0.727633	1160.24		0.746646	0.720882	1135.32		0.752752	0.727906	1118.3		0.75291	0.725722	1068.32		0.758586	0.725097	864.129
0.706914	0.682856	1004.69		0.762441	0.737533	1175.1		0.756643	0.730878	1150.83		0.762828	0.737983	1133.89		0.762713	0.735525	1082.93		0.768554	0.735065	875.087
0.706997	0.682939	1001.29		0.772564	0.747657	1189.91		0.7667	0.740936	1166.42		0.772652	0.747806	1149.43		0.772501	0.745314	1097.63		0.778726	0.745237	886.045
0.707046	0.682988	998.059		0.782682	0.757774	1204.7		0.776617	0.750853	1182.07		0.782651	0.757805	1165.02		0.782475	0.755287	1112.39		0.788774	0.755285	896.938
0.707072	0.683015	994.935		0.792633	0.767726	1219.51		0.786434	0.76067	1197.82		0.792861	0.768016	1180.69		0.792602	0.765414	1127.15		0.798664	0.765175	907.8
0.707097	0.683039	991.916		0.802714	0.777807	1234.33		0.796436	0.770671	1213.62		0.802774	0.777929	1196.44		0.802568	0.77538	1141.89		0.808728	0.775239	918.729
0.707098	0.68304	989.03		0.812862	0.787954	1249.2		0.806571	0.780806	1229.41		0.812557	0.787711	1212.28		0.812535	0.785347	1156.66		0.81888	0.78539	929.742
0.7071	0.683042	986.255		0.822834	0.797926	1264.01		0.816616	0.790852	1245.21		0.822454	0.797608	1228.2		0.822823	0.795636	1171.51		0.828699	0.79521	940.826
0.707095	0.683037	983.6		0.832648	0.80774	1278.69		0.82668	0.800915	1261.08		0.83244	0.807595	1244.14		0.832958	0.80577	1186.44		0.838492	0.805002	951.981
0.707093	0.683035	981.057		0.842575	0.817667	1293.33		0.836698	0.810934	1277		0.84245	0.817604	1260.06		0.842808	0.81562	1201.43		0.848489	0.815	963.182
0.707088	0.68303	978.609		0.852663	0.827755	1308.01		0.846617	0.820853	1292.99		0.852644	0.827798	1275.98		0.852673	0.825485	1216.5		0.858516	0.825027	974.368
0.707083	0.683025	976.245		0.862676	0.837768	1322.69		0.856621	0.830856	1308.98		0.862831	0.837986	1291.96		0.862616	0.835428	1231.61		0.86855	0.835061	985.529
0.707084	0.683026	973.969		0.872518	0.847611	1337.39		0.866804	0.84104	1324.86		0.872831	0.847985	1307.99		0.872484	0.845296	1246.74		0.878737	0.845248	996.723
0.707076	0.683018	971.773		0.882435	0.857528	1352.11		0.876773	0.851009	1340.54		0.882843	0.857997	1324.09		0.882458	0.85527	1261.87		0.888878	0.855389	1007.98
0.707073	0.683015	969.639		0.892545	0.867638	1366.77		0.886612	0.860848	1356.12		0.892835	0.867989	1340.28		0.89257	0.865382	1277.05		0.898823	0.865334	1019.3
				0.902641	0.877734	1381.35		0.896643	0.870879	1371.75		0.902721	0.877875	1356.51		0.902573	0.875385	1292.32		0.908811	0.875322	1030.69
				0.912677	0.88777	1395.92		0.906533	0.880769	1387.5		0.912449	0.887603	1372.68		0.912597	0.885409	1307.7		0.918764	0.885275	1042.13
				0.922747	0.89784	1410.54		0.916137	0.890372	1403.33		0.922306	0.897461	1388.89		0.922706	0.895518	1323.21		0.928621	0.895132	1053.57
				0.932668	0.90776	1425.18		0.92581	0.900046	1419.22		0.932384	0.907538	1405.23		0.932702	0.905515	1338.81		0.938403	0.904914	1064.97
				0.942524	0.917617	1439.86		0.935836	0.910072	1435.15		0.942537	0.917691	1421.68		0.942598	0.91541	1354.38		0.948347	0.914858	1076.44
				0.952648	0.92774	1454.52		0.946064	0.920299	1451.05		0.952568	0.927722	1438.24		0.952571	0.925383	1369.93		0.958464	0.924974	1088.02
				0.962808	0.937901	1468.51		0.956307	0.930543	1466.93		0.962588	0.937742	1454.85		0.962671	0.935483	1385.55		0.968552	0.935063	1099.66
				0.97271	0.947802	1480.77		0.966578	0.940813	1482.92		0.972791	0.947946	1471.51		0.972804	0.945616	1401.24		0.978531	0.945042	1111.38
				0.982645	0.957737	1491.05		0.976762	0.950998	1499.03		0.982955	0.958109	1488.17		0.982777	0.95559	1417.02		0.988627	0.955138	1123.14
				0.992842	0.967934	1499.48		0.986801	0.961036	1515.17		0.992937	0.968091	1504.88		0.992625	0.965437	1432.91		0.998826	0.965337	1134.89
				1.00096	0.976048	1506.08		0.99678	0.971016	1531.31		1.00285	0.978009	1521.65		1.00266	0.975467	1448.85		1.00889	0.975401	1146.61
				1.00445	0.979539	1510.73		1.00673	0.980962	1547.41		1.01263	0.987789	1538.48		1.01278	0.985597	1464.76		1.0189	0.985412	1158.36
				1.00553	0.980626	1513.49		1.01662	0.990853	1563.4		1.02243	0.99758	1555.42		1.02273	0.995547	1480.68		1.02885	0.99536	1170.16
				1.0075	0.982589	1510.53		1.0264	1.00063	1579.29		1.03246	1.00762	1572.45		1.03275	1.00556	1496.7		1.03864	1.00515	1182.02
				1.00774	0.982837	1506.5		1.03633	1.01056	1595.2		1.04258	1.01773	1589.44		1.0427	1.01551	1512.82		1.04844	1.01495	1193.96
				1.00789	0.982984	1502.32		1.04642	1.02066	1611.17		1.0525	1.02765	1606.41		1.05252	1.02533	1529.07		1.05849	1.025	1205.95
				1.00797	0.983066	1498.33		1.05653	1.03077	1627.18		1.06253	1.03768	1623.41		1.06246	1.03528	1545.46		1.06856	1.03507	1217.94
				1.00804	0.983128	1494.46		1.06654	1.04078	1643.2		1.07286	1.04801	1640.48		1.07267	1.04548	1561.88		1.07848	1.04499	1229.9
				1.00806	0.983155	1490.69		1.07664	1.05087	1659.17		1.08293	1.05809	1657.65		1.08266	1.05547	1578.24		1.08856	1.05507	1241.91
				1.00808	0.983173	1487.03		1.08688	1.06112	1675.06		1.09277	1.06793	1674.9		1.09255	1.06537	1594.57		1.09886	1.06537	1254
				1.00809	0.983179	1483.49		1.09699	1.07123	1690.92		1.10264	1.0778	1692.22		1.10275	1.07556	1611		1.1089	1.07541	1266.17
				1.0081	0.983189	1480.08		1.10696	1.08119	1706.77		1.11255	1.0877	1709.57		1.11289	1.0857	1627.53		1.11877	1.08528	1278.43
				1.0081	0.983188	1476.78		1.11677	1.09101	1722.59		1.12243	1.09758	1726.88		1.12269	1.0955	1644.17		1.12865	1.09516	1290.74
				1.0081	0.983189	1473.61		1.12653	1.10077	1738.42		1.13248	1.10763	1744.12		1.1325	1.10531	1660.86		1.13855	1.10506	1303.07
				1.00809	0.983181	1470.54		1.13641	1.11064	1754.27		1.14257	1.11773	1761.32		1.1425	1.11531	1677.61		1.14844	1.11495	1315.39
				1.00809	0.983178	1467.57		1.14652	1.12076	1770.08		1.15254	1.1277	1778.46		1.15246	1.12528	1694.36		1.1585	1.12501	1327.71
				1.00808	0.983169	1464.69		1.15658	1.13082	1785.77		1.1626	1.13776	1795.62		1.16252	1.13533	1711.09		1.16858	1.13509	1340.07
				1.00808	0.983171	1461.89		1.16651	1.14074	1801.4		1.17266	1.14782	1812.85		1.1727	1.14551	1727.86		1.17855	1.14506	1352.51
								1.17667	1.15091	1817.07		1.18254	1.15769	1830.12		1.18275	1.15557	1744.7		1.18861	1.15512	1365.05
								1.18692	1.16116	1832.75		1.19217	1.16733	1847.34		1.19275	1.16556	1761.6		1.1987	1.16521	1377.7
								1.19687	1.1711	1848.46		1.20194	1.1771	1864.57		1.20284	1.17565	1778.57		1.2087	1.17521	1390.36
								1.20673	1.18096	1864.19		1.21192	1.18708	1881.85		1.21286	1.18568	1795.58		1.21857	1.18508	1402.94
								1.21665	1.19089	1879.92		1.22205	1.1972	1899.14		1.22272	1.19553	1812.52		1.22857	1.19508	1415.51
								1.22647	1.20071	1895.59		1.23224	1.20739	1916.5		1.23255	1.20536	1829.44		1.23873	1.20524	1428.16
								1.2364	1.21063	1911.18		1.24236	1.21752	1933.99		1.24257	1.21538	1846.44		1.24883	1.21534	1440.84
								1.24654	1.22078	1926.74		1.25253	1.22769	1951.57		1.25265	1.22547	1863.53		1.25868	1.22519	1453.58
								1.2566	1.23083	1942.3		1.2626	1.23775	1969.11		1.26266	1.23547	1880.65		1.26859	1.2351	1466.41
								1.26654	1.24077	1957.69		1.27256	1.24772	1986.66		1.27259	1.2454	1897.84		1.27867	1.24518	1479.23
								1.27665	1.25088	1971.91		1.28264	1.25779	2004.17		1.28267	1.25548	1915.07		1.2887	1.25521	1492.01
								1.28671	1.26094	1984.07		1.29261	1.26776	2021.62		1.29281	1.26562	1932.3		1.29866	1.26517	1504.8
								1.29662	1.27085	1993.98		1.30245	1.2776	2039.05		1.30278	1.2756	1949.54		1.30872	1.27523	1517.65
								1.30603	1.28027	2001.72		1.31246	1.28762	2056.48		1.31271	1.28553	1966.85		1.31864	1.28515	1530.57
								1.31213	1.28636	2007.39		1.32267	1.29782	2073.82		1.32259	1.2954	1984.22		1.32849	1.295	1543.55
								1.31422	1.28846	2011		1.33262	1.30777	2090.95		1.33245	1.30527	2001.66		1.33854	1.30505	1556.48
								1.31499	1.28922	2012.52		1.34254	1.31769	2107.95		1.34241	1.31522	2019.12		1.34866	1.31518	1569.22
								1.31631	1.29054	2009.47		1.35278	1.32794	2124.93		1.35256	1.32537	2036.45		1.35858	1.32509	1581.86
								1.31666	1.29089	2005.11		1.36284	1.33799	2141.93		1.36256	1.33537	2053.56		1.36853	1.33504	1594.59
								1.31685	1.29108	1999.98		1.37259	1.34774	2158.91		1.37251	1.34532	2070.66		1.37859	1.3451	1607.49
								1.31695	1.29119	1994.94		1.38241	1.35756	2175.84		1.38266	1.35547	2087.94		1.38813	1.35464	1620.51
								1.31703	1.29126	1990.16		1.39241	1.36756	2192.7		1.39263	1.36544	2105.38		1.39759	1.3641	1633.59
								1.31707	1.2913	1985.51		1.40241	1.37757	2209.43		1.40212	1.37493	2122.94		1.40772	1.37423	1646.74
								1.31708	1.29132	1981		1.41253	1.38768	2225.99		1.41175	1.38457	2140.63		1.41812	1.38463	1659.96
								1.3171	1.29133	1976.64		1.42272	1.39787	2242.49		1.42198	1.39479	2158.42		1.42824	1.39475	1673.22
								1.3171	1.29134	1972.44		1.43276	1.40791	2258.99		1.43217	1.40498	2176.26		1.43834	1.40485	1686.6
								1.3171	1.29133	1968.38		1.44281	1.41796	2275.45		1.44225	1.41506	2194.21		1.44856	1.41507	1700.23
								1.3171	1.29133	1964.48		1.45282	1.42798	2291.85		1.45247	1.42528	2212.4		1.45866	1.42517	1713.97
								1.3171	1.29133	1960.7		1.46279	1.43794	2308.15		1.46256	1.43538	2230.86		1.46875	1.43526	1727.69
								1.31709	1.29133	1957.04		1.47266	1.44781	2324.26		1.47259	1.4454	2249.46		1.47878	1.44529	1741.38
								1.31709	1.29132	1953.49		1.48253	1.45769	2340.25		1.48276	1.45557	2268.14		1.48876	1.45527	1755.03
								1.31708	1.29131	1950.06		1.49253	1.46769	2356.22		1.49284	1.46565	2286.88		1.49864	1.46515	1768.64
								1.31707	1.29131	1946.71		1.50262	1.47777	2372.17		1.50269	1.4755	2305.59		1.50855	1.47506	1782.23
								1.31707	1.29131	1943.47		1.51264	1.48779	2388.09		1.51254	1.48535	2324.25		1.5186	1.48511	1795.87
								1.31706	1.2913	1940.3		1.52257	1.49773	2403.94		1.5226	1.49541	2342.99		1.52867	1.49518	1809.56
												1.53268	1.50784	2419.69		1.5327	1.50551	2361.84		1.5386	1.50512	1823.3
												1.54284	1.51799	2435.35		1.54262	1.51543	2380.76		1.54854	1.51505	1837.06
												1.55279	1.52794	2450.97		1.55247	1.52528	2399.8		1.55865	1.52516	1850.82
												1.56266	1.53781	2466.56		1.56247	1.53529	2418.91		1.56875	1.53526	1864.57
												1.57251	1.54766	2482.14		1.5726	1.54541	2438.01		1.57869	1.5452	1878.36
												1.5824	1.55756	2497.77		1.5826	1.55541	2457.02		1.58862	1.55513	1892.2
												1.5924	1.56755	2513.43		1.59267	1.56549	2476.07		1.59848	1.56499	1906.11
												1.60252	1.57767	2528.98		1.60274	1.57555	2495.18		1.60839	1.5749	1920.14
												1.61249	1.58765	2544.43		1.61263	1.58544	2514.34		1.61843	1.58494	1934.24
												1.62254	1.59769	2559.84		1.62254	1.59535	2533.57		1.62854	1.59505	1948.33
												1.63281	1.60797	2575.23		1.6327	1.60551	2552.73		1.63851	1.60502	1962.39
												1.6429	1.61805	2590.57		1.64273	1.61554	2571.69		1.64858	1.61509	1976.45
												1.65282	1.62797	2605.94		1.65259	1.6254	2590.44		1.65884	1.62536	1990.54
												1.66269	1.63784	2621.3		1.66272	1.63553	2609.11		1.66894	1.63545	2004.67
												1.67262	1.64777	2636.55		1.67289	1.64571	2627.75		1.67884	1.64535	2018.87
												1.68249	1.65764	2651.66		1.68273	1.65554	2646.34		1.6887	1.65521	2033.13
												1.69253	1.66769	2666.65		1.69248	1.66529	2664.84		1.69861	1.66512	2047.39
												1.70269	1.67784	2681.59		1.70247	1.67528	2683.2		1.70848	1.67499	2061.6
												1.71267	1.68782	2696.45		1.71248	1.6853	2701.31		1.71854	1.68505	2075.76
												1.72269	1.69784	2711.34		1.72253	1.69534	2719.06		1.72867	1.69518	2089.94
												1.73284	1.70799	2726.32		1.73269	1.7055	2736.51		1.73866	1.70517	2104.12
												1.74284	1.71799	2741.28		1.74283	1.71564	2753.71		1.74871	1.71522	2118.39
												1.75263	1.72779	2756.05		1.75282	1.72563	2770.59		1.75881	1.72533	2132.78
												1.7625	1.73766	2770.72		1.76277	1.73559	2787.07		1.7688	1.73531	2147.19
												1.77261	1.74777	2785.43		1.7727	1.74551	2803.04		1.77862	1.74513	2161.51
												1.78269	1.75785	2800.17		1.78259	1.7554	2818.28		1.78851	1.75502	2175.79
												1.79257	1.76772	2814.9		1.79243	1.76524	2832.55		1.79861	1.76512	2190.15
												1.80245	1.7776	2829.71		1.80237	1.77518	2845.61		1.80867	1.77518	2204.55
												1.81251	1.78767	2844.52		1.81248	1.78529	2856.93		1.81856	1.78507	2219.01
												1.82262	1.79778	2859.2		1.8226	1.79541	2863.54		1.82846	1.79497	2233.57
												1.83259	1.80775	2873.78		1.84264	1.81545	2861.42		1.83853	1.80504	2248.2
												1.84271	1.81786	2888.35		1.85283	1.82565	2855.72		1.84862	1.81513	2262.8
												1.85272	1.82787	2902.96		1.86293	1.83574	2848.26		1.85861	1.82512	2277.43
												1.86256	1.83771	2917.58		1.87293	1.84574	2839.61		1.86868	1.83519	2292.14
												1.87253	1.84769	2932.26		1.88283	1.85564	2830.03		1.87864	1.84515	2306.96
												1.8827	1.85786	2946.83		1.89267	1.86548	2820.01		1.88854	1.85505	2321.91
												1.89266	1.86781	2960.9		1.90255	1.87536	2810.19		1.8986	1.86511	2336.98
												1.90254	1.87769	2973.28		1.91259	1.8854	2801.25		1.90875	1.87526	2352.05
												1.91277	1.88792	2983.26		1.9226	1.89541	2796.23		1.91867	1.88518	2367.05
												1.92291	1.89806	2990.8		1.9427	1.91551	2799.73		1.92859	1.8951	2382.03
												1.93219	1.90734	2995.93		1.95293	1.92574	2805.43		1.93885	1.90536	2397.12
												1.93791	1.91306	2998.68		1.96288	1.93569	2812.64		1.9489	1.91541	2412.33
												1.93999	1.91515	2999.1		1.97277	1.94558	2820.98		1.95864	1.92515	2427.66
												1.94095	1.91611	2997.17		1.98271	1.95552	2830.28		1.96844	1.93495	2443.08
												1.94174	1.9169	2992.88		1.99253	1.96534	2840.26		1.97848	1.94499	2458.52
												1.94231	1.91746	2986.39		2.00243	1.97524	2850.69		1.98848	1.95499	2473.9
												1.94265	1.9178	2978.12		2.01256	1.98537	2861.47		1.99858	1.96509	2489.2
												1.94283	1.91799	2969.29		2.02261	1.99542	2872.51		2.00876	1.97527	2504.54
												1.94294	1.9181	2960.75		2.03256	2.00537	2883.75		2.01881	1.98532	2519.97
												1.94301	1.91817	2952.61		2.04268	2.01549	2895.26		2.02878	1.99529	2535.47
												1.94306	1.91821	2944.78		2.05278	2.02559	2906.97		2.03873	2.00524	2551.04
												1.94308	1.91823	2937.25		2.06267	2.03549	2918.63		2.04866	2.01517	2566.62
																2.0725	2.04531	2930.2		2.0585	2.02501	2582.12
																2.08257	2.05538	2941.81		2.06834	2.03485	2597.57
																2.09278	2.06559	2953.52		2.07834	2.04485	2613.11
																2.10282	2.07563	2965.28		2.08849	2.055	2628.77
																2.11268	2.0855	2977.18		2.09855	2.06506	2644.51
																2.12264	2.09545	2989.23		2.1085	2.07501	2660.27
																2.13274	2.10555	3001.29		2.11864	2.08516	2676
																2.14271	2.11552	3013.27		2.12888	2.09539	2691.68
																2.15268	2.12549	3025.31		2.13892	2.10543	2707.33
																2.16273	2.13554	3037.45		2.14883	2.11534	2722.95
																2.17263	2.14544	3049.66		2.15867	2.12518	2738.58
																2.18246	2.15527	3061.95		2.16852	2.13503	2754.27
																2.19257	2.16539	3074.27		2.17844	2.14495	2769.99
																2.20272	2.17554	3086.49		2.18851	2.15502	2785.61
																2.2126	2.18541	3098.52		2.1985	2.16501	2801.13
																2.22259	2.1954	3110.51		2.20852	2.17503	2816.61
																2.23285	2.20566	3122.54		2.21877	2.18528	2832.08
																2.24279	2.2156	3134.64		2.22887	2.19538	2847.52
																2.25252	2.22533	3146.7		2.23878	2.20529	2862.96
																2.26244	2.23525	3158.74		2.2487	2.21521	2878.41
																2.27247	2.24528	3170.75		2.25863	2.22514	2893.78
																2.28249	2.2553	3182.63		2.26844	2.23495	2909.04
																2.29258	2.26539	3194.38		2.27843	2.24494	2924.2
																2.30273	2.27554	3206.13		2.28856	2.25507	2939.29
																2.31277	2.28558	3217.89		2.29853	2.26504	2954.32
																2.32284	2.29565	3229.58		2.30853	2.27504	2969.35
																2.33283	2.30564	3241.17		2.31869	2.2852	2984.44
																2.34279	2.3156	3252.55		2.32874	2.29525	2999.52
																2.35268	2.32549	3263.7		2.33856	2.30507	3014.4
																2.36259	2.3354	3274.7		2.34848	2.31499	3029.13
																2.37263	2.34544	3285.61		2.35863	2.32514	3043.83
																2.3827	2.35551	3296.44		2.36877	2.33528	3058.46
																2.39262	2.36543	3307.18		2.37872	2.34523	3072.99
																2.40256	2.37537	3317.75		2.38861	2.35512	3087.49
																2.41269	2.3855	3328.13		2.39868	2.36519	3101.93
																2.42279	2.3956	3338.35		2.40877	2.37528	3116.15
																2.43272	2.40553	3348.47		2.41866	2.38517	3130.2
																2.44262	2.41543	3358.49		2.42867	2.39518	3144.22
																2.45249	2.4253	3368.47		2.43867	2.40518	3158.19
																2.46243	2.43524	3378.43		2.44848	2.41499	3172.1
																2.47249	2.44531	3388.32		2.45836	2.42487	3186
																2.48257	2.45539	3398.04		2.46856	2.43508	3199.78
																2.49255	2.46537	3407.56		2.47865	2.44516	3213.34
																2.50265	2.47546	3417.01		2.4885	2.45502	3226.65
																2.51289	2.4857	3426.38		2.49868	2.46519	3239.87
																2.52291	2.49572	3435.7		2.50889	2.4754	3253.08
																2.5328	2.50562	3445.02		2.51872	2.48523	3266.25
																2.5427	2.51551	3454.3		2.52846	2.49497	3279.3
																2.55261	2.52542	3463.46		2.53841	2.50493	3292.25
																2.56251	2.53533	3472.47		2.5484	2.51491	3305.07
																2.57261	2.54542	3481.36		2.55842	2.52493	3317.68
																2.58274	2.55555	3490.17		2.5686	2.53511	3330.13
																2.59271	2.56552	3498.91		2.57874	2.54525	3342.53
																2.60278	2.57559	3507.7		2.5888	2.55531	3354.89
																2.61286	2.58567	3516.55		2.59887	2.56538	3367.17
																2.6228	2.59561	3525.3		2.60884	2.57535	3379.32
																2.63259	2.6054	3533.82		2.6187	2.58521	3391.26
																2.64253	2.61534	3542.26		2.62853	2.59504	3403
																2.65267	2.62549	3550.74		2.6385	2.60502	3414.58
																2.6627	2.63551	3559.19		2.6486	2.61512	3426.08
																2.67257	2.64539	3567.62		2.65867	2.62519	3437.48
																2.68252	2.65533	3576.09		2.6686	2.63512	3448.78
																2.69264	2.66545	3584.53		2.67862	2.64513	3459.9
																2.70271	2.67552	3592.84		2.68879	2.6553	3470.85
																2.71267	2.68548	3601.11		2.69884	2.66535	3481.66
																2.72271	2.69553	3609.41		2.70876	2.67527	3492.38
																2.73266	2.70547	3617.76		2.71856	2.68507	3502.98
																2.74254	2.71535	3626.15		2.7284	2.69491	3513.52
																2.75262	2.72543	3634.55		2.73837	2.70488	3524.03
																2.76278	2.73559	3642.85		2.74851	2.71502	3534.39
																2.77269	2.7455	3650.95		2.75855	2.72506	3544.53
																2.78264	2.75545	3658.98		2.76853	2.73504	3554.5
																2.79294	2.76575	3667.04		2.77873	2.74524	3564.4
																2.80295	2.77577	3675.17		2.78894	2.75545	3574.18
																2.81265	2.78547	3683.31		2.79887	2.76538	3583.82
																2.82247	2.79528	3691.42		2.80873	2.77525	3593.38
																2.83251	2.80532	3699.45		2.81867	2.78518	3602.78
																2.84252	2.81533	3707.31		2.82852	2.79503	3611.98
																2.85264	2.82546	3715.01		2.83847	2.80498	3621
																2.86282	2.83563	3722.69		2.84861	2.81512	3629.9
																2.87284	2.84565	3730.39		2.85865	2.82516	3638.66
																2.88282	2.85563	3738.07		2.86859	2.8351	3647.32
																2.89275	2.86556	3745.73		2.87876	2.84527	3655.97
																2.90269	2.87551	3753.31		2.88889	2.8554	3664.57
																2.91255	2.88536	3760.69		2.89875	2.86526	3672.99
																2.92238	2.89519	3767.93		2.90853	2.87504	3681.23
																2.93239	2.9052	3775.2		2.91857	2.88508	3689.45
																2.94254	2.91535	3782.5		2.92867	2.89518	3697.65
																2.95261	2.92543	3789.79		2.93857	2.90508	3705.77
																2.96256	2.93537	3796.97		2.94844	2.91495	3713.85
																2.9727	2.94551	3804.03		2.9585	2.92501	3721.91
																2.98294	2.95575	3810.95		2.96863	2.93514	3729.84
																2.99296	2.96577	3817.74		2.97863	2.94514	3737.58
																3.00286	2.97567	3824.41		2.98868	2.95519	3745.27
																3.01268	2.98549	3831.06		2.99873	2.96525	3752.92
																3.02253	2.99534	3837.74		3.00862	2.97513	3760.51
																3.03248	3.0053	3844.39		3.01853	2.98505	3768.06
																3.04256	3.01537	3850.89		3.02872	2.99523	3775.53
																3.05253	3.02534	3857.29		3.03878	3.00529	3782.79
																3.0626	3.03541	3863.7		3.04859	3.01511	3789.84
																3.07287	3.04569	3870.14		3.05868	3.02519	3796.83
																3.08292	3.05573	3876.61		3.06893	3.03544	3803.84
																3.09281	3.06562	3883.15		3.0788	3.04531	3810.87
																3.10275	3.07556	3889.71		3.08853	3.05504	3817.87
																3.11264	3.08545	3896.21		3.09846	3.06497	3824.82
																3.12245	3.09526	3902.6		3.10851	3.07502	3831.64
																3.13251	3.10532	3908.93		3.11853	3.08504	3838.22
																3.14263	3.11544	3915.23		3.12865	3.09516	3844.63
																3.15255	3.12537	3921.48		3.13882	3.10533	3850.97
																3.16259	3.1354	3927.72		3.14888	3.11539	3857.26
																3.17275	3.14556	3934.04		3.15883	3.12534	3863.45
																3.18277	3.15558	3940.3		3.16871	3.13522	3869.53
																3.19257	3.16539	3946.33		3.17863	3.14514	3875.43
																3.20252	3.17533	3952.22		3.18847	3.15498	3881.08
																3.21268	3.1855	3958.1		3.19837	3.16488	3886.48
																3.22281	3.19562	3963.92		3.20842	3.17494	3891.75
																3.23272	3.20553	3969.71		3.21855	3.18506	3896.89
																3.24266	3.21547	3975.53		3.22857	3.19508	3901.82
																3.25274	3.22556	3981.25		3.2386	3.20511	3906.5
																3.26278	3.23559	3985.91		3.24883	3.21534	3910.97
																3.27267	3.24548	3988.35		3.259	3.22551	3915.24
																3.2827	3.25551	3988.48		3.26898	3.23549	3919.35
																3.29261	3.26542	3986.52		3.27879	3.2453	3923.33
																3.30019	3.27301	3982.54		3.28859	3.2551	3927.3
																3.30342	3.27624	3976.56		3.29846	3.26498	3931.35
																3.30461	3.27742	3968.66		3.30852	3.27503	3935.4
																3.30548	3.27829	3958.88		3.31858	3.28509	3939.41
																3.30616	3.27898	3947.26		3.32858	3.29509	3943.46
																3.30658	3.27939	3934.03		3.33872	3.30523	3947.61
																3.30681	3.27962	3920.16		3.3489	3.31541	3951.75
																3.30694	3.27976	3906.8		3.35883	3.32534	3955.94
																3.30703	3.27984	3894.21		3.36875	3.33526	3960.19
																3.30707	3.27989	3882.28		3.3787	3.34521	3964.43
																3.30711	3.27992	3870.93		3.38851	3.35502	3968.54
																3.30712	3.27993	3860.15		3.39838	3.36489	3972.52
																3.30712	3.27993	3849.9		3.40852	3.37503	3976.45
																3.30712	3.27993	3840.15		3.41862	3.38513	3980.32
																				3.42853	3.39504	3984.14
																				3.43861	3.40512	3988.04
																				3.44873	3.41524	3992.01
																				3.45866	3.42517	3995.89
																				3.46852	3.43504	3999.55
																				3.47857	3.44508	4003.16
																				3.48873	3.45525	4006.8
																				3.49877	3.46528	4010.41
																				3.50865	3.47516	4014
																				3.5186	3.48511	4017.56
																				3.52869	3.4952	4020.95
																				3.5387	3.50521	4024.1
																				3.54866	3.51517	4027.11
																				3.55874	3.52525	4030.01
																				3.56865	3.53516	4032.76
																				3.57845	3.54496	4035.34
																				3.58853	3.55504	4037.65
																				3.59871	3.56522	4039.49
																				3.60861	3.57512	4040.67
																				3.62887	3.59538	4040.4
																				3.63885	3.60536	4022.3
																				3.64855	3.61506	3897.55
																				3.65841	3.62492	3720.8
																				3.66842	3.63493	3543.31

## Sheet: BH 8
BH 8 (1000 N)				BH 8 (1500 N)				BH 8 (2000 N)				BH 8 (3000 N)				BH 8 (4000 N)
Standard travel	Displacement corrected	Standard force		Standard travel	Displacement corrected	Standard force		Standard travel	Displacement corrected	Standard force		Standard travel	Displacement corrected	Standard force		Standard travel	Displacement corrected	Standard force
mm	mm	N		mm	mm	N		mm	mm	N		mm	mm	N		mm	mm	N
0	-0.0615835	105.026		0	-0.0225801	138.654		0	-0.0235956	137.225		0	-0.0285338	135.043		0	-0.0718607	110.022
-4.77433e-06	-0.0615882	103.95		-3.56197e-06	-0.0225836	137.606		-4.32372e-06	-0.0236	135.931		-8.8191e-06	-0.0285427	133.75		-5.36442e-07	-0.0718613	108.995
-4.43101e-06	-0.0615879	102.929		-1.33896e-05	-0.0225934	136.34		-1.65439e-05	-0.0236122	134.755		-1.36042e-05	-0.0285474	132.602		-1.81317e-06	-0.0718625	107.906
-4.2057e-06	-0.0615877	101.782		-2.04813e-05	-0.0226005	135.169		-1.79172e-05	-0.0236136	133.69		-1.55354e-05	-0.0285494	131.548		-3.13282e-06	-0.0718639	106.788
-3.67999e-06	-0.0615871	100.715		-1.97518e-05	-0.0225998	134.094		-1.54817e-05	-0.0236111	132.465		-2.02024e-05	-0.028554	130.358		-6.65188e-07	-0.0718614	105.769
-1.31965e-06	-0.0615848	99.7103		-2.71976e-05	-0.0226073	132.867		-1.79493e-05	-0.0236136	131.355		-2.18654e-05	-0.0285557	129.28		3.32594e-05	-0.0718275	104.741
4.31836e-05	-0.0615403	98.6322		-2.98476e-05	-0.0226099	131.736		-2.25413e-05	-0.0236182	130.323		-2.80559e-05	-0.0285619	128.094		0.00300336	-0.0688574	105.785
0.00315757	-0.0584259	99.8139		-2.65861e-05	-0.0226066	130.671		5.42343e-05	-0.0235414	129.296		7.91788e-06	-0.0285259	127.05		0.00487614	-0.0669846	106.957
0.00504609	-0.0565374	101.208		0.00340832	-0.0191717	131.618		0.00294168	-0.020654	130.543		0.00311989	-0.025414	128.305		0.00707723	-0.0647835	108.548
0.00728826	-0.0542952	103.144		0.00528088	-0.0172992	133.149		0.00468512	-0.0189105	131.951		0.00490723	-0.0236266	129.702		0.00964359	-0.0622171	110.47
0.00853887	-0.0530446	104.284		0.00754321	-0.0150369	135.199		0.00685277	-0.0167429	133.901		0.00707609	-0.0214578	131.588		0.0110754	-0.0607853	111.509
0.00989583	-0.0516876	105.512		0.00881757	-0.0137625	136.386		0.00807828	-0.0155174	135.05		0.00831536	-0.0202185	132.685		0.0126135	-0.0592472	112.603
0.0113593	-0.0502242	106.824		0.0101913	-0.0123887	137.672		0.00941592	-0.0141797	136.299		0.00964068	-0.0188932	133.873		0.0142452	-0.0576155	113.749
0.0129237	-0.0486598	108.219		0.0116636	-0.0109165	139.051		0.0108615	-0.0127341	137.645		0.0110577	-0.0174762	135.155		0.0159803	-0.0558804	114.95
0.0145769	-0.0470066	109.697		0.0132493	-0.00933074	140.513		0.0124031	-0.0111925	139.069		0.0125811	-0.0159527	136.52		0.017827	-0.0540337	116.201
0.0163578	-0.0452257	111.258		0.0149177	-0.00766231	142.064		0.0140295	-0.00956611	140.569		0.0142321	-0.0143017	137.972		0.0197862	-0.0520745	117.5
0.0182355	-0.0433479	112.901		0.0166822	-0.00589783	143.7		0.0157473	-0.00784835	142.152		0.0159885	-0.0125454	139.502		0.0218478	-0.0500129	118.849
0.0202346	-0.0413489	114.62		0.0185506	-0.00402949	145.428		0.0175657	-0.00602989	143.811		0.0178454	-0.0106885	141.102		0.0240031	-0.0478576	120.249
0.0223374	-0.0392461	116.401		0.0205216	-0.00205849	147.249		0.0194797	-0.00411596	145.543		0.0197951	-0.0087387	142.78		0.0262542	-0.0456065	121.696
0.0245398	-0.0370437	118.261		0.0225801	0	149.157		0.0214851	-0.00211051	147.35		0.0218515	-0.00668236	144.533		0.0285896	-0.0432711	123.192
0.0268206	-0.0347629	120.189		0.0247469	0.00216687	151.155		0.0235956	0	149.242		0.0239941	-0.00453977	146.36		0.0310268	-0.0408339	124.747
0.0291753	-0.0324082	122.193		0.0270399	0.0044598	153.231		0.0258122	0.00221653	151.207		0.0262273	-0.00230652	148.272		0.0335425	-0.0383183	126.344
0.0316022	-0.0299813	124.281		0.0294475	0.00686743	155.388		0.0281433	0.00454766	153.241		0.0285338	0	150.263		0.0361742	-0.0356865	127.992
0.0341246	-0.0274588	126.438		0.0319835	0.00940342	157.617		0.0305912	0.00699556	155.353		0.0309598	0.00242592	152.328		0.0389286	-0.0329322	129.687
0.0367781	-0.0248054	128.668		0.0345853	0.0120053	159.928		0.0331319	0.00953623	157.546		0.0335241	0.0049903	154.465		0.0418042	-0.0300565	131.43
0.0395375	-0.022046	130.961		0.0372853	0.0147053	162.316		0.0357308	0.0121351	159.819		0.0362251	0.00769123	156.662		0.0447794	-0.0270813	133.224
0.0424226	-0.0191608	133.323		0.0400534	0.0174734	164.792		0.0384003	0.0148046	162.171		0.03901	0.0104762	158.938		0.0478423	-0.0240184	135.07
0.0453689	-0.0162146	135.755		0.0429074	0.0203274	167.347		0.0411784	0.0175827	164.611		0.041877	0.0133432	161.305		0.0509606	-0.0209002	136.96
0.0484024	-0.0131811	138.271		0.045855	0.0232749	169.981		0.0440686	0.0204729	167.134		0.0448218	0.0162879	163.758		0.0541767	-0.017684	138.894
0.0515234	-0.0100601	140.858		0.0489358	0.0263557	172.696		0.0470733	0.0234777	169.733		0.0478153	0.0192814	166.301		0.0575159	-0.0143448	140.875
0.0547407	-0.00684278	143.522		0.0521517	0.0295716	175.488		0.0501987	0.026603	172.407		0.0508997	0.0223658	168.917		0.0609582	-0.0109025	142.887
0.0580969	-0.00348656	146.249		0.05546	0.03288	178.372		0.0534325	0.0298369	175.17		0.0541135	0.0255796	171.603		0.0645099	-0.00735087	144.941
0.0615835	0	149.035		0.0588437	0.0362637	181.349		0.056734	0.0331384	178.032		0.057463	0.0289292	174.362		0.068144	-0.00371672	147.037
0.0651768	0.00359331	151.902		0.0623389	0.0397588	184.412		0.0601248	0.0365291	180.987		0.0609115	0.0323777	177.202		0.0718607	0	149.18
0.0688353	0.00725184	154.853		0.0659466	0.0433665	187.552		0.0636192	0.0400235	184.033		0.0644226	0.0358888	180.123		0.0756829	0.00382219	151.36
0.0725713	0.0109879	157.875		0.0696803	0.0471002	190.78		0.0672481	0.0436524	187.17		0.068006	0.0394721	183.13		0.0796679	0.00780716	153.583
0.0764022	0.0148188	160.961		0.0735348	0.0509547	194.097		0.0710142	0.0474186	190.4		0.071699	0.0431651	186.21		0.0837622	0.0119015	155.858
0.0803926	0.0188092	164.116		0.0774188	0.0548387	197.507		0.0748346	0.0512389	193.723		0.0755612	0.0470273	189.363		0.0879143	0.0160536	158.18
0.0845424	0.022959	167.354		0.0813349	0.0587548	201.004		0.0787226	0.055127	197.127		0.0795378	0.0510039	192.598		0.0920823	0.0202216	160.554
0.0887337	0.0271503	170.675		0.0853452	0.0627652	204.568		0.0826873	0.0590917	200.622		0.0835613	0.0550275	195.912		0.0963545	0.0244938	162.984
0.0929156	0.0313322	174.087		0.0894983	0.0669182	208.206		0.0868066	0.063211	204.209		0.0876513	0.0591175	199.298		0.100781	0.0289204	165.489
0.0972039	0.0356204	177.604		0.093789	0.0712089	211.931		0.0910886	0.0674929	207.898		0.0918868	0.0633529	202.755		0.105301	0.0334405	168.067
0.101663	0.0400795	181.234		0.0981346	0.0755546	215.745		0.0954252	0.0718295	211.666		0.0962853	0.0677515	206.284		0.109857	0.0379965	170.709
0.106223	0.0446393	184.939		0.102516	0.0799364	219.65		0.0998044	0.0762087	215.507		0.100798	0.0722645	209.896		0.114522	0.0426615	173.418
0.11085	0.049267	188.696		0.107003	0.0844234	223.671		0.10435	0.0807542	219.43		0.105334	0.0767999	213.604		0.119347	0.0474868	176.214
0.115651	0.0540675	192.52		0.111664	0.0890843	227.809		0.109065	0.085469	223.443		0.109905	0.0813715	217.422		0.124306	0.052445	179.086
0.120638	0.0590544	196.444		0.116439	0.0938589	232.042		0.113814	0.0902188	227.534		0.11461	0.0860758	221.366		0.129325	0.0574645	182.018
0.125665	0.064081	200.452		0.121297	0.0987165	236.365		0.118574	0.094978	231.703		0.119469	0.0909349	225.402		0.134449	0.0625887	185.007
0.130619	0.0690355	204.543		0.12629	0.10371	240.784		0.12346	0.0998645	235.99		0.124395	0.0958608	229.493		0.139759	0.0678985	188.078
0.135658	0.0740741	208.715		0.131452	0.108872	245.326		0.12851	0.104915	240.397		0.129452	0.100918	233.661		0.1452	0.0733397	191.223
0.140894	0.0793102	212.954		0.136679	0.114099	250.013		0.133618	0.110022	244.912		0.134725	0.106191	237.932		0.150633	0.0787723	194.439
0.146223	0.0846396	217.24		0.14192	0.11934	254.838		0.138759	0.115163	249.513		0.14004	0.111506	242.301		0.156141	0.0842805	197.727
0.151648	0.0900645	221.597		0.147243	0.124663	259.799		0.144056	0.12046	254.232		0.145278	0.116744	246.769		0.161801	0.08994	201.074
0.157236	0.095653	226.067		0.152717	0.130137	264.874		0.149524	0.125928	259.065		0.150636	0.122102	251.344		0.167584	0.0957232	204.48
0.162897	0.101313	230.654		0.158306	0.135726	270.04		0.155048	0.131452	263.985		0.156188	0.127655	256.007		0.173504	0.101643	207.951
0.168587	0.107004	235.347		0.164096	0.141516	275.299		0.160676	0.137081	269.01		0.161769	0.133235	260.748		0.179569	0.107708	211.474
0.17445	0.112867	240.128		0.170066	0.147485	280.668		0.166477	0.142881	274.154		0.167402	0.138868	265.59		0.185639	0.113778	215.055
0.180532	0.118948	244.999		0.175973	0.153392	286.15		0.172334	0.148739	279.428		0.173261	0.144727	270.575		0.191682	0.119821	218.712
0.186681	0.125097	249.956		0.181874	0.159293	291.756		0.178167	0.154571	284.811		0.179205	0.150671	275.702		0.19788	0.12602	222.43
0.192838	0.131255	255		0.187927	0.165347	297.474		0.184111	0.160515	290.295		0.185214	0.15668	280.934		0.204186	0.132326	226.209
0.199103	0.137519	260.134		0.194056	0.171476	303.288		0.190232	0.166636	295.889		0.191396	0.162862	286.263		0.210503	0.138643	230.063
0.205421	0.143837	265.364		0.200243	0.177663	309.219		0.196475	0.172879	301.618		0.197769	0.169236	291.719		0.216977	0.145116	233.983
0.211901	0.150317	270.674		0.206608	0.184028	315.275		0.202891	0.179296	307.467		0.204184	0.175651	297.305		0.223579	0.151718	237.971
0.218524	0.156941	276.049		0.213066	0.190486	321.474		0.209371	0.185776	313.428		0.210568	0.182035	302.998		0.230268	0.158407	242.037
0.22511	0.163527	281.522		0.219552	0.196972	327.817		0.215817	0.192221	319.531		0.217038	0.188504	308.802		0.237163	0.165302	246.196
0.231778	0.170195	287.118		0.226239	0.203659	334.301		0.222379	0.198783	325.765		0.223673	0.19514	314.719		0.244194	0.172333	250.472
0.238585	0.177002	292.836		0.233043	0.210463	340.948		0.229089	0.205493	332.136		0.230535	0.202001	320.72		0.251212	0.179351	254.846
0.245447	0.183864	298.688		0.239912	0.217332	347.749		0.235823	0.212228	338.657		0.237437	0.208903	326.807		0.258279	0.186418	259.295
0.252423	0.19084	304.65		0.2469	0.22432	354.684		0.242681	0.219086	345.3		0.244319	0.215785	333.029		0.265518	0.193658	263.825
0.259556	0.197973	310.718		0.253961	0.231381	361.755		0.24966	0.226065	352.061		0.251292	0.222759	339.403		0.273038	0.201177	268.438
0.266827	0.205244	316.927		0.261209	0.238629	368.98		0.256773	0.233177	358.974		0.258315	0.229781	345.914		0.280604	0.208743	273.113
0.274299	0.212715	323.297		0.268571	0.245991	376.344		0.264115	0.24052	366.049		0.265448	0.236914	352.538		0.288092	0.216231	277.857
0.28182	0.220236	329.803		0.275934	0.253354	383.854		0.271486	0.24789	373.278		0.272817	0.244283	359.274		0.295689	0.223828	282.718
0.289361	0.227778	336.428		0.283366	0.260786	391.519		0.278834	0.255239	380.635		0.28031	0.251776	366.153		0.303349	0.231488	287.713
0.297049	0.235465	343.173		0.290911	0.268331	399.357		0.286306	0.26271	388.118		0.287877	0.259344	373.188		0.311141	0.23928	292.781
0.304961	0.243378	350.029		0.298559	0.275979	407.32		0.293993	0.270398	395.738		0.295513	0.266979	380.377		0.318964	0.247103	297.9
0.313011	0.251428	356.973		0.306362	0.283782	415.392		0.301912	0.278317	403.496		0.303225	0.274691	387.708		0.326905	0.255045	303.111
0.320965	0.259381	364.004		0.314289	0.291709	423.611		0.309692	0.286096	411.364		0.31108	0.282546	395.183		0.335146	0.263285	308.456
0.328927	0.267343	371.17		0.322364	0.299784	432.024		0.317478	0.293882	419.383		0.319124	0.29059	402.78		0.343458	0.271597	313.911
0.337034	0.27545	378.496		0.330429	0.307849	440.625		0.325405	0.301809	427.618		0.327268	0.298734	410.49		0.351726	0.279866	319.498
0.34517	0.283587	385.942		0.338476	0.315896	449.392		0.333485	0.309889	436.02		0.335349	0.306815	418.328		0.360096	0.288236	325.253
0.353395	0.291812	393.505		0.346708	0.324128	458.326		0.341671	0.318075	444.509		0.343482	0.314948	426.334		0.368763	0.296902	331.206
0.361742	0.300159	401.23		0.355213	0.332633	467.395		0.349939	0.326344	453.099		0.35178	0.323246	434.525		0.377524	0.305663	337.339
0.37039	0.308807	409.162		0.363782	0.341202	476.581		0.358481	0.334885	461.877		0.360097	0.331563	442.848		0.386242	0.314381	343.62
0.379109	0.317525	417.227		0.372276	0.349696	485.896		0.367158	0.343562	470.836		0.368526	0.339992	451.305		0.394961	0.3231	350.053
0.387812	0.326229	425.427		0.380936	0.358356	495.421		0.37578	0.352184	479.95		0.377125	0.348592	459.944		0.403837	0.331976	356.66
0.396697	0.335114	433.794		0.389684	0.367104	505.141		0.384393	0.360797	489.199		0.386017	0.357484	468.799		0.412951	0.341091	363.455
0.405894	0.344311	442.32		0.398476	0.375896	515.019		0.393301	0.369705	498.631		0.39493	0.366397	477.803		0.422184	0.350323	370.416
0.415068	0.353485	450.984		0.407336	0.384756	525.073		0.402302	0.378706	508.255		0.403801	0.375267	486.913		0.431452	0.359592	377.557
0.424148	0.362564	459.819		0.416501	0.393921	535.327		0.411299	0.387703	518.006		0.412866	0.384332	496.169		0.440698	0.368837	384.878
0.43333	0.371746	468.862		0.425767	0.403187	545.712		0.420256	0.396661	527.867		0.42231	0.393776	505.597		0.450101	0.37824	392.349
0.442613	0.38103	478.068		0.434979	0.412399	556.193		0.429314	0.405718	537.911		0.431699	0.403165	515.158		0.45974	0.387879	399.906
0.451917	0.390334	487.389		0.444342	0.421761	566.83		0.438658	0.415062	548.17		0.440897	0.412363	524.863		0.469433	0.397572	407.521
0.461401	0.399818	496.841		0.454051	0.431471	577.661		0.448187	0.424591	558.615		0.450123	0.42159	534.774		0.4791	0.40724	415.257
0.471143	0.409559	506.455		0.463675	0.441095	588.678		0.45772	0.434124	569.23		0.459622	0.431088	544.86		0.488956	0.417095	423.119
0.480933	0.419349	516.211		0.473168	0.450588	599.872		0.46727	0.443674	580.031		0.469161	0.440627	555.05		0.498826	0.426965	431.073
0.490703	0.429119	526.098		0.482803	0.460223	611.232		0.477064	0.453468	590.989		0.478825	0.450291	565.3		0.508611	0.43675	439.123
0.500736	0.439153	536.159		0.492655	0.470075	622.699		0.487042	0.463446	602.031		0.488694	0.46016	575.599		0.518587	0.446726	447.297
0.510823	0.44924	546.382		0.502558	0.479978	634.21		0.49695	0.473354	613.124		0.498715	0.470182	585.921		0.528765	0.456905	455.512
0.520744	0.459161	556.662		0.51263	0.49005	645.776		0.506795	0.4832	624.34		0.508744	0.48021	596.28		0.538702	0.466841	463.735
0.530605	0.469021	566.931		0.522779	0.500199	657.449		0.516692	0.493096	635.686		0.518763	0.490229	606.812		0.548583	0.476722	471.996
0.540592	0.479009	577.245		0.532776	0.510196	669.199		0.526516	0.50292	647.131		0.528639	0.500105	617.522		0.558822	0.486961	480.339
0.550729	0.489145	587.624		0.542733	0.520153	681.02		0.536335	0.51274	658.675		0.538234	0.5097	628.279		0.568873	0.497012	488.773
0.560841	0.499257	598.025		0.552803	0.530223	692.914		0.546416	0.52282	670.302		0.547657	0.519123	639.012		0.578657	0.506796	497.271
0.570754	0.509171	608.487		0.56284	0.54026	704.84		0.556585	0.532989	681.941		0.557663	0.529129	649.788		0.588509	0.516648	505.847
0.580673	0.519089	619.011		0.572675	0.550095	716.738		0.566556	0.54296	693.553		0.568173	0.539639	660.637		0.598543	0.526682	514.492
0.590747	0.529164	629.539		0.582481	0.559901	728.652		0.57664	0.553045	705.197		0.578368	0.549834	671.581		0.608502	0.536641	523.176
0.600777	0.539193	640.022		0.592529	0.569949	740.674		0.586969	0.563374	716.902		0.588238	0.559705	682.678		0.618536	0.546676	531.869
0.610709	0.549126	650.531		0.60266	0.58008	752.808		0.59701	0.573414	728.677		0.598259	0.569725	693.936		0.628702	0.556841	540.637
0.620753	0.559169	661.1		0.612653	0.590073	765		0.606773	0.583177	740.501		0.608437	0.579903	705.294		0.638763	0.566902	549.491
0.630662	0.569079	671.741		0.622574	0.599994	777.27		0.616611	0.593015	752.371		0.618537	0.590003	716.612		0.648776	0.576915	558.419
0.640463	0.578879	682.459		0.632662	0.610082	789.596		0.626571	0.602975	764.266		0.62862	0.600086	727.924		0.658821	0.586961	567.412
0.650511	0.588927	693.255		0.642795	0.620215	801.881		0.636462	0.612866	776.132		0.63866	0.610126	739.265		0.668796	0.596935	576.453
0.660717	0.599133	704.045		0.652713	0.630133	814.114		0.646501	0.622905	787.924		0.648575	0.620042	750.688		0.67866	0.606799	585.488
0.670644	0.609061	714.779		0.662671	0.640091	826.349		0.656624	0.633029	799.64		0.658529	0.629995	762.192		0.688563	0.616702	594.538
0.680598	0.619014	725.524		0.672578	0.649998	838.57		0.666644	0.643048	811.309		0.668726	0.640192	773.711		0.698609	0.626748	603.672
0.690864	0.629281	736.336		0.682326	0.659746	850.783		0.676712	0.653117	823.089		0.678778	0.650244	785.183		0.708702	0.636841	612.878
0.700868	0.639285	747.253		0.69204	0.66946	863.078		0.686663	0.663068	835.049		0.688622	0.660088	796.621		0.718687	0.646827	622.141
0.71061	0.649027	758.235		0.702007	0.679427	875.45		0.696325	0.672729	847.084		0.698695	0.670161	808.12		0.728594	0.656733	631.461
0.720466	0.658883	769.253		0.711916	0.689336	887.809		0.705715	0.682119	859.075		0.708877	0.680344	819.684		0.738691	0.666831	640.803
0.730458	0.668874	780.304		0.721694	0.699114	900.12		0.715549	0.691953	871.081		0.718709	0.690175	831.33		0.748845	0.676984	650.148
0.740468	0.678885	791.357		0.73191	0.70933	912.44		0.726044	0.702448	883.156		0.728484	0.69995	843.03		0.758786	0.686926	659.547
0.750594	0.689011	802.383		0.742462	0.719882	924.826		0.736368	0.712773	895.3		0.738493	0.709959	854.795		0.768708	0.696848	669.007
0.760735	0.699151	813.476		0.752649	0.730069	937.325		0.746307	0.722711	907.592		0.748507	0.719973	866.552		0.778578	0.706717	678.531
0.770763	0.709179	824.663		0.762556	0.739976	949.907		0.756258	0.732662	920.088		0.758518	0.729984	878.276		0.788415	0.716554	688.148
0.780826	0.719243	835.908		0.772484	0.749904	962.542		0.766402	0.742806	932.763		0.768661	0.740127	890.013		0.798392	0.726531	697.843
0.79083	0.729246	847.208		0.782366	0.759786	975.189		0.776514	0.752919	945.456		0.778814	0.750281	901.812		0.808579	0.736719	707.547
0.800777	0.739194	858.508		0.792405	0.769825	987.738		0.786567	0.762971	958.157		0.788814	0.76028	913.656		0.818553	0.746693	717.239
0.810665	0.749082	869.762		0.80257	0.77999	1000.18		0.796674	0.773078	970.93		0.798795	0.770261	925.556		0.828575	0.756714	726.946
0.820538	0.758955	881.027		0.812613	0.790033	1012.57		0.806595	0.782999	983.821		0.808741	0.780207	937.551		0.838879	0.767019	736.705
0.830555	0.768971	892.352		0.822639	0.800059	1024.96		0.816493	0.792898	996.841		0.818625	0.790091	949.605		0.849022	0.777161	746.5
0.840646	0.779063	903.736		0.832767	0.810187	1037.4		0.826625	0.803029	1009.96		0.828403	0.799869	961.694		0.858876	0.787016	756.335
0.85066	0.789076	915.182		0.842854	0.820274	1049.85		0.836786	0.813191	1023.09		0.838309	0.809775	973.897		0.86872	0.796859	766.211
0.860615	0.799031	926.641		0.85275	0.83017	1062.19		0.846689	0.823093	1036.2		0.848406	0.819872	986.282		0.878663	0.806803	776.101
0.870724	0.80914	938.068		0.862564	0.839984	1074.44		0.856639	0.833043	1049.37		0.85853	0.829996	998.807		0.888521	0.81666	785.964
0.88085	0.819267	949.466		0.872582	0.850002	1086.69		0.866845	0.84325	1062.63		0.86854	0.840006	1011.47		0.898526	0.826665	795.802
0.890804	0.82922	960.883		0.882676	0.860096	1098.95		0.876787	0.853192	1075.95		0.878597	0.850063	1024.23		0.908649	0.836789	805.65
0.900709	0.839126	972.062		0.892607	0.870027	1111.2		0.886559	0.862964	1089.32		0.888815	0.860282	1037.06		0.918643	0.846783	815.521
0.91053	0.848947	982.169		0.902444	0.879864	1123.47		0.896454	0.872858	1102.74		0.898922	0.870388	1049.95		0.928666	0.856805	825.425
0.920399	0.858815	990.709		0.912475	0.889895	1135.75		0.906518	0.882922	1116.16		0.908884	0.88035	1062.91		0.938809	0.866948	835.382
0.930413	0.868829	997.663		0.922581	0.900001	1147.98		0.916516	0.89292	1129.55		0.918768	0.890235	1075.92		0.948874	0.877013	845.367
0.939643	0.87806	1003.09		0.932581	0.910001	1160.16		0.926621	0.903026	1142.91		0.928586	0.900052	1088.96		0.958776	0.886916	855.291
0.944737	0.883154	1007		0.942662	0.920081	1172.37		0.936788	0.913192	1156.34		0.93844	0.909906	1102.06		0.968654	0.896794	865.193
0.946375	0.884792	1009.4		0.952713	0.930133	1184.6		0.946824	0.923228	1169.83		0.948513	0.919979	1115.18		0.978676	0.906816	875.147
0.948006	0.886423	1009.87		0.962588	0.940008	1196.86		0.956806	0.933211	1183.38		0.958597	0.930063	1128.28		0.988692	0.916831	885.153
0.948547	0.886963	1007.87		0.972511	0.949931	1209.17		0.966746	0.943151	1196.97		0.968529	0.939995	1141.38		0.998552	0.926691	895.203
0.948853	0.88727	1004.66		0.982725	0.960145	1221.47		0.976657	0.953062	1210.6		0.978612	0.950078	1154.54		1.00842	0.936562	905.323
0.949034	0.887451	1001.11		0.992775	0.970195	1233.7		0.98648	0.962885	1224.17		0.988856	0.960322	1167.75		1.01847	0.946612	915.484
0.949147	0.887563	997.675		1.00262	0.980044	1245.86		0.996346	0.97275	1237.75		0.998835	0.970301	1181.02		1.0286	0.956743	925.65
0.949205	0.887621	994.378		1.01271	0.990133	1258.05		1.00637	0.982777	1251.42		1.00873	0.9802	1194.37		1.03863	0.966774	935.844
0.949247	0.887664	991.163		1.02285	1.00027	1270.3		1.0165	0.992901	1265.18		1.01867	0.990135	1207.77		1.04871	0.976851	946.101
0.949263	0.88768	988.043		1.0327	1.01012	1282.62		1.02655	1.00296	1279		1.02852	0.999985	1221.18		1.0587	0.986838	956.411
0.949274	0.88769	985.032		1.0425	1.01992	1294.98		1.03657	1.01297	1292.84		1.03841	1.00988	1234.6		1.06861	0.996753	966.782
				1.05249	1.02991	1307.37		1.04675	1.02315	1306.66		1.04854	1.02	1248.05		1.07864	1.00678	977.222
				1.06251	1.03993	1319.75		1.05692	1.03333	1320.44		1.0586	1.03006	1261.54		1.08883	1.01697	987.653
				1.07253	1.04995	1332.06		1.06691	1.04331	1334.24		1.06848	1.03994	1275.07		1.09878	1.02692	998.023
				1.08268	1.0601	1344.36		1.07681	1.05322	1348.05		1.07858	1.05005	1288.72		1.10863	1.03677	1008.38
				1.09282	1.07024	1356.71		1.08662	1.06303	1361.86		1.08874	1.06021	1302.48		1.11882	1.04696	1018.8
				1.10282	1.08024	1369.11		1.09645	1.07286	1375.73		1.09868	1.07015	1316.22		1.12892	1.05706	1029.29
				1.11279	1.09021	1381.55		1.10646	1.08286	1389.63		1.10852	1.07999	1329.9		1.13871	1.06685	1039.83
				1.12271	1.10013	1394.04		1.11658	1.09298	1403.48		1.11856	1.09003	1343.61		1.14853	1.07666	1050.45
				1.13259	1.11001	1406.51		1.12653	1.10293	1417.28		1.12871	1.10018	1357.4		1.15854	1.08668	1061.11
				1.1424	1.11982	1418.92		1.13654	1.11294	1431.08		1.13875	1.11022	1371.19		1.16853	1.09667	1071.76
				1.15233	1.12975	1431.35		1.14682	1.12322	1444.89		1.14865	1.12012	1385.04		1.17859	1.10673	1082.39
				1.16241	1.13983	1443.87		1.15688	1.13328	1458.72		1.15861	1.13008	1398.95		1.18878	1.11692	1093.04
				1.17254	1.14996	1456.43		1.16679	1.14319	1472.58		1.16872	1.14018	1412.86		1.19888	1.12702	1103.76
				1.18255	1.15997	1468.81		1.17669	1.15309	1486.46		1.17875	1.15022	1426.7		1.20886	1.137	1114.52
				1.19262	1.17004	1480.05		1.18655	1.16295	1500.3		1.18869	1.16015	1440.58		1.21883	1.14697	1125.33
				1.20284	1.18026	1489.5		1.19639	1.17279	1514.09		1.19872	1.17019	1454.53		1.22875	1.15689	1136.19
				1.21293	1.19035	1497.15		1.20649	1.18289	1527.83		1.20864	1.18011	1468.53		1.2386	1.16673	1147.05
				1.2222	1.19962	1503.07		1.21661	1.19301	1541.54		1.21846	1.18992	1482.59		1.24839	1.17653	1157.87
				1.22757	1.20499	1507.27		1.22651	1.20291	1555.25		1.22853	1.2	1496.7		1.25835	1.18649	1168.76
				1.22919	1.20661	1509.77		1.23651	1.21292	1569		1.2387	1.21017	1510.77		1.26847	1.19661	1179.75
				1.23136	1.20878	1506.97		1.24671	1.22311	1582.81		1.24862	1.22009	1524.76		1.27854	1.20668	1190.79
				1.23167	1.20909	1502.89		1.25673	1.23314	1596.6		1.25858	1.23005	1538.74		1.28852	1.21666	1201.89
				1.23184	1.20926	1498.36		1.26657	1.24297	1610.22		1.26884	1.2403	1552.78		1.29864	1.22678	1213.01
				1.23195	1.20937	1493.99		1.27653	1.25293	1623.76		1.27881	1.25028	1566.9		1.30889	1.23703	1224.14
				1.23201	1.20943	1489.8		1.28668	1.26308	1637.31		1.28857	1.26003	1581.04		1.31896	1.2471	1235.3
				1.23205	1.20947	1485.71		1.29678	1.27319	1650.8		1.29842	1.26988	1595.19		1.32892	1.25706	1246.47
				1.23207	1.20949	1481.74		1.30669	1.2831	1664.23		1.30844	1.27991	1609.33		1.33878	1.26692	1257.66
				1.23208	1.2095	1477.9		1.31662	1.29302	1677.64		1.31845	1.28991	1623.42		1.34857	1.27671	1268.91
				1.23208	1.2095	1474.2		1.3267	1.30311	1690.97		1.32853	1.29999	1637.46		1.35848	1.28662	1280.26
				1.23208	1.2095	1470.61		1.33678	1.31318	1704.13		1.33868	1.31014	1651.5		1.36856	1.2967	1291.63
				1.23208	1.2095	1467.14		1.3467	1.32311	1717.21		1.34872	1.32018	1665.58		1.37852	1.30665	1302.98
				1.23208	1.2095	1463.8		1.35673	1.33313	1730.27		1.35875	1.33022	1679.66		1.38846	1.3166	1314.34
				1.23207	1.20949	1460.56		1.36668	1.34308	1743.3		1.36879	1.34026	1693.7		1.39871	1.32685	1325.75
				1.23206	1.20948	1457.42		1.37649	1.3529	1756.3		1.37873	1.35019	1707.66		1.40894	1.33708	1337.17
								1.38649	1.36289	1769.29		1.3886	1.36007	1721.49		1.41888	1.34702	1348.66
								1.39671	1.37311	1782.19		1.39854	1.37001	1735.22		1.42875	1.35689	1360.21
								1.40668	1.38309	1794.92		1.40858	1.38004	1748.91		1.43868	1.36682	1371.8
								1.41654	1.39295	1807.53		1.41866	1.39012	1762.58		1.44849	1.37663	1383.37
								1.42676	1.40317	1820.14		1.42863	1.4001	1776.2		1.45843	1.38657	1394.93
								1.43688	1.41329	1832.76		1.43855	1.41002	1789.75		1.46857	1.39671	1406.5
								1.44667	1.42307	1845.33		1.44866	1.42012	1803.19		1.47854	1.40668	1418.1
								1.45644	1.43284	1857.86		1.45881	1.43027	1816.5		1.48848	1.41662	1429.77
								1.46645	1.44286	1870.36		1.46875	1.44022	1829.75		1.49864	1.42678	1441.55
								1.47647	1.45287	1882.77		1.47863	1.4501	1842.9		1.50875	1.43689	1453.45
								1.48649	1.46289	1895.06		1.48848	1.45994	1855.98		1.51867	1.44681	1465.31
								1.49662	1.47303	1907.31		1.49836	1.46983	1869.01		1.52855	1.45668	1477.1
								1.50673	1.48313	1919.56		1.5084	1.47987	1881.92		1.53863	1.46677	1488.94
								1.51677	1.49317	1931.83		1.51854	1.49001	1894.6		1.54882	1.47695	1500.81
								1.52681	1.50322	1944.06		1.52853	1.49999	1907.01		1.55884	1.48698	1512.67
								1.53678	1.51319	1956.23		1.5386	1.51007	1919.21		1.56869	1.49683	1524.59
								1.54665	1.52305	1967.94		1.54889	1.52036	1931.16		1.5787	1.50684	1536.57
								1.55655	1.53296	1978.19		1.55892	1.53039	1942.83		1.58879	1.51693	1548.51
								1.56657	1.54297	1986.5		1.56877	1.54024	1954.22		1.59873	1.52687	1560.38
								1.57665	1.55305	1992.89		1.57867	1.55013	1965.26		1.60873	1.53687	1572.28
								1.58573	1.56214	1997.44		1.5886	1.56007	1975.85		1.61874	1.54688	1584.22
								1.59068	1.56708	2000.19		1.59846	1.56993	1985.87		1.62863	1.55677	1596.23
								1.59229	1.56869	2001.12		1.60855	1.58002	1995.26		1.63847	1.56661	1608.33
								1.59387	1.57028	1997.56		1.61868	1.59015	2003.96		1.64862	1.57675	1620.47
								1.5944	1.5708	1993.13		1.62863	1.60009	2011.79		1.65872	1.58686	1632.56
								1.5947	1.5711	1987.35		1.63868	1.61014	2018.53		1.66858	1.59672	1644.58
								1.59487	1.57127	1981.24		1.64883	1.62029	2023.9		1.67866	1.6068	1656.61
								1.59496	1.57136	1975.34		1.65885	1.63032	2027.06		1.68892	1.61706	1668.72
								1.59503	1.57144	1969.68		1.67859	1.65005	2027.48		1.69879	1.62693	1680.92
								1.59506	1.57147	1964.18		1.68866	1.66013	2026.09		1.70853	1.63667	1693.16
								1.59508	1.57148	1958.85		1.69867	1.67013	2023.98		1.71846	1.6466	1705.44
								1.59508	1.57149	1953.71		1.70852	1.67998	2021.43		1.72844	1.65658	1717.72
								1.59509	1.57149	1948.76		1.71845	1.68991	2018.68		1.73846	1.6666	1729.95
								1.59509	1.57149	1943.98		1.72857	1.70003	2015.92		1.74863	1.67677	1742.16
												1.73865	1.71012	2013.4		1.75876	1.6869	1754.44
												1.74863	1.72009	2011.6		1.76877	1.69691	1766.77
												1.75872	1.73019	2011.52		1.77884	1.70698	1779.14
												1.76867	1.74014	2013.23		1.78884	1.71698	1791.53
												1.77858	1.75004	2016.21		1.79877	1.72691	1803.87
												1.78864	1.76011	2020.12		1.80862	1.73676	1816.16
												1.79882	1.77028	2024.77		1.81854	1.74668	1828.46
												1.80871	1.78018	2030		1.82859	1.75673	1840.81
												1.81862	1.79008	2035.84		1.83865	1.76679	1853.2
												1.82886	1.80032	2042.39		1.84862	1.77676	1865.62
												1.83892	1.81038	2049.64		1.85863	1.78676	1878.04
												1.84868	1.82015	2057.51		1.86878	1.79692	1890.43
												1.85849	1.82995	2065.86		1.87884	1.80698	1902.8
												1.86849	1.83996	2074.52		1.88877	1.81691	1915.19
												1.87851	1.84998	2083.34		1.89867	1.82681	1927.57
												1.88861	1.86007	2092.24		1.90852	1.83666	1939.98
												1.8988	1.87027	2101.29		1.9184	1.84653	1952.45
												1.90887	1.88033	2110.5		1.92848	1.85661	1964.93
												1.91884	1.89031	2119.81		1.93853	1.86667	1977.37
												1.92879	1.90025	2129.18		1.94849	1.87663	1989.74
												1.9387	1.91016	2138.55		1.95862	1.88676	2002.11
												1.94853	1.92	2147.8		1.96888	1.89702	2014.48
												1.95835	1.92982	2156.99		1.97891	1.90704	2026.88
												1.96836	1.93983	2166.21		1.98879	1.91693	2039.33
												1.97847	1.94994	2175.5		1.99869	1.92683	2051.8
												1.98852	1.95999	2184.8		2.00855	1.93669	2064.23
												1.99848	1.96995	2194.06		2.01845	1.94659	2076.58
												2.00863	1.9801	2203.25		2.02856	1.9567	2088.89
												2.0189	1.99037	2212.37		2.03868	1.96682	2101.17
												2.02896	2.00042	2221.44		2.04864	1.97678	2113.43
												2.03889	2.01036	2230.5		2.05874	1.98688	2125.76
												2.04871	2.02017	2239.58		2.06889	1.99703	2138.15
												2.05852	2.02998	2248.7		2.07882	2.00696	2150.48
												2.06846	2.03992	2257.86		2.08859	2.01673	2162.67
												2.07851	2.04998	2266.93		2.09856	2.02669	2174.83
												2.08848	2.05995	2275.91		2.10868	2.03682	2187.03
												2.0985	2.06997	2284.87		2.11866	2.0468	2199.21
												2.10878	2.08025	2293.83		2.12851	2.05665	2211.43
												2.11893	2.0904	2302.77		2.13847	2.06661	2223.67
												2.12882	2.10029	2311.72		2.14858	2.07672	2235.86
												2.13872	2.11019	2320.66		2.15864	2.08678	2247.95
												2.14863	2.12009	2329.53		2.16867	2.09681	2260.01
												2.15843	2.12989	2338.27		2.17879	2.10693	2272.07
												2.16844	2.1399	2346.92		2.18869	2.11683	2284.14
												2.1786	2.15007	2355.52		2.19855	2.12669	2296.21
												2.18854	2.16001	2364.07		2.20867	2.13681	2308.26
												2.19848	2.16995	2372.63		2.21881	2.14695	2320.19
												2.20864	2.18011	2381.26		2.2287	2.15684	2331.94
												2.21872	2.19019	2389.87		2.23867	2.16681	2343.63
												2.22858	2.20004	2398.27		2.24891	2.17705	2355.34
												2.2385	2.20997	2406.55		2.25884	2.18697	2367.08
												2.24866	2.22012	2414.8		2.26856	2.1967	2378.79
												2.25882	2.23029	2423		2.27847	2.20661	2390.48
												2.26879	2.24026	2431.12		2.28851	2.21665	2402.12
												2.27866	2.25012	2439.21		2.29852	2.22665	2413.61
												2.28871	2.26017	2447.24		2.30861	2.23675	2424.97
												2.29877	2.27024	2455.1		2.3188	2.24694	2436.29
												2.30869	2.28016	2462.84		2.32888	2.25702	2447.59
												2.31872	2.29019	2470.54		2.33889	2.26703	2458.89
												2.32872	2.30019	2478.24		2.34878	2.27692	2470.17
												2.33856	2.31003	2485.93		2.35863	2.28677	2481.36
												2.34847	2.31994	2493.64		2.36844	2.29658	2492.41
												2.35866	2.33013	2501.32		2.37833	2.30647	2503.37
												2.36868	2.34015	2508.85		2.38841	2.31655	2514.33
												2.37853	2.34999	2516.24		2.39857	2.32671	2525.31
												2.3887	2.36017	2523.63		2.40859	2.33673	2536.29
												2.39892	2.37038	2531.08		2.41858	2.34672	2547.21
												2.40874	2.3802	2538.53		2.42876	2.3569	2558.03
												2.41846	2.38993	2545.95		2.43896	2.3671	2568.75
												2.42843	2.3999	2553.34		2.44894	2.37708	2579.41
												2.43844	2.40991	2560.67		2.45881	2.38695	2589.99
												2.44849	2.41995	2567.9		2.46859	2.39673	2600.53
												2.45866	2.43012	2575.1		2.47845	2.40659	2611.08
												2.46876	2.44023	2582.36		2.4885	2.41664	2621.59
												2.47876	2.45023	2589.67		2.49859	2.42673	2631.98
												2.48881	2.46028	2597.01		2.50852	2.43666	2642.24
												2.4988	2.47027	2604.35		2.51857	2.44671	2652.46
												2.50871	2.48017	2611.62		2.52885	2.45699	2662.63
												2.51858	2.49004	2618.86		2.5389	2.46704	2672.74
												2.52853	2.5	2626.16		2.5488	2.47694	2682.8
												2.53859	2.51006	2633.53		2.55872	2.48686	2692.82
												2.54865	2.52012	2640.92		2.56858	2.49672	2702.75
												2.55859	2.53006	2648.3		2.57843	2.50657	2712.57
												2.56864	2.54011	2655.65		2.5885	2.51663	2722.26
												2.57881	2.55028	2662.94		2.59859	2.52673	2731.86
												2.58884	2.56031	2670.18		2.60855	2.53669	2741.4
												2.59873	2.5702	2677.39		2.61864	2.54678	2750.96
												2.60858	2.58005	2684.58		2.62877	2.55691	2760.54
												2.61848	2.58994	2691.79		2.63872	2.56686	2770.03
												2.62841	2.59987	2699.05		2.64854	2.57668	2779.32
												2.63847	2.60994	2706.24		2.65855	2.58669	2788.49
												2.64849	2.61996	2713.32		2.66875	2.59689	2797.61
												2.65848	2.62995	2720.35		2.67883	2.60697	2806.62
												2.66871	2.64017	2727.37		2.68871	2.61685	2815.56
												2.67892	2.65039	2734.37		2.69863	2.62677	2824.49
												2.68884	2.66031	2741.41		2.70872	2.63686	2833.29
												2.6987	2.67017	2748.5		2.71875	2.64689	2841.87
												2.70865	2.68012	2755.57		2.72869	2.65683	2850.31
												2.71851	2.68997	2762.55		2.73876	2.6669	2858.71
												2.72846	2.69993	2769.44		2.7487	2.67684	2867.05
												2.73859	2.71006	2776.31		2.7585	2.68664	2875.33
												2.74865	2.72011	2783.17		2.76851	2.69665	2883.58
												2.75864	2.7301	2790.03		2.77874	2.70688	2891.68
												2.76877	2.74024	2796.97		2.7887	2.71683	2899.56
												2.77887	2.75034	2803.96		2.79859	2.72672	2907.28
												2.78874	2.76021	2810.86		2.80883	2.73696	2914.96
												2.79855	2.77001	2817.65		2.81889	2.74703	2922.65
												2.80858	2.78004	2824.47		2.82866	2.7568	2930.28
												2.81869	2.79015	2831.36		2.83847	2.76661	2937.84
												2.82863	2.80009	2838.28		2.84845	2.77659	2945.33
												2.83848	2.80994	2845.26		2.85844	2.78658	2952.69
												2.84848	2.81995	2852.28		2.86854	2.79668	2959.9
												2.85859	2.83006	2859.24		2.87874	2.80688	2967.05
												2.86863	2.84009	2866.15		2.88881	2.81695	2974.18
												2.8787	2.85017	2873.1		2.89886	2.827	2981.28
												2.88876	2.86023	2880.1		2.90888	2.83702	2988.34
												2.89862	2.87008	2887.15		2.91884	2.84698	2995.3
												2.90852	2.87998	2894.27		2.92873	2.85687	3002.07
												2.91871	2.89017	2901.4		2.93859	2.86673	3008.72
												2.92879	2.90025	2908.43		2.94858	2.87672	3015.35
												2.93865	2.91012	2915.33		2.95869	2.88683	3021.95
												2.9487	2.92016	2922.29		2.96868	2.89682	3028.53
												2.95893	2.9304	2929.35		2.9786	2.90674	3035.04
												2.96881	2.94027	2936.48		2.98871	2.91685	3041.46
												2.97852	2.94999	2943.65		2.99889	2.92703	3047.76
												2.98846	2.95993	2950.85		3.00882	2.93696	3054
												2.99849	2.96995	2958.01		3.01873	2.94687	3060.19
												3.00851	2.97998	2965.06		3.02861	2.95675	3066.34
												3.01864	2.99011	2972.01		3.03848	2.96662	3072.51
												3.0288	3.00026	2978.86		3.04846	2.9766	3078.66
												3.03885	3.01032	2984.77		3.0586	2.98674	3084.71
												3.04887	3.02033	2988.85		3.06859	2.99673	3090.65
												3.05875	3.03022	2990.98		3.07857	3.00671	3096.52
												3.07509	3.04656	2989.75		3.08881	3.01695	3102.38
												3.07771	3.04917	2986.49		3.09894	3.02708	3108.22
												3.07874	3.05021	2981.62		3.10886	3.037	3114.08
												3.07956	3.05102	2975.2		3.11873	3.04687	3119.97
												3.08017	3.05163	2967.27		3.12863	3.05677	3125.85
												3.08056	3.05202	2958.01		3.13848	3.06662	3131.66
												3.08078	3.05224	2948.3		3.14852	3.07666	3137.4
												3.08091	3.05237	2938.97		3.15871	3.08685	3143.11
												3.08099	3.05245	2930.17		3.1687	3.09684	3148.77
												3.08104	3.05251	2921.79		3.17872	3.10686	3154.45
												3.08106	3.05253	2913.8		3.18888	3.11702	3160.2
												3.08108	3.05255	2906.21		3.19893	3.12707	3165.94
												3.08109	3.05255	2898.96		3.20873	3.13687	3171.53
												3.08109	3.05255	2892.04		3.21857	3.14671	3177.03
												3.08108	3.05255	2885.42		3.22862	3.15676	3182.53
												3.08108	3.05255	2879.08		3.23868	3.16682	3188.04
												3.08107	3.05254	2872.99		3.24859	3.17673	3193.55
												3.08107	3.05254	2867.14		3.25852	3.18665	3199.1
												3.08106	3.05253	2861.49		3.26857	3.19671	3204.66
												3.08106	3.05253	2856.04		3.27864	3.20677	3210.15
												3.08105	3.05252	2850.78		3.28865	3.21679	3215.6
												3.08104	3.05251	2845.68		3.29876	3.2269	3221.1
												3.08105	3.05251	2840.74		3.30875	3.23689	3226.63
												3.08103	3.0525	2835.93		3.31859	3.24673	3232.2
																3.32857	3.25671	3237.83
																3.33877	3.26691	3243.45
																3.34877	3.27691	3248.93
																3.35861	3.28675	3254.34
																3.36878	3.29692	3259.82
																3.37891	3.30705	3265.42
																3.3887	3.31684	3271.08
																3.39846	3.3266	3276.77
																3.40849	3.33663	3282.48
																3.41856	3.3467	3288.16
																3.42863	3.35677	3293.75
																3.43877	3.36691	3299.33
																3.44883	3.37697	3304.98
																3.45883	3.38697	3310.68
																3.46881	3.39695	3316.4
																3.47873	3.40687	3322.12
																3.48862	3.41676	3327.76
																3.49844	3.42658	3333.32
																3.5084	3.43653	3338.89
																3.51851	3.44665	3344.5
																3.52864	3.45678	3350.16
																3.53864	3.46678	3355.81
																3.54874	3.47688	3361.4
																3.55895	3.48709	3366.94
																3.569	3.49714	3372.44
																3.57891	3.50705	3377.92
																3.58871	3.51685	3383.4
																3.59853	3.52666	3388.93
																3.60847	3.53661	3394.53
																3.61855	3.54669	3400.08
																3.62857	3.55671	3405.56
																3.63856	3.56669	3411.02
																3.64878	3.57692	3416.53
																3.65893	3.58707	3422.05
																3.66882	3.59696	3427.59
																3.67871	3.60685	3433.14
																3.68867	3.61681	3438.67
																3.6985	3.62664	3444.13
																3.70847	3.63661	3449.53
																3.71861	3.64675	3454.9
																3.72859	3.65673	3460.25
																3.73856	3.6667	3465.61
																3.7487	3.67684	3471.06
																3.75877	3.68691	3476.54
																3.76864	3.69678	3481.88
																3.77853	3.70667	3487.1
																3.78867	3.71681	3492.31
																3.79886	3.72699	3497.49
																3.80882	3.73696	3502.61
																3.81869	3.74683	3507.76
																3.82871	3.75685	3512.92
																3.83879	3.76693	3517.96
																3.84868	3.77682	3522.84
																3.85868	3.78682	3527.7
																3.86875	3.79689	3532.57
																3.87863	3.80677	3537.43
																3.88849	3.81663	3542.32
																3.89865	3.82679	3547.21
																3.90875	3.83689	3551.96
																3.91859	3.84672	3556.5
																3.92867	3.85681	3560.97
																3.93894	3.86708	3565.48
																3.9488	3.87694	3570.02
																3.9585	3.88664	3574.52
																3.96844	3.89658	3578.98
																3.97845	3.90659	3583.38
																3.9885	3.91664	3587.64
																3.99865	3.92679	3591.82
																4.00879	3.93693	3596.02
																4.01881	3.94695	3600.25
																4.02887	3.95701	3604.47
																4.0389	3.96704	3608.64
																4.0488	3.97694	3612.7
																4.05864	3.98678	3616.64
																4.06856	3.9967	3620.53
																4.07861	4.00675	3624.4
																4.08868	4.01681	3628.24
																4.09864	4.02678	3632.03
																4.10864	4.03678	3635.74
																4.11878	4.04692	3639.36
																4.12882	4.05696	3642.86
																4.13876	4.0669	3646.28
																4.14862	4.07676	3649.57
																4.15849	4.08663	3652.78
																4.16845	4.09659	3655.97
																4.17855	4.10669	3659.09
																4.18861	4.11675	3662.02
																4.19853	4.12667	3664.8
																4.20866	4.1368	3667.52
																4.21895	4.14709	3670.15
																4.22891	4.15705	3672.75
																4.23877	4.16691	3675.35
																4.2487	4.17684	3677.91
																4.25856	4.18669	3680.35
																4.26849	4.19662	3682.64
																4.27866	4.2068	3684.84
																4.28878	4.21692	3686.95
																4.29871	4.22685	3688.99
																4.30879	4.23693	3690.99
																4.31891	4.24705	3692.93
																4.32881	4.25695	3694.65
																4.3386	4.26674	3696.09
																4.3486	4.27674	3697.35
																4.35872	4.28686	3698.47
																4.37858	4.30671	3700.01
																4.39861	4.32675	3700.41
																4.40863	4.33677	3699.89
																4.41865	4.34679	3698.82
																4.42877	4.35691	3697.14
																4.4387	4.36684	3694.59
																4.44856	4.3767	3690.67
																4.45872	4.38686	3659.93
