# Supplementary material for: Biomechanical Performance of BoneHelix® Compared with Elastic Stable Intramedullary Nailing (ESIN) in a Pediatric Tibia Fracture Model
Source: Life (Basel). 2021 Nov 5;11(11):1189. doi: 10.3390/life11111189 (PMC8622329; doi:10.3390/life11111189)
Supplement: Supplementary file 1 [file life-11-01189-s001.zip › Supplementary material Table S2 - Experimental data after load-to-failure tests of ESIN.xlsx]

## Sheet: Results
Specimen (Upper force limit)	Tool separation at start position	WA Weg Ende	WA Start Weg	trav weg start	trav weg ende	t VK	Fmax	FBreak	W to Fmax		F at failure (graph)	Type of failure
	mm	mm	mm	mm	mm	mm	N	N	Nmm
ESIN 1 (1000 N)	43.3137	142.656	143.727	1224.58	1225.65	1224.83	1014.28		545.576
ESIN 1 (1500 N)	43.3137	142.165	143.65	1224.65	1226.14	1224.73	1506.8		1097.54
ESIN 1 (2000 N)	43.3137	141.519	143.526	1224.78	1226.78	1224.9	2003.09		2064.93
ESIN 1 (3000 N)	43.3137	140.268	143.101	1225.2	1228.03	1225.61	2992.52		4284.25
ESIN 1 (4000 N)	43.3137	76.6462	78.8653	1289.44		1290.08	2748.05	2441.82	2597.45		2748.05	embedding
ESIN 2 (1000 N)	43.3137	115.98	116.564	1251.74	1252.32	1214.04	1006.25		339.274
ESIN 2 (1500 N)	43.3137	115.66	116.46	1251.84	1252.64	1251.95	1513.74		640.714
ESIN 2 (2000 N)	43.3137	115.368	116.394	1251.91	1252.93	1251.97	2014.44		1041.3
ESIN 2 (3000 N)	43.3137	114.866	116.31	1251.99	1253.44	1252.07	3012.68		2132.87
ESIN 2 (4000 N)	43.3137	114.35	116.146	1252.16	1253.95	1252.32	4010.92		3461.2
ESIN 2 (5000 N)	43.3137	113.791	115.926	1252.38	1254.51	1252.6	4993.33		5151.13
ESIN 2 (6000 N)	43.3137	113.013	115.626	1252.68	1255.29	1252.98	5975.13		7970.55
ESIN 2 (7000 N)	43.3137	110.924	115.202	1253.1		1253.52	5688.14	5072.53	7298.72		5688.14	bone
ESIN 3 (1000 N)	43.3137	85.7538	86.2528	1282.05	1282.55	1311	1038.24		281.161
ESIN 3 (1500 N)	43.3137	85.4821	86.2327	1282.07	1282.82	1282.09	1530.34		591.085
ESIN 3 (2000 N)	43.3137	85.2088	86.1968	1282.11	1283.09	1282.14	2024.42		1004.73
ESIN 3 (3000 N)	43.3137	84.6598	86.1321	1282.17	1283.64	1282.23	3013.64		2250.55
ESIN 3 (4000 N)	43.3137	83.5227	85.9771	1282.32	1284.78	1282.48	3989.1		5722.52		3655.89	embedding
ESIN 4 (1000 N)	43.3137	78.7595	79.6927	1288.61	1289.54	1294.23	1017.74		482.093
ESIN 4 (1500 N)	43.3137	78.3992	79.6589	1288.64	1289.9	1288.68	1515.85		919.085
ESIN 4 (2000 N)	43.3137	78.022	79.6321	1288.67	1290.28	1288.7	2002.74		1520.75
ESIN 4 (3000 N)	43.3137	76.6231	79.5975	1288.7	1291.68	1288.74	2991.5		4810.51		2696.54	embedding
ESIN 5 (1000 N)	43.3137	82.2467	82.8098	1285.49	1286.06	1279.38	1019.02		327.352
ESIN 5 (1500 N)	43.3137	81.8698	82.7619	1285.54	1286.43	1285.59	1506.75		740.708
ESIN 5 (2000 N)	43.3137	81.4611	82.6612	1285.64	1286.84	1285.74	2003.86		1279.61
ESIN 5 (3000 N)	43.3137	80.6985	82.4946	1285.81	1287.6	1285.97	2995.41		2805.83
ESIN 5 (4000 N)	43.3137	79.7049	82.123	1286.18	1288.6	1286.55	4002.22		5163.65
ESIN 5 (5000 N)	43.3137	78.6767	81.5188	1286.78	1289.63	1287.39	4982.67		7300.31
ESIN 5 (6000 N)	43.3137	76.6953	80.8295	1287.47		1288.16	5202.21	4681.33	7344.89		5202.21	bone
ESIN 6 (1000 N)	43.3137	114.496	114.859	1253.44	1253.81	1219.41	1040.13		211.021
ESIN 6 (1500 N)	43.3137	114.285	114.847	1253.45	1254.02	1253.47	1540.08		463.716
ESIN 6 (2000 N)	43.3137	114.065	114.827	1253.47	1254.24	1253.49	2025.85		809.585
ESIN 6 (3000 N)	43.3137	113.621	114.783	1253.52	1254.68	1253.56	3016.64		1815.19
ESIN 6 (4000 N)	43.3137	113.141	114.628	1253.67	1255.16	1253.83	4010.91		3012.31
ESIN 6 (5000 N)	43.3137	112.649	114.43	1253.87	1255.65	1254.07	5005.08		4439.06
ESIN 6 (6000 N)	43.3137	111.81	114.204	1254.1	1256.49	1254.32	5996.05		7801.52
ESIN 6 (7000 N)	43.3137	108.357	113.573	1254.73		1255.36	6127.31	5267.51	13248.1		6127.31	bone
ESIN 7 (1000 N)	43.3137	89.9717	90.8354	1277.47	1278.33	1300.2	1015.56		428.503
ESIN 7 (1500 N)	43.3137	89.6319	90.753	1277.55	1278.67	1277.63	1512.46		810.677
ESIN 7 (2000 N)	43.3137	89.2845	90.6786	1277.62	1279.02	1277.7	2012.56		1274.94
ESIN 7 (3000 N)	43.3137	88.6051	90.6292	1277.67	1279.7	1277.72	2969.36		2732.56
ESIN 7 (4000 N)	43.3137	87.3276	90.4287	1277.87	1280.97	1278.07	3987.42		6079.43
ESIN 7 (5000 N)	43.3137	85.5656	89.9387	1278.36	1282.74	1278.85	4988.07		11266.4		4988.07	embedding
ESIN 7 (6000 N)	43.3137	39.7095	44.7656	1323.54		1363.14	1853.24	1481.93	4966.73		fracture was provoked after failure of embedding
ESIN 8 (1000 N)	43.3137	42.6637	43.4998	1324.8	1325.64	1326.07	1011.36		433.79
ESIN 8 (1500 N)	43.3137	42.2843	43.1504	1325.15	1326.02	1325.5	1511.07		675.214
ESIN 8 (2000 N)	43.3137	41.9941	43.0752	1325.23	1326.31	1325.3	2015.22		1042.55
ESIN 8 (3000 N)	43.3137	41.1428	42.9635	1325.34	1327.16	1325.45	3002.08		2906.16
ESIN 8 (4000 N)	43.3137	40.2791	42.7252	1325.58	1328.02	1325.81	3982.72		4675.48
ESIN 8 (5000 N)	43.3137	34.3992	42.3672	1325.93		1326.29	4937.34	4438.73	22780.1		4438.73	bone

## Sheet: ESIN 1
ESIN 1 (1000 N)				ESIN 1 (1500 N)				ESIN 1 (2000 N)				ESIN 1 (3000 N)				ESIN 1 (4000 N)
Standard travel	Displacement corrected	Standard force		Standard travel	Displacement corrected	Standard force		Standard travel	Displacement corrected	Standard force		Standard travel	Displacement corrected	Standard force		Standard travel	Displacement corrected	Standard force
mm	mm	N		mm	mm	N		mm	mm	N		mm	mm	N		mm	mm	N
0	-0.0554759	123.095		0	-0.0549134	122.201		0	-0.0522292	124.761		0	-0.05167	111.606		0		146.099
5.04255e-07	-0.0554754	122.038		-1.90973e-06	-0.0549153	121.105		-7.99298e-06	-0.0522372	123.675		-3.19719e-06	-0.0516732	110.486		-2.21014e-06	-0.00683558	145.032
8.90493e-07	-0.055475	120.859		1.60933e-07	-0.0549132	120.093		-9.24826e-06	-0.0522385	122.505		-4.32372e-06	-0.0516743	109.466		-7.90715e-06	-0.00684127	143.851
2.72512e-06	-0.0554732	119.78		-4.07696e-07	-0.0549138	119.001		-1.27351e-05	-0.052242	121.452		-3.95894e-06	-0.051674	108.397		-8.28266e-06	-0.00684165	142.738
-5.0211e-06	-0.0554809	118.624		-1.57714e-06	-0.0549149	117.985		-1.01388e-05	-0.0522394	120.301		-4.45247e-06	-0.0516745	107.281		-4.99964e-06	-0.00683837	141.692
-1.38402e-06	-0.0554773	117.558		-3.21865e-07	-0.0549137	116.904		-9.92417e-06	-0.0522392	119.218		0.00327845	-0.0483915	108.415		-1.01066e-05	-0.00684347	140.681
0.0043423	-0.0511336	118.883		0.00416117	-0.0507522	118.231		0.00268169	-0.0495475	119.364		0.00512054	-0.0465495	109.926		6.67334e-05	-0.00676663	139.653
0.00641588	-0.04906	120.269		0.00617537	-0.048738	119.642		0.00536218	-0.0468671	120.974		0.00735887	-0.0443111	112.019		0.00202437	-0.004809	141.372
0.00886257	-0.0466133	122.076		0.00859767	-0.0463157	121.46		0.00762612	-0.0446031	122.582		0.00863095	-0.043039	113.263		0.00283306	-0.00400031	142.469
0.0102515	-0.0452244	123.102		0.00994318	-0.0449702	122.489		0.0102816	-0.0419476	124.527		0.010002	-0.041668	114.624		0.00370601	-0.00312736	143.88
0.0117467	-0.0437292	124.203		0.0114152	-0.0434982	123.594		0.0117681	-0.0404611	125.6		0.0114715	-0.0401985	116.083		0.00465515	-0.00217822	145.619
0.0133479	-0.0421279	125.359		0.0129749	-0.0419384	124.77		0.0133379	-0.0388913	126.733		0.013034	-0.038636	117.623		0.00570069	-0.00113268	147.7
0.0150439	-0.0404319	126.571		0.0146317	-0.0402817	125.972		0.0150061	-0.0372232	127.925		0.0146845	-0.0369855	119.24		0.00683337	0	150.112
0.0168575	-0.0386184	127.821		0.0164163	-0.0384971	127.235		0.016779	-0.0354502	129.168		0.016449	-0.035221	120.938		0.00806193	0.00122856	152.84
0.0187616	-0.0367143	129.104		0.0182827	-0.0366306	128.555		0.0186575	-0.0335717	130.463		0.0182962	-0.0333738	122.714		0.00940168	0.00256831	155.861
0.0207717	-0.0347042	130.429		0.0202305	-0.0346829	129.904		0.0206373	-0.0315919	131.797		0.0202414	-0.0314286	124.567		0.0108502	0.00401679	159.13
0.0228746	-0.0326013	131.798		0.0222882	-0.0326252	131.295		0.0227345	-0.0294948	133.169		0.0222784	-0.0293916	126.482		0.0123797	0.00554629	162.613
0.0250447	-0.0304312	133.2		0.0244631	-0.0304503	132.738		0.0249344	-0.0272948	134.58		0.0244281	-0.0272419	128.461		0.0140151	0.00718178	166.294
0.0273006	-0.0281753	134.633		0.0267349	-0.0281785	134.208		0.0272265	-0.0250028	136.037		0.0266842	-0.0249858	130.496		0.0157415	0.00890816	170.166
0.0296619	-0.025814	136.102		0.0291199	-0.0257935	135.719		0.0295925	-0.0226367	137.54		0.0290518	-0.0226182	132.586		0.0175557	0.0107223	174.241
0.0321394	-0.0233364	137.608		0.0316103	-0.023303	137.276		0.0320256	-0.0202037	139.087		0.0315373	-0.0201327	134.737		0.019458	0.0126246	178.528
0.0347235	-0.0207524	139.158		0.0342053	-0.0207081	138.867		0.0345781	-0.0176511	140.675		0.0341035	-0.0175665	136.955		0.0214581	0.0146247	183.03
0.0374156	-0.0180603	140.759		0.036885	-0.0180284	140.499		0.0372694	-0.0149598	142.305		0.0367495	-0.0149205	139.24		0.0235485	0.0167152	187.753
0.0401798	-0.015296	142.425		0.0396623	-0.015251	142.194		0.0400594	-0.0121698	143.988		0.039516	-0.012154	141.586		0.0257806	0.0189473	192.679
0.0430347	-0.0124412	144.161		0.042504	-0.0124094	143.947		0.0429732	-0.00925599	145.722		0.0423684	-0.00930162	143.989		0.0281329	0.0212995	197.8
0.0459744	-0.00950152	145.958		0.0454334	-0.00947998	145.745		0.0459717	-0.00625751	147.52		0.0453558	-0.0063142	146.446		0.0305947	0.0237613	203.11
0.049005	-0.0064709	147.804		0.0484748	-0.00643861	147.599		0.0490517	-0.0031775	149.378		0.0484611	-0.0032089	148.965		0.0331715	0.0263381	208.608
0.0521654	-0.0033105	149.704		0.0516314	-0.003282	149.513		0.0522292	0	151.3		0.05167	0	151.553		0.035812	0.0289786	214.306
0.0554759	0	151.664		0.0549134	0	151.487		0.0555084	0.00327918	153.274		0.0549334	0.0032634	154.216		0.0385188	0.0316855	220.239
0.0588745	0.0033986	153.692		0.058281	0.00336759	153.524		0.0589032	0.00667395	155.301		0.0582513	0.00658126	156.95		0.0412982	0.0344649	226.395
0.0623074	0.00683154	155.785		0.0617214	0.00680798	155.634		0.0624357	0.0102064	157.383		0.0616637	0.00999372	159.758		0.0441733	0.0373399	232.752
0.0658313	0.0103554	157.944		0.0652543	0.010341	157.82		0.0660486	0.0138194	159.528		0.0652137	0.0135437	162.635		0.0471552	0.0403219	239.29
0.0695124	0.0140365	160.169		0.0688812	0.0139679	160.056		0.0697083	0.017479	161.747		0.0688799	0.0172099	165.584		0.0502831	0.0434498	246.011
0.0733149	0.017839	162.462		0.0726205	0.0177072	162.359		0.0734269	0.0211976	164.026		0.0726517	0.0209817	168.62		0.0535338	0.0467004	252.925
0.0772355	0.0217597	164.809		0.0764934	0.02158	164.741		0.0772701	0.0250409	166.371		0.0764904	0.0248204	171.744		0.0568444	0.050011	260.05
0.0812331	0.0257573	167.206		0.0804442	0.0255308	167.159		0.0812622	0.029033	168.791		0.0804166	0.0287466	174.946		0.0602119	0.0533785	267.379
0.0852983	0.0298225	169.675		0.0844568	0.0295434	169.65		0.0853755	0.0331463	171.28		0.0844566	0.0327866	178.226		0.0636829	0.0568495	274.906
0.089461	0.0339851	172.208		0.0885844	0.033671	172.205		0.089534	0.0373048	173.825		0.0886487	0.0369787	181.591		0.0673021	0.0604687	282.613
0.0937489	0.038273	174.804		0.0928898	0.0379764	174.802		0.0937844	0.0415552	176.419		0.0929221	0.0412521	185.037		0.0710568	0.0642234	290.496
0.0981323	0.0426565	177.459		0.0973232	0.0424098	177.455		0.0981972	0.0459679	179.071		0.097244	0.045574	188.548		0.0748794	0.0680461	298.583
0.102607	0.0471316	180.162		0.101754	0.0468409	180.172		0.102773	0.0505438	181.779		0.101685	0.0500149	192.118		0.0787718	0.0719385	306.874
0.107198	0.051722	182.91		0.106223	0.0513101	182.931		0.10737	0.0551404	184.543		0.106305	0.0546349	195.765		0.0827403	0.0759069	315.369
0.111945	0.056469	185.708		0.110834	0.055921	185.772		0.111951	0.0597221	187.354		0.111033	0.0593635	199.484		0.0868528	0.0800194	324.044
0.116807	0.061331	188.551		0.115597	0.060684	188.684		0.116661	0.0644313	190.227		0.115786	0.0641163	203.259		0.0911608	0.0843274	332.916
0.121694	0.0662178	191.452		0.120436	0.065523	191.641		0.121541	0.0693116	193.154		0.120568	0.0688977	207.098		0.0955473	0.0887139	341.991
0.126646	0.07117	194.42		0.125388	0.0704744	194.673		0.126496	0.0742665	196.117		0.125498	0.0738277	211.022		0.099965	0.0931317	351.29
0.131719	0.0762427	197.448		0.130522	0.075609	197.791		0.131508	0.079279	199.127		0.130587	0.0789174	215.026		0.104443	0.0976101	360.858
0.136915	0.0814391	200.544		0.135776	0.0808624	200.974		0.13668	0.084451	202.222		0.135765	0.084095	219.1		0.109049	0.102216	370.72
0.142176	0.0867001	203.704		0.141032	0.0861183	204.224		0.142	0.0897711	205.417		0.141033	0.0893629	223.258		0.113747	0.106913	380.801
0.147491	0.0920149	206.924		0.146343	0.09143	207.547		0.147337	0.0951074	208.696		0.14645	0.0947801	227.523		0.118523	0.11169	391.012
0.152925	0.0974486	210.215		0.15185	0.0969368	210.93		0.152775	0.100546	212.045		0.151969	0.100299	231.885		0.123483	0.116649	401.354
0.158511	0.103035	213.574		0.157429	0.102516	214.375		0.158436	0.106207	215.453		0.157459	0.105789	236.324		0.12864	0.121807	411.889
0.164166	0.10869	216.997		0.163013	0.108099	217.88		0.164249	0.11202	218.934		0.163074	0.111404	240.852		0.133841	0.127008	422.631
0.169931	0.114455	220.487		0.16875	0.113836	221.439		0.170095	0.117865	222.485		0.168844	0.117174	245.47		0.138988	0.132155	433.573
0.175838	0.120362	224.046		0.174657	0.119743	225.056		0.175964	0.123735	226.114		0.174645	0.122975	250.178		0.144185	0.137351	444.71
0.181782	0.126306	227.675		0.180646	0.125733	228.745		0.181912	0.129682	229.817		0.180538	0.128868	254.999		0.149552	0.142719	456.031
0.187792	0.132316	231.38		0.186725	0.131812	232.483		0.187932	0.135703	233.584		0.186605	0.134935	259.933		0.155042	0.148209	467.499
0.193942	0.138466	235.159		0.19297	0.138057	236.31		0.194162	0.141933	237.391		0.192727	0.141057	264.964		0.160601	0.153767	479.122
0.200181	0.144705	239.018		0.199215	0.144302	240.256		0.200546	0.148316	241.238		0.198953	0.147283	270.107		0.166329	0.159496	490.975
0.206575	0.151099	242.953		0.20549	0.150577	244.285		0.206893	0.154664	245.155		0.205401	0.153731	275.373		0.172169	0.165336	503.113
0.213174	0.157698	246.945		0.211922	0.157008	248.324		0.213275	0.161046	249.163		0.21192	0.16025	280.805		0.178052	0.171218	515.497
0.219794	0.164319	251.007		0.218464	0.163551	252.466		0.219735	0.167506	253.267		0.218418	0.166748	286.404		0.184108	0.177275	528.088
0.226461	0.170985	255.143		0.225214	0.170301	256.69		0.226283	0.174053	257.457		0.225046	0.173376	292.13		0.19028	0.183447	540.892
0.2333	0.177824	259.354		0.232099	0.177186	260.928		0.232989	0.18076	261.721		0.231791	0.180121	297.998		0.196559	0.189726	553.911
0.240129	0.184653	263.649		0.238887	0.183974	265.261		0.239899	0.18767	266.061		0.238736	0.187066	304.027		0.202896	0.196062	567.132
0.247039	0.191563	268.023		0.245699	0.190786	269.721		0.246913	0.194684	270.494		0.245839	0.194169	310.202		0.209311	0.202477	580.52
0.254155	0.198679	272.451		0.252678	0.197765	274.247		0.25405	0.20182	275.033		0.252859	0.201189	316.539		0.215856	0.209022	594.08
0.261367	0.205892	276.955		0.25979	0.204877	278.862		0.261276	0.209047	279.675		0.259936	0.208266	323.056		0.222548	0.215714	607.782
0.268754	0.213278	281.55		0.26706	0.212147	283.575		0.268528	0.216299	284.405		0.26713	0.21546	329.776		0.229344	0.222511	621.605
0.276169	0.220693	286.236		0.274393	0.219479	288.348		0.275937	0.223708	289.215		0.27441	0.22274	336.707		0.236127	0.229294	635.599
0.283553	0.228077	290.999		0.281872	0.226959	293.241		0.283569	0.231339	294.107		0.281844	0.230174	343.787		0.242999	0.236165	649.835
0.291095	0.235619	295.836		0.289582	0.234669	298.228		0.291325	0.239096	299.063		0.289347	0.237677	351.001		0.249939	0.243105	664.303
0.298817	0.243341	300.75		0.297369	0.242455	303.296		0.299021	0.246792	304.084		0.29703	0.24536	358.404		0.256936	0.250103	678.977
0.306739	0.251264	305.753		0.305151	0.250238	308.488		0.306694	0.254465	309.189		0.304938	0.253268	366.015		0.264103	0.25727	693.819
0.314595	0.259119	310.844		0.312925	0.258011	313.773		0.314579	0.26235	314.406		0.312889	0.261219	373.808		0.271439	0.264606	708.873
0.322413	0.266937	316.039		0.32092	0.266006	319.128		0.322489	0.270259	319.739		0.320813	0.269143	381.753		0.278927	0.272094	724.189
0.330373	0.274898	321.378		0.329045	0.274132	324.61		0.330405	0.278175	325.167		0.328821	0.277151	389.844		0.286527	0.279693	739.779
0.338496	0.28302	326.853		0.33714	0.282227	330.214		0.338454	0.286225	330.715		0.337086	0.285416	398.112		0.294121	0.287288	755.641
0.346809	0.291333	332.417		0.345229	0.290315	335.919		0.346739	0.294509	336.438		0.34543	0.29376	406.54		0.301798	0.294964	771.754
0.355138	0.299663	338.066		0.353383	0.298469	341.754		0.355242	0.303013	342.342		0.353755	0.302085	415.09		0.309647	0.302813	788.062
0.36368	0.308204	343.867		0.361772	0.306859	347.751		0.363692	0.311462	348.379		0.362052	0.310382	423.79		0.317651	0.310817	804.492
0.372446	0.31697	349.83		0.370413	0.315499	353.888		0.372178	0.319949	354.563		0.370476	0.318806	432.654		0.325764	0.31893	821.06
0.381217	0.325741	355.92		0.379184	0.324271	360.181		0.380927	0.328698	360.927		0.379173	0.327503	441.69		0.333817	0.326984	837.793
0.38991	0.334434	362.122		0.387962	0.333049	366.644		0.390039	0.33781	367.47		0.388023	0.336353	450.892		0.341964	0.335131	854.763
0.398823	0.343347	368.46		0.396768	0.341854	373.249		0.398991	0.346762	374.149		0.39693	0.34526	460.259		0.350148	0.343314	871.9
0.40787	0.352394	374.959		0.405851	0.350937	379.997		0.407819	0.35559	381.013		0.405839	0.354169	469.813		0.358479	0.351646	889.156
0.416885	0.361409	381.589		0.415131	0.360217	386.854		0.41675	0.364521	388.104		0.414885	0.363215	479.57		0.366922	0.360089	906.556
0.425836	0.37036	388.326		0.424352	0.369439	393.802		0.425896	0.373667	395.388		0.424148	0.372478	489.48		0.375583	0.368749	924.174
0.434885	0.379409	395.193		0.433524	0.378611	400.879		0.435061	0.382832	402.823		0.433504	0.381834	499.497		0.384421	0.377588	941.941
0.444285	0.388809	402.235		0.442885	0.387972	408.142		0.444379	0.39215	410.426		0.442797	0.391127	509.664		0.393211	0.386378	959.787
0.453895	0.398419	409.436		0.452209	0.397295	415.56		0.453933	0.401703	418.227		0.452185	0.400515	520.049		0.402142	0.395308	977.764
0.463538	0.408062	416.774		0.461544	0.406631	423.131		0.463567	0.411337	426.231		0.46167	0.41	530.621		0.411332	0.404498	995.859
0.473176	0.4177	424.284		0.471141	0.416228	430.911		0.473212	0.420983	434.43		0.471173	0.419503	541.354		0.420662	0.413828	1014.01
0.483047	0.427572	431.949		0.481053	0.42614	438.871		0.48306	0.430831	442.841		0.480773	0.429103	552.273		0.429818	0.422984	1032.21
0.493147	0.437671	439.706		0.490906	0.435993	446.977		0.492995	0.440765	451.468		0.490753	0.439083	563.363		0.439026	0.432192	1050.57
0.50317	0.447694	447.544		0.500762	0.445849	455.231		0.502934	0.450705	460.245		0.500806	0.449136	574.543		0.448363	0.441529	1069.06
0.513124	0.457649	455.509		0.51093	0.456017	463.67		0.5128	0.46057	469.122		0.51073	0.45906	585.771		0.457766	0.450933	1087.53
0.523071	0.467595	463.604		0.521117	0.466203	472.28		0.522749	0.47052	478.114		0.520853	0.469183	597.09		0.46724	0.460406	1105.9
0.532829	0.477353	471.823		0.531023	0.476109	481.071		0.532845	0.480616	487.262		0.531161	0.479491	608.513		0.47702	0.470186	1124.23
0.5426	0.487125	480.179		0.540845	0.485932	490.012		0.542932	0.490703	496.548		0.541162	0.489492	620.034		0.486996	0.480162	1142.5
0.552659	0.497184	488.658		0.550799	0.495885	499.088		0.552839	0.50061	505.994		0.550931	0.499261	631.621		0.496893	0.49006	1160.63
0.562752	0.507277	497.222		0.560686	0.505773	508.286		0.562731	0.510501	515.568		0.560779	0.509109	643.282		0.506884	0.50005	1178.65
0.572673	0.517197	505.866		0.57063	0.515716	517.566		0.572763	0.520534	525.227		0.570699	0.519029	654.973		0.516983	0.51015	1196.59
0.582697	0.527221	514.615		0.580696	0.525782	526.951		0.582857	0.530628	534.941		0.580596	0.528926	666.663		0.527004	0.520171	1214.28
0.592988	0.537512	523.486		0.590731	0.535818	536.462		0.592887	0.540658	544.749		0.590647	0.538977	678.367		0.53683	0.529996	1231.51
0.603065	0.547589	532.491		0.600718	0.545805	546.108		0.602888	0.550659	554.611		0.600761	0.549091	690.137		0.546716	0.539883	1248.35
0.612917	0.557441	541.619		0.610808	0.555894	555.896		0.612769	0.560539	564.491		0.610763	0.559093	701.99		0.556784	0.549951	1264.87
0.622796	0.567321	550.868		0.620867	0.565954	565.821		0.622642	0.570413	574.387		0.620847	0.569177	713.936		0.566801	0.559968	1281.07
0.632727	0.577251	560.226		0.630813	0.5759	575.808		0.632684	0.580455	584.358		0.630968	0.579298	725.966		0.576632	0.569799	1296.93
0.642616	0.58714	569.676		0.640711	0.585797	585.837		0.642707	0.590477	594.432		0.640991	0.589321	738.011		0.586509	0.579676	1312.5
0.652631	0.597155	579.194		0.65074	0.595827	595.959		0.652384	0.600155	604.571		0.650849	0.599179	750.024		0.596584	0.589751	1327.7
0.66273	0.607254	588.815		0.660863	0.60595	606.199		0.661889	0.609659	614.776		0.660767	0.609097	762.042		0.606674	0.599841	1342.43
0.672752	0.617276	598.551		0.670891	0.615977	616.549		0.671764	0.619535	625.077		0.670817	0.619147	774.137		0.616698	0.609864	1356.8
0.682788	0.627312	608.429		0.680771	0.625858	627.006		0.682082	0.629853	635.488		0.680802	0.629132	786.306		0.626842	0.620009	1370.92
0.692855	0.637379	618.457		0.690737	0.635823	637.54		0.692335	0.640105	646.005		0.690657	0.638987	798.558		0.636823	0.62999	1384.85
0.702838	0.647362	628.587		0.700845	0.645931	648.104		0.702353	0.650124	656.636		0.700564	0.648894	810.874		0.646673	0.639839	1398.65
0.712718	0.657242	638.738		0.710906	0.655993	658.698		0.712375	0.660146	667.414		0.710641	0.658971	823.211		0.656724	0.64989	1412.4
0.722666	0.66719	648.918		0.720897	0.665984	669.312		0.72242	0.67019	678.343		0.720733	0.669063	835.532		0.666935	0.660101	1426.02
0.732781	0.677305	659.188		0.730811	0.675897	679.888		0.732601	0.680371	689.318		0.730791	0.679121	847.893		0.676855	0.670022	1439.44
0.742918	0.687442	669.552		0.740713	0.6858	690.431		0.742807	0.690578	700.287		0.74087	0.6892	860.299		0.686724	0.679891	1452.78
0.752858	0.697382	680.014		0.750658	0.695745	701.001		0.752833	0.700604	711.283		0.750783	0.699113	872.756		0.696939	0.690106	1466.23
0.762718	0.707242	690.554		0.760731	0.705818	711.65		0.762877	0.710648	722.339		0.760725	0.709055	885.287		0.707049	0.700215	1479.89
0.772766	0.71729	701.128		0.770529	0.715616	722.343		0.772922	0.720693	733.448		0.770867	0.719197	897.807		0.716801	0.709968	1493.75
0.782905	0.727429	711.704		0.780036	0.725123	733.045		0.78286	0.730631	744.581		0.780955	0.729285	910.104		0.726587	0.719753	1507.84
0.792916	0.73744	722.305		0.789704	0.73479	743.805		0.79274	0.740511	755.695		0.790842	0.739172	920.995		0.736621	0.729788	1522.12
0.802873	0.747397	732.883		0.799989	0.745076	754.659		0.802663	0.750434	766.828		0.811023	0.759353	915.687		0.746627	0.739793	1536.52
0.812742	0.757266	743.406		0.810334	0.755421	765.597		0.812682	0.760452	778.032		0.820914	0.769244	910.682		0.756693	0.74986	1550.98
0.822633	0.767157	753.913		0.82037	0.765457	776.647		0.822771	0.770541	789.297		0.830702	0.779032	905.795		0.766854	0.76002	1565.6
0.832672	0.777196	764.495		0.830346	0.775433	787.857		0.832777	0.780548	800.623		0.840652	0.788982	901.048		0.776944	0.770111	1580.44
0.842705	0.787229	775.143		0.840379	0.785466	799.207		0.842745	0.790515	811.992		0.850724	0.799054	896.38		0.786969	0.780135	1595.5
0.852324	0.796848	785.803		0.850496	0.795583	810.646		0.852838	0.800609	823.363		0.860723	0.809053	891.769		0.79693	0.790096	1610.75
0.861793	0.806318	796.481		0.86071	0.805796	822.068		0.862944	0.810715	834.74		0.870808	0.819138	887.289		0.806843	0.80001	1626.1
0.871818	0.816343	807.23		0.870844	0.815931	833.501		0.87288	0.820651	846.164		0.880963	0.829293	883.102		0.816693	0.809859	1641.41
0.882261	0.826785	818.074		0.880844	0.825931	844.992		0.88281	0.830581	857.615		0.890961	0.839291	880.356		0.826496	0.819662	1656.69
0.892438	0.836962	829.007		0.890905	0.835992	856.547		0.892677	0.840447	869.116		0.900952	0.849282	888.879		0.836501	0.829667	1672.06
0.902379	0.846903	840.055		0.90092	0.846007	868.133		0.902523	0.850293	880.708		0.910954	0.859284	902.41		0.846634	0.8398	1687.51
0.912374	0.856898	851.258		0.910836	0.855923	879.708		0.912535	0.860306	892.367		0.920853	0.869183	916.037		0.856689	0.849856	1703.01
0.922415	0.866939	862.582		0.92069	0.865777	891.243		0.922647	0.870418	904.016		0.930616	0.878946	929.63		0.866651	0.859818	1718.54
0.932602	0.877126	873.883		0.930649	0.875735	902.804		0.932641	0.880412	915.637		0.940492	0.888822	943.238		0.876794	0.86996	1734.04
0.942806	0.88733	885.13		0.940724	0.885811	914.432		0.942736	0.890507	927.269		0.950578	0.898908	956.924		0.887039	0.880205	1749.49
0.952829	0.897353	896.375		0.9508	0.895887	926.09		0.953036	0.900807	938.935		0.96068	0.90901	970.659		0.897067	0.890234	1764.94
0.962885	0.907409	907.67		0.960754	0.90584	937.769		0.963093	0.910864	950.646		0.970664	0.918994	984.422		0.907026	0.900192	1780.4
0.972935	0.917459	918.984		0.970771	0.915858	949.443		0.972957	0.920727	962.411		0.98071	0.92904	998.212		0.916861	0.910027	1795.94
0.982878	0.927402	930.275		0.980905	0.925992	961.092		0.982819	0.93059	974.234		0.990923	0.939253	1011.98		0.926671	0.919838	1811.62
0.992748	0.937272	941.503		0.990931	0.936017	972.713		0.992723	0.940494	986.066		1.00104	0.94937	1025.69		0.936581	0.929748	1827.43
1.00264	0.947166	952.71		1.00086	0.945947	984.338		1.00259	0.95036	997.876		1.01102	0.959347	1039.36		0.94666	0.939827	1843.25
1.01264	0.957163	963.93		1.01075	0.955833	995.961		1.01263	0.960403	1009.67		1.021	0.96933	1053.04		0.956675	0.949842	1859.1
1.02272	0.967246	974.778		1.0206	0.965689	1007.61		1.02276	0.970527	1021.48		1.03082	0.979153	1066.69		0.966664	0.959831	1874.96
1.03275	0.977271	984.527		1.0305	0.975589	1019.3		1.03275	0.980522	1033.33		1.0406	0.988926	1080.35		0.976907	0.970073	1890.89
1.04272	0.987245	992.892		1.04061	0.985693	1030.98		1.04282	0.990588	1045.24		1.0506	0.998931	1094.02		0.987027	0.980194	1906.86
1.05279	0.997312	999.909		1.05067	0.995753	1042.57		1.05295	1.00072	1057.25		1.06073	1.00906	1107.62		0.996953	0.99012	1922.92
1.06134	1.00586	1005.57		1.06064	1.00573	1054.09		1.06297	1.01074	1069.27		1.07065	1.01898	1121.1		1.00688	1.00004	1939.05
1.06551	1.01003	1009.85		1.07084	1.01593	1065.59		1.07282	1.02059	1081.21		1.08065	1.02898	1134.5		1.01678	1.00994	1955.15
1.06703	1.01156	1012.75		1.08109	1.02618	1077.07		1.08271	1.03048	1093.12		1.09095	1.03928	1147.85		1.02658	1.01974	1971.13
1.0681	1.01263	1014.28		1.09106	1.03615	1088.55		1.09279	1.04056	1105.07		1.10104	1.04937	1161.12		1.03659	1.02976	1987.03
1.06963	1.01416	1013.21		1.10091	1.04599	1100.05		1.10284	1.05061	1117.04		1.11087	1.0592	1174.3		1.04672	1.03989	2002.89
1.06998	1.0145	1011.01		1.11082	1.05591	1111.54		1.11273	1.0605	1129.03		1.12067	1.069	1187.42		1.05669	1.04986	2018.71
1.07018	1.01471	1008.56		1.12068	1.06576	1122.98		1.12261	1.07038	1141.08		1.13054	1.07887	1200.49		1.06664	1.05981	2034.57
1.0703	1.01482	1006.15		1.13059	1.07568	1134.35		1.13266	1.08043	1153.13		1.14023	1.08856	1213.53		1.07678	1.06994	2050.55
1.07037	1.01489	1003.78		1.1407	1.08578	1145.68		1.14275	1.09052	1165.14		1.14999	1.09832	1226.59		1.08684	1.08001	2066.54
1.07042	1.01494	1001.41		1.15078	1.09586	1156.99		1.15275	1.10052	1177.15		1.15992	1.10825	1239.69		1.09671	1.08987	2082.29
1.07044	1.01496	999.089		1.16076	1.10585	1168.31		1.16284	1.11061	1189.18		1.16983	1.11816	1252.85		1.10662	1.09979	2097.83
1.07045	1.01497	996.834		1.17089	1.11598	1179.66		1.1728	1.12057	1201.26		1.17987	1.1282	1266.13		1.11677	1.10994	2113.31
1.07046	1.01498	994.642		1.181	1.12609	1191.03		1.18267	1.13044	1213.4		1.19025	1.13858	1279.56		1.12691	1.12008	2128.72
1.07045	1.01498	992.518		1.19094	1.13603	1202.33		1.19275	1.14052	1225.58		1.20052	1.14885	1293.12		1.13685	1.13002	2143.98
1.07046	1.01498	990.467		1.20074	1.14583	1213.51		1.20293	1.1507	1237.73		1.21049	1.15882	1306.68		1.14673	1.1399	2159.13
1.07045	1.01497	988.47		1.21075	1.15583	1224.69		1.21287	1.16064	1249.79		1.22052	1.16885	1320.25		1.15677	1.14993	2174.12
1.07044	1.01497	986.531		1.22084	1.16593	1235.87		1.22275	1.17052	1261.81		1.23072	1.17905	1333.88		1.16687	1.16004	2188.79
1.07044	1.01496	984.644		1.23081	1.1759	1247.03		1.23297	1.18074	1273.86		1.24088	1.18921	1347.49		1.17683	1.17	2203.18
1.07043	1.01496	982.8		1.24066	1.18574	1258.21		1.24302	1.19079	1285.95		1.25082	1.19915	1361.06		1.18685	1.18002	2217.48
				1.25061	1.19569	1269.41		1.25275	1.20052	1298.08		1.26075	1.20908	1374.65		1.19684	1.19	2231.75
				1.26071	1.2058	1280.55		1.26256	1.21033	1310.21		1.2708	1.21913	1388.21		1.20671	1.19988	2245.99
				1.27076	1.21584	1291.62		1.27261	1.22038	1322.34		1.28082	1.22915	1401.67		1.21658	1.20975	2260.23
				1.28078	1.22587	1302.69		1.28263	1.2304	1334.41		1.29078	1.23911	1415.07		1.22672	1.21988	2274.39
				1.29084	1.23593	1313.78		1.29271	1.24048	1346.4		1.30085	1.24918	1428.5		1.23677	1.22994	2288.32
				1.30076	1.24585	1324.87		1.30288	1.25065	1358.39		1.31082	1.25915	1441.95		1.24663	1.2398	2302
				1.31068	1.25577	1335.98		1.31295	1.26072	1370.41		1.32064	1.26897	1455.42		1.25676	1.24993	2315.62
				1.32086	1.26595	1347.07		1.32295	1.27072	1382.45		1.33062	1.27895	1468.96		1.26699	1.26016	2329.27
				1.33094	1.27602	1358.07		1.33289	1.28066	1394.5		1.34084	1.28917	1482.47		1.27685	1.27002	2342.94
				1.34082	1.2859	1368.96		1.3428	1.29057	1406.54		1.35078	1.29911	1495.86		1.28658	1.27975	2356.58
				1.35083	1.29591	1379.83		1.35265	1.30042	1418.5		1.36065	1.30898	1509.15		1.29654	1.28971	2370.21
				1.36104	1.30612	1390.72		1.36249	1.31026	1430.41		1.37089	1.31922	1522.48		1.30655	1.29972	2383.77
				1.37092	1.316	1401.61		1.37248	1.32025	1442.33		1.381	1.32933	1535.88		1.3166	1.30976	2397.21
				1.38065	1.32573	1412.5		1.38261	1.33039	1454.27		1.39079	1.33912	1549.29		1.32676	1.31993	2410.62
				1.39057	1.33566	1423.4		1.3927	1.34047	1466.21		1.40057	1.3489	1562.67		1.3369	1.33006	2424.15
				1.40062	1.3457	1434.25		1.40268	1.35045	1478.13		1.41057	1.3589	1576.03		1.34693	1.3401	2437.81
				1.41065	1.35574	1445.02		1.41284	1.36061	1489.99		1.42059	1.36892	1589.33		1.35695	1.35012	2451.55
				1.42078	1.36587	1455.72		1.42304	1.37081	1501.75		1.43068	1.37901	1602.48		1.36693	1.3601	2465.29
				1.43094	1.37602	1466.4		1.43305	1.38082	1513.46		1.44086	1.38919	1615.52		1.37688	1.37005	2478.97
				1.44098	1.38606	1476.51		1.44298	1.39075	1525.1		1.45091	1.39924	1628.33		1.38675	1.37991	2492.52
				1.45097	1.39606	1485.31		1.4528	1.40057	1536.68		1.46094	1.40927	1640.01		1.39668	1.38985	2506.01
				1.4609	1.40599	1492.58		1.46262	1.41039	1548.22		1.47097	1.4193	1639.14		1.40672	1.39988	2519.49
				1.47067	1.41576	1498.36		1.4726	1.42037	1559.73		1.48094	1.42927	1627.49		1.41676	1.40993	2532.94
				1.47809	1.42318	1502.64		1.4827	1.43047	1571.15		1.49082	1.43915	1615.55		1.4267	1.41987	2546.33
				1.48125	1.42633	1505.44		1.49266	1.44043	1582.45		1.50069	1.44902	1603.54		1.43671	1.42988	2559.56
				1.48246	1.42755	1506.8		1.50264	1.45041	1593.69		1.51067	1.459	1591.59		1.44686	1.44003	2572.64
				1.48405	1.42914	1505.27		1.51288	1.46065	1604.88		1.52081	1.46914	1579.77		1.45692	1.45009	2585.6
				1.48449	1.42957	1502.44		1.523	1.47077	1616.01		1.53095	1.47928	1568.1		1.46686	1.46003	2598.48
				1.48474	1.42983	1498.82		1.53292	1.48069	1627.13		1.54087	1.4892	1556.65		1.47672	1.46988	2611.26
				1.48489	1.42997	1495.12		1.54286	1.49063	1638.22		1.55088	1.49921	1545.56		1.48658	1.47975	2623.99
				1.48498	1.43007	1491.55		1.55276	1.50053	1649.23		1.56099	1.50932	1535.7		1.49652	1.48969	2636.69
				1.48504	1.43012	1488.07		1.56255	1.51032	1660.16		1.57093	1.51926	1538.47		1.50663	1.4998	2649.24
				1.48506	1.43015	1484.67		1.57256	1.52034	1670.99		1.58082	1.52915	1552.15		1.51665	1.50982	2661.5
				1.48509	1.43018	1481.38		1.58272	1.5305	1681.76		1.59068	1.53901	1566.19		1.52663	1.51979	2673.48
				1.4851	1.43018	1478.2		1.5927	1.54047	1692.45		1.6006	1.54893	1580.46		1.53681	1.52998	2685.2
				1.4851	1.43019	1475.13		1.60268	1.55045	1703.12		1.61058	1.55891	1594.9		1.54703	1.54019	2696.47
				1.4851	1.43019	1472.15		1.61283	1.5606	1713.8		1.62066	1.56899	1609.39		1.55696	1.55013	2707.14
				1.4851	1.43019	1469.27		1.62288	1.57065	1724.42		1.63067	1.579	1623.87		1.56683	1.56	2717.04
				1.48509	1.43018	1466.48		1.63273	1.5805	1734.82		1.64067	1.589	1638.35		1.57677	1.56994	2725.87
				1.48509	1.43017	1463.77		1.64266	1.59044	1744.99		1.6509	1.59923	1652.84		1.58663	1.5798	2733.34
				1.48509	1.43017	1461.15		1.65281	1.60058	1754.98		1.66105	1.60938	1667.33		1.59659	1.58976	2739.4
				1.48508	1.43016	1458.59		1.66294	1.61072	1764.76		1.67095	1.61928	1681.87		1.60676	1.59993	2743.96
				1.48507	1.43016	1456.11		1.67289	1.62066	1774.3		1.6808	1.62913	1696.41		1.61683	1.61	2746.85
				1.48507	1.43015	1453.69		1.68278	1.63056	1783.62		1.69073	1.63906	1710.87		1.62677	1.61994	2748.05
								1.69281	1.64058	1792.67		1.70059	1.64892	1725.25		1.63689	1.63006	2747.62
								1.70286	1.65064	1801.39		1.71063	1.65896	1739.55		1.64703	1.6402	2745.4
								1.71281	1.66058	1809.79		1.7208	1.66913	1753.79		1.65693	1.6501	2741.15
								1.72283	1.6706	1817.99		1.73076	1.67909	1767.96		1.66672	1.65989	2735.12
								1.73281	1.68058	1826.05		1.74078	1.68911	1782.12		1.67676	1.66993	2727.77
								1.74268	1.69045	1833.98		1.75093	1.69926	1796.29		1.68689	1.68005	2719.42
								1.7526	1.70037	1841.87		1.76099	1.70932	1810.45		1.69683	1.68999	2710.16
								1.7628	1.71057	1849.68		1.77085	1.71918	1824.45		1.7067	1.69986	2700.42
								1.77286	1.72063	1857.35		1.7807	1.72903	1838.31		1.71668	1.70984	2690.69
								1.78272	1.73049	1864.9		1.79076	1.73909	1852.15		1.72675	1.71991	2681.09
								1.79284	1.74061	1872.46		1.80082	1.74915	1865.95		1.73675	1.72991	2671.76
								1.80301	1.75078	1880.04		1.8107	1.75903	1879.68		1.7468	1.73996	2663.17
								1.81283	1.7606	1887.61		1.82056	1.76889	1893.43		1.75691	1.75007	2655.68
								1.82258	1.77035	1895.12		1.83063	1.77896	1907.16		1.76685	1.76002	2649.25
								1.83257	1.78034	1902.56		1.84072	1.78905	1920.78		1.77674	1.76991	2643.93
								1.8426	1.79037	1909.89		1.85069	1.79902	1934.32		1.78687	1.78004	2639.72
								1.85265	1.80042	1917.03		1.86084	1.80917	1947.85		1.79696	1.79013	2636.47
								1.8628	1.81057	1924.03		1.87088	1.81921	1961.38		1.80681	1.79998	2633.97
								1.87291	1.82068	1930.94		1.88073	1.82906	1974.89		1.81682	1.80999	2632.18
								1.88294	1.83071	1937.73		1.89066	1.83899	1988.4		1.82707	1.82023	2631.06
								1.89299	1.84076	1944.36		1.90087	1.8492	2001.85		1.84667	1.83983	2630.11
								1.90295	1.85073	1950.82		1.9109	1.85923	2015.13		1.86663	1.8598	2628.75
								1.91287	1.86064	1957.05		1.92075	1.86908	2028.25		1.87668	1.86985	2627.06
								1.92271	1.87049	1963.15		1.93088	1.87921	2041.34		1.88682	1.87998	2624.3
								1.93265	1.88042	1969.33		1.94103	1.88936	2054.45		1.89698	1.89015	2620.47
								1.94272	1.89049	1975.7		1.95085	1.89918	2067.55		1.907	1.90017	2612.19
								1.9528	1.90057	1982.29		1.96063	1.90896	2080.62		1.917	1.91017	2599.84
								1.96274	1.91051	1988.57		1.97065	1.91898	2093.65		1.92691	1.92008	2585.9
								1.97276	1.92053	1993.81		1.98068	1.92901	2106.61		1.9368	1.92996	2571.37
								1.98294	1.93071	1997.82		1.99073	1.93906	2119.42		1.94661	1.93978	2556.81
								1.99285	1.94062	2000.71		2.00087	1.9492	2132.17		1.95655	1.94971	2542.81
								2.00035	1.94812	2002.56		2.01096	1.95929	2144.93		1.96666	1.95983	2529.74
								2.0045	1.95227	2003.09		2.02096	1.96929	2157.69		1.97677	1.96994	2517.81
								2.00537	1.95314	2001.6		2.03091	1.97924	2170.41		1.98676	1.97993	2507.14
								2.00609	1.95386	1998.81		2.04082	1.98915	2183.1		1.99678	1.98995	2496.26
								2.00652	1.95429	1994.74		2.05074	1.99907	2195.7		2.00698	2.00015	2441.82
								2.00677	1.95454	1989.96		2.06057	2.0089	2208.22
								2.00691	1.95468	1985.24		2.07049	2.01882	2220.7
								2.00699	1.95477	1980.77		2.08055	2.02888	2233.2
								2.00705	1.95482	1976.49		2.09068	2.03901	2245.7
								2.00708	1.95485	1972.36		2.10073	2.04906	2258.16
								2.0071	1.95487	1968.39		2.11084	2.05917	2270.54
								2.0071	1.95487	1964.59		2.12104	2.06937	2282.81
								2.0071	1.95487	1960.93		2.13109	2.07942	2295
								2.0071	1.95487	1957.41		2.14102	2.08935	2307.12
								2.0071	1.95487	1954.02		2.15087	2.0992	2319.16
								2.00709	1.95486	1950.75		2.16072	2.10905	2331.17
								2.00709	1.95486	1947.59		2.1706	2.11893	2343.18
								2.00708	1.95485	1944.53		2.18064	2.12897	2355.09
												2.19065	2.13898	2366.89
												2.20064	2.14897	2378.6
												2.21084	2.15917	2390.28
												2.22106	2.16939	2401.9
												2.231	2.17933	2413.51
												2.24089	2.18922	2425.11
												2.25082	2.19915	2436.65
												2.26065	2.20898	2448.07
												2.27059	2.21892	2459.38
												2.28072	2.22905	2470.65
												2.29074	2.23907	2481.89
												2.30066	2.24899	2493.12
												2.31076	2.25909	2504.41
												2.32084	2.26917	2515.71
												2.33075	2.27908	2526.88
												2.34062	2.28895	2537.91
												2.35075	2.29908	2548.91
												2.36094	2.30927	2559.91
												2.37093	2.31926	2570.86
												2.38077	2.3291	2581.8
												2.39076	2.33909	2592.71
												2.40086	2.34919	2603.49
												2.41084	2.35917	2614.1
												2.42084	2.36917	2624.68
												2.43087	2.3792	2635.28
												2.44073	2.38906	2645.86
												2.45056	2.39889	2656.45
												2.46071	2.40904	2666.99
												2.47083	2.41916	2677.4
												2.48072	2.42905	2687.64
												2.49079	2.43912	2697.84
												2.50101	2.44934	2708.08
												2.51091	2.45924	2718.34
												2.52064	2.46897	2728.58
												2.53058	2.47891	2738.77
												2.54058	2.48891	2748.9
												2.55058	2.49891	2758.9
												2.56072	2.50905	2768.79
												2.57089	2.51922	2778.67
												2.58093	2.52926	2788.54
												2.591	2.53933	2798.38
												2.60099	2.54932	2808.14
												2.61092	2.55925	2817.8
												2.62078	2.56911	2827.31
												2.63068	2.57901	2836.75
												2.64071	2.58904	2846.18
												2.65079	2.59912	2855.63
												2.66073	2.60906	2865.05
												2.67068	2.61901	2874.38
												2.68082	2.62915	2883.61
												2.69099	2.63932	2892.77
												2.70097	2.6493	2901.91
												2.71079	2.65912	2910.98
												2.7206	2.66893	2920.03
												2.73052	2.67885	2929.11
												2.74062	2.68895	2938.11
												2.75069	2.69902	2946.94
												2.76065	2.70898	2955.64
												2.77078	2.71911	2964.33
												2.78106	2.72939	2972.86
												2.79104	2.73937	2980.4
												2.80087	2.7492	2986.23
												2.81077	2.7591	2990.25
												2.82038	2.76871	2992.52
												2.83082	2.77915	2989.09
												2.83164	2.77997	2984.83
												2.83223	2.78056	2979.02
												2.8326	2.78093	2971.85
												2.83281	2.78114	2964.13
												2.83295	2.78128	2956.57
												2.83303	2.78136	2949.36
												2.83308	2.78141	2942.41
												2.8331	2.78143	2935.68
												2.83312	2.78145	2929.15
												2.83312	2.78145	2922.67
												2.83312	2.78145	2912.63
												2.83312	2.78145	2864.28
												2.83312	2.78145	2742.47
												2.83311	2.78144	2612.8
												2.8331	2.78143	2483.77

## Sheet: ESIN 2
ESIN 2 (1000 N)				ESIN 2 (1500 N)				ESIN 2 (2000 N)				ESIN 2 (3000 N)				ESIN 2 (4000 N)				ESIN 2 (5000 N)				ESIN 2 (6000 N)				ESIN 2 (7000 N)
Standard travel	Displacement corrected	Standard force		Standard travel	Displacement corrected	Standard force		Standard travel	Displacement corrected	Standard force		Standard travel	Displacement corrected	Standard force		Standard travel	Displacement corrected	Standard force		Standard travel	Displacement corrected	Standard force		Standard travel	Displacement corrected	Standard force		Standard travel	Displacement corrected	Standard force
mm	mm	N		mm	mm	N		mm	mm	N		mm	mm	N		mm	mm	N		mm	mm	N		mm	mm	N		mm	mm	N
0	-0.0167417	131.694		0	-0.0175567	129.879		0	-0.0202552	126.847		0	-0.0218199	126.124		0	-0.0203153	127.741		0	-0.0198464	128.254		0	-0.0157125	131.661		0	-0.0150384	131.212
-1.63078e-06	-0.0167433	130.56		-5.69701e-06	-0.0175624	128.828		-7.4029e-06	-0.0202627	125.785		1.09434e-06	-0.0218188	125.084		3.11136e-07	-0.020315	126.688		2.09212e-06	-0.0198443	127.11		-8.44359e-06	-0.015721	130.579		-1.73807e-06	-0.0150402	130.182
-6.97374e-07	-0.0167424	129.483		-4.64559e-06	-0.0175614	127.727		-2.9397e-06	-0.0202582	124.653		4.29153e-07	-0.0218194	123.955		-7.29561e-07	-0.020316	125.556		-2.17795e-06	-0.0198486	126.079		-3.31521e-06	-0.0157158	129.578		-4.70996e-06	-0.0150431	129.127
-1.6737e-06	-0.0167434	128.323		-7.04884e-06	-0.0175638	126.699		-1.8239e-06	-0.0202571	123.587		-2.36034e-07	-0.0218201	122.907		1.18017e-07	-0.0203152	124.513		-5.04255e-06	-0.0198515	124.951		-2.56419e-06	-0.0157151	128.514		-1.68443e-06	-0.0150401	128.031
-1.99556e-06	-0.0167437	127.243		-6.23345e-06	-0.0175629	125.588		-1.46985e-06	-0.0202567	122.477		2.91824e-06	-0.021817	121.818		1.56641e-06	-0.0203137	123.409		-3.86238e-06	-0.0198503	123.93		-1.06001e-05	-0.0157231	127.413		-4.45247e-06	-0.0150429	126.927
4.57048e-06	-0.0167371	126.193		0.000209717	-0.017347	124.616		0.00183041	-0.0184248	122.933		3.18539e-05	-0.021788	120.772		0.000299667	-0.0200156	122.512		0.00169743	-0.018149	124.358		0.00223132	-0.0134812	128.59		0.00195472	-0.0130837	128.003
0.00252134	-0.0142204	127.994		0.0022306	-0.0153261	126.047		0.00327792	-0.0169773	124.479		0.00235038	-0.0194695	122.134		0.00254468	-0.0177706	124.121		0.00314078	-0.0167057	125.833		0.00380593	-0.0119066	130.654		0.0034471	-0.0115913	129.936
0.00338441	-0.0133573	129.048		0.00379321	-0.0137635	127.918		0.00414585	-0.0161094	125.557		0.00393703	-0.0178828	123.925		0.00417929	-0.016136	126.093		0.00398121	-0.0158652	126.89		0.00474365	-0.0109689	132.051		0.00433297	-0.0107054	131.285
0.00432509	-0.0124166	130.347		0.00472404	-0.0128327	129.197		0.00511276	-0.0151425	126.849		0.0048818	-0.0169381	125.139		0.00515366	-0.0151616	127.4		0.00493657	-0.0149099	128.174		0.0057852	-0.00992731	133.7		0.00532724	-0.00971117	132.896
0.00532663	-0.0114151	131.896		0.00575588	-0.0118008	130.709		0.00618288	-0.0140724	128.357		0.005927	-0.0158929	126.57		0.0062388	-0.0140765	128.929		0.00598636	-0.0138601	129.682		0.00691319	-0.00879932	135.588		0.00641498	-0.00862344	134.763
0.0064312	-0.0103105	133.686		0.0068765	-0.0106802	132.446		0.00733525	-0.01292	130.082		0.00706687	-0.014753	128.215		0.00739612	-0.0129192	130.665		0.0071254	-0.012721	131.407		0.00814874	-0.00756377	137.709		0.00759704	-0.00744138	136.883
0.00762203	-0.00911967	135.716		0.00810115	-0.00945556	134.405		0.00859233	-0.0116629	132		0.00830019	-0.0135197	130.072		0.00865466	-0.0116606	132.599		0.00836701	-0.0114794	133.335		0.00947296	-0.00623955	140.041		0.00888709	-0.00615133	139.235
0.00891571	-0.007826	137.954		0.00942884	-0.00812787	136.567		0.00995574	-0.0102995	134.089		0.00964652	-0.0121734	132.122		0.0100134	-0.0103019	134.712		0.00970983	-0.0101366	135.454		0.0108927	-0.0048198	142.558		0.0102882	-0.00475026	141.803
0.0102791	-0.00646261	140.367		0.0108529	-0.00670383	138.901		0.0114121	-0.00884317	136.335		0.0110883	-0.0107316	134.334		0.0114785	-0.00883683	136.983		0.0111475	-0.00869895	137.743		0.0123975	-0.00331496	145.24		0.0117763	-0.00326211	144.541
0.0117509	-0.00499079	142.931		0.0123786	-0.00517813	141.391		0.0129768	-0.00727843	138.726		0.0126292	-0.00919069	136.695		0.0130348	-0.0072805	139.396		0.0126791	-0.00716738	140.183		0.0139903	-0.00172218	148.073		0.0133498	-0.00168865	147.428
0.0133234	-0.00341831	145.637		0.0140092	-0.00354752	144.025		0.0146397	-0.00561558	141.254		0.0142781	-0.00754176	139.195		0.0146965	-0.00561882	141.944		0.0143149	-0.00553153	142.779		0.0157125	0	151.047		0.0150384	0	150.456
0.0149833	-0.00175845	148.498		0.0157346	-0.00182209	146.804		0.0163905	-0.00386478	143.924		0.0160127	-0.00580717	141.836		0.0164611	-0.00385416	144.615		0.0160348	-0.00381169	145.511		0.0175386	0.00182606	154.163		0.0168165	0.0017781	153.634
0.0167417	0	151.508		0.0175567	0	149.728		0.0182614	-0.00199384	146.737		0.0178616	-0.00395832	144.61		0.0183332	-0.00198208	147.413		0.017883	-0.00196344	148.38		0.0194588	0.00374625	157.423		0.0186649	0.00362651	156.959
0.0186149	0.00187325	154.674		0.0194765	0.00191983	152.803		0.0202552	0	149.679		0.0197844	-0.00203551	147.52		0.0203153	0	150.338		0.0198464	0	151.377		0.021488	0.00577545	160.827		0.0206111	0.00557269	160.438
0.0205934	0.00385174	157.992		0.0214747	0.00391803	156.036		0.0223385	0.00208322	152.762		0.0218199	0	150.561		0.0223595	0.00204423	153.39		0.0219163	0.00206983	154.499		0.0236226	0.00791008	164.389		0.0226633	0.00762493	164.075
0.0226888	0.00594705	161.464		0.0235806	0.00602392	159.429		0.0245227	0.00426742	155.97		0.0239605	0.00214063	153.744		0.0244948	0.00417947	156.583		0.024069	0.00422257	157.749		0.0258417	0.0101292	168.11		0.024837	0.00979858	167.87
0.0248767	0.00813501	165.087		0.0257941	0.00823735	162.968		0.026794	0.0065388	159.309		0.0261923	0.00437239	157.061		0.026741	0.00642566	159.911		0.026338	0.00649161	161.13		0.0281571	0.0124446	172		0.0271108	0.0120724	171.826
0.0271786	0.0104369	168.868		0.0281329	0.0105762	166.637		0.0291629	0.00890762	162.786		0.0285365	0.00671665	160.501		0.0290749	0.00875962	163.378		0.0286862	0.00883976	164.644		0.0305592	0.0148467	176.07		0.0294917	0.0144532	175.933
0.0295506	0.0128089	172.816		0.0306002	0.0130435	170.447		0.0316246	0.0113693	166.399		0.0309887	0.00916879	164.065		0.031523	0.0112077	166.969		0.0311225	0.011276	168.283		0.0330806	0.0173681	180.311		0.0319929	0.0169545	180.202
0.032012	0.0152703	176.925		0.0331775	0.0156207	174.39		0.0341617	0.0139064	170.142		0.0335729	0.011753	167.752		0.0340885	0.0137732	170.683		0.0336399	0.0137934	172.057		0.0357097	0.0199972	184.71		0.0345746	0.0195361	184.642
0.034561	0.0178193	181.196		0.0358198	0.0182631	178.465		0.0368012	0.016546	174.007		0.0362536	0.0144337	171.563		0.0367703	0.016455	174.518		0.0362466	0.0164002	175.952		0.0384443	0.0227318	189.255		0.0372424	0.022204	189.257
0.0372382	0.0204965	185.618		0.0385105	0.0209538	182.672		0.0395608	0.0193056	177.993		0.0390084	0.0171885	175.49		0.0395273	0.019212	178.483		0.038968	0.0191215	179.979		0.041318	0.0256055	193.934		0.0400003	0.0249619	194.03
0.0400679	0.0233262	190.182		0.0412912	0.0237345	187.009		0.0424433	0.022188	182.1		0.0418395	0.0200197	179.556		0.0423758	0.0220605	182.598		0.0418195	0.021973	184.137		0.0443174	0.0286049	198.754		0.0428574	0.027819	198.956
0.0430132	0.0262715	194.885		0.0441862	0.0266295	191.472		0.0454131	0.0251578	186.339		0.0447711	0.0229513	183.76		0.0453266	0.0250113	186.866		0.0447621	0.0249156	188.444		0.0473642	0.0316517	203.718		0.0458372	0.0307987	204.014
0.0460351	0.0292934	199.752		0.0471841	0.0296274	196.049		0.0484635	0.0282082	190.713		0.0477968	0.0259769	188.091		0.0483589	0.0280436	191.29		0.047789	0.0279426	192.925		0.0504678	0.0347553	208.812		0.0489671	0.0339287	209.201
0.0491391	0.0323974	204.802		0.0502871	0.0327304	200.741		0.0516061	0.0313508	195.235		0.0509242	0.0291043	192.551		0.0514957	0.0311804	195.856		0.0508915	0.0310451	197.574		0.0536478	0.0379353	214.036		0.0521979	0.0371595	214.525
0.0522875	0.0355458	210.032		0.053506	0.0359493	205.572		0.0548597	0.0346044	199.89		0.0541786	0.0323588	197.144		0.0547724	0.0344572	200.558		0.0540999	0.0342535	202.383		0.0569361	0.0412236	219.377		0.0555098	0.0404714	219.992
0.0555189	0.0387772	215.42		0.0568038	0.0392471	210.561		0.0582428	0.0379876	204.667		0.057553	0.0357331	201.88		0.058174	0.0378587	205.4		0.0574446	0.0375982	207.325		0.0603337	0.0446212	224.831		0.0588805	0.043842	225.611
0.0588724	0.0421307	220.943		0.0602011	0.0426444	215.7		0.0617624	0.0415071	209.573		0.0610159	0.039196	206.758		0.0616648	0.0413495	210.4		0.0609428	0.0410964	212.412		0.0638421	0.0481295	230.422		0.0623309	0.0472925	231.376
0.0623654	0.0456237	226.612		0.0636908	0.0461341	220.981		0.0653778	0.0451225	214.618		0.0645703	0.0427504	211.779		0.065209	0.0448937	215.554		0.0645555	0.044709	217.632		0.0674272	0.0517147	236.167		0.0659117	0.0508733	237.281
0.065975	0.0492333	232.426		0.0673038	0.0497471	226.426		0.0690039	0.0487486	219.816		0.0682444	0.0464245	216.946		0.0688083	0.048493	220.862		0.0682255	0.048379	223		0.0710702	0.0553576	242.067		0.0695918	0.0545534	243.336
0.0696389	0.0528972	238.399		0.0710488	0.053492	232.043		0.0726966	0.0524414	225.164		0.0720445	0.0502246	222.273		0.0725358	0.0522205	226.332		0.0719439	0.0520974	228.51		0.0748273	0.0591148	248.131		0.0733928	0.0583544	249.564
0.0733696	0.0566279	244.533		0.0748752	0.0573185	237.839		0.0765023	0.056247	230.651		0.0759168	0.0540969	227.769		0.0764064	0.0560911	231.965		0.0757404	0.055894	234.153		0.0787382	0.0630257	254.357		0.0772762	0.0622378	255.961
0.0771994	0.0604577	250.82		0.0787477	0.061191	243.82		0.0804422	0.0601869	236.297		0.0798118	0.0579919	233.43		0.0803944	0.0600791	237.756		0.0796636	0.0598171	239.934		0.0827936	0.0670811	260.776		0.0812446	0.0662062	262.535
0.0811995	0.0644578	257.268		0.082742	0.0651853	250		0.0844925	0.0642373	242.122		0.0837997	0.0619798	239.243		0.0844435	0.0641282	243.683		0.0836972	0.0638507	245.848		0.0869178	0.0712053	267.415		0.0853547	0.0703163	269.284
0.0853121	0.0685704	263.876		0.0869049	0.0693482	256.366		0.0886155	0.0683603	248.13		0.0879026	0.0660827	245.21		0.0885877	0.0682724	249.755		0.0877978	0.0679514	251.878		0.0910836	0.0753711	274.253		0.0896218	0.0745834	276.229
0.0894986	0.0727569	270.628		0.0911936	0.0736369	262.904		0.0927892	0.0725339	254.322		0.0921558	0.070336	251.346		0.0929141	0.0725988	255.982		0.0919682	0.0721217	258.045		0.0953585	0.079646	281.292		0.0939473	0.0789089	283.374
0.0937533	0.0770116	277.511		0.0955677	0.078011	269.609		0.0970794	0.0768241	260.713		0.0965013	0.0746814	257.641		0.0973671	0.0770518	262.363		0.0962727	0.0764263	264.385		0.0998114	0.0840989	288.528		0.098305	0.0832666	290.699
0.0981412	0.0813995	284.54		0.100006	0.0824492	276.48		0.101543	0.0812873	267.303		0.100866	0.0790459	264.097		0.101829	0.0815138	268.901		0.100736	0.0808896	270.923		0.104407	0.0886948	295.941		0.102736	0.0876979	298.187
0.102724	0.085982	291.74		0.104506	0.0869489	283.53		0.106127	0.085872	274.073		0.105319	0.0834992	270.735		0.106344	0.0860287	275.594		0.105266	0.0854194	277.698		0.109038	0.0933259	303.515		0.107308	0.0922693	305.854
0.107367	0.0906254	299.106		0.109134	0.0915774	290.759		0.110769	0.0905141	281.003		0.109951	0.088131	277.58		0.110977	0.0906616	282.47		0.10985	0.0900036	284.67		0.113718	0.0980053	311.274		0.112007	0.0969683	313.693
0.111984	0.0952424	306.635		0.11388	0.0963232	298.165		0.115548	0.0952923	288.104		0.114685	0.0928653	284.613		0.115736	0.095421	289.531		0.114587	0.094741	291.816		0.118551	0.102839	319.239		0.116757	0.101719	321.678
0.116691	0.0999498	314.367		0.118663	0.101106	305.721		0.120477	0.100222	295.42		0.119473	0.0976527	291.79		0.120583	0.100268	296.761		0.119501	0.0996548	299.145		0.123512	0.107799	327.401		0.121539	0.106501	329.841
0.121572	0.10483	322.314		0.123565	0.106008	313.413		0.125493	0.105238	302.926		0.124384	0.102564	299.107		0.125501	0.105186	304.16		0.124552	0.104706	306.651		0.128511	0.112798	335.702		0.126478	0.11144	338.224
0.126543	0.109802	330.396		0.12865	0.111094	321.26		0.130543	0.110288	310.593		0.129486	0.107666	306.624		0.130522	0.110207	311.769		0.129651	0.109804	314.317		0.133649	0.117937	344.144		0.131532	0.116494	346.811
0.131557	0.114816	338.579		0.133844	0.116287	329.275		0.135676	0.115421	318.415		0.134713	0.112893	314.347		0.135704	0.115389	319.575		0.134752	0.114905	322.181		0.13896	0.123248	352.759		0.136669	0.121631	355.571
0.13678	0.120038	346.906		0.139008	0.121452	337.454		0.140992	0.120737	326.406		0.13993	0.11811	322.281		0.140974	0.120658	327.547		0.139957	0.120111	330.254		0.144346	0.128634	361.542		0.141918	0.126879	364.48
0.142197	0.125456	355.406		0.144227	0.12667	345.831		0.146436	0.12618	334.555		0.145196	0.123376	330.469		0.146304	0.125989	335.669		0.145285	0.125438	338.492		0.149723	0.13401	370.478		0.147359	0.132321	373.581
0.147564	0.130823	364.081		0.149622	0.132065	354.448		0.151958	0.131702	342.885		0.150633	0.128813	338.882		0.151812	0.131497	343.974		0.150725	0.130878	346.853		0.155225	0.139512	379.607		0.152924	0.137886	382.923
0.152926	0.136184	372.915		0.155097	0.13754	363.294		0.157598	0.137343	351.43		0.156175	0.134355	347.475		0.157487	0.137172	352.479		0.156339	0.136492	355.341		0.160893	0.14518	388.961		0.158487	0.143448	392.523
0.158461	0.141719	381.901		0.160603	0.143046	372.344		0.163273	0.143018	360.171		0.161833	0.140013	356.222		0.163115	0.1428	361.169		0.162089	0.142243	363.991		0.166602	0.150889	398.516		0.164122	0.149083	402.368
0.16411	0.147369	391.022		0.166237	0.148681	381.596		0.168943	0.148688	369.099		0.167714	0.145894	365.147		0.168781	0.148466	370.052		0.167827	0.147981	372.839		0.172308	0.156596	408.254		0.169873	0.154835	412.423
0.169837	0.153096	400.278		0.172075	0.154519	391.046		0.174748	0.154493	378.2		0.173691	0.151871	374.27		0.174615	0.1543	379.11		0.173575	0.153729	381.909		0.178161	0.162448	418.187		0.175728	0.16069	422.647
0.17572	0.158978	409.701		0.178021	0.160465	400.702		0.180743	0.160488	387.482		0.179615	0.157796	383.613		0.180584	0.160268	388.356		0.179464	0.159618	391.204		0.184184	0.168472	428.305		0.181787	0.166749	433.027
0.181735	0.164993	419.321		0.184068	0.166512	410.57		0.186737	0.166482	396.971		0.185593	0.163774	393.14		0.186707	0.166392	397.799		0.185448	0.165602	400.714		0.190294	0.174582	438.602		0.188046	0.173007	443.587
0.187765	0.171024	429.135		0.190261	0.172705	420.664		0.192775	0.17252	406.693		0.191695	0.169875	402.828		0.192945	0.17263	407.426		0.191489	0.171643	410.414		0.196537	0.180825	449.105		0.194285	0.179246	454.337
0.193943	0.177201	438.976		0.196513	0.178957	430.98		0.198981	0.178726	416.615		0.197868	0.176048	412.693		0.199211	0.178896	417.259		0.197716	0.177869	420.291		0.202896	0.187184	459.847		0.200501	0.185462	465.302
0.200328	0.183586	448.671		0.202807	0.18525	441.482		0.205293	0.185038	426.747		0.204151	0.182331	422.74		0.205502	0.185187	427.315		0.204086	0.184239	430.373		0.209245	0.193532	470.849		0.206837	0.191798	476.441
0.206767	0.190026	458.481		0.20928	0.191723	452.129		0.211743	0.191488	437.094		0.21058	0.18876	432.99		0.211943	0.191627	437.565		0.210563	0.190716	440.704		0.215652	0.199939	482.076		0.213265	0.198226	487.771
0.213269	0.196527	468.436		0.215914	0.198357	462.979		0.218407	0.198151	447.67		0.217031	0.195211	443.464		0.218472	0.198156	448.023		0.21714	0.197294	451.277		0.222222	0.206509	493.517		0.219773	0.204734	499.298
0.21988	0.203138	478.528		0.222652	0.205095	474.037		0.225068	0.204813	458.536		0.223634	0.201815	454.163		0.225064	0.204749	458.723		0.223776	0.203929	462.087		0.228984	0.213271	505.201		0.22645	0.211412	511.017
0.226559	0.209817	488.788		0.229423	0.211866	485.266		0.231774	0.211518	469.659		0.230411	0.208591	465.089		0.23179	0.211475	469.595		0.230475	0.210628	473.123		0.235917	0.220205	517.087		0.233167	0.218129	522.964
0.233364	0.216622	499.17		0.236173	0.218616	496.687		0.238618	0.218363	480.978		0.237258	0.215438	476.267		0.2386	0.218284	480.66		0.237327	0.217481	484.345		0.242915	0.227203	529.159		0.239986	0.224948	535.148
0.240243	0.223501	509.653		0.243032	0.225475	508.33		0.245597	0.225342	492.519		0.244193	0.222374	487.662		0.245563	0.225248	491.943		0.24434	0.224493	495.793		0.24991	0.234197	541.472		0.247004	0.231965	547.576
0.24717	0.230428	520.275		0.250051	0.232494	520.19		0.252845	0.23259	504.263		0.251236	0.229417	499.267		0.252767	0.232452	503.465		0.251453	0.231607	507.468		0.257056	0.241344	554.045		0.254099	0.239061	560.26
0.254188	0.237446	531.057		0.25706	0.239503	532.278		0.260143	0.239888	516.189		0.258398	0.236578	511.102		0.259951	0.239635	515.247		0.258641	0.238795	519.329		0.264253	0.248541	566.866		0.261265	0.246227	573.172
0.261283	0.244541	542.125		0.264159	0.246603	544.573		0.267342	0.247086	528.331		0.265753	0.243934	523.152		0.267122	0.246807	527.236		0.265767	0.245921	531.395		0.271525	0.255813	579.883		0.268516	0.253477	586.311
0.268444	0.251703	553.657		0.271402	0.253845	557.1		0.274613	0.254357	540.71		0.273117	0.251297	535.438		0.274423	0.254108	539.44		0.273047	0.2532	543.703		0.278933	0.26322	593.077		0.275899	0.260861	599.718
0.275773	0.259031	565.352		0.27881	0.261253	569.914		0.282005	0.26175	553.361		0.280527	0.258707	547.979		0.281933	0.261618	551.879		0.280474	0.260627	556.28		0.286475	0.270762	606.502		0.28349	0.268451	613.393
0.283237	0.266496	577.19		0.286432	0.268875	583.01		0.289524	0.269269	566.25		0.288019	0.266199	560.787		0.28967	0.269355	564.54		0.287889	0.268043	569.083		0.294212	0.278499	620.203		0.291097	0.276059	627.328
0.290868	0.274126	589.207		0.294062	0.276506	596.372		0.297129	0.276874	579.315		0.295573	0.273753	573.827		0.29731	0.276994	577.399		0.295423	0.275577	582.081		0.30197	0.286257	634.134		0.298733	0.283694	641.527
0.298658	0.281916	601.395		0.301733	0.284176	609.963		0.30481	0.284555	592.586		0.303306	0.281486	587.067		0.304969	0.284654	590.53		0.30309	0.283244	595.341		0.309705	0.293993	648.257		0.306465	0.291426	655.98
0.306478	0.289736	613.734		0.309539	0.291982	623.807		0.312688	0.292433	606.145		0.311194	0.289374	600.511		0.312778	0.292463	604.012		0.311042	0.291195	608.959		0.317541	0.301829	662.602		0.31431	0.299271	670.655
0.314357	0.297615	626.215		0.317599	0.300042	637.893		0.320696	0.300441	619.987		0.31923	0.29741	614.223		0.320667	0.300352	617.818		0.319142	0.299296	622.883		0.32562	0.309907	677.183		0.322324	0.307286	685.544
0.322448	0.305706	638.826		0.325831	0.308274	652.193		0.328772	0.308517	634.08		0.327332	0.305512	628.233		0.328688	0.308373	631.846		0.327137	0.30729	637.037		0.333886	0.318173	691.995		0.330475	0.315437	700.669
0.330721	0.313979	651.536		0.333924	0.316368	666.682		0.33689	0.316634	648.421		0.335396	0.313576	642.536		0.336777	0.316462	646.074		0.335202	0.315356	651.458		0.342011	0.326299	707.005		0.338727	0.323689	716.081
0.338954	0.322212	664.364		0.342025	0.324468	681.446		0.345182	0.324927	663.039		0.343553	0.321733	657.154		0.345108	0.324793	660.639		0.343588	0.323742	666.166		0.350185	0.334472	722.324		0.346984	0.331945	731.786
0.347127	0.330386	677.347		0.350254	0.332697	696.524		0.353637	0.333382	677.963		0.351917	0.330097	672.023		0.353631	0.333316	675.544		0.352229	0.332383	681.153		0.358508	0.342795	738.022		0.355289	0.34025	747.79
0.355426	0.338684	690.547		0.358654	0.341097	711.834		0.362127	0.341872	693.15		0.360453	0.338633	687.078		0.362169	0.341854	690.729		0.360693	0.340847	696.352		0.367024	0.351311	754.027		0.363752	0.348713	764.073
0.363758	0.347016	703.888		0.367092	0.349535	727.308		0.370636	0.350381	708.603		0.368963	0.347143	702.338		0.370658	0.350343	706.171		0.369087	0.349241	711.845		0.375613	0.3599	770.238		0.372406	0.357368	780.518
0.372221	0.35548	717.364		0.375637	0.358081	743.015		0.379196	0.35894	724.298		0.377572	0.355752	717.904		0.37935	0.359035	721.93		0.37758	0.357734	727.743		0.384333	0.368621	786.708		0.381149	0.366111	797.12
0.380828	0.364086	731.044		0.384397	0.36684	759.055		0.38792	0.367664	740.245		0.386339	0.364519	733.821		0.388267	0.367951	738.052		0.386266	0.36642	743.951		0.393305	0.377592	803.55		0.389891	0.374853	813.974
0.389685	0.372943	744.946		0.393263	0.375707	775.375		0.39685	0.376595	756.442		0.395076	0.373256	750.034		0.397109	0.376794	754.441		0.395022	0.375176	760.365		0.402399	0.386687	820.735		0.398787	0.383749	831.214
0.398589	0.381847	758.971		0.402141	0.384584	791.933		0.405951	0.385696	772.925		0.403899	0.382079	766.543		0.405886	0.385571	771.068		0.403864	0.384018	777.033		0.41144	0.395728	838.234		0.407708	0.39267	848.776
0.407501	0.39076	773.083		0.411182	0.393625	808.779		0.415024	0.394769	789.734		0.412931	0.391111	783.424		0.414764	0.394448	787.984		0.412964	0.393118	794.069		0.420566	0.404853	856.095		0.416642	0.401604	866.617
0.416643	0.399901	787.314		0.420439	0.402882	825.943		0.42407	0.403815	806.913		0.422224	0.400404	800.626		0.423917	0.403601	805.268		0.422205	0.402359	811.478		0.429808	0.414095	874.419		0.425715	0.410677	884.823
0.426071	0.40933	801.637		0.429712	0.412156	843.301		0.433291	0.413036	824.407		0.431446	0.409626	818.026		0.433304	0.412989	822.886		0.431415	0.411569	829.219		0.439043	0.423331	893.14		0.435128	0.42009	903.406
0.43545	0.418708	816.003		0.438927	0.42137	860.725		0.442744	0.422488	842.119		0.440679	0.418859	835.664		0.442721	0.422406	840.826		0.440789	0.420942	847.306		0.44827	0.432558	912.168		0.444595	0.429556	922.226
0.444722	0.42798	830.456		0.448206	0.43065	878.254		0.452234	0.431979	860.045		0.450235	0.428415	853.654		0.452105	0.431789	859.152		0.450357	0.430511	865.799		0.457569	0.441857	931.528		0.453961	0.438922	941.274
0.454098	0.437356	845.027		0.457723	0.440166	896.107		0.461771	0.441515	878.277		0.459981	0.438161	871.993		0.461633	0.441318	877.87		0.459968	0.440121	884.639		0.467127	0.451414	951.346		0.463513	0.448475	960.684
0.463621	0.446879	859.609		0.467288	0.449731	914.308		0.471407	0.451152	896.831		0.469509	0.447689	890.674		0.471412	0.451097	896.832		0.469549	0.449703	903.693		0.476938	0.461226	971.622		0.473427	0.458388	980.466
0.473159	0.456418	874.098		0.476761	0.459205	932.774		0.481058	0.460803	915.7		0.479063	0.457244	909.717		0.481252	0.460937	915.961		0.479135	0.459289	922.974		0.48684	0.471128	992.279		0.483211	0.468173	1000.59
0.482917	0.466175	888.554		0.486191	0.468635	951.523		0.490775	0.470519	934.906		0.488821	0.467001	929.067		0.491039	0.470723	935.349		0.488929	0.469083	942.556		0.496734	0.481021	1013.32		0.492916	0.477878	1021.03
0.492905	0.476164	903.022		0.496058	0.478501	970.531		0.50077	0.480515	954.395		0.498708	0.476888	948.625		0.500937	0.480622	955.018		0.498923	0.479077	962.427		0.506773	0.491061	1034.67		0.502744	0.487706	1041.77
0.502831	0.486089	917.454		0.506397	0.488841	989.655		0.510838	0.490583	974.031		0.508659	0.486839	968.347		0.51077	0.490455	974.925		0.508852	0.489006	982.559		0.516993	0.50128	1056.2		0.512695	0.497657	1062.71
0.512705	0.495963	931.869		0.51663	0.499073	1008.85		0.52074	0.500485	993.769		0.518808	0.496988	988.254		0.520552	0.500237	995.083		0.518648	0.498801	1002.98		0.527097	0.511384	1077.87		0.522617	0.507579	1083.8
0.522797	0.506055	946.364		0.52666	0.509104	1028.25		0.53073	0.510474	1013.65		0.528945	0.507125	1008.38		0.530522	0.510207	1015.5		0.528591	0.508745	1023.6		0.537085	0.521372	1099.74		0.532731	0.517693	1105.01
0.532907	0.516165	960.655		0.536731	0.519174	1047.89		0.540941	0.520686	1033.75		0.53889	0.51707	1028.72		0.540701	0.520386	1036.05		0.538684	0.518838	1044.34		0.547026	0.531313	1121.79		0.542894	0.527855	1126.39
0.542821	0.526079	973.496		0.546658	0.529101	1067.69		0.550937	0.530682	1054.09		0.548957	0.527137	1049.28		0.550684	0.530369	1056.64		0.548713	0.528866	1065.2		0.556791	0.541079	1144.01		0.552833	0.537794	1147.88
0.55266	0.535918	984.142		0.556517	0.53896	1087.52		0.560782	0.540526	1074.62		0.559027	0.537207	1070.03		0.56067	0.540354	1077.29		0.558785	0.538939	1086.21		0.566589	0.550877	1166.42		0.562868	0.54783	1169.53
0.562735	0.545994	992.663		0.5666	0.549043	1107.27		0.570661	0.550405	1095.31		0.568903	0.547083	1090.83		0.570967	0.550651	1098.08		0.568832	0.548985	1107.38		0.576639	0.560927	1188.97		0.57298	0.557941	1191.33
0.57233	0.555589	999.201		0.576776	0.559219	1126.86		0.580594	0.560339	1116.1		0.578675	0.556855	1111.65		0.58113	0.560814	1119.02		0.578745	0.558899	1128.77		0.586718	0.571005	1211.58		0.582947	0.567908	1213.2
0.578132	0.561391	1003.72		0.586706	0.569149	1146.26		0.590579	0.570324	1136.96		0.588638	0.566818	1132.61		0.590993	0.570677	1140.11		0.588733	0.568887	1150.4		0.596631	0.580919	1234.23		0.592741	0.577703	1235.02
0.580024	0.563282	1006.25		0.596694	0.579137	1165.57		0.600726	0.58047	1157.87		0.598761	0.576941	1153.78		0.600796	0.580481	1161.35		0.598899	0.579052	1172.15		0.606705	0.590992	1257		0.60262	0.587581	1256.89
0.582328	0.565586	1002.46		0.60696	0.589403	1184.86		0.610869	0.590614	1178.9		0.608798	0.586978	1175.06		0.610737	0.590422	1182.7		0.608883	0.589036	1193.9		0.61701	0.601298	1279.93		0.612711	0.597673	1278.94
0.582655	0.565914	997.61		0.616943	0.599386	1204.18		0.620856	0.600601	1200.06		0.618718	0.596898	1196.5		0.620619	0.600304	1204.08		0.618746	0.598899	1215.66		0.627064	0.611352	1302.99		0.622823	0.607784	1301.09
0.582837	0.566096	992.301		0.626711	0.609154	1223.51		0.630911	0.610656	1221.4		0.628743	0.606924	1218.08		0.630603	0.610287	1225.47		0.628868	0.609022	1237.56		0.636907	0.621194	1326.21		0.632775	0.617737	1323.33
0.582954	0.566212	987.295		0.636603	0.619046	1242.82		0.64098	0.620725	1242.88		0.638903	0.617084	1239.72		0.640716	0.6204	1246.96		0.639033	0.619186	1259.67		0.646777	0.631065	1349.57		0.642729	0.627691	1345.71
0.583033	0.566291	982.633		0.646575	0.629018	1261.91		0.650902	0.630647	1264.37		0.64893	0.62711	1261.37		0.650767	0.630452	1268.59		0.648866	0.629019	1281.99		0.656692	0.64098	1373.02		0.652865	0.637827	1368.17
0.583068	0.566326	978.196		0.656543	0.638986	1280.39		0.660691	0.640436	1285.78		0.658852	0.637032	1283.14		0.660801	0.640485	1290.37		0.658635	0.638789	1304.5		0.666565	0.650853	1396.52		0.662961	0.647923	1390.61
0.583091	0.566349	973.98		0.666667	0.649111	1298.75		0.67063	0.650375	1307.18		0.668783	0.646963	1305.04		0.670919	0.650604	1312.32		0.668595	0.648749	1327.18		0.676602	0.660889	1420.03		0.672878	0.657839	1413.12
0.583102	0.566361	969.993		0.676846	0.659289	1317.12		0.680729	0.660474	1328.59		0.678604	0.656784	1327.05		0.680995	0.660679	1334.39		0.678578	0.658731	1349.92		0.686695	0.670983	1443.64		0.68283	0.667792	1435.76
0.583098	0.566356	966.22		0.686883	0.669327	1335.51		0.690786	0.67053	1349.96		0.688486	0.666666	1349.22		0.690902	0.670587	1356.42		0.688657	0.66881	1372.66		0.696675	0.680962	1467.38		0.692698	0.677659	1458.53
0.583103	0.566361	962.646		0.696927	0.67937	1353.92		0.700717	0.680462	1371.33		0.698581	0.676762	1371.53		0.700764	0.680449	1378.44		0.698832	0.678986	1395.47		0.706741	0.691029	1491.35		0.702528	0.68749	1481.48
0.583098	0.566356	959.257		0.706972	0.689415	1372.31		0.710606	0.690351	1392.81		0.708716	0.686897	1393.89		0.710775	0.69046	1400.59		0.708946	0.6891	1418.43		0.716832	0.701119	1515.55		0.712476	0.697438	1504.62
0.5831	0.566358	956.029		0.716895	0.699338	1390.57		0.720476	0.70022	1414.4		0.718668	0.696848	1416.23		0.720822	0.700506	1422.91		0.718955	0.699108	1441.56		0.726776	0.711063	1539.85		0.722638	0.7076	1527.83
0.58309	0.566349	952.952		0.726728	0.709171	1408.61		0.730307	0.710051	1436		0.728731	0.706912	1438.63		0.730724	0.710409	1445.39		0.728966	0.709119	1464.88		0.736643	0.72093	1564.06		0.732646	0.717608	1550.99
0.583089	0.566347	950.012		0.736646	0.719089	1426.54		0.740035	0.719779	1457.63		0.739051	0.717231	1461.13		0.740532	0.720217	1468.03		0.738892	0.719045	1488.35		0.746637	0.730924	1588.29		0.742672	0.727634	1574.17
				0.74673	0.729174	1444.5		0.749941	0.729685	1479.32		0.749114	0.727294	1483.76		0.750533	0.730217	1490.76		0.748707	0.72886	1511.84		0.756815	0.741103	1612.63		0.753002	0.737964	1597.47
				0.756814	0.739257	1461.79		0.760058	0.739802	1501.04		0.75895	0.73713	1506.51		0.760652	0.740337	1513.53		0.758481	0.738634	1535.32		0.766918	0.751205	1637.05		0.763155	0.748116	1620.93
				0.766775	0.749218	1476.74		0.770191	0.749936	1522.9		0.768789	0.746969	1529.36		0.770703	0.750387	1536.38		0.768428	0.748581	1558.95		0.776808	0.761095	1661.59		0.772986	0.757947	1644.55
				0.776728	0.759171	1489.1		0.780339	0.760083	1544.89		0.778679	0.756859	1552.26		0.780824	0.760509	1559.4		0.77853	0.758684	1582.76		0.78673	0.771017	1686.29		0.782768	0.76773	1668.3
				0.786642	0.769086	1498.97		0.790541	0.770286	1566.85		0.788576	0.766756	1575.13		0.790827	0.770512	1582.58		0.788635	0.768789	1606.7		0.796813	0.7811	1710.99		0.792679	0.777641	1692.12
				0.793914	0.776357	1506.34		0.800582	0.780327	1588.74		0.798647	0.776827	1597.98		0.800723	0.780408	1605.94		0.798631	0.778784	1630.77		0.806848	0.791136	1735.59		0.802542	0.787504	1715.93
				0.796744	0.779188	1511.24		0.81067	0.790414	1610.51		0.808771	0.786952	1620.9		0.810743	0.790427	1629.5		0.808728	0.788882	1654.9		0.816828	0.801116	1760.18		0.812599	0.79756	1739.72
				0.797737	0.78018	1513.74		0.820979	0.800723	1632.09		0.818773	0.796953	1643.9		0.820914	0.800598	1653.11		0.819003	0.799157	1679.03		0.826876	0.811163	1784.88		0.822739	0.807701	1763.54
				0.799182	0.781625	1511.68		0.831016	0.810761	1653.51		0.828834	0.807014	1667.03		0.830873	0.810558	1676.64		0.829091	0.809245	1703.14		0.836806	0.821094	1809.72		0.832763	0.817725	1787.48
				0.799583	0.782026	1507.21		0.840881	0.820626	1674.65		0.838945	0.817125	1690.29		0.840745	0.820429	1700.14		0.839042	0.819195	1727.33		0.846646	0.830933	1834.72		0.842816	0.827778	1811.58
				0.7998	0.782243	1501.54		0.850784	0.830529	1695.25		0.84897	0.82715	1713.59		0.850883	0.830568	1723.76		0.848943	0.829096	1751.58		0.856652	0.84094	1859.9		0.852971	0.837932	1835.84
				0.799938	0.782381	1495.87		0.860708	0.840453	1715.74		0.858841	0.837021	1736.76		0.860992	0.840677	1747.55		0.858734	0.838887	1775.93		0.866784	0.851071	1885.07		0.863001	0.847963	1860.14
				0.800018	0.782462	1490.48		0.870556	0.850301	1736.06		0.868735	0.846915	1759.85		0.870832	0.850517	1771.51		0.868574	0.848728	1800.39		0.876722	0.86101	1910.16		0.872856	0.857818	1884.33
				0.800062	0.782505	1485.3		0.88062	0.860364	1756.23		0.878748	0.856928	1782.91		0.88063	0.860314	1795.61		0.878673	0.858826	1824.9		0.886676	0.870963	1935.25		0.882733	0.867694	1908.47
				0.800088	0.782532	1480.28		0.890766	0.870511	1776.33		0.88878	0.86696	1805.92		0.890602	0.870286	1819.8		0.888726	0.868879	1849.42		0.896912	0.8812	1960.49		0.892763	0.877725	1932.71
				0.800098	0.782541	1475.47		0.900771	0.880516	1796.31		0.898673	0.876853	1828.89		0.90059	0.880275	1844		0.898654	0.878807	1873.96		0.906955	0.891242	1985.95		0.902803	0.887764	1957.06
				0.800106	0.782549	1470.85		0.910847	0.890591	1816.25		0.908533	0.886713	1851.84		0.910679	0.890363	1868.16		0.908769	0.888922	1898.61		0.916785	0.901073	2011.58		0.912692	0.897653	1981.49
				0.800108	0.782552	1466.42		0.920993	0.900738	1836.19		0.918422	0.896602	1874.83		0.920875	0.90056	1892.36		0.919024	0.899178	1923.37		0.926621	0.910909	2037.36		0.922529	0.907491	2006.07
				0.800106	0.782549	1462.18		0.930974	0.910718	1856.04		0.9283	0.90648	1897.89		0.930956	0.910641	1916.71		0.929015	0.909168	1948.24		0.9366	0.920888	2063.24		0.932575	0.917537	2030.71
				0.800101	0.782545	1458.11		0.94078	0.920524	1875.84		0.938133	0.916313	1921.1		0.940963	0.920648	1941.25		0.938887	0.919041	1973.25		0.946565	0.930852	2089.17		0.94272	0.927682	2055.35
				0.800094	0.782537	1454.19		0.950678	0.930423	1895.95		0.948036	0.926216	1944.4		0.950928	0.930613	1965.95		0.948818	0.928971	1998.37		0.956653	0.94094	2115.13		0.952762	0.937724	2080.02
				0.800089	0.782533	1450.43		0.960734	0.940479	1916.01		0.957949	0.93613	1967.78		0.960824	0.940509	1990.8		0.958682	0.938836	2023.54		0.966799	0.951086	2141.25		0.962838	0.947799	2104.82
				0.800085	0.782528	1446.79		0.970776	0.950521	1935.94		0.968082	0.946263	1991.35		0.970657	0.950342	2015.64		0.968552	0.948705	2048.72		0.976824	0.961111	2167.53		0.972804	0.957765	2129.76
				0.80008	0.782523	1443.29		0.980675	0.960419	1954.9		0.978447	0.956627	2015.13		0.980485	0.96017	2040.49		0.978644	0.958797	2073.93		0.986877	0.971164	2193.99		0.982706	0.967668	2154.83
				0.800074	0.782517	1439.9		0.990577	0.970322	1971.6		0.988752	0.966932	2038.95		0.990452	0.970136	2065.5		0.988733	0.968887	2099.23		0.996934	0.981221	2220.64		0.99274	0.977702	2180.04
				0.800071	0.782514	1436.61		1.00065	0.980395	1985.56		0.998679	0.976859	2062.7		1.00055	0.980236	2090.74		0.998669	0.978823	2124.64		1.00692	0.991207	2247.38		1.00292	0.98788	2205.23
				0.800063	0.782506	1433.42		1.01066	0.990403	1996.77		1.00862	0.986805	2086.44		1.01066	0.990344	2116.12		1.00873	0.988884	2150.28		1.01678	1.00106	2274.07		1.01288	0.997841	2230.32
				0.800055	0.782498	1430.33		1.01866	0.998409	2005.28		1.01889	0.997074	2110.15		1.02065	1.00034	2141.63		1.0188	0.998955	2176.16		1.02665	1.01094	2300.78		1.02274	1.0077	2255.39
				0.800057	0.7825	1427.33		1.02233	1.00208	2011.15		1.02894	1.00712	2133.8		1.0308	1.01048	2167.2		1.02876	1.00891	2202.07		1.03669	1.02097	2327.66		1.03289	1.01785	2280.57
				0.800049	0.782492	1424.41		1.02353	1.00327	2014.44		1.03874	1.01692	2157.38		1.04103	1.02072	2192.77		1.03865	1.0188	2227.9		1.0468	1.03109	2354.66		1.04294	1.0279	2305.89
								1.02504	1.00479	2013.26		1.04858	1.02676	2180.94		1.05107	1.03075	2218.36		1.04868	1.02883	2253.81		1.05679	1.04107	2381.73		1.05275	1.03772	2331.33
								1.0255	1.00524	2008.83		1.05857	1.03675	2204.43		1.06101	1.0407	2244.03		1.05884	1.03899	2279.86		1.06671	1.051	2408.89		1.06257	1.04754	2356.87
								1.02575	1.00549	2002.74		1.06855	1.04673	2227.27		1.07087	1.05055	2269.79		1.0689	1.04905	2306		1.07682	1.0611	2436.08		1.0726	1.05756	2382.48
								1.02589	1.00564	1996.39		1.07867	1.05685	2249.6		1.08069	1.06037	2295.67		1.07878	1.05893	2332.33		1.08694	1.07123	2463.27		1.08262	1.06758	2408.03
								1.02599	1.00574	1990.32		1.08889	1.06707	2271.89		1.09058	1.07026	2321.68		1.08875	1.0689	2358.8		1.09688	1.08116	2490.52		1.09269	1.07765	2433.51
								1.02605	1.0058	1984.48		1.09897	1.07716	2294.21		1.10068	1.08036	2347.71		1.09884	1.07899	2385.28		1.10678	1.09107	2517.84		1.10287	1.08783	2459.02
								1.02608	1.00583	1978.83		1.10898	1.08716	2316.59		1.11069	1.09037	2373.74		1.10883	1.08899	2411.68		1.11664	1.10093	2545.29		1.11296	1.09793	2484.6
								1.0261	1.00585	1973.39		1.11886	1.09704	2339		1.12064	1.10033	2399.81		1.11883	1.09898	2438.16		1.12652	1.11081	2572.94		1.12296	1.10792	2510.23
								1.02611	1.00586	1968.19		1.12873	1.10691	2361.34		1.13084	1.11053	2426		1.12885	1.10901	2464.77		1.13651	1.1208	2600.75		1.13294	1.1179	2535.93
								1.02611	1.00585	1963.19		1.13858	1.11676	2383.46		1.14105	1.12073	2452.27		1.13876	1.11892	2491.54		1.14664	1.13093	2628.55		1.14289	1.12785	2561.68
								1.02611	1.00586	1958.4		1.14845	1.12663	2405.42		1.15097	1.13066	2478.67		1.14861	1.12876	2518.48		1.15664	1.14092	2656.3		1.15273	1.13769	2587.32
								1.02611	1.00585	1953.8		1.15844	1.13662	2427.38		1.16087	1.14055	2505.19		1.15868	1.13884	2545.59		1.16666	1.15095	2684.05		1.16251	1.14747	2612.89
								1.0261	1.00584	1949.37		1.16859	1.14677	2449.84		1.17081	1.15049	2531.75		1.16883	1.14898	2572.7		1.17696	1.16125	2711.9		1.17246	1.15742	2638.53
								1.02609	1.00584	1945.11		1.17867	1.15685	2472.62		1.18063	1.16031	2558.32		1.17876	1.15891	2599.74		1.18708	1.17137	2739.86		1.1826	1.16756	2664.33
								1.02609	1.00583	1940.99		1.18867	1.16685	2495.29		1.19055	1.17024	2584.84		1.18872	1.16888	2626.83		1.19693	1.18122	2767.95		1.19267	1.17764	2690.22
								1.02608	1.00583	1937.02		1.19885	1.17703	2517.81		1.20068	1.18036	2611.3		1.19894	1.17909	2654.1		1.20675	1.19104	2796.09		1.20264	1.1876	2716.15
								1.02608	1.00582	1933.17		1.20907	1.18725	2540.15		1.21069	1.19037	2637.67		1.20891	1.18906	2681.6		1.21668	1.20097	2824.23		1.21278	1.19774	2742.04
								1.02607	1.00582	1929.45		1.21907	1.19725	2562.37		1.22063	1.20031	2664		1.2187	1.19885	2709.24		1.22658	1.21087	2852.31		1.223	1.20796	2767.87
								1.02607	1.00581	1925.84		1.22895	1.20713	2584.47		1.23075	1.21044	2690.38		1.22859	1.20874	2737		1.23666	1.22094	2880.32		1.23305	1.21801	2793.69
								1.02606	1.00581	1922.33		1.23877	1.21695	2606.52		1.24076	1.22045	2716.75		1.23857	1.21873	2764.83		1.24676	1.23105	2908.37		1.24302	1.22798	2819.51
												1.24863	1.22681	2628.6		1.2505	1.23018	2742.91		1.24856	1.22871	2792.69		1.2567	1.24099	2936.46		1.25287	1.23783	2845.35
												1.25861	1.23679	2650.62		1.2602	1.23989	2768.99		1.25867	1.23882	2820.53		1.26676	1.25105	2964.66		1.26267	1.24763	2871.29
												1.26869	1.24687	2672.44		1.27013	1.24982	2795.22		1.26882	1.24897	2848.47		1.27694	1.26122	2993.04		1.27258	1.25754	2897.35
												1.27864	1.25683	2694		1.2801	1.25978	2821.49		1.27883	1.25898	2876.55		1.28699	1.27127	3021.44		1.28267	1.26764	2923.39
												1.28867	1.26685	2715.48		1.28995	1.26963	2847.71		1.28891	1.26906	2904.76		1.2968	1.28109	3049.64		1.29263	1.27759	2949.37
												1.29894	1.27712	2736.95		1.29994	1.27963	2874.07		1.29895	1.27911	2933.08		1.30667	1.29095	3077.77		1.30261	1.28757	2975.32
												1.30899	1.28717	2758.39		1.31029	1.28997	2900.51		1.30887	1.28902	2961.39		1.31675	1.30103	3106.04		1.31282	1.29778	3001.33
												1.31889	1.29707	2779.88		1.3206	1.30028	2926.83		1.31872	1.29887	2989.61		1.32682	1.31111	3134.4		1.32302	1.30798	3027.38
												1.32882	1.307	2801.39		1.33063	1.31032	2952.99		1.32865	1.3088	3017.86		1.33667	1.32096	3162.84		1.33296	1.31792	3053.52
												1.33874	1.31692	2822.84		1.34066	1.32035	2979.18		1.3387	1.31885	3046.21		1.34648	1.33077	3191.39		1.34285	1.32781	3079.73
												1.34855	1.32673	2844.18		1.35075	1.33044	3005.39		1.34877	1.32892	3074.62		1.35656	1.34085	3219.97		1.35275	1.33772	3105.96
												1.35858	1.33676	2865.45		1.36066	1.34034	3031.43		1.35874	1.33889	3103.04		1.36671	1.351	3248.45		1.36258	1.34754	3132.12
												1.36871	1.34689	2886.73		1.37049	1.35017	3057.3		1.36872	1.34888	3131.33		1.37676	1.36105	3276.82		1.37255	1.35751	3158.18
												1.37867	1.35685	2908.11		1.38065	1.36034	3082.84		1.37886	1.35901	3159.35		1.38686	1.37115	3305.07		1.38268	1.36764	3184.1
												1.38868	1.36686	2929.58		1.39078	1.37046	3107.55		1.38896	1.36911	3186.99		1.39679	1.38108	3333.15		1.39267	1.37763	3209.77
												1.39883	1.37701	2950.18		1.40065	1.38034	3131.92		1.39887	1.37902	3214.49		1.40664	1.39093	3361.02		1.40264	1.3876	3235.21
												1.40882	1.387	2968.24		1.41071	1.3904	3156.16		1.40862	1.38878	3242.17		1.41662	1.40091	3388.94		1.41277	1.39773	3260.51
												1.41864	1.39682	2983.09		1.42096	1.40065	3180.43		1.41821	1.39836	3270.12		1.42662	1.41091	3416.99		1.42282	1.40778	3285.9
												1.42856	1.40674	2994.88		1.43088	1.41056	3204.75		1.4277	1.40785	3298.25		1.43625	1.42053	3445.01		1.43251	1.41747	3311.36
												1.4367	1.41488	3003.77		1.44063	1.42032	3229.01		1.43736	1.41751	3326.45		1.44565	1.42994	3472.94		1.44205	1.42701	3336.88
												1.44037	1.41855	3009.7		1.45054	1.43023	3253.16		1.44759	1.42775	3354.63		1.4556	1.43989	3501		1.45167	1.43664	3362.45
												1.44159	1.41977	3012.68		1.46053	1.44021	3277.18		1.45803	1.43819	3382.83		1.46609	1.45038	3529.24		1.46156	1.44652	3388.04
												1.44312	1.4213	3010.11		1.47053	1.45022	3300.96		1.46838	1.44853	3411.22		1.4763	1.46059	3557.67		1.47189	1.45686	3413.64
												1.44355	1.42173	3004.52		1.48067	1.46036	3324.73		1.47865	1.4588	3439.91		1.48621	1.4705	3586.36		1.48228	1.46724	3439.47
												1.4438	1.42198	2997.05		1.49084	1.47053	3349.04		1.48872	1.46887	3468.96		1.49628	1.48056	3615.41		1.49251	1.47747	3465.59
												1.44395	1.42213	2989.36		1.50087	1.48055	3373.31		1.49872	1.47887	3498.29		1.50639	1.49068	3644.71		1.50261	1.48757	3491.92
												1.44403	1.42221	2982		1.51093	1.49061	3397.51		1.50868	1.48883	3527.5		1.51653	1.50082	3673.86		1.51259	1.49755	3518.43
												1.44408	1.42226	2974.91		1.52091	1.50059	3421.59		1.51862	1.49877	3556.4		1.52675	1.51103	3702.77		1.52268	1.50764	3545.01
												1.44412	1.4223	2968.05		1.53086	1.51054	3445.45		1.52855	1.5087	3585.1		1.5369	1.52119	3731.59		1.53277	1.51773	3571.45
												1.44413	1.42231	2961.43		1.54076	1.52045	3469.08		1.53867	1.51883	3613.69		1.54695	1.53123	3760.46		1.54264	1.5276	3597.77
												1.44413	1.42231	2955.06		1.55067	1.53035	3492.61		1.5488	1.52896	3642.17		1.55688	1.54117	3789.33		1.55251	1.53747	3624.18
												1.44412	1.42231	2948.93		1.5607	1.54039	3516.12		1.5587	1.53886	3670.5		1.56679	1.55108	3818.15		1.56268	1.54765	3650.63
												1.44412	1.4223	2943.03		1.57076	1.55044	3539.6		1.56877	1.54892	3698.84		1.57665	1.56094	3846.83		1.57277	1.55773	3676.92
												1.44412	1.4223	2937.36		1.58072	1.56041	3563.04		1.57894	1.55909	3727.26		1.5865	1.57078	3875.38		1.58264	1.5676	3702.95
												1.44411	1.42229	2931.89		1.59072	1.5704	3586.33		1.5889	1.56905	3755.51		1.59645	1.58074	3903.93		1.59277	1.57773	3728.99
												1.4441	1.42228	2926.6		1.60086	1.58055	3609.51		1.59866	1.57881	3783.38		1.60656	1.59085	3932.62		1.60299	1.58795	3755.16
												1.4441	1.42228	2921.48		1.61093	1.59061	3632.59		1.60858	1.58873	3811.09		1.61665	1.60094	3961.43		1.61286	1.59782	3781.42
												1.4441	1.42228	2916.52		1.62087	1.60055	3655.64		1.61874	1.59889	3838.78		1.62662	1.61091	3990.26		1.62258	1.60754	3807.69
												1.44409	1.42227	2911.71		1.63071	1.6104	3678.61		1.62878	1.60894	3866.37		1.63671	1.621	4019		1.63252	1.61748	3833.98
												1.44409	1.42227	2907.05		1.6406	1.62028	3701.56		1.63863	1.61878	3893.88		1.64697	1.63126	4047.65		1.64256	1.62752	3860.23
												1.44407	1.42225	2902.5		1.65053	1.63022	3724.61		1.64854	1.62869	3921.36		1.65702	1.64131	4076.27		1.6526	1.63756	3886.33
												1.44407	1.42225	2898.07		1.66061	1.64029	3747.63		1.65863	1.63878	3948.69		1.66695	1.65124	4104.85		1.66272	1.64768	3912.37
												1.44406	1.42224	2893.76		1.67065	1.65034	3770.51		1.66869	1.64884	3975.7		1.67679	1.66108	4133.39		1.67285	1.65781	3938.47
																1.68062	1.66031	3793.28		1.6787	1.65886	4002.51		1.68661	1.67089	4162		1.6829	1.66786	3964.65
																1.69077	1.67045	3816.05		1.68881	1.66896	4029.27		1.69655	1.68084	4190.68		1.69294	1.6779	3990.85
																1.70099	1.68068	3838.77		1.69877	1.67893	4055.88		1.70667	1.69096	4219.2		1.70292	1.68788	4017.02
																1.71097	1.69065	3861.52		1.70862	1.68877	4081.88		1.71665	1.70093	4247.55		1.71286	1.69782	4043.08
																1.72085	1.70054	3884.31		1.71868	1.69883	4107.83		1.72662	1.7109	4275.84		1.7227	1.70766	4069.02
																1.73077	1.71045	3907.07		1.72889	1.70904	4133.54		1.73683	1.72112	4304.13		1.73263	1.71759	4094.91
																1.74064	1.72032	3929.6		1.73882	1.71897	4158.88		1.74697	1.73125	4332.33		1.74269	1.72765	4120.82
																1.75061	1.7303	3950.67		1.74873	1.72889	4183.99		1.75688	1.74117	4360.48		1.75277	1.73773	4146.76
																1.76075	1.74043	3968.78		1.75896	1.73911	4209.1		1.76682	1.75111	4388.66		1.76273	1.74769	4172.73
																1.77081	1.75049	3983.58		1.76895	1.74911	4234.2		1.77679	1.76107	4416.74		1.77274	1.7577	4198.67
																1.78062	1.7603	3995.16		1.77867	1.75883	4259.18		1.78658	1.77087	4444.64		1.78288	1.76784	4224.57
																1.78829	1.76798	4003.57		1.78852	1.76868	4284		1.79654	1.78083	4472.34		1.79293	1.77789	4250.4
																1.79161	1.7713	4008.86		1.7986	1.77876	4308.78		1.80667	1.79096	4499.94		1.80285	1.78781	4276.22
																1.79276	1.77245	4010.92		1.80863	1.78878	4333.82		1.81664	1.80093	4527.4		1.8127	1.79766	4301.99
																1.79355	1.77323	4009.75		1.81869	1.79884	4358.5		1.8266	1.81088	4554.8		1.8226	1.80756	4327.79
																1.79418	1.77386	4005.49		1.82885	1.809	4382.99		1.83674	1.82102	4582.28		1.83256	1.81752	4353.71
																1.79458	1.77426	3998.33		1.83895	1.8191	4407.38		1.84681	1.8311	4609.76		1.84263	1.82759	4379.64
																1.79481	1.7745	3989.43		1.84899	1.82914	4431.64		1.85665	1.84093	4636.94		1.85265	1.83761	4405.43
																1.79495	1.77464	3980.39		1.8589	1.83905	4455.73		1.86656	1.85085	4663.84		1.8626	1.84756	4431.08
																1.79503	1.77471	3971.71		1.8688	1.84896	4479.59		1.87672	1.86101	4690.67		1.87276	1.85772	4456.68
																1.79508	1.77477	3963.35		1.87864	1.85879	4503.15		1.88689	1.87118	4717.36		1.88298	1.86794	4482.17
																1.79511	1.77479	3955.26		1.8885	1.86865	4526.44		1.89683	1.88112	4743.87		1.89297	1.87793	4507.61
																1.79512	1.7748	3947.46		1.8985	1.87865	4549.62		1.90672	1.89101	4770.31		1.90288	1.88784	4533.08
																1.79513	1.77481	3939.95		1.90862	1.88877	4572.74		1.91678	1.90107	4796.64		1.91282	1.89778	4558.56
																1.79513	1.77481	3932.71		1.91868	1.89883	4595.78		1.92687	1.91116	4822.58		1.92267	1.90763	4583.96
																1.79512	1.77481	3925.73		1.92865	1.90881	4618.65		1.93678	1.92106	4848.14		1.93258	1.91754	4609.19
																1.79512	1.7748	3919.01		1.9388	1.91895	4641.25		1.94677	1.93106	4873.56		1.94268	1.92764	4634.34
																1.79511	1.7748	3912.52		1.94902	1.92918	4663.58		1.95681	1.9411	4898.86		1.95276	1.93772	4659.36
																1.79511	1.77479	3906.25		1.95903	1.93919	4685.7		1.96667	1.95095	4924.01		1.96273	1.9477	4684.34
																1.7951	1.77478	3900.18		1.96894	1.94909	4707.6		1.97655	1.96083	4949.04		1.97286	1.95782	4709.43
																1.79509	1.77478	3894.29		1.97877	1.95892	4729.32		1.98673	1.97101	4973.77		1.98297	1.96793	4734.6
																1.79508	1.77477	3888.57		1.9886	1.96876	4750.92		1.99681	1.98109	4997.63		1.99283	1.97779	4759.63
																1.79508	1.77477	3883.01		1.99859	1.97875	4772.36		2.00666	1.99095	5021.08		2.00264	1.9876	4784.42
																1.79507	1.77476	3877.61		2.0087	1.98886	4793.45		2.01681	2.0011	5044.36		2.01266	1.99762	4809.13
																1.79507	1.77476	3872.34		2.01866	1.99882	4814.19		2.02702	2.01131	5067.66		2.0228	2.00777	4833.82
																				2.02867	2.00882	4834.73		2.03687	2.02116	5090.78		2.03276	2.01772	4858.38
																				2.03892	2.01907	4855.08		2.04656	2.03084	5113.46		2.04262	2.02758	4882.9
																				2.04897	2.02913	4875.17		2.05651	2.0408	5135.79		2.05262	2.03758	4907.46
																				2.0589	2.03905	4895.05		2.06656	2.05084	5157.71		2.06273	2.04769	4931.88
																				2.06884	2.049	4914.74		2.07658	2.06087	5179.12		2.07273	2.05769	4956.02
																				2.07876	2.05892	4934.1		2.08672	2.071	5200.21		2.08274	2.0677	4980.03
																				2.08858	2.06873	4952.15		2.09686	2.08114	5221.55		2.09283	2.07779	5003.96
																				2.09858	2.07874	4967.2		2.10691	2.09119	5242.64		2.10275	2.08771	5027.77
																				2.10871	2.08887	4978.75		2.11695	2.10123	5263.37		2.11265	2.09761	5051.47
																				2.11862	2.09877	4986.89		2.12691	2.1112	5283.68		2.12279	2.10775	5075.03
																				2.12695	2.1071	4991.71		2.13684	2.12113	5303.65		2.13291	2.11787	5098.27
																				2.13106	2.11121	4993.33		2.14674	2.13103	5323.41		2.14275	2.12771	5121.08
																				2.13252	2.11267	4991.8		2.15668	2.14097	5342.96		2.15277	2.13773	5143.61
																				2.13339	2.11355	4987.1		2.16671	2.151	5362.38		2.16303	2.14799	5165.99
																				2.13407	2.11422	4979.32		2.17675	2.16104	5381.72		2.17295	2.15792	5188.19
																				2.13451	2.11466	4968.68		2.18674	2.17102	5400.93		2.18266	2.16762	5210.19
																				2.13477	2.11492	4956.15		2.19673	2.18102	5419.9		2.19254	2.1775	5232.02
																				2.13492	2.11508	4943.48		2.20687	2.19116	5438.63		2.20258	2.18755	5253.56
																				2.13502	2.11517	4931.38		2.21695	2.20123	5457.13		2.21258	2.19755	5274.69
																				2.13508	2.11523	4919.85		2.22685	2.21114	5475.43		2.22267	2.20764	5295.4
																				2.13511	2.11526	4908.82		2.23669	2.22098	5493.49		2.23287	2.21783	5315.86
																				2.13513	2.11528	4898.29		2.2466	2.23088	5511.39		2.24293	2.22789	5336.12
																				2.13513	2.11529	4888.26		2.2566	2.24088	5529.2		2.25293	2.2379	5355.96
																				2.13513	2.11528	4878.66		2.26668	2.25097	5546.79		2.26285	2.24781	5375.13
																				2.13513	2.11529	4869.48		2.27668	2.26097	5563.99		2.27277	2.25773	5393.98
																				2.13512	2.11528	4860.7		2.28664	2.27093	5580.88		2.28261	2.26757	5412.39
																				2.13512	2.11527	4852.27		2.29681	2.2811	5597.57		2.29249	2.27746	5430.42
																				2.13511	2.11527	4844.17		2.307	2.29129	5613.99		2.30251	2.28747	5448.23
																				2.1351	2.11526	4836.38		2.31695	2.30124	5630.21		2.31264	2.2976	5465.77
																				2.1351	2.11525	4828.86		2.32685	2.31114	5646.31		2.32267	2.30763	5482.96
																				2.13509	2.11524	4821.61		2.33682	2.3211	5662.25		2.33267	2.31763	5499.68
																				2.13508	2.11524	4814.59		2.34668	2.33097	5677.91		2.34287	2.32783	5515.91
																				2.13507	2.11523	4807.79		2.35664	2.34093	5693.31		2.35305	2.33801	5531.79
																								2.36675	2.35103	5708.54		2.363	2.34796	5547.54
																								2.37681	2.36109	5723.55		2.37286	2.35782	5562.73
																								2.38673	2.37101	5738.39		2.3827	2.36767	5577.37
																								2.39684	2.38113	5753.21		2.3926	2.37756	5591.49
																								2.40698	2.39127	5768		2.4026	2.38757	5604.92
																								2.41685	2.40114	5782.49		2.41266	2.39762	5617.54
																								2.42664	2.41092	5796.67		2.42266	2.40763	5629.35
																								2.43666	2.42095	5810.72		2.43273	2.41769	5640.38
																								2.44681	2.4311	5824.67		2.44296	2.42792	5650.5
																								2.45676	2.44105	5838.37		2.45297	2.43793	5659.54
																								2.46663	2.45092	5851.88		2.46291	2.44788	5667.51
																								2.47667	2.46095	5865.24		2.47288	2.45784	5674.3
																								2.4868	2.47108	5878.27		2.48272	2.46768	5679.77
																								2.49677	2.48105	5890.8		2.49259	2.47755	5683.9
																								2.50677	2.49106	5902.95		2.50268	2.48764	5686.7
																								2.51685	2.50114	5914.81		2.51277	2.49773	5688.14
																								2.52677	2.51106	5926.31		2.53276	2.51772	5687.57
																								2.53666	2.52094	5937.49		2.54292	2.52788	5686.07
																								2.54682	2.5311	5948.33		2.55287	2.53783	5683.85
																								2.55693	2.54121	5958.62		2.56263	2.54759	5680.95
																								2.56678	2.55107	5967.22		2.57262	2.55758	5677.68
																								2.57684	2.56113	5972.82		2.58285	2.56781	5674.35
																								2.58709	2.57138	5975.13		2.59298	2.57794	5671.01
																								2.60457	2.58886	5970.38		2.60288	2.58785	5667.95
																								2.60806	2.59235	5963.57		2.61281	2.59777	5665.42
																								2.60946	2.59374	5953.97		2.62293	2.6079	5663.41
																								2.6104	2.59469	5941.58		2.63294	2.6179	5661.77
																								2.61109	2.59538	5926.53		2.64286	2.62782	5660.68
																								2.61153	2.59582	5909.18		2.65288	2.63785	5660.25
																								2.6118	2.59608	5890.7		2.6726	2.65756	5661.19
																								2.61195	2.59623	5872.65		2.68265	2.66761	5662.41
																								2.61204	2.59633	5855.5		2.69286	2.67783	5663.9
																								2.6121	2.59639	5839.18		2.70283	2.68779	5665.41
																								2.61213	2.59641	5823.64		2.71276	2.69773	5667.04
																								2.61214	2.59642	5808.84		2.72303	2.70799	5668.89
																								2.61215	2.59643	5794.76		2.73307	2.71803	5670.93
																								2.61214	2.59643	5781.33		2.74279	2.72775	5672.99
																								2.61214	2.59642	5768.5		2.75254	2.7375	5674.98
																								2.61213	2.59642	5756.24		2.76255	2.74751	5676.81
																								2.61213	2.59641	5744.49		2.7726	2.75757	5678.39
																								2.61212	2.59641	5733.23		2.78269	2.76765	5679.65
																								2.61211	2.5964	5722.41		2.79287	2.77783	5680.73
																								2.6121	2.59639	5712		2.80297	2.78793	5681.73
																								2.6121	2.59639	5701.97		2.81301	2.79797	5682.63
																								2.61209	2.59638	5692.3		2.83288	2.81784	5683.86
																												2.85267	2.83763	5684.12
																												2.86271	2.84768	5684.18
																												2.87282	2.85778	5684.29
																												2.88284	2.8678	5684.51
																												2.90286	2.88782	5684.99
																												2.913	2.89797	5685.15
																												2.93285	2.91781	5685.3
																												2.95258	2.93755	5685.25
																												2.96262	2.94758	5685.21
																												2.97271	2.95768	5684.97
																												2.99274	2.9777	5683.79
																												3.00298	2.98794	5682.97
																												3.01305	2.99801	5681.94
																												3.02296	3.00793	5680.72
																												3.03285	3.01781	5679.38
																												3.04277	3.02773	5677.83
																												3.0526	3.03757	5676.03
																												3.06266	3.04762	5674
																												3.07285	3.05781	5671.79
																												3.08285	3.06781	5669.4
																												3.09288	3.07785	5666.96
																												3.10303	3.08799	5664.55
																												3.11303	3.09799	5662.08
																												3.1228	3.10776	5659.44
																												3.13267	3.11763	5656.73
																												3.14278	3.12774	5654.15
																												3.15284	3.13781	5651.65
																												3.16274	3.1477	5649.25
																												3.17269	3.15765	5647.1
																												3.18278	3.16774	5645.15
																												3.19284	3.1778	5643.26
																												3.2028	3.18776	5641.53
																												3.21289	3.19785	5640.12
																												3.22285	3.20781	5639.01
																												3.24271	3.22767	5637.58
																												3.25292	3.23789	5637.19
																												3.27275	3.25771	5636.37
																												3.28296	3.26792	5636.18
																												3.2931	3.27806	5636.27
																												3.31262	3.29758	5636.76
																												3.33268	3.31764	5637.26
																												3.34278	3.32774	5637.29
																												3.35293	3.33789	5637.26
																												3.36303	3.34799	5637.34
																												3.38294	3.3679	5637.74
																												3.4027	3.38766	5638.04
																												3.42253	3.4075	5638.44
																												3.43263	3.4176	5638.93
																												3.4427	3.42766	5639.6
																												3.4527	3.43766	5640.34
																												3.46282	3.44779	5641.06
																												3.47307	3.45803	5641.74
																												3.48311	3.46807	5642.4
																												3.50281	3.48777	5643.62
																												3.52263	3.50759	5644.6
																												3.53273	3.51769	5644.8
																												3.54276	3.52772	5644.71
																												3.56294	3.5479	5643.97
																												3.57307	3.55804	5643.26
																												3.59291	3.57787	5641.27
																												3.60282	3.58778	5639.88
																												3.61261	3.59757	5638.17
																												3.62258	3.60754	5636.18
																												3.63273	3.61769	5634.02
																												3.64274	3.6277	5631.74
																												3.6527	3.63766	5629.48
																												3.66284	3.6478	5627.4
																												3.6729	3.65786	5625.38
																												3.68272	3.66768	5623.17
																												3.6926	3.67756	5620.85
																												3.7028	3.68776	5618.62
																												3.71302	3.69798	5616.48
																												3.72296	3.70792	5614.35
																												3.73283	3.71779	5612.34
																												3.74288	3.72784	5610.41
																												3.75295	3.73791	5608.31
																												3.76282	3.74778	5606.01
																												3.77277	3.75773	5603.77
																												3.78281	3.76777	5601.56
																												3.79271	3.77767	5598.85
																												3.80261	3.78757	5596.23
																												3.81278	3.79775	5593.7
																												3.82289	3.80785	5591.06
																												3.83275	3.81771	5588.23
																												3.84284	3.8278	5578.03
																												3.85306	3.83802	5563
																												3.86292	3.84788	5548.7
																												3.8726	3.85756	5535.09
																												3.88254	3.8675	5522.27
																												3.89262	3.87758	5510.68
																												3.90274	3.8877	5499.61
																												3.91286	3.89782	5489.03
																												3.92296	3.90792	5479.07
																												3.93302	3.91798	5469.69
																												3.94304	3.928	5468.15
																												3.953	3.93796	5471.93
																												3.96291	3.94787	5475.38
																												3.97277	3.95774	5478.36
																												3.98266	3.96762	5480.96
																												3.99271	3.97767	5483.25
																												4.0028	3.98776	5485.27
																												4.01278	3.99774	5487.04
																												4.02278	4.00774	5488.53
																												4.03295	4.01791	5489.84
																												4.04301	4.02797	5491.03
																												4.05291	4.03787	5492.13
																												4.06274	4.0477	5493.13
																												4.07264	4.05761	5494.17
																												4.08266	4.06762	5495.34
																												4.09275	4.07771	5496.5
																												4.11268	4.09764	5375.07
																												4.12281	4.10777	5223.13
																												4.13303	4.11799	5072.53

## Sheet: ESIN 3
ESIN 3 (1000 N)				ESIN 3 (1500 N)				ESIN 3 (2000 N)				ESIN 3 (3000 N)				ESIN 3 (4000 N)
Standard travel	Displacement corrected	Standard force		Standard travel	Displacement corrected	Standard force		Standard travel	Displacement corrected	Standard force		Standard travel	Displacement corrected	Standard force		Standard travel	Displacement corrected	Standard force
mm	mm	N		mm	mm	N		mm	mm	N		mm	mm	N		mm	mm	N
0	-0.0176271	130.027		0	-0.0202767	126.763		0	-0.0223215	125.831		0	-0.0223146	125.447		0	-0.0220113	125.596
-9.44138e-07	-0.017628	129.024		1.13726e-06	-0.0202756	125.595		-1.8239e-07	-0.0223217	124.669		-1.84536e-06	-0.0223164	124.273		-5.14984e-07	-0.0220118	124.475
-3.4225e-06	-0.0176305	127.906		-1.31965e-06	-0.020278	124.5		1.42694e-06	-0.0223201	123.571		-3.00407e-06	-0.0223176	123.196		3.78728e-06	-0.0220075	123.441
-5.54681e-06	-0.0176326	126.835		-6.56605e-06	-0.0202833	123.455		2.73585e-06	-0.0223188	122.538		-2.54273e-06	-0.0223171	122.18		1.54495e-06	-0.0220097	122.312
-9.81688e-06	-0.0176369	125.813		-1.8239e-06	-0.0202785	122.307		1.20163e-06	-0.0223203	121.422		-2.24233e-06	-0.0223168	121.062		-1.23382e-06	-0.0220125	121.264
-7.68185e-06	-0.0176348	124.689		-2.4569e-06	-0.0202792	121.256		-3.61562e-06	-0.0223251	120.357		4.82798e-07	-0.0223141	120.034		1.05786e-05	-0.0220007	120.182
0.000962387	-0.0166647	124.101		0.00250896	-0.0177677	122.213		0.00250546	-0.019816	121.36		0.00183053	-0.020484	120.238		0.00239399	-0.0196173	121.423
0.0022171	-0.01541	125.127		0.00414536	-0.0161313	124.189		0.00414117	-0.0181803	123.306		0.00328752	-0.0190271	121.716		0.00397872	-0.0180325	123.242
0.00377359	-0.0138535	127.05		0.00511646	-0.0151602	125.527		0.00511154	-0.01721	124.614		0.00415762	-0.018157	122.788		0.00493936	-0.0170719	124.472
0.00470994	-0.0129171	128.383		0.00620746	-0.0140692	127.102		0.00616733	-0.0161542	126.146		0.00513435	-0.0171802	124.072		0.00599943	-0.0160118	125.925
0.00575315	-0.0118739	129.966		0.00737572	-0.012901	128.91		0.00733362	-0.0149879	127.905		0.00621591	-0.0160987	125.576		0.00713705	-0.0148742	127.592
0.00688704	-0.01074	131.804		0.0086584	-0.0116183	130.938		0.00860403	-0.0137175	129.872		0.0073729	-0.0149417	127.296		0.00836805	-0.0136432	129.467
0.00812507	-0.00950202	133.882		0.0100385	-0.0102382	133.161		0.00997024	-0.0123513	132.019		0.00863648	-0.0136781	129.219		0.00970718	-0.0123041	131.526
0.00946189	-0.00816519	136.182		0.0114956	-0.00878113	135.56		0.011456	-0.0108655	134.32		0.00999734	-0.0123172	131.321		0.0111668	-0.0108444	133.751
0.0109156	-0.00671146	138.672		0.0130581	-0.00721858	138.1		0.0130441	-0.00927745	136.757		0.0114442	-0.0108703	133.573		0.0127127	-0.00929861	136.118
0.0124567	-0.00517035	141.332		0.0147106	-0.0055661	140.768		0.0147102	-0.00761127	139.317		0.0130062	-0.00930836	135.952		0.0143602	-0.00765112	138.613
0.0140872	-0.00353992	144.134		0.0164744	-0.00380229	143.569		0.0164578	-0.00586369	141.999		0.0146582	-0.00765641	138.461		0.0161166	-0.00589468	141.23
0.0158115	-0.00181563	147.077		0.0183338	-0.00194289	146.5		0.0183299	-0.00399157	144.801		0.0164083	-0.00590629	141.092		0.0179847	-0.0040266	143.968
0.0176271	0	150.171		0.0202767	0	149.565		0.0202741	-0.00204744	147.711		0.0182737	-0.0040409	143.826		0.0199526	-0.00205866	146.837
0.0195459	0.00191881	153.407		0.0223082	0.00203153	152.768		0.0223215	0	150.749		0.020237	-0.00207762	146.685		0.0220113	0	149.824
0.0215447	0.00391761	156.802		0.0244516	0.00417493	156.117		0.0244523	0.0021308	153.914		0.0223146	0	149.669		0.0241369	0.00212564	152.935
0.0236433	0.00601621	160.35		0.0267085	0.00643183	159.613		0.026683	0.00436149	157.205		0.0244813	0.00216672	152.775		0.0263612	0.0043499	156.178
0.0258479	0.00822086	164.052		0.0290931	0.00881637	163.262		0.0290138	0.00669233	160.631		0.0267397	0.00442517	156.009		0.0286836	0.00667236	159.558
0.0281726	0.0105455	167.913		0.0315584	0.0112817	167.059		0.0314601	0.00913858	164.185		0.0291077	0.00679317	159.373		0.0310862	0.00907493	163.062
0.0306204	0.0129933	171.928		0.0341282	0.0138515	171.006		0.034047	0.0117255	167.876		0.0315732	0.00925858	162.881		0.0335973	0.0115861	166.692
0.0331616	0.0155345	176.088		0.0367775	0.0165008	175.115		0.0367142	0.0143927	171.72		0.0341245	0.0118099	166.526		0.0362345	0.0142232	170.442
0.0357898	0.0181628	180.425		0.0395229	0.0192462	179.372		0.0394684	0.0171469	175.717		0.0367803	0.0144657	170.308		0.0389904	0.0169792	174.322
0.0384913	0.0208642	184.948		0.042371	0.0220942	183.783		0.0422988	0.0199773	179.873		0.0395517	0.0172371	174.213		0.0418296	0.0198184	178.35
0.0412759	0.0236488	189.659		0.0453207	0.025044	188.342		0.0452682	0.0229467	184.182		0.0424613	0.0201467	178.252		0.0447426	0.0227313	182.533
0.0441523	0.0265252	194.556		0.0483979	0.0281212	193.035		0.0483572	0.0260357	188.625		0.0454475	0.0231329	182.417		0.0477285	0.0257173	186.867
0.0471418	0.0295147	199.628		0.0515895	0.0313128	197.849		0.0515823	0.0292608	193.217		0.048516	0.0262014	186.72		0.050824	0.0288127	191.36
0.0502735	0.0326464	204.882		0.0548552	0.0345784	202.808		0.0549015	0.03258	197.972		0.05166	0.0293454	191.183		0.0540509	0.0320396	195.995
0.0535049	0.0358778	210.322		0.0581941	0.0379173	207.924		0.0582652	0.0359437	202.902		0.0548692	0.0325546	195.802		0.0574047	0.0353934	200.784
0.0568262	0.0391991	215.952		0.0616073	0.0413306	213.195		0.0616867	0.0393652	208.002		0.0581824	0.0358678	200.579		0.0608419	0.0388307	205.736
0.0602289	0.0426019	221.771		0.0651116	0.0448349	218.626		0.0652145	0.042893	213.253		0.0616514	0.0393369	205.52		0.0643535	0.0423423	210.854
0.0637415	0.0461144	227.782		0.0687303	0.0484536	224.225		0.0688631	0.0465416	218.644		0.0652325	0.042918	210.637		0.0679618	0.0459505	216.135
0.0673722	0.0497451	233.952		0.0725052	0.0522285	230.019		0.0726604	0.0503389	224.185		0.0688892	0.0465747	215.924		0.0717117	0.0497004	221.567
0.071116	0.053489	240.262		0.0763687	0.056092	236.007		0.0765329	0.0542114	229.885		0.072616	0.0503014	221.375		0.0756011	0.0535898	227.141
0.0749629	0.0573358	246.738		0.0803103	0.0600336	242.177		0.0804606	0.0581391	235.753		0.0764823	0.0541677	226.981		0.0795981	0.0575868	232.864
0.0788763	0.0612492	253.393		0.0843752	0.0640985	248.546		0.0844719	0.0621504	241.803		0.0805094	0.0581949	232.751		0.0836609	0.0616497	238.751
0.082824	0.0651969	260.214		0.0886174	0.0683407	255.147		0.088626	0.0663045	248.041		0.0846316	0.0623171	238.7		0.087786	0.0657748	244.798
0.0868593	0.0692322	267.204		0.0929736	0.0726969	261.978		0.0929174	0.0705959	254.468		0.0887635	0.0664489	244.803		0.0920155	0.0700043	251.006
0.0910584	0.0734313	274.393		0.0973297	0.0770529	269.005		0.0972829	0.0749614	261.055		0.0929423	0.0706277	251.062		0.0963859	0.0743747	257.38
0.0953966	0.0777696	281.781		0.101734	0.0814571	276.211		0.101736	0.0794146	267.79		0.0972395	0.074925	257.501		0.100869	0.0788581	263.918
0.0998123	0.0821852	289.344		0.106274	0.0859969	283.603		0.106337	0.0840158	274.706		0.101692	0.0793774	264.108		0.105442	0.0834309	270.608
0.104324	0.0866966	297.103		0.110981	0.0907043	291.176		0.111059	0.0887374	281.833		0.106245	0.0839308	270.865		0.110111	0.0880999	277.477
0.109034	0.0914067	305.106		0.115753	0.095476	298.912		0.115847	0.0935257	289.174		0.110859	0.0885442	277.786		0.114931	0.0929201	284.549
0.113857	0.0962298	313.351		0.120553	0.100276	306.829		0.120645	0.098323	296.735		0.115612	0.0932977	284.907		0.11982	0.0978091	291.821
0.11867	0.101043	321.763		0.125496	0.105219	314.971		0.125531	0.103209	304.54		0.120512	0.0981975	292.259		0.12473	0.102719	299.247
0.123518	0.105891	330.294		0.130584	0.110307	323.324		0.130587	0.108265	312.565		0.125471	0.103157	299.858		0.129708	0.107697	306.82
0.128537	0.11091	338.957		0.135729	0.115452	331.826		0.13574	0.113419	320.744		0.130495	0.108181	307.676		0.134851	0.11284	314.569
0.133679	0.116051	347.739		0.140992	0.120716	340.481		0.140983	0.118662	329.086		0.13566	0.113345	315.717		0.140091	0.11808	322.498
0.138852	0.121225	356.608		0.14643	0.126153	349.351		0.146417	0.124095	337.639		0.140973	0.118659	323.966		0.145332	0.123321	330.604
0.144065	0.126438	365.636		0.151956	0.131679	358.463		0.151961	0.129639	346.417		0.146404	0.124089	332.388		0.150649	0.128637	338.916
0.149386	0.131759	374.919		0.15747	0.137193	367.838		0.157456	0.135134	355.407		0.151903	0.129589	341.003		0.156159	0.134148	347.446
0.154771	0.137144	384.433		0.163049	0.142772	377.465		0.162996	0.140674	364.614		0.157475	0.13516	349.842		0.161775	0.139764	356.142
0.160202	0.142575	394.126		0.168798	0.148521	387.285		0.168757	0.146436	374.015		0.16315	0.140835	358.895		0.167471	0.14546	365
0.165849	0.148222	404.022		0.174626	0.154349	397.28		0.174581	0.15226	383.602		0.168882	0.146567	368.13		0.173378	0.151367	374.053
0.171837	0.15421	414.196		0.180624	0.160348	407.459		0.180477	0.158155	393.39		0.174742	0.152427	377.54		0.179401	0.157389	383.387
0.177939	0.160312	424.716		0.186815	0.166538	417.83		0.186581	0.164259	403.431		0.180754	0.15844	387.109		0.185394	0.163383	393.01
0.184028	0.166401	435.539		0.192941	0.172664	428.449		0.192748	0.170427	413.752		0.186804	0.16449	396.871		0.191464	0.169453	402.865
0.190179	0.172552	446.604		0.199067	0.17879	439.304		0.198981	0.176659	424.328		0.192884	0.17057	406.865		0.197677	0.175665	412.924
0.196419	0.178792	457.936		0.205401	0.185124	450.35		0.205384	0.183062	435.111		0.19906	0.176745	417.112		0.20408	0.182069	423.185
0.202883	0.185256	469.491		0.211809	0.191532	461.598		0.211931	0.189609	446.096		0.205322	0.183007	427.628		0.210712	0.1887	433.644
0.209456	0.191829	481.209		0.21832	0.198043	473.069		0.218546	0.196225	457.324		0.211686	0.189372	438.391		0.217394	0.195383	444.317
0.215888	0.198261	493.118		0.225015	0.204739	484.788		0.225251	0.202929	468.772		0.218228	0.195914	449.366		0.223981	0.20197	455.26
0.222372	0.204745	505.237		0.23175	0.211474	496.775		0.231991	0.20967	480.445		0.224906	0.202591	460.571		0.230636	0.208625	466.447
0.229056	0.211429	517.562		0.238608	0.218331	509.003		0.238819	0.216497	492.339		0.231706	0.209391	472.052		0.237406	0.215395	477.886
0.235815	0.218188	530.122		0.245647	0.22537	521.452		0.245814	0.223492	504.431		0.238643	0.216329	483.834		0.244282	0.222271	489.572
0.242756	0.225129	542.893		0.252809	0.232533	534.167		0.25287	0.230548	516.733		0.245614	0.2233	495.913		0.251315	0.229304	501.487
0.249818	0.232191	555.9		0.260022	0.239745	547.119		0.259965	0.237644	529.285		0.252659	0.230344	508.244		0.258366	0.236354	513.641
0.256897	0.23927	569.205		0.267257	0.246981	560.281		0.267127	0.244806	542.11		0.259887	0.237573	520.829		0.265549	0.243537	526.061
0.264187	0.24656	582.768		0.2746	0.254323	573.669		0.274346	0.252025	555.22		0.267264	0.244949	533.691		0.272931	0.25092	538.788
0.271582	0.253955	596.59		0.282142	0.261865	587.307		0.281738	0.259417	568.621		0.274754	0.25244	546.78		0.280399	0.258388	551.803
0.279071	0.261444	610.665		0.28971	0.269434	601.212		0.289285	0.266963	582.289		0.282209	0.259895	560.115		0.287953	0.265941	565.058
0.286629	0.269002	624.999		0.297271	0.276994	615.387		0.296993	0.274671	596.264		0.289703	0.267388	573.722		0.295556	0.273545	578.558
0.294237	0.27661	639.593		0.304878	0.284601	629.864		0.304826	0.282505	610.574		0.29737	0.275055	587.667		0.303345	0.281334	592.337
0.301972	0.284345	654.457		0.312567	0.29229	644.627		0.312704	0.290383	625.214		0.30501	0.282696	601.935		0.311287	0.289276	606.391
0.309745	0.292118	669.58		0.32049	0.300213	659.668		0.320676	0.298354	640.195		0.312745	0.29043	616.435		0.319219	0.297208	620.699
0.317595	0.299968	684.969		0.328591	0.308314	675.033		0.32885	0.306528	655.5		0.320599	0.298284	631.183		0.327231	0.30522	635.255
0.325517	0.30789	700.643		0.336862	0.316585	690.752		0.337158	0.314837	671.058		0.328645	0.30633	646.274		0.335303	0.313292	650.071
0.333493	0.315866	716.573		0.345164	0.324888	706.843		0.345499	0.323177	686.859		0.336949	0.314634	661.717		0.343514	0.321503	665.121
0.341636	0.324009	732.796		0.353458	0.333182	723.289		0.353797	0.331475	702.955		0.345193	0.322878	677.402		0.351898	0.329887	680.382
0.349961	0.332334	749.349		0.361983	0.341706	740.08		0.362258	0.339937	719.415		0.353443	0.331129	693.363		0.36042	0.338408	695.886
0.358503	0.340876	766.237		0.370746	0.350469	757.095		0.370715	0.348393	736.202		0.361938	0.339624	709.61		0.368992	0.34698	711.685
0.367074	0.349447	783.431		0.379527	0.359251	774.306		0.379197	0.356876	753.257		0.37077	0.348456	726.151		0.377563	0.355552	727.769
0.375656	0.358029	800.934		0.388247	0.367971	791.773		0.387829	0.365508	770.627		0.379518	0.357203	742.908		0.386242	0.364231	744.148
0.384468	0.366841	818.705		0.397102	0.376826	809.618		0.396763	0.374441	788.393		0.388193	0.365878	759.926		0.395135	0.373124	760.746
0.393494	0.375867	836.664		0.405964	0.385687	827.798		0.405789	0.383467	806.469		0.396948	0.374634	777.328		0.404171	0.382159	777.512
0.402519	0.384892	854.823		0.414836	0.394559	846.185		0.414767	0.392445	824.761		0.405849	0.383534	795.062		0.413169	0.391158	794.493
0.411484	0.393857	873.233		0.423834	0.403557	864.779		0.423895	0.401574	843.325		0.414808	0.392494	813.045		0.422278	0.400267	811.782
0.420532	0.402905	891.972		0.433168	0.412892	883.562		0.433391	0.411069	862.206		0.42391	0.401595	831.278		0.43149	0.409479	829.376
0.429594	0.411966	910.971		0.442609	0.422333	902.44		0.442978	0.420657	881.365		0.433216	0.410901	849.859		0.440742	0.418731	847.256
0.438766	0.421139	930.212		0.451975	0.431699	921.481		0.452373	0.430052	900.838		0.442618	0.420303	868.773		0.450063	0.428052	865.455
0.448114	0.430487	949.63		0.461446	0.44117	940.858		0.461749	0.439428	920.664		0.452024	0.429709	888.022		0.459656	0.437645	883.964
0.457759	0.440132	968.178		0.471143	0.450867	960.592		0.471324	0.449003	940.766		0.461637	0.439323	907.651		0.469399	0.447388	902.651
0.467371	0.449744	984.752		0.480669	0.460392	980.582		0.480982	0.45866	961.076		0.471394	0.449079	927.683		0.479081	0.45707	921.473
0.477033	0.459406	999.135		0.490248	0.469971	1000.81		0.490791	0.46847	981.553		0.481154	0.45884	948.004		0.488922	0.466911	940.501
0.486737	0.46911	1011.41		0.500224	0.479947	1021.26		0.500809	0.478488	1002.21		0.490905	0.46859	968.453		0.499067	0.477056	959.774
0.493548	0.475921	1021.53		0.510377	0.490101	1041.89		0.510788	0.488466	1023.08		0.500778	0.478463	989.072		0.50901	0.486999	979.286
0.495993	0.478366	1029.4		0.520383	0.500106	1062.7		0.520712	0.498391	1044.17		0.510849	0.488535	1009.9		0.518806	0.496795	999.02
0.496875	0.479248	1034.96		0.530485	0.510209	1083.7		0.530808	0.508486	1065.48		0.52095	0.498636	1030.91		0.528674	0.506663	1018.94
0.497676	0.480049	1038.24		0.540639	0.520362	1104.95		0.540862	0.51854	1087		0.530886	0.508572	1052.07		0.538639	0.516628	1038.98
0.49884	0.481213	1035.21		0.550632	0.530355	1126.3		0.550801	0.52848	1108.51		0.540772	0.518457	1073.37		0.548584	0.526573	1059.1
0.498958	0.481331	1032.45		0.560638	0.540361	1147.7		0.560668	0.538346	1129.97		0.5508	0.528485	1094.73		0.558707	0.536696	1079.27
0.499029	0.481402	1029.76		0.570756	0.550479	1169.16		0.570693	0.548372	1151.47		0.560881	0.538567	1116.03		0.568853	0.546842	1099.55
0.49907	0.481443	1027.09		0.5808	0.560523	1190.66		0.580855	0.558534	1173.06		0.570855	0.54854	1137.33		0.578824	0.556813	1119.94
0.499088	0.48146	1024.44		0.590687	0.57041	1212.02		0.590915	0.568594	1194.66		0.58086	0.558546	1158.69		0.588871	0.566859	1140.46
0.499098	0.481471	1021.86		0.600637	0.58036	1233.31		0.60081	0.578489	1216.35		0.590791	0.568476	1180.15		0.598979	0.576968	1161.1
0.499106	0.481479	1019.34		0.610759	0.590482	1254.64		0.610778	0.588457	1238.1		0.600628	0.578313	1201.73		0.608946	0.586935	1181.8
0.499104	0.481477	1016.89		0.620908	0.600631	1275.97		0.620858	0.598537	1259.83		0.610574	0.588259	1223.44		0.618755	0.596744	1202.43
0.499107	0.48148	1014.52		0.630873	0.610596	1297.33		0.630863	0.608541	1281.48		0.620743	0.598428	1245.14		0.628656	0.606645	1223.09
0.499097	0.48147	1012.22		0.640756	0.620479	1318.76		0.640839	0.618517	1303.15		0.630745	0.608431	1266.77		0.638731	0.61672	1243.88
0.499092	0.481465	1009.99		0.650831	0.630554	1340.17		0.650815	0.628493	1324.8		0.640679	0.618364	1288.37		0.648813	0.626802	1264.74
0.499089	0.481462	1007.82		0.660882	0.640605	1361.45		0.6607	0.638379	1346.4		0.650881	0.628566	1310.07		0.658758	0.636747	1285.68
0.499079	0.481452	1005.72		0.670824	0.650547	1382.64		0.670566	0.648245	1367.91		0.660988	0.638674	1331.89		0.668712	0.6467	1306.69
0.499074	0.481447	1003.66		0.680861	0.660584	1403.84		0.680682	0.65836	1389.34		0.670812	0.648497	1353.84		0.678853	0.656842	1327.72
0.499067	0.48144	1001.66		0.690796	0.670519	1425.08		0.690765	0.668443	1410.71		0.680619	0.658304	1375.86		0.688959	0.666948	1348.73
0.499061	0.481434	999.703		0.700611	0.680334	1445.99		0.7005	0.678179	1432.04		0.690603	0.668288	1397.91		0.698898	0.676887	1369.77
0.499054	0.481427	997.793		0.710541	0.690265	1465.34		0.710225	0.687904	1453.42		0.700579	0.678264	1419.96		0.708851	0.68684	1390.88
0.499048	0.481421	995.926		0.720774	0.700498	1482.24		0.720179	0.697858	1474.9		0.710673	0.688358	1441.96		0.718683	0.696672	1412.05
0.499046	0.481418	994.104		0.730812	0.710536	1496.54		0.730098	0.707776	1496.49		0.720842	0.698528	1464.01		0.72851	0.706499	1433.35
				0.739915	0.719639	1508.27		0.740095	0.717774	1518.11		0.73085	0.708536	1486.12		0.738534	0.716523	1454.78
				0.74542	0.725143	1517.55		0.750215	0.727893	1539.83		0.74085	0.718535	1508.31		0.748706	0.726694	1476.21
				0.747424	0.727148	1524.37		0.760334	0.738013	1561.66		0.750946	0.728632	1530.59		0.758664	0.736653	1497.6
				0.748373	0.728097	1528.65		0.770424	0.748103	1583.61		0.760963	0.738648	1552.9		0.768681	0.74667	1519.01
				0.74919	0.728913	1530.34		0.780597	0.758276	1605.6		0.770806	0.748491	1575.11		0.778988	0.756976	1540.53
				0.750125	0.729848	1526.57		0.790767	0.768446	1627.6		0.780657	0.758343	1597.27		0.78912	0.767109	1562.15
				0.750319	0.730043	1522.65		0.800796	0.778475	1649.54		0.790705	0.76839	1619.54		0.79897	0.776959	1583.87
				0.750444	0.730167	1518.67		0.810889	0.788567	1671.42		0.800799	0.778484	1641.9		0.808799	0.786788	1605.71
				0.750504	0.730227	1514.77		0.82094	0.798619	1693.25		0.810775	0.788461	1664.3		0.818755	0.796743	1627.61
				0.750554	0.730277	1510.9		0.830895	0.808574	1714.98		0.820703	0.798388	1686.78		0.828619	0.806608	1649.48
				0.750572	0.730295	1507.09		0.840755	0.818433	1736.54		0.830792	0.808477	1709.3		0.838599	0.816587	1671.31
				0.750577	0.730301	1503.37		0.850681	0.828359	1758.03		0.840953	0.818638	1731.77		0.848731	0.82672	1693.19
				0.750579	0.730303	1499.76		0.86074	0.838418	1779.54		0.850911	0.828597	1754.2		0.858762	0.836751	1715.14
				0.750583	0.730307	1496.25		0.870822	0.848501	1801.03		0.860872	0.838557	1776.57		0.868826	0.846814	1737.23
				0.75058	0.730303	1492.84		0.880764	0.858443	1822.5		0.870755	0.84844	1798.82		0.878939	0.856928	1759.48
				0.750576	0.730299	1489.54		0.890732	0.868411	1843.93		0.880596	0.858282	1820.99		0.888971	0.86696	1781.82
								0.900884	0.878563	1865.28		0.890526	0.868212	1843.16		0.898859	0.876848	1804.12
								0.910994	0.888672	1886.56		0.900585	0.878271	1865.36		0.908742	0.88673	1826.42
								0.920931	0.89861	1907.83		0.910372	0.888057	1887.59		0.918781	0.896769	1848.84
								0.930811	0.908489	1929.06		0.920038	0.897724	1909.86		0.928803	0.906791	1871.41
								0.940648	0.918327	1949.74		0.930084	0.90777	1932.2		0.938683	0.916672	1894.13
								0.950539	0.928218	1968.43		0.940275	0.91796	1954.58		0.948565	0.926554	1917
								0.960587	0.938266	1984.42		0.950397	0.928082	1977.09		0.95862	0.936609	1939.96
								0.970639	0.948317	1997.69		0.960488	0.938173	1999.79		0.968743	0.946731	1962.93
								0.979298	0.956977	2008.3		0.970568	0.948254	2022.69		0.978779	0.956768	1985.97
								0.983759	0.961438	2016.29		0.980469	0.958154	2045.71		0.988863	0.966851	2009.11
								0.985314	0.962993	2021.67		0.99051	0.968196	2068.72		0.998821	0.97681	2032.36
								0.986225	0.963904	2024.42		1.00069	0.978374	2091.68		1.00872	0.986711	2055.78
								0.987475	0.965153	2021.91		1.01075	0.988434	2114.54		1.01873	0.996721	2079.33
								0.987755	0.965434	2017.3		1.02077	0.99846	2137.37		1.02887	1.00686	2102.84
								0.98791	0.965589	2012.04		1.0309	1.00858	2160.29		1.03883	1.01682	2126.24
								0.988005	0.965684	2006.83		1.04096	1.01864	2183.27		1.04875	1.02674	2149.61
								0.988055	0.965733	2001.73		1.05082	1.02851	2206.1		1.05895	1.03693	2173.08
								0.988087	0.965766	1996.71		1.06066	1.03835	2228.78		1.06898	1.04697	2196.64
								0.988101	0.965779	1991.81		1.07072	1.0484	2251.49		1.07876	1.05675	2220.3
								0.98811	0.965788	1987.04		1.08078	1.05847	2274.25		1.08862	1.06661	2244.05
								0.988109	0.965788	1982.42		1.0907	1.06838	2297.03		1.09866	1.07664	2267.81
								0.988102	0.965781	1977.93		1.10057	1.07826	2319.89		1.10863	1.08662	2291.5
								0.988105	0.965783	1973.59		1.11061	1.0883	2342.78		1.1187	1.09669	2315.11
								0.988097	0.965775	1969.37		1.12073	1.09841	2365.58		1.12886	1.10685	2338.77
								0.988093	0.965771	1965.28		1.13074	1.10842	2388.27		1.13891	1.1169	2362.51
								0.98809	0.965768	1961.29		1.1408	1.11849	2410.95		1.14889	1.12688	2386.29
								0.988083	0.965762	1957.42		1.15084	1.12853	2433.67		1.15888	1.13686	2410.16
								0.988081	0.965759	1953.63		1.16074	1.13842	2456.39		1.16883	1.14681	2434.08
								0.98807	0.965748	1949.94		1.17066	1.14834	2479.19		1.17867	1.15665	2457.91
								0.988072	0.965751	1946.34		1.18083	1.15851	2501.94		1.18848	1.16647	2481.68
								0.98806	0.965739	1942.82		1.19086	1.16854	2524.48		1.19847	1.17646	2505.55
								0.988057	0.965735	1939.37		1.2007	1.17838	2546.8		1.20862	1.1866	2529.53
												1.21083	1.18851	2569.09		1.21868	1.19667	2553.54
												1.22105	1.19873	2591.44		1.22869	1.20668	2577.6
												1.23088	1.20857	2613.83		1.23884	1.21683	2601.58
												1.24061	1.2183	2636.24		1.24904	1.22703	2625.4
												1.25057	1.22826	2658.63		1.25902	1.23701	2649.03
												1.26061	1.2383	2680.93		1.26897	1.24696	2672.46
												1.27068	1.24836	2703.02		1.27879	1.25678	2695.79
												1.28083	1.25852	2725.04		1.28852	1.2665	2719.2
												1.29093	1.26861	2747.09		1.29826	1.27625	2742.73
												1.30091	1.27859	2769.17		1.3081	1.28609	2766.28
												1.31089	1.28858	2791.27		1.3179	1.29588	2789.8
												1.32083	1.29851	2813.37		1.32786	1.30585	2813.32
												1.33072	1.3084	2835.36		1.33821	1.3162	2836.97
												1.34051	1.31819	2857.17		1.34859	1.32658	2860.75
												1.35045	1.32814	2878.27		1.35868	1.33667	2884.78
												1.36058	1.33827	2893.04		1.36866	1.34665	2909.05
												1.37075	1.34843	2905.86		1.37867	1.35666	2933.44
												1.38073	1.35842	2918.49		1.38851	1.3665	2957.81
												1.39074	1.36843	2930.95		1.3985	1.37649	2982.1
												1.40096	1.37865	2943.28		1.40862	1.38661	3006.39
												1.41111	1.3888	2955.49		1.4186	1.39659	3030.74
												1.42108	1.39876	2967.42		1.42861	1.4066	3055.03
												1.4309	1.40858	2977.67		1.43878	1.41677	3079.41
												1.4407	1.41838	2985.16		1.44884	1.42683	3103.97
												1.45058	1.42826	2990.33		1.45868	1.43666	3128.44
												1.46023	1.43792	2998.94		1.46859	1.44658	3152.85
												1.46651	1.4442	3006.59		1.47874	1.45673	3177.34
												1.46886	1.44655	3011.48		1.48892	1.46691	3201.81
												1.46993	1.44762	3013.64		1.49888	1.47687	3225.78
												1.47081	1.44849	3013.05		1.50877	1.48676	3249.63
												1.47144	1.44913	3009.61		1.51881	1.4968	3273.38
												1.47182	1.44951	3003.52		1.52887	1.50686	3296.85
												1.47204	1.44973	2996.24		1.53877	1.51676	3319.23
												1.47217	1.44986	2988.93		1.54878	1.52677	3341.41
												1.47226	1.44994	2981.81		1.5588	1.53679	3363.44
												1.4723	1.44999	2974.82		1.56865	1.54664	3385.3
												1.47233	1.45002	2967.98		1.57854	1.55652	3407.03
												1.47235	1.45003	2961.32		1.58875	1.56674	3428.56
												1.47235	1.45003	2954.86		1.59883	1.57682	3450.14
												1.47235	1.45003	2948.58		1.60865	1.58664	3471.36
												1.47235	1.45004	2942.5		1.61877	1.59675	3492.32
												1.47235	1.45003	2936.61		1.62897	1.60696	3513.25
												1.47234	1.45002	2930.89		1.63884	1.61683	3532
												1.47234	1.45002	2925.32		1.64859	1.62658	3547.34
												1.47233	1.45002	2919.88		1.65855	1.63654	3562.17
												1.47232	1.45001	2914.57		1.66856	1.64655	3576.48
												1.47232	1.45	2909.39		1.67859	1.65657	3590.14
												1.47232	1.45	2904.34		1.68877	1.66676	3603.21
																1.69893	1.67691	3615.75
																1.70892	1.68691	3627.77
																1.71894	1.69693	3639.13
																1.72894	1.70693	3649.69
																1.73885	1.71684	3661.72
																1.75864	1.73663	3655.89
																1.76871	1.7467	3649.89
																1.77881	1.7568	3642.75
																1.78877	1.76676	3634.89
																1.7989	1.77689	3626.42
																1.80909	1.78707	3617.35
																1.81906	1.79705	3607.82
																1.82891	1.8069	3597.96
																1.83874	1.81672	3588.12
																1.84863	1.82662	3592.91
																1.8586	1.83659	3601.26
																1.8687	1.84669	3609.36
																1.87872	1.85671	3617.35
																1.88868	1.86667	3624.7
																1.89887	1.87686	3631.37
																1.90905	1.88703	3637.34
																1.91899	1.89698	3642.75
																1.92887	1.90686	3647.71
																1.9388	1.91679	3652.25
																1.94865	1.92664	3656.23
																1.95862	1.93661	3659.74
																1.9688	1.94679	3662.86
																1.97884	1.95683	3665.67
																1.9888	1.96679	3668.07
																1.99894	1.97693	3669.96
																2.00904	1.98703	3671.3
																2.02873	2.00672	3672.19
																2.03875	2.01674	3672.49
																2.04886	2.02685	3673.05
																2.06866	2.04665	3675.19
																2.07869	2.05668	3677.07
																2.0888	2.06679	3679.72
																2.0988	2.07679	3683.48
																2.10882	2.0868	3688.55
																2.11885	2.09684	3694.81
																2.12871	2.1067	3701.98
																2.13861	2.1166	3709.88
																2.14883	2.12682	3718.34
																2.15898	2.13697	3727.12
																2.16883	2.14682	3736.17
																2.17884	2.15683	3745.66
																2.18908	2.16707	3755.65
																2.19899	2.17698	3766.06
																2.20869	2.18668	3776.77
																2.2186	2.19659	3787.78
																2.22863	2.20662	3799.01
																2.23866	2.21665	3810.27
																2.24876	2.22675	3821.55
																2.2589	2.23688	3832.94
																2.26893	2.24692	3844.43
																2.27894	2.25693	3855.9
																2.28886	2.26685	3867.27
																2.29877	2.27676	3878.41
																2.30863	2.28661	3889.23
																2.31852	2.29651	3899.8
																2.32859	2.30658	3910.23
																2.33872	2.31671	3920.5
																2.34875	2.32674	3930.6
																2.35876	2.33675	3940.46
																2.36896	2.34695	3950.08
																2.37909	2.35708	3959.51
																2.389	2.36699	3968.78
																2.39884	2.37683	3977.14
																2.40873	2.38672	3983.5
																2.41866	2.39665	3987.5
																2.42866	2.40665	3989.1
																2.4425	2.42049	3985.14
																2.44588	2.42386	3979.56
																2.44859	2.42658	3971.58
																2.45075	2.42874	3961.18
																2.45229	2.43028	3948.43
																2.45323	2.43122	3934.22
																2.45373	2.43172	3919.76
																2.45399	2.43198	3905.49
																2.45415	2.43214	3891.43
																2.45425	2.43224	3877.65
																2.4543	2.43229	3864.29
																2.45433	2.43232	3851.45
																2.45435	2.43234	3839.17
																2.45436	2.43235	3827.47
																2.45436	2.43235	3816.29
																2.45436	2.43235	3805.6
																2.45435	2.43234	3795.34
																2.45435	2.43234	3785.48
																2.45434	2.43233	3775.98
																2.45434	2.43233	3766.82
																2.45433	2.43232	3757.97
																2.45433	2.43232	3749.41

## Sheet: ESIN 4
ESIN 4 (1000 N)				ESIN 4 (1500 N)				ESIN 4 (2000 N)				ESIN 4 (3000 N)
Standard travel	Displacement corrected	Standard force		Standard travel	Displacement corrected	Standard force		Standard travel	Displacement corrected	Standard force		Standard travel	Displacement corrected	Standard force
mm	mm	N		mm	mm	N		mm	mm	N		mm	mm	N
0	-0.0643576	106.824		0	-0.0602428	111.846		0	-0.0603854	110.28		0	-0.0748964	106.484
1.10507e-06	-0.0643565	105.787		-2.08139e-06	-0.0602449	110.721		8.79765e-07	-0.0603845	109.215		-4.19497e-06	-0.0749006	105.371
-1.87755e-06	-0.0643595	104.664		-4.6885e-06	-0.0602475	109.671		-1.23274e-05	-0.0603977	108.046		-4.77433e-06	-0.0749012	104.329
-6.09398e-06	-0.0643637	103.623		-7.25269e-06	-0.0602501	108.534		-7.97152e-06	-0.0603934	106.956		-6.5124e-06	-0.0749029	103.202
-2.43545e-06	-0.06436	102.469		-4.63486e-06	-0.0602474	107.498		-9.28044e-06	-0.0603947	105.923		-4.24862e-06	-0.0749006	102.174
5.25713e-07	-0.0643571	101.418		-6.66261e-06	-0.0602495	106.485		-6.49095e-06	-0.0603919	104.809		-5.19276e-06	-0.0749016	101.071
0.000102278	-0.0642553	100.399		-7.91788e-06	-0.0602507	105.389		0.000209223	-0.0601762	103.8		0.00295685	-0.0719395	101.31
0.00313805	-0.0612195	101.416		0.00380129	-0.0564415	106.492		0.00377605	-0.0566094	105.287		0.00473737	-0.070159	102.408
0.00493502	-0.0594226	102.651		0.00574278	-0.0545	107.962		0.00574685	-0.0546386	106.732		0.00690022	-0.0679962	103.983
0.0071239	-0.0572337	104.402		0.00806517	-0.0521776	109.914		0.00810834	-0.0522771	108.677		0.00947033	-0.0654261	105.997
0.00837297	-0.0559846	105.457		0.00938047	-0.0508623	111.062		0.00945251	-0.0509329	109.813		0.010905	-0.0639914	107.129
0.00972511	-0.0546325	106.624		0.0107877	-0.0494551	112.301		0.0108701	-0.0495153	111.038		0.0124433	-0.0624531	108.328
0.0111853	-0.0531723	107.879		0.0122949	-0.0479479	113.627		0.0124013	-0.0479841	112.337		0.0140865	-0.0608099	109.593
0.0127417	-0.0516159	109.215		0.013915	-0.0463278	115.024		0.0140253	-0.0463601	113.709		0.0158372	-0.0590592	110.915
0.0143929	-0.0499647	110.633		0.0156356	-0.0446072	116.5		0.015754	-0.0446314	115.145		0.0176557	-0.0572407	112.297
0.0161561	-0.0482014	112.127		0.0174931	-0.0427497	118.057		0.0175566	-0.0428288	116.645		0.0195619	-0.0553345	113.73
0.0180079	-0.0463497	113.699		0.0194335	-0.0408093	119.68		0.0194634	-0.040922	118.212		0.021579	-0.0533173	115.214
0.0199427	-0.0444148	115.345		0.021461	-0.0387818	121.362		0.0214658	-0.0389196	119.841		0.0236942	-0.0512022	116.753
0.0219673	-0.0423903	117.064		0.0235663	-0.0366765	123.13		0.0235668	-0.0368186	121.534		0.0259062	-0.0489902	118.331
0.024086	-0.0402716	118.863		0.0257589	-0.0344839	124.963		0.0257781	-0.0346073	123.285		0.0282199	-0.0466765	119.957
0.0263096	-0.038048	120.727		0.0280727	-0.0321701	126.852		0.0281113	-0.0322741	125.092		0.0306507	-0.0442457	121.632
0.0286251	-0.0357325	122.662		0.0304741	-0.0297687	128.803		0.0305533	-0.0298321	126.967		0.0331828	-0.0417136	123.354
0.0310636	-0.033294	124.661		0.0329781	-0.0272647	130.81		0.0330857	-0.0272997	128.91		0.035805	-0.0390914	125.114
0.0336029	-0.0307547	126.718		0.0356164	-0.0246264	132.876		0.035685	-0.0247004	130.931		0.0385231	-0.0363733	126.921
0.0362463	-0.0281112	128.83		0.0383793	-0.0218635	134.988		0.0383997	-0.0219857	133.023		0.0413173	-0.0335791	128.78
0.0390016	-0.025356	130.998		0.0412346	-0.0190082	137.148		0.0412245	-0.0191609	135.179		0.0441782	-0.0307182	130.682
0.0418116	-0.022546	133.215		0.0441732	-0.0160696	139.361		0.0441789	-0.0162065	137.386		0.0471421	-0.0277543	132.629
0.0447033	-0.0196542	135.479		0.0471906	-0.0130522	141.637		0.0472498	-0.0131356	139.644		0.0502672	-0.0246292	134.613
0.0476929	-0.0166647	137.792		0.0502734	-0.00996943	143.975		0.0504489	-0.00993648	141.95		0.0535092	-0.0213872	136.65
0.0508248	-0.0135328	140.144		0.0534783	-0.00676452	146.382		0.053707	-0.00667839	144.318		0.0568027	-0.0180937	138.742
0.0541014	-0.0102562	142.561		0.056805	-0.00343782	148.859		0.0569951	-0.00339028	146.749		0.0601948	-0.0147016	140.9
0.0574557	-0.00690184	145.042		0.0602428	0	151.415		0.0603854	0	149.228		0.0636695	-0.0112269	143.123
0.0608573	-0.00350026	147.594		0.063771	0.00352821	154.054		0.0638858	0.00350036	151.757		0.0672714	-0.00762495	145.413
0.0643576	0	150.214		0.0673756	0.00713284	156.766		0.0675104	0.00712497	154.338		0.0710275	-0.00386892	147.763
0.0679881	0.00363048	152.9		0.071119	0.0108762	159.536		0.0712375	0.0108521	156.976		0.0748964	0	150.169
0.0717723	0.00741472	155.645		0.0750184	0.0147756	162.368		0.0750255	0.0146401	159.674		0.0788449	0.0039485	152.644
0.075675	0.0113174	158.463		0.0790399	0.0187971	165.265		0.0788804	0.018495	162.426		0.0828361	0.00793971	155.18
0.0796596	0.0153021	161.36		0.0831023	0.0228595	168.23		0.0828517	0.0224663	165.251		0.0869283	0.0120319	157.787
0.0836798	0.0193222	164.344		0.0871762	0.0269334	171.242		0.0869725	0.0265871	168.16		0.0911641	0.0162677	160.461
0.0877754	0.0234178	167.426		0.0913359	0.0310931	174.309		0.0911859	0.0308005	171.155		0.0955006	0.0206042	163.197
0.0920204	0.0276628	170.604		0.0956304	0.0353876	177.438		0.0954445	0.0350591	174.238		0.0999193	0.0250229	165.973
0.0963716	0.0320141	173.862		0.100059	0.0398162	180.613		0.0997973	0.0394119	177.408		0.104462	0.0295655	168.777
0.100813	0.0364558	177.18		0.104536	0.0442929	183.83		0.104328	0.0439425	180.658		0.109165	0.0342688	171.607
0.105374	0.0410162	180.557		0.109077	0.0488339	187.114		0.109008	0.0486225	183.987		0.113955	0.0390587	174.133
0.110128	0.0457706	184.013		0.113797	0.0535543	190.508		0.113765	0.0533792	187.388		0.118749	0.0438531	176.121
0.114986	0.0506286	187.558		0.118628	0.0583855	194.021		0.118575	0.0581892	190.87		0.123626	0.0487291	178.223
0.119838	0.0554808	191.179		0.123452	0.0632089	197.644		0.123472	0.0630863	194.455		0.128667	0.0537703	180.476
0.124711	0.0603537	194.871		0.128396	0.0681535	201.366		0.128509	0.0681234	198.137		0.133813	0.0589161	182.875
0.129715	0.0653576	198.64		0.133535	0.0732925	205.198		0.133653	0.0732679	201.898		0.13898	0.0640832	185.394
0.134849	0.0704918	202.467		0.138809	0.078566	209.128		0.138883	0.0784978	205.733		0.144207	0.0693106	188.027
0.140025	0.0756677	206.34		0.144151	0.0839082	213.165		0.144278	0.0838929	209.653		0.149603	0.0747069	190.779
0.145302	0.0809442	210.285		0.149564	0.0893214	217.322		0.149775	0.0893896	213.658		0.155125	0.0802291	193.657
0.150758	0.0864003	214.354		0.155098	0.0948553	221.611		0.155279	0.094894	217.754		0.160706	0.0858091	196.658
0.156236	0.0918781	218.556		0.160734	0.100492	226.013		0.160867	0.100481	221.967		0.166434	0.0915379	200.129
0.161768	0.0974102	222.863		0.166488	0.106245	230.514		0.16661	0.106225	226.311		0.172313	0.0974162	204.312
0.167483	0.103126	227.274		0.172392	0.112149	235.094		0.172405	0.11202	230.764		0.178196	0.1033	208.562
0.173376	0.109019	231.796		0.178366	0.118124	239.759		0.17823	0.117845	235.325		0.184103	0.109207	212.856
0.179343	0.114985	236.428		0.184376	0.124133	244.537		0.184222	0.123836	239.992		0.190163	0.115267	217.191
0.185387	0.121029	241.172		0.190506	0.130263	249.442		0.190353	0.129967	244.76		0.196384	0.121488	221.602
0.191552	0.127194	246.027		0.196714	0.136471	254.469		0.196525	0.136139	249.63		0.202756	0.127859	226.102
0.197807	0.133449	250.999		0.202964	0.142721	259.605		0.202844	0.142459	254.602		0.209309	0.134412	230.678
0.204228	0.13987	256.086		0.209301	0.149058	264.848		0.209291	0.148906	259.694		0.215866	0.14097	235.344
0.210754	0.146397	261.258		0.215804	0.155562	270.188		0.215736	0.15535	264.924		0.222465	0.147569	240.114
0.217274	0.152917	266.53		0.222425	0.162182	275.641		0.222256	0.161871	270.267		0.22921	0.154314	244.989
0.223905	0.159547	271.933		0.229114	0.168871	281.224		0.228959	0.168573	275.715		0.236005	0.161108	249.98
0.230665	0.166308	277.464		0.235949	0.175707	286.95		0.235825	0.175439	281.292		0.242868	0.167972	255.067
0.237456	0.173098	283.122		0.242814	0.182571	292.838		0.242858	0.182472	286.976		0.249896	0.175	260.228
0.244299	0.179942	288.893		0.24973	0.189487	298.87		0.249953	0.189567	292.768		0.257008	0.182111	265.5
0.251309	0.186951	294.772		0.256826	0.196583	305.041		0.257056	0.196671	298.693		0.264319	0.189422	270.894
0.258432	0.194074	300.792		0.264118	0.203876	311.354		0.264284	0.203898	304.771		0.27172	0.196824	276.411
0.265687	0.20133	306.958		0.271563	0.21132	317.78		0.271573	0.211188	310.997		0.279052	0.204156	282.041
0.273004	0.208647	313.275		0.279016	0.218773	324.328		0.278941	0.218556	317.342		0.286505	0.211609	287.779
0.280328	0.215971	319.746		0.28653	0.226287	331.03		0.286469	0.226084	323.806		0.29412	0.219223	293.642
0.2878	0.223442	326.364		0.294191	0.233948	337.908		0.294132	0.233746	330.425		0.301984	0.227088	299.633
0.295473	0.231116	333.118		0.301859	0.241616	344.91		0.301966	0.24158	337.222		0.309805	0.234909	305.739
0.303327	0.238969	339.978		0.309615	0.249372	352.041		0.309762	0.249377	344.157		0.317589	0.242693	311.98
0.311257	0.246899	346.952		0.317557	0.257314	359.325		0.317593	0.257207	351.217		0.32552	0.250623	318.419
0.319182	0.254824	354.071		0.325667	0.265424	366.788		0.325566	0.265181	358.416		0.333593	0.258697	325.031
0.327263	0.262905	361.36		0.333836	0.273593	374.397		0.333791	0.273406	365.774		0.34181	0.266914	331.766
0.335388	0.271031	368.774		0.341957	0.281714	382.118		0.342123	0.281738	373.268		0.350067	0.275171	338.604
0.343571	0.279213	376.312		0.350217	0.289975	389.987		0.350317	0.289931	380.895		0.358554	0.283658	345.598
0.351891	0.287533	383.993		0.358719	0.298476	398.018		0.3586	0.298215	388.731		0.367245	0.292349	352.772
0.360446	0.296089	391.853		0.367396	0.307153	406.206		0.36705	0.306664	396.783		0.375971	0.301074	360.087
0.369051	0.304694	399.85		0.375913	0.31567	414.53		0.375678	0.315292	404.968		0.384637	0.309741	367.514
0.377584	0.313226	407.932		0.384477	0.324234	423.064		0.384336	0.323951	413.244		0.393458	0.318561	375.068
0.38624	0.321883	416.163		0.393201	0.332958	431.824		0.393195	0.33281	421.683		0.402447	0.327551	382.785
0.395201	0.330844	424.57		0.402102	0.341859	440.738		0.402311	0.341925	430.33		0.411442	0.336546	390.634
0.404269	0.339911	433.124		0.411084	0.350841	449.749		0.411459	0.351074	439.154		0.420379	0.345482	398.586
0.413163	0.348805	441.736		0.420262	0.36002	458.911		0.420522	0.360136	448.112		0.429354	0.354458	406.663
0.422136	0.357779	450.459		0.429674	0.369431	468.288		0.429733	0.369348	457.25		0.438622	0.363725	414.92
0.431346	0.366988	459.392		0.439126	0.378884	477.855		0.439099	0.378713	466.597		0.448155	0.373259	423.354
0.440664	0.376306	468.44		0.448489	0.388247	487.569		0.448459	0.388074	476.087		0.457744	0.382848	431.945
0.450062	0.385704	477.595		0.457987	0.397744	497.472		0.457764	0.397378	485.677		0.467336	0.39244	440.701
0.459766	0.395409	486.924		0.467642	0.4074	507.575		0.467182	0.406796	495.416		0.477121	0.402225	449.62
0.469611	0.405253	496.447		0.477292	0.417049	517.791		0.476924	0.416539	505.364		0.487149	0.412253	458.635
0.479331	0.414973	506.098		0.486859	0.426616	528.074		0.486839	0.426454	515.481		0.497182	0.422285	467.712
0.489106	0.424748	515.878		0.496611	0.436368	538.483		0.496774	0.436389	525.724		0.507133	0.432237	476.891
0.499079	0.434722	525.834		0.506643	0.4464	549.076		0.506726	0.446341	536.12		0.517116	0.44222	486.19
0.509011	0.444653	536.01		0.516709	0.456466	559.8		0.516863	0.456478	546.625		0.526909	0.452012	495.589
0.51875	0.454392	546.33		0.526691	0.466448	570.622		0.52705	0.466664	557.177		0.536639	0.461743	505.087
0.528497	0.46414	556.706		0.536698	0.476455	581.555		0.537061	0.476675	567.778		0.5466	0.471703	514.697
0.538506	0.474148	567.22		0.546887	0.486644	592.567		0.547079	0.486694	578.47		0.556725	0.481829	524.354
0.54866	0.484302	577.835		0.557055	0.496812	603.578		0.556985	0.4966	589.248		0.566665	0.491769	534.037
0.558691	0.494333	588.505		0.567043	0.5068	614.622		0.566722	0.506337	600.111		0.576613	0.501717	543.76
0.56867	0.504313	599.256		0.577041	0.516798	625.745		0.576558	0.516173	611.082		0.586924	0.512028	553.575
0.578848	0.51449	610.071		0.586893	0.52665	636.949		0.586667	0.526282	622.125		0.597096	0.522199	563.497
0.589032	0.524675	620.911		0.59667	0.536427	648.248		0.596708	0.536323	633.201		0.606962	0.532065	573.502
0.59903	0.534673	631.761		0.606569	0.546326	659.647		0.606601	0.546215	644.294		0.616792	0.541895	583.579
0.60904	0.544682	642.67		0.616708	0.556466	671.094		0.616772	0.556387	655.464		0.626724	0.551828	593.709
0.618926	0.554569	653.66		0.626687	0.566444	682.555		0.627054	0.566668	666.734		0.636627	0.56173	603.876
0.628707	0.564349	664.743		0.636623	0.57638	694.044		0.637017	0.576632	678.12		0.646647	0.571751	614.056
0.63857	0.574213	675.932		0.646888	0.586646	705.613		0.64683	0.586445	689.586		0.656721	0.581825	624.279
0.648678	0.584321	687.178		0.657074	0.596831	717.29		0.656758	0.596372	701.112		0.666708	0.591812	634.588
0.658686	0.594328	698.44		0.66697	0.606727	729.074		0.66666	0.606274	712.681		0.676739	0.601842	645.019
0.668614	0.604257	709.725		0.676798	0.616556	740.935		0.676611	0.616225	724.267		0.686846	0.611949	655.558
0.678845	0.614488	721.091		0.686734	0.626492	752.843		0.686679	0.626293	735.869		0.696855	0.621959	666.16
0.689075	0.624717	732.533		0.696643	0.6364	764.777		0.696722	0.636337	747.535		0.70676	0.631863	676.757
0.699001	0.634644	744.09		0.706627	0.646384	776.718		0.70669	0.646305	759.305		0.716739	0.641842	687.381
0.708804	0.644446	755.734		0.716696	0.656453	788.701		0.716801	0.656416	771.193		0.726854	0.651958	698.097
0.718747	0.654389	767.438		0.726692	0.666449	800.779		0.726869	0.666483	783.181		0.736941	0.662045	708.907
0.728652	0.664295	779.183		0.736696	0.676454	812.967		0.736798	0.676413	795.169		0.746868	0.671972	719.812
0.738618	0.67426	790.939		0.746827	0.686584	825.276		0.74672	0.686335	807.142		0.756739	0.681842	730.828
0.748679	0.684322	802.727		0.756854	0.696611	837.675		0.756768	0.696383	819.177		0.766775	0.691879	741.886
0.758695	0.694338	814.606		0.766777	0.706535	850.068		0.766885	0.7065	831.307		0.776903	0.702007	752.949
0.768714	0.704357	826.597		0.776724	0.716481	862.467		0.776913	0.716528	843.508		0.786909	0.712012	764.085
0.778841	0.714483	838.711		0.786794	0.726551	874.981		0.786787	0.726401	855.831		0.796903	0.722007	775.317
0.788868	0.724511	850.941		0.796908	0.736665	887.592		0.796761	0.736375	868.232		0.806795	0.731899	786.642
0.798775	0.734418	863.179		0.806869	0.746626	900.299		0.80687	0.746485	880.656		0.816623	0.741726	798.092
0.808728	0.74437	875.399		0.816743	0.7565	913.126		0.816885	0.7565	893.113		0.826618	0.751722	809.667
0.818786	0.754428	887.698		0.826782	0.766539	926.017		0.826893	0.766507	905.672		0.836795	0.761899	821.266
0.828888	0.764531	900.089		0.836912	0.776669	938.932		0.836859	0.776474	918.331		0.846767	0.77187	832.852
0.83891	0.774552	912.57		0.846901	0.786659	951.899		0.846698	0.786313	931.12		0.856687	0.781791	844.476
0.848794	0.784437	925.192		0.856883	0.79664	964.963		0.856573	0.796187	944.068		0.866885	0.791989	856.19
0.85877	0.794413	937.897		0.866799	0.806556	978.127		0.866702	0.806316	957.106		0.876955	0.802059	868.01
0.868875	0.804517	950.617		0.87666	0.816417	991.436		0.876785	0.8164	970.156		0.886795	0.811899	879.935
0.878879	0.814522	963.328		0.886599	0.826356	1004.89		0.886693	0.826307	983.218		0.89667	0.821774	891.949
0.888888	0.82453	975.513		0.896736	0.836493	1018.39		0.896757	0.836371	996.375		0.906639	0.831742	904.038
0.89886	0.834502	986.319		0.906757	0.846514	1031.87		0.906939	0.846554	1009.63		0.916564	0.841667	916.175
0.908715	0.844358	995.518		0.916669	0.856426	1045.37		0.916859	0.856473	1023.03		0.926631	0.851734	928.361
0.918487	0.854129	1003.16		0.926852	0.866609	1058.96		0.926718	0.866333	1036.52		0.936812	0.861916	940.64
0.926255	0.861897	1009.24		0.936975	0.876732	1072.64		0.936657	0.876272	1050.09		0.946848	0.871952	953.012
0.929468	0.865111	1013.71		0.946818	0.886576	1086.44		0.946576	0.886191	1063.7		0.956848	0.881952	965.489
0.930455	0.866098	1016.52		0.956675	0.896432	1100.33		0.956571	0.896186	1077.35		0.966988	0.892091	978.1
0.931409	0.867052	1017.74		0.966645	0.906402	1114.27		0.966741	0.906355	1091.05		0.977005	0.902109	990.802
0.932693	0.868335	1015.53		0.97656	0.916317	1128.24		0.97685	0.916464	1104.83		0.986812	0.911916	1003.5
0.932908	0.86855	1012.64		0.986607	0.926364	1142.19		0.986817	0.926431	1118.68		0.996649	0.921752	1016.25
0.933038	0.868681	1009.64		0.996791	0.936549	1156.21		0.996918	0.936533	1132.63		1.00673	0.93183	1029.12
0.933127	0.86877	1006.78		1.00685	0.946603	1170.29		1.00701	0.946623	1146.68		1.01685	0.941958	1042.1
0.933183	0.868825	1003.98		1.01684	0.956595	1184.44		1.01691	0.956524	1160.72		1.02682	0.951924	1055.14
0.933214	0.868857	1001.2		1.02695	0.966709	1198.67		1.02671	0.966326	1174.73		1.03675	0.961852	1068.29
0.933235	0.868877	998.491		1.037	0.976758	1212.95		1.03668	0.976293	1188.82		1.04686	0.971968	1081.5
0.933238	0.86888	995.882		1.04685	0.986609	1227.17		1.0468	0.986411	1203.02		1.05698	0.982086	1094.73
0.933247	0.868889	993.357		1.05669	0.996443	1241.32		1.05684	0.996453	1217.25		1.06689	0.991994	1108.02
0.933249	0.868892	990.919		1.06672	1.00648	1255.46		1.06677	1.00638	1231.56		1.07686	1.00196	1121.4
0.933251	0.868893	988.565		1.07681	1.01657	1269.55		1.0768	1.01641	1245.93		1.08674	1.01185	1134.88
0.933245	0.868887	986.285		1.08681	1.02656	1283.59		1.08693	1.02654	1260.33		1.09654	1.02164	1148.45
0.933242	0.868885	984.075		1.0967	1.03646	1297.66		1.09693	1.03654	1274.73		1.10648	1.03159	1162.12
0.933236	0.868879	981.927		1.10663	1.04639	1311.8		1.10686	1.04647	1289.2		1.11666	1.04176	1175.85
0.93323	0.868873	979.837		1.11649	1.05625	1325.99		1.1168	1.05642	1303.74		1.12667	1.05178	1189.58
0.933232	0.868875	977.8		1.12624	1.066	1340.24		1.12662	1.06624	1318.35		1.13664	1.06174	1203.3
0.93323	0.868872	975.817		1.13609	1.07585	1354.56		1.13647	1.07608	1333.08		1.14689	1.072	1217.1
0.933225	0.868867	973.88		1.14607	1.08583	1368.96		1.14657	1.08619	1347.89		1.15708	1.08218	1230.92
0.933221	0.868863	971.997		1.15618	1.09594	1383.49		1.15666	1.09627	1362.69		1.16701	1.09211	1244.7
0.933219	0.868862	970.149		1.16627	1.10603	1398.22		1.16656	1.10618	1377.39		1.1768	1.10191	1258.36
0.933216	0.868859	968.341		1.17649	1.11625	1413.08		1.1767	1.11631	1392.01		1.18672	1.11182	1272.02
0.933218	0.86886	966.573		1.18657	1.12633	1428		1.18705	1.12666	1406.6		1.19655	1.12165	1285.78
				1.19661	1.13637	1442.9		1.1971	1.13671	1421.16		1.20631	1.13141	1299.61
				1.20684	1.14659	1457.69		1.20683	1.14645	1435.78		1.21604	1.14114	1313.48
				1.21707	1.15683	1471.51		1.21647	1.15608	1450.53		1.22576	1.15086	1327.39
				1.22702	1.16677	1483.54		1.22613	1.16574	1465.35		1.23604	1.16114	1341.39
				1.23685	1.17661	1493.66		1.23586	1.17548	1480.15		1.24658	1.17168	1355.51
				1.24648	1.18624	1501.93		1.24586	1.18548	1494.93		1.25682	1.18192	1369.75
				1.2531	1.19286	1508.31		1.25618	1.1958	1509.73		1.26674	1.19185	1384.06
				1.25575	1.19551	1512.7		1.26645	1.20606	1524.66		1.27663	1.20173	1398.51
				1.257	1.19676	1515.2		1.27668	1.21629	1539.77		1.2867	1.21181	1413.06
				1.25803	1.19778	1515.85		1.28686	1.22648	1555.06		1.29679	1.22189	1427.59
				1.25878	1.19853	1514.68		1.29686	1.23648	1570.4		1.30668	1.23179	1442.08
				1.25922	1.19898	1511.8		1.30671	1.24632	1585.64		1.31653	1.24164	1456.65
				1.25947	1.19923	1508.05		1.31669	1.2563	1600.79		1.32658	1.25169	1471.27
				1.25963	1.19939	1504.21		1.3268	1.26642	1615.9		1.33669	1.26179	1485.85
				1.25971	1.19946	1500.45		1.33676	1.27638	1631.01		1.34671	1.27181	1500.43
				1.25975	1.19951	1496.73		1.34659	1.2862	1646.17		1.35683	1.28193	1515.05
				1.25978	1.19954	1493.06		1.35654	1.29616	1661.39		1.36683	1.29193	1529.73
				1.25979	1.19955	1489.49		1.36664	1.30625	1676.57		1.3767	1.3018	1544.49
				1.2598	1.19956	1486.01		1.37668	1.31629	1691.68		1.38669	1.31179	1559.33
				1.2598	1.19956	1482.65		1.38672	1.32634	1706.78		1.39689	1.322	1574.18
				1.25981	1.19956	1479.39		1.39685	1.33646	1721.9		1.40686	1.33196	1588.94
				1.2598	1.19956	1476.22		1.40678	1.34639	1737.05		1.41673	1.34184	1603.61
				1.2598	1.19956	1473.15		1.41665	1.35626	1752.23		1.42688	1.35199	1618.34
				1.25979	1.19955	1470.16		1.42678	1.3664	1767.43		1.43703	1.36214	1633.13
				1.25978	1.19954	1467.26		1.4369	1.37652	1782.5		1.44684	1.37194	1648
				1.25978	1.19954	1464.43		1.44678	1.38639	1797.38		1.45664	1.38174	1662.91
				1.25978	1.19953	1461.67		1.45676	1.39637	1812.16		1.46664	1.39174	1677.86
				1.25977	1.19952	1458.97		1.46702	1.40663	1826.92		1.47663	1.40174	1692.76
				1.25976	1.19952	1456.34		1.47696	1.41657	1841.67		1.4867	1.4118	1707.57
				1.25976	1.19952	1453.76		1.48671	1.42633	1856.38		1.49686	1.42196	1722.38
				1.25976	1.19952	1451.23		1.49661	1.43622	1871.02		1.50695	1.43206	1737.23
				1.25975	1.19951	1448.77		1.50665	1.44627	1885.56		1.51696	1.44206	1752.1
				1.25975	1.1995	1446.34		1.51665	1.45627	1899.94		1.52693	1.45203	1767
								1.52677	1.46639	1914.16		1.53686	1.46196	1781.93
								1.53692	1.47653	1928.31		1.54675	1.47185	1796.78
								1.54694	1.48656	1942.39		1.55654	1.48165	1811.56
								1.55695	1.49656	1956.31		1.56648	1.49158	1826.35
								1.5669	1.50652	1969.24		1.57657	1.50168	1841.21
								1.57682	1.51644	1980.17		1.58667	1.51177	1856.08
								1.58663	1.52624	1988.83		1.59664	1.52174	1870.93
								1.5963	1.53592	1995.38		1.60674	1.53185	1885.68
								1.60349	1.54311	1999.88		1.61699	1.54209	1900.35
								1.60642	1.54603	2002.32		1.62706	1.55216	1914.92
								1.60755	1.54717	2002.74		1.63701	1.56211	1929.42
								1.60845	1.54807	2001.19		1.64688	1.57198	1943.83
								1.60915	1.54876	1997.7		1.65669	1.58179	1958.18
								1.60955	1.54917	1992.34		1.66658	1.59168	1972.47
								1.60978	1.54939	1985.97		1.67667	1.60178	1986.59
								1.60991	1.54952	1979.61		1.6867	1.6118	2000.53
								1.60999	1.5496	1973.49		1.69665	1.62175	2014.31
								1.61004	1.54966	1967.58		1.70685	1.63195	2028
								1.61007	1.54969	1961.83		1.71703	1.64213	2041.56
								1.61009	1.5497	1956.29		1.72696	1.65207	2055
								1.61009	1.54971	1950.95		1.73686	1.66196	2068.33
								1.61009	1.54971	1945.8		1.74677	1.67188	2081.49
								1.61009	1.54971	1940.85		1.75661	1.68171	2094.42
								1.61009	1.5497	1936.07		1.76657	1.69168	2107.11
								1.61008	1.5497	1931.45		1.7767	1.70181	2119.62
								1.61008	1.54969	1926.98		1.78673	1.71184	2131.95
								1.61007	1.54968	1922.64		1.79664	1.72175	2144.16
								1.61007	1.54969	1918.44		1.80677	1.73187	2156.32
								1.61006	1.54967	1914.35		1.81685	1.74196	2168.39
								1.61006	1.54967	1910.38		1.82674	1.75185	2180.18
								1.61005	1.54967	1906.51		1.83663	1.76173	2191.68
								1.61006	1.54967	1902.74		1.84674	1.77185	2203.02
								1.61004	1.54966	1899.05		1.85692	1.78202	2214.24
												1.8669	1.792	2225.26
												1.87676	1.80187	2236.17
												1.88678	1.81189	2246.95
												1.8969	1.822	2257.47
												1.90686	1.83196	2267.71
												1.91681	1.84192	2277.79
												1.92684	1.85194	2287.79
												1.93674	1.86184	2297.69
												1.94658	1.87168	2307.53
												1.9567	1.88181	2317.28
												1.96684	1.89194	2326.86
												1.97671	1.90181	2336.19
												1.98674	1.91185	2345.39
												1.997	1.9221	2354.58
												2.00692	1.93202	2363.76
												2.01667	1.94177	2372.88
												2.02655	1.95166	2381.94
												2.03656	1.96166	2390.92
												2.0466	1.9717	2399.75
												2.05673	1.98183	2408.48
												2.0669	1.992	2417.2
												2.07692	2.00203	2425.99
												2.08697	2.01208	2434.8
												2.09698	2.02209	2443.56
												2.1069	2.032	2452
												2.11677	2.04187	2460.37
												2.12668	2.05178	2468.74
												2.13671	2.06181	2477.15
												2.14677	2.07188	2485.57
												2.15675	2.08185	2493.98
												2.16676	2.09186	2502.33
												2.17689	2.10199	2510.61
												2.18697	2.11207	2518.85
												2.1969	2.122	2527.14
												2.20674	2.13185	2535.67
												2.21659	2.1417	2544.2
												2.22651	2.15162	2552.82
												2.23661	2.16171	2561.47
												2.24667	2.17177	2570.07
												2.25664	2.18175	2578.63
												2.26677	2.19187	2587.23
												2.27705	2.20216	2595.86
												2.28705	2.21215	2604.52
												2.29691	2.22201	2613.23
												2.30679	2.23189	2621.96
												2.31667	2.24177	2630.6
												2.3266	2.2517	2639.11
												2.33673	2.26183	2647.52
												2.34683	2.27193	2655.83
												2.35679	2.28189	2664.07
												2.36689	2.29199	2672.31
												2.37701	2.30211	2680.55
												2.38695	2.31205	2688.65
												2.39675	2.32186	2696.54
												2.4168	2.3419	2689.28
												2.4268	2.3519	2682.63
												2.43664	2.36174	2676.33
												2.44659	2.37169	2670.49
												2.45676	2.38186	2665.03
												2.46687	2.39198	2659.86
												2.47685	2.40196	2654.96
												2.48692	2.41202	2650.38
												2.49686	2.42196	2646.16
												2.5067	2.4318	2650.5
												2.51678	2.44189	2661.56
												2.52694	2.45205	2672.57
												2.53682	2.46193	2683.34
												2.54676	2.47187	2693.89
												2.55698	2.48208	2704.33
												2.56689	2.492	2714.66
												2.57663	2.50173	2724.92
												2.58654	2.51164	2735.07
												2.59659	2.5217	2745.03
												2.60663	2.53174	2754.75
												2.61675	2.54185	2764.23
												2.62692	2.55203	2772.71
												2.63698	2.56209	2778.1
												2.64699	2.5721	2783.18
												2.65691	2.58202	2788.15
												2.66679	2.59189	2792.98
												2.67661	2.60171	2797.63
												2.68652	2.61162	2802.18
												2.69657	2.62167	2806.74
												2.7067	2.6318	2811.33
												2.71674	2.64185	2815.92
												2.72672	2.65183	2821.34
												2.73689	2.662	2829.7
												2.74709	2.6722	2838.17
												2.7571	2.6822	2846.62
												2.767	2.69211	2855.04
												2.7768	2.70191	2863.46
												2.7866	2.7117	2871.91
												2.79657	2.72168	2880.36
												2.80668	2.73179	2888.72
												2.81666	2.74177	2897.02
												2.82669	2.75179	2905.28
												2.83693	2.76203	2913.52
												2.84697	2.77208	2921.75
												2.85691	2.78201	2930
												2.86687	2.79197	2938.22
												2.87675	2.80185	2946.35
												2.88658	2.81168	2954.35
												2.89664	2.82175	2962.22
												2.90674	2.83184	2969.98
												2.91666	2.84176	2977.44
												2.9267	2.85181	2983.87
												2.93687	2.86197	2988.6
												2.94688	2.87198	2991.45
												2.96321	2.88832	2991.5
												2.96685	2.89195	2988.83
												2.96906	2.89416	2984.35
												2.97086	2.89596	2978.07
												2.97226	2.89737	2970.12
												2.9732	2.8983	2960.72
												2.97373	2.89883	2950.7
												2.97401	2.89911	2940.8
												2.97417	2.89927	2931.18
												2.97427	2.89937	2921.81
												2.97432	2.89943	2912.73
												2.97436	2.89946	2903.97
												2.97438	2.89948	2895.56
												2.97438	2.89948	2887.51
												2.97438	2.89949	2879.82

## Sheet: ESIN 5
ESIN 5 (1000 N)				ESIN 5 (1500 N)				ESIN 5 (2000 N)				ESIN 5 (3000 N)				ESIN 5 (4000 N)				ESIN 5 (5000 N)				ESIN 5 (6000 N)
Standard travel	Displacement corrected	Standard force		Standard travel	Displacement corrected	Standard force		Standard travel	Displacement corrected	Standard force		Standard travel	Displacement corrected	Standard force		Standard travel	Displacement corrected	Standard force		Standard travel	Displacement corrected	Standard force		Standard travel	Displacement corrected	Standard force
mm	mm	N		mm	mm	N		mm	mm	N		mm	mm	N		mm	mm	N		mm	mm	N		mm	mm	N
0	-0.0156641	133.83		0	-0.0164323	130.623		0	-0.017877	129.433		0	-0.0190992	127.834		0	-0.0206649	126.227		0	-0.0202578	124.966		0	-0.0187144	126.337
-8.0359e-06	-0.0156722	132.826		-7.53164e-06	-0.0164398	129.542		-8.2612e-07	-0.0178778	128.37		1.68443e-06	-0.0190975	126.785		-2.99335e-06	-0.0206679	125.165		-1.79172e-06	-0.0202596	123.93		6.82354e-06	-0.0187076	125.186
-7.11322e-06	-0.0156712	131.652		-2.25306e-06	-0.0164346	128.526		8.15392e-07	-0.0178762	127.222		-1.8239e-06	-0.019101	125.662		-2.76804e-06	-0.0206676	124.038		-1.93119e-06	-0.0202597	122.835		5.579e-07	-0.0187139	124.131
-1.18661e-05	-0.015676	130.544		-8.38995e-06	-0.0164407	127.408		-2.58565e-06	-0.0178796	126.148		-1.10507e-06	-0.0191003	124.626		-8.43286e-06	-0.0206733	123.014		-4.15206e-06	-0.020262	121.702		4.22716e-06	-0.0187102	123.016
-1.07932e-05	-0.0156749	129.47		-4.88162e-06	-0.0164372	126.376		2.12431e-06	-0.0178749	125.146		-5.90086e-07	-0.0190997	123.512		-4.47392e-06	-0.0206694	121.906		-6.66261e-06	-0.0202645	120.637		4.07696e-07	-0.018714	121.894
-1.16408e-05	-0.0156758	128.455		-4.40955e-06	-0.0164367	125.241		-3.43323e-07	-0.0178773	124.107		0.0014712	-0.0176279	123.468		1.19948e-05	-0.0206529	120.838		0.00252026	-0.0177375	121.8		0.00196459	-0.0167499	122.514
-1.37222e-05	-0.0156779	127.312		0.00251446	-0.0139179	126.466		0.0023971	-0.0154799	125.323		0.00286011	-0.016239	124.719		0.0019662	-0.0186987	121.879		0.0041663	-0.0160915	123.779		0.00345431	-0.0152601	124.218
-2.68221e-06	-0.0156668	126.24		0.00414449	-0.0122878	128.574		0.00397605	-0.0139009	127.201		0.00458308	-0.0145161	126.831		0.00346608	-0.0171988	123.571		0.00514067	-0.0151171	125.105		0.00435255	-0.0143619	125.423
0.00210034	-0.0135638	127.418		0.00511978	-0.0113125	129.994		0.00491428	-0.0129627	128.484		0.00558807	-0.0135111	128.22		0.00437188	-0.016293	124.758		0.00620351	-0.0140543	126.656		0.00534521	-0.0133692	126.867
0.00376963	-0.0118945	129.458		0.00619281	-0.0102395	131.659		0.00596066	-0.0119163	129.994		0.00671143	-0.0123877	129.841		0.00536753	-0.0152973	126.18		0.00735839	-0.0128994	128.42		0.00644573	-0.0122687	128.546
0.00472013	-0.010944	130.857		0.00735697	-0.00907535	133.573		0.00711186	-0.0107651	131.732		0.00792893	-0.0111702	131.684		0.006465	-0.0141999	127.837		0.00863387	-0.0116239	130.392		0.00763735	-0.0110771	130.452
0.00575068	-0.00991345	132.511		0.00862502	-0.0078073	135.721		0.00834511	-0.00953186	133.685		0.00921595	-0.0098832	133.722		0.00766809	-0.0129968	129.718		0.0100033	-0.0102545	132.555		0.00892661	-0.00978784	132.583
0.00687845	-0.00878568	134.418		0.00999486	-0.00643746	138.073		0.0096923	-0.00818468	135.846		0.0106155	-0.00848369	135.939		0.00895008	-0.0117148	131.802		0.0114415	-0.00881633	134.886		0.0103227	-0.00839171	134.908
0.00809094	-0.00757319	136.556		0.0114488	-0.0049835	140.605		0.0111216	-0.00675535	138.185		0.0121302	-0.00696892	138.321		0.0103383	-0.0103265	134.068		0.0129924	-0.00726535	137.358		0.0118051	-0.00690933	137.397
0.00940463	-0.0062595	138.893		0.0130111	-0.00342119	143.294		0.0126505	-0.0052265	140.692		0.0137239	-0.00537526	140.856		0.0118333	-0.00883161	136.484		0.014648	-0.00560981	139.97		0.0133831	-0.00533134	140.033
0.0108246	-0.00483951	141.414		0.0146836	-0.00174874	146.134		0.0142824	-0.00359454	143.343		0.0154031	-0.00369602	143.529		0.0134006	-0.00726431	139.024		0.0164147	-0.00384307	142.712		0.0150644	-0.00365	142.801
0.0123314	-0.00333275	144.094		0.0164323	0	149.119		0.0160332	-0.00184383	146.134		0.0172037	-0.00189549	146.336		0.0150643	-0.00560061	141.674		0.0182852	-0.00197263	145.583		0.0168351	-0.00187937	145.696
0.0139441	-0.00172006	146.934		0.0182739	0.00184154	152.245		0.017877	0	149.057		0.0190992	0	149.284		0.0168389	-0.00382601	144.439		0.0202578	0	148.583		0.0187144	0	148.725
0.0156641	0	149.932		0.0202165	0.00378416	155.515		0.0198355	0.00195851	152.105		0.0211002	0.00200102	152.361		0.0186985	-0.00196635	147.322		0.0223419	0.00208409	151.707		0.0206978	0.0019834	151.877
0.0175068	0.00184266	153.091		0.0222728	0.00584053	158.923		0.0218855	0.0040085	155.294		0.023213	0.00411389	155.563		0.0206649	0	150.321		0.0245305	0.00427274	154.963		0.0227861	0.00407162	155.153
0.0194318	0.00376764	156.399		0.0244317	0.00799941	162.454		0.024025	0.00614805	158.608		0.0254458	0.00634665	158.888		0.0227308	0.00206595	153.417		0.0268131	0.00655534	158.341		0.0249997	0.00628529	158.538
0.0214474	0.00578328	159.873		0.0267159	0.0102835	166.111		0.0262595	0.00838249	162.057		0.0277539	0.00865474	162.336		0.0249198	0.00425488	156.619		0.0291781	0.00892032	161.834		0.0273132	0.00859872	162.036
0.0235691	0.00790497	163.507		0.0290984	0.0126661	169.906		0.0285862	0.0107092	165.643		0.0301288	0.0110296	165.909		0.0272183	0.00655346	159.936		0.0316254	0.0113676	165.444		0.0297132	0.0109988	165.651
0.0257653	0.0101011	167.307		0.0315567	0.0151244	173.844		0.0310191	0.0131421	169.386		0.0326007	0.0135016	169.609		0.0296166	0.00895168	163.361		0.0341667	0.0139089	169.177		0.0321957	0.0134812	169.384
0.0280676	0.0124035	171.285		0.0341171	0.0176848	177.931		0.0335533	0.0156763	173.27		0.0351565	0.0160573	173.424		0.0320889	0.0114241	166.907		0.0368121	0.0165542	173.006		0.034738	0.0160235	173.247
0.0304799	0.0148158	175.417		0.0367675	0.0203352	182.16		0.0361824	0.0183054	177.302		0.0378297	0.0187305	177.349		0.0346224	0.0139576	170.584		0.0395641	0.0193063	176.921		0.0373862	0.0186718	177.247
0.032998	0.0173339	179.706		0.0395251	0.0230928	186.54		0.0389498	0.0210729	181.468		0.0406259	0.0215268	181.384		0.037267	0.0166021	174.385		0.0424392	0.0221814	180.928		0.0401348	0.0214204	181.373
0.0356577	0.0199936	184.144		0.0423844	0.0259521	191.062		0.0418424	0.0239654	185.774		0.0435382	0.0244391	185.528		0.0400276	0.0193627	178.292		0.0454144	0.0251566	185.036		0.0429997	0.0242852	185.597
0.038434	0.0227699	188.725		0.0453647	0.0289324	195.712		0.0448317	0.0269548	190.236		0.0465516	0.0274525	189.801		0.042893	0.0222281	182.297		0.0484692	0.0282114	189.26		0.0459857	0.0272713	189.922
0.0413132	0.0256491	193.472		0.0484659	0.0320336	200.497		0.0478779	0.0300009	194.843		0.0496255	0.0305264	194.214		0.0458936	0.0252287	186.415		0.0516085	0.0313507	193.595		0.0490709	0.0303565	194.348
0.0442351	0.028571	198.394		0.0516595	0.0352271	205.442		0.0510077	0.0331308	199.589		0.0527926	0.0336934	198.776		0.0489848	0.02832	190.677		0.054832	0.0345742	198.043		0.0522392	0.0335247	198.91
0.0472169	0.0315528	203.479		0.0549275	0.0384952	210.542		0.0542215	0.0363446	204.459		0.0560714	0.0369722	203.467		0.0521375	0.0314726	195.095		0.0582096	0.0379518	202.6		0.0554464	0.0367319	203.6
0.0502884	0.0346243	208.723		0.0582436	0.0418113	215.798		0.0575582	0.0396813	209.445		0.059477	0.0403779	208.277		0.0553592	0.0346944	199.662		0.0617078	0.04145	207.258		0.0587325	0.0400181	208.408
0.0535094	0.0378453	214.114		0.0616474	0.045215	221.211		0.0610246	0.0431476	214.544		0.0630189	0.0439197	213.212		0.0587116	0.0380467	204.382		0.0653135	0.0450557	212.019		0.0621698	0.0434553	213.332
0.05685	0.0411858	219.636		0.0652024	0.0487701	226.784		0.0645738	0.0466968	219.77		0.0666723	0.0475731	218.285		0.0622191	0.0415542	209.24		0.0689725	0.0487147	216.909		0.0657687	0.0470543	218.375
0.0602721	0.044608	225.301		0.068881	0.0524487	232.539		0.0681984	0.0503214	225.122		0.070361	0.0512619	223.502		0.0658683	0.0452034	214.22		0.0726916	0.0524338	221.925		0.0694671	0.0507526	223.538
0.0637835	0.0481194	231.113		0.0726568	0.0562245	238.469		0.0719064	0.0540294	230.609		0.0741114	0.0550122	228.879		0.0696139	0.048949	219.342		0.0764963	0.0562385	227.062		0.0732457	0.0545313	228.838
0.0673784	0.0517143	237.079		0.0764805	0.0600481	244.55		0.0757634	0.0578865	236.227		0.077977	0.0588778	234.434		0.0734219	0.052757	224.608		0.080428	0.0601702	232.335		0.077103	0.0583886	234.273
0.0710554	0.0553912	243.199		0.0804276	0.0639953	250.775		0.0797515	0.0618745	241.963		0.0819761	0.0628769	240.171		0.0772963	0.0566314	230.015		0.0844727	0.0642149	237.747		0.0810931	0.0623786	239.842
0.0748471	0.059183	249.46		0.0845389	0.0681066	257.14		0.0838142	0.0659373	247.834		0.0860758	0.0669767	246.07		0.0812526	0.0605878	235.563		0.0885639	0.0683061	243.306		0.0852392	0.0665247	245.549
0.0787883	0.0631242	255.871		0.0887813	0.072349	263.649		0.0879226	0.0700457	253.841		0.0902621	0.0711629	252.099		0.0853307	0.0646658	241.253		0.092732	0.0724742	249.005		0.0895018	0.0707873	251.387
0.0828272	0.0671631	262.454		0.0930488	0.0766165	270.308		0.0921085	0.0742315	259.998		0.0945917	0.0754926	258.261		0.0895337	0.0688688	247.075		0.0970571	0.0767992	254.85		0.0937912	0.0750767	257.359
0.0869401	0.0712759	269.187		0.0973299	0.0808976	277.1		0.0964123	0.0785353	266.326		0.0991045	0.0800053	264.572		0.0937774	0.0731125	253.009		0.101527	0.0812689	260.856		0.098123	0.0794085	263.495
0.0911493	0.0754851	276.055		0.101719	0.0852867	284.043		0.100842	0.0829653	272.834		0.103724	0.084625	271.027		0.0981468	0.0774819	259.043		0.106104	0.0858462	266.999		0.102596	0.0838811	269.821
0.0955053	0.0798412	283.075		0.106278	0.0898454	291.138		0.105326	0.087449	279.51		0.108353	0.0892538	277.612		0.102704	0.082039	265.197		0.110765	0.0905074	273.257		0.107197	0.0884825	276.309
0.100029	0.0843652	290.256		0.110925	0.0944932	298.339		0.109873	0.0919963	286.34		0.112995	0.0938955	284.324		0.107374	0.0867096	271.484		0.115554	0.0952959	279.65		0.111863	0.0931488	282.929
0.104595	0.0889305	297.616		0.115608	0.0991755	305.639		0.114571	0.0966945	293.336		0.117762	0.098663	291.166		0.112062	0.0913968	277.89		0.120486	0.100228	286.198		0.116639	0.0979247	289.647
0.109136	0.093472	305.167		0.120444	0.104011	313.084		0.119433	0.101556	300.516		0.122648	0.103549	298.118		0.116776	0.0961109	284.43		0.125485	0.105227	292.894		0.121614	0.102899	296.504
0.113797	0.0981333	312.935		0.125452	0.10902	320.753		0.124383	0.106506	307.862		0.127604	0.108505	305.158		0.121603	0.100939	291.14		0.130534	0.110276	299.719		0.126733	0.108019	303.525
0.118625	0.102961	320.903		0.130518	0.114086	328.647		0.129392	0.111515	315.349		0.132616	0.113517	312.314		0.126563	0.105898	298.02		0.135669	0.115411	306.665		0.131862	0.113148	310.673
0.123514	0.10785	329.011		0.135622	0.11919	336.718		0.13453	0.116653	323.006		0.137786	0.118687	319.642		0.131572	0.110907	305.038		0.14096	0.120702	313.743		0.136979	0.118264	317.959
0.128496	0.112832	337.221		0.140853	0.124421	344.946		0.139837	0.12196	330.857		0.143093	0.123994	327.179		0.136677	0.116012	312.189		0.146383	0.126125	320.935		0.142212	0.123497	325.387
0.133709	0.118045	345.584		0.146315	0.129883	353.346		0.145219	0.127342	338.881		0.148457	0.129358	334.893		0.141944	0.121279	319.486		0.151906	0.131648	328.26		0.147575	0.128861	332.918
0.13904	0.123375	354.12		0.151888	0.135455	361.89		0.150639	0.132762	347.059		0.153925	0.134826	342.774		0.147362	0.126697	326.932		0.157549	0.137291	335.734		0.152958	0.134244	340.539
0.144342	0.128678	362.818		0.157475	0.141042	370.58		0.156178	0.138301	355.388		0.159567	0.140467	350.832		0.15286	0.132195	334.532		0.163265	0.143007	343.346		0.158461	0.139747	348.31
0.149656	0.133992	371.68		0.163118	0.146686	379.463		0.161875	0.143998	363.882		0.165288	0.146189	359.068		0.158483	0.137818	342.297		0.168973	0.148715	351.068		0.164163	0.145449	356.277
0.155104	0.139439	380.707		0.168878	0.152445	388.525		0.167701	0.149824	372.535		0.171061	0.151962	367.485		0.164207	0.143542	350.247		0.174807	0.15455	358.9		0.169887	0.151172	364.439
0.160692	0.145028	389.865		0.174719	0.158287	397.747		0.173638	0.155761	381.361		0.176957	0.157858	376.093		0.169964	0.149299	358.365		0.1808	0.160543	366.835		0.175659	0.156944	372.775
0.166321	0.150657	399.153		0.180711	0.164279	407.08		0.17965	0.161773	390.34		0.182965	0.163866	384.874		0.175813	0.155148	366.625		0.186782	0.166525	374.91		0.181668	0.162954	381.263
0.172131	0.156467	408.625		0.186824	0.170392	416.509		0.185671	0.167794	399.469		0.189054	0.169954	393.814		0.181797	0.161132	375.023		0.192805	0.172547	383.14		0.18783	0.169116	389.929
0.178112	0.162448	418.309		0.19295	0.176517	426.096		0.191774	0.173897	408.75		0.19532	0.176221	402.908		0.187934	0.167269	383.569		0.19898	0.178722	391.498		0.194037	0.175323	398.781
0.184103	0.168439	428.201		0.199142	0.18271	435.888		0.198027	0.18015	418.166		0.2017	0.1826	412.136		0.194172	0.173508	392.28		0.205281	0.185023	399.995		0.200316	0.181601	407.812
0.190211	0.174546	438.267		0.20543	0.188998	445.885		0.204296	0.186419	427.743		0.208084	0.188985	421.556		0.200494	0.179829	401.159		0.211726	0.191468	408.633		0.206686	0.187971	417.029
0.196521	0.180857	448.491		0.211767	0.195335	456.08		0.210593	0.192716	437.497		0.214544	0.195445	431.182		0.206879	0.186215	410.185		0.218379	0.198121	417.461		0.213175	0.194461	426.41
0.202929	0.187265	458.878		0.218217	0.201784	466.46		0.21704	0.199163	447.404		0.221125	0.202026	441.004		0.213293	0.192628	419.35		0.225062	0.204804	426.522		0.219851	0.201137	435.9
0.209397	0.193733	469.418		0.224872	0.20844	476.994		0.223624	0.205747	457.459		0.227759	0.20866	451.019		0.219832	0.199167	428.652		0.231748	0.211491	435.781		0.226601	0.207886	445.504
0.215944	0.20028	480.089		0.231653	0.215221	487.727		0.230359	0.212482	467.703		0.234524	0.215424	461.175		0.226476	0.205811	438.099		0.238585	0.218327	445.184		0.233407	0.214692	455.276
0.222553	0.206889	490.91		0.238552	0.22212	498.675		0.237305	0.219428	478.163		0.241472	0.222373	471.459		0.233151	0.212486	447.728		0.245598	0.22534	454.741		0.240286	0.221571	465.216
0.229285	0.213621	501.86		0.245569	0.229137	509.839		0.244253	0.226376	488.873		0.248519	0.22942	481.924		0.239933	0.219268	457.503		0.252856	0.232598	464.439		0.247184	0.228469	475.319
0.236115	0.220451	512.903		0.252636	0.236204	521.229		0.251222	0.233345	499.784		0.255686	0.236587	492.603		0.24684	0.226176	467.41		0.260157	0.239899	474.271		0.254145	0.235431	485.579
0.242971	0.227307	524.076		0.259804	0.243372	532.789		0.258323	0.240446	510.851		0.262905	0.243806	503.485		0.253923	0.233258	477.499		0.267352	0.247094	484.239		0.261317	0.242602	495.948
0.249916	0.234251	535.426		0.267162	0.25073	544.521		0.265648	0.247772	522.081		0.270086	0.250987	514.566		0.261256	0.240591	487.797		0.274649	0.254391	494.371		0.268604	0.249889	506.451
0.256932	0.241268	546.961		0.274648	0.258216	556.405		0.273215	0.255338	533.458		0.277413	0.258314	525.828		0.268588	0.247923	498.326		0.282027	0.26177	504.702		0.275984	0.25727	517.135
0.264035	0.248371	558.674		0.282218	0.265785	568.407		0.280735	0.262858	544.965		0.284963	0.265864	537.273		0.275915	0.25525	509.047		0.289547	0.269289	515.186		0.283458	0.264744	528.014
0.271273	0.255609	570.547		0.289763	0.27333	580.537		0.288174	0.270297	556.617		0.292675	0.273575	548.86		0.283389	0.262724	519.931		0.297151	0.276893	525.78		0.290948	0.272234	539.106
0.278688	0.263024	582.598		0.297401	0.280969	592.851		0.295721	0.277844	568.502		0.300419	0.28132	560.583		0.291073	0.270408	530.987		0.304817	0.284559	536.517		0.298534	0.27982	550.406
0.286272	0.270608	594.863		0.305155	0.288723	605.371		0.303375	0.285498	580.606		0.308167	0.289067	572.499		0.298988	0.278323	542.216		0.312685	0.292427	547.461		0.306325	0.287611	561.872
0.293997	0.278333	607.337		0.312872	0.29644	618.055		0.31119	0.293313	592.85		0.316056	0.296957	584.673		0.306831	0.286166	553.589		0.320682	0.300425	558.612		0.314299	0.295585	573.464
0.301728	0.286064	620.008		0.320668	0.304236	630.88		0.319022	0.301145	605.211		0.323994	0.304894	597.07		0.314585	0.29392	565.139		0.328797	0.308539	569.942		0.322365	0.303651	585.216
0.309545	0.29388	632.856		0.328625	0.312193	643.9		0.327051	0.309174	617.769		0.332017	0.312918	609.625		0.322405	0.30174	576.932		0.336923	0.316665	581.443		0.330472	0.311757	597.17
0.317571	0.301907	645.866		0.336859	0.320427	657.202		0.335254	0.317377	630.585		0.340126	0.321027	622.354		0.330415	0.309751	588.948		0.345184	0.324926	593.169		0.338665	0.319951	609.382
0.325757	0.310093	658.955		0.34518	0.328748	670.708		0.343528	0.325651	643.617		0.348458	0.329359	635.341		0.338562	0.317897	601.118		0.353623	0.333365	605.138		0.346877	0.328163	621.787
0.333973	0.318309	672.129		0.353476	0.337044	684.364		0.35185	0.333973	656.851		0.356964	0.337865	648.538		0.346719	0.326054	613.421		0.362102	0.341844	617.291		0.355228	0.336514	634.336
0.342141	0.326477	685.442		0.361876	0.345443	698.221		0.360278	0.342401	670.296		0.365431	0.346331	661.838		0.355063	0.334398	625.942		0.370611	0.350353	629.607		0.363712	0.344998	647.103
0.350441	0.334776	698.942		0.370605	0.354172	712.294		0.368921	0.351044	684.011		0.373921	0.354822	675.312		0.363607	0.342942	638.701		0.379181	0.358923	642.078		0.372428	0.353713	660.121
0.358736	0.343072	712.574		0.379515	0.363082	726.543		0.377618	0.359741	697.934		0.3827	0.363601	689.002		0.372279	0.351614	651.682		0.387949	0.367691	654.729		0.381182	0.362467	673.292
0.367118	0.351454	726.318		0.388256	0.371824	740.933		0.386319	0.368442	712.019		0.391724	0.372625	702.897		0.380963	0.360298	664.859		0.396902	0.376644	667.568		0.389849	0.371134	686.574
0.375623	0.359959	740.23		0.396975	0.380542	755.539		0.395059	0.377182	726.25		0.400562	0.381463	716.955		0.389824	0.369159	678.263		0.405964	0.385707	680.618		0.398646	0.379932	700.046
0.384374	0.36871	754.364		0.405819	0.389386	770.378		0.403964	0.386087	740.648		0.409423	0.390323	731.253		0.398797	0.378132	691.926		0.415013	0.394755	693.912		0.407775	0.38906	713.74
0.393234	0.37757	768.646		0.414854	0.398422	785.357		0.413083	0.395206	755.249		0.418431	0.399332	745.836		0.407838	0.387173	705.776		0.424066	0.403809	707.473		0.416964	0.398249	727.614
0.402094	0.386429	783.021		0.423919	0.407487	800.435		0.422308	0.404431	770.053		0.427621	0.408522	760.612		0.416877	0.396212	719.76		0.433304	0.413046	721.243		0.425964	0.40725	741.661
0.411107	0.395443	797.547		0.433174	0.416742	815.679		0.431557	0.41368	785.101		0.436859	0.41776	775.507		0.425935	0.40527	733.896		0.442757	0.422499	735.132		0.435053	0.416339	756.014
0.420463	0.404799	812.218		0.442584	0.426152	831.133		0.44078	0.422903	800.4		0.446312	0.427212	790.592		0.43518	0.414515	748.24		0.452264	0.432006	749.188		0.444397	0.425683	770.65
0.429871	0.414207	826.999		0.452055	0.435623	846.738		0.450183	0.432306	815.914		0.455977	0.436878	805.939		0.444576	0.423911	762.816		0.461792	0.441534	763.497		0.453904	0.435189	785.429
0.439121	0.423457	841.929		0.461613	0.445181	862.446		0.459827	0.44195	831.54		0.465635	0.446536	821.476		0.454038	0.433373	777.646		0.471422	0.451164	778.076		0.463451	0.444736	800.297
0.448423	0.432759	857.063		0.471381	0.454949	878.234		0.469547	0.45167	847.269		0.475291	0.456192	837.194		0.463464	0.442799	792.737		0.481046	0.460788	792.886		0.473242	0.454528	815.332
0.457868	0.442204	872.333		0.481218	0.464785	894.093		0.479261	0.461384	863.186		0.485192	0.466092	853.112		0.473057	0.452392	808.044		0.490746	0.470488	807.928		0.483226	0.464512	830.564
0.46734	0.451676	887.637		0.490983	0.474551	909.989		0.489067	0.47119	879.291		0.495124	0.476025	869.203		0.482926	0.462261	823.475		0.500746	0.480489	823.161		0.493144	0.47443	845.943
0.477003	0.461338	902.956		0.500704	0.484272	925.956		0.498883	0.481006	895.572		0.504945	0.485846	885.346		0.492886	0.472221	839.016		0.510867	0.49061	838.453		0.503078	0.484364	861.46
0.486931	0.471267	918.35		0.510461	0.494029	942.055		0.508688	0.490811	912.024		0.514718	0.495618	901.507		0.50286	0.482195	854.737		0.520787	0.500529	853.782		0.513023	0.494309	877.133
0.49688	0.481216	933.815		0.520258	0.503826	958.241		0.5187	0.500823	928.58		0.524692	0.505593	917.768		0.512897	0.492233	870.606		0.530751	0.510493	869.196		0.522888	0.504173	892.89
0.506761	0.491097	949.321		0.530187	0.513755	974.452		0.528795	0.510918	945.095		0.534825	0.515725	934.14		0.522825	0.50216	886.63		0.540969	0.520711	884.734		0.53268	0.513965	908.607
0.516793	0.501129	964.412		0.540252	0.52382	990.732		0.538704	0.520827	961.565		0.544872	0.525773	950.562		0.532758	0.512093	902.834		0.550949	0.530691	900.385		0.542525	0.52381	924.359
0.526885	0.511221	978.035		0.550454	0.534022	1007.06		0.548706	0.530829	978.053		0.554777	0.535678	967.043		0.542898	0.522233	919.16		0.560772	0.540514	916.132		0.552544	0.53383	940.222
0.536839	0.521175	989.673		0.560676	0.544244	1023.37		0.558944	0.541067	994.616		0.564789	0.545689	983.567		0.552958	0.532293	935.487		0.570678	0.55042	931.936		0.56262	0.543905	956.172
0.546653	0.530989	999.32		0.570741	0.554308	1039.72		0.568902	0.551025	1011.26		0.574912	0.555813	1000.08		0.562804	0.542139	951.787		0.580649	0.560392	947.76		0.572653	0.553938	972.198
0.555013	0.539349	1007.08		0.58077	0.564337	1056.16		0.578709	0.560833	1027.98		0.584968	0.565869	1016.58		0.572772	0.552107	968.14		0.590593	0.570335	963.607		0.582708	0.563994	988.298
0.559098	0.543434	1012.96		0.590806	0.574374	1072.6		0.588636	0.570759	1044.74		0.594914	0.575815	1033.13		0.582999	0.562334	984.627		0.600722	0.580465	979.479		0.592923	0.574209	1004.41
0.560374	0.54471	1016.94		0.600684	0.584252	1088.97		0.598613	0.580736	1061.49		0.604804	0.585705	1049.75		0.592916	0.572251	1001.26		0.610887	0.590629	995.438		0.603082	0.584368	1020.48
0.561212	0.545547	1019.02		0.610519	0.594086	1105.3		0.608585	0.590708	1078.22		0.614623	0.595524	1066.46		0.602709	0.582044	1018.03		0.620847	0.600589	1011.46		0.613049	0.594334	1036.58
0.562458	0.546794	1017.66		0.620645	0.604213	1121.58		0.618721	0.600844	1094.96		0.624481	0.605382	1083.31		0.6126	0.591935	1034.94		0.630869	0.610612	1027.58		0.623038	0.604323	1052.75
0.562729	0.547064	1014.7		0.630814	0.614382	1137.71		0.628893	0.611016	1111.77		0.634572	0.615473	1100.26		0.622595	0.60193	1051.91		0.640987	0.620729	1043.8		0.632882	0.614168	1068.95
0.562879	0.547215	1011.43		0.640695	0.624262	1153.63		0.63885	0.620973	1128.64		0.644696	0.625597	1117.23		0.632605	0.61194	1068.9		0.650951	0.630693	1060.04		0.642666	0.623952	1085.24
0.562975	0.547311	1008.29		0.650699	0.634266	1169.46		0.648908	0.631032	1145.59		0.654673	0.635573	1134.21		0.642755	0.62209	1085.91		0.660753	0.640496	1076.23		0.652609	0.633894	1101.62
0.563021	0.547356	1005.26		0.660959	0.644526	1185.3		0.658986	0.641109	1162.63		0.664793	0.645694	1151.28		0.652925	0.63226	1103.01		0.670675	0.650417	1092.47		0.662724	0.644009	1118.02
0.563055	0.547391	1002.29		0.67092	0.654488	1201.13		0.668902	0.651025	1179.69		0.675088	0.655989	1168.46		0.662942	0.642277	1120.19		0.680748	0.66049	1108.84		0.672683	0.653969	1134.38
0.56307	0.547406	999.414		0.680685	0.664253	1216.89		0.678713	0.660836	1196.67		0.68508	0.665981	1185.75		0.672943	0.652278	1137.48		0.690814	0.670556	1125.29		0.682631	0.663917	1150.73
0.563076	0.547412	996.638		0.690565	0.674133	1232.6		0.688637	0.67076	1213.68		0.694887	0.675788	1203.16		0.682952	0.662287	1154.88		0.700756	0.680499	1141.79		0.692897	0.674182	1167.14
0.563078	0.547414	993.965		0.700549	0.684117	1248.23		0.698763	0.680886	1230.78		0.70478	0.685681	1220.68		0.692854	0.67219	1172.32		0.710734	0.690476	1158.38		0.70306	0.684346	1183.64
0.563082	0.547418	991.398		0.710578	0.694146	1263.74		0.708851	0.690974	1247.93		0.714645	0.695546	1238.26		0.702586	0.681921	1189.72		0.720882	0.700625	1175.03		0.712978	0.694263	1200.24
0.563074	0.54741	988.93		0.7207	0.704267	1279.12		0.718807	0.70093	1265.12		0.724512	0.705413	1255.85		0.712417	0.691752	1207.16		0.730969	0.710711	1191.68		0.722829	0.704114	1216.9
0.563072	0.547407	986.548		0.730841	0.714409	1294.45		0.728769	0.710892	1282.3		0.734588	0.715489	1273.46		0.722478	0.701813	1224.76		0.740875	0.720618	1208.41		0.732748	0.714034	1233.6
0.563069	0.547405	984.247		0.740853	0.72442	1309.75		0.738882	0.721005	1299.34		0.744733	0.725634	1291.15		0.732625	0.71196	1242.45		0.750791	0.730533	1225.24		0.742621	0.723906	1250.29
				0.750935	0.734503	1325		0.74897	0.731093	1316.2		0.754755	0.735656	1308.93		0.742648	0.721983	1260.23		0.760663	0.740406	1242.15		0.75265	0.733935	1266.95
				0.760983	0.74455	1340.18		0.758918	0.741041	1332.98		0.764851	0.745752	1326.8		0.752681	0.732016	1278.1		0.770522	0.750264	1259.19		0.762754	0.74404	1283.66
				0.770898	0.754466	1355.22		0.768787	0.75091	1349.75		0.774968	0.755869	1344.77		0.7629	0.742235	1295.99		0.780546	0.760288	1276.36		0.772703	0.753989	1300.47
				0.780741	0.764309	1370.08		0.778467	0.76059	1366.6		0.785007	0.765908	1362.76		0.773056	0.752391	1313.86		0.790683	0.770425	1293.55		0.782714	0.763999	1317.45
				0.790661	0.774229	1384.87		0.788045	0.770168	1383.54		0.794864	0.775765	1380.68		0.783037	0.762372	1331.79		0.800685	0.780427	1310.75		0.792802	0.774088	1334.61
				0.80072	0.784287	1399.62		0.797887	0.78001	1400.53		0.804786	0.785687	1398.63		0.79303	0.772365	1349.78		0.810719	0.790461	1328.01		0.802826	0.784111	1351.85
				0.810805	0.794372	1414.3		0.807994	0.790117	1417.42		0.814804	0.795705	1416.69		0.802826	0.782161	1367.85		0.821025	0.800767	1345.36		0.812726	0.794011	1369.02
				0.820756	0.804324	1428.93		0.818128	0.800251	1434.2		0.824755	0.805656	1434.81		0.812577	0.791912	1386.01		0.831101	0.810843	1362.82		0.822681	0.803966	1386.18
				0.830741	0.814309	1443.47		0.82841	0.810533	1450.97		0.834613	0.815514	1453.04		0.822585	0.801921	1404.27		0.840931	0.820673	1380.38		0.832803	0.814088	1403.44
				0.840878	0.824446	1457.74		0.838839	0.820962	1467.8		0.844531	0.825432	1471.36		0.832708	0.812043	1422.52		0.85081	0.830552	1398.06		0.842928	0.824214	1420.77
				0.850983	0.834551	1470.76		0.848967	0.83109	1484.7		0.854643	0.835544	1489.7		0.842652	0.821987	1440.74		0.860741	0.840483	1415.82		0.85286	0.834145	1438.16
				0.860926	0.844494	1481.78		0.858849	0.840972	1501.64		0.864726	0.845627	1508.06		0.852668	0.832003	1459		0.870606	0.850348	1433.58		0.862759	0.844044	1455.66
				0.870799	0.854367	1490.74		0.868747	0.85087	1518.54		0.874767	0.855667	1526.49		0.862968	0.842303	1477.38		0.880624	0.860367	1451.31		0.872845	0.85413	1473.2
				0.880218	0.863785	1497.73		0.878657	0.86078	1535.28		0.884852	0.865753	1544.95		0.873057	0.852392	1495.89		0.890747	0.870489	1469.12		0.882931	0.864216	1490.66
				0.886349	0.869917	1502.74		0.888486	0.870609	1551.81		0.894793	0.875693	1563.46		0.882931	0.862266	1514.51		0.900784	0.880527	1487.01		0.892837	0.874122	1508.1
				0.888644	0.872211	1505.73		0.898561	0.880684	1568.18		0.904747	0.885648	1582.06		0.892801	0.872136	1533.19		0.910854	0.890596	1505.02		0.902854	0.88414	1525.62
				0.889714	0.873282	1506.75		0.908724	0.890847	1584.45		0.914915	0.895816	1600.71		0.902727	0.882062	1551.92		0.920963	0.900705	1523.19		0.912852	0.894137	1543.26
				0.891235	0.874803	1503.07		0.918731	0.900854	1600.63		0.924953	0.905854	1619.28		0.912627	0.891962	1570.67		0.930968	0.91071	1541.45		0.922706	0.903992	1561.01
				0.891603	0.875171	1498.66		0.92881	0.910933	1616.79		0.934785	0.915686	1637.72		0.922681	0.902017	1589.43		0.940825	0.920567	1559.66		0.932605	0.913891	1578.9
				0.891803	0.875371	1493.59		0.93897	0.921093	1632.97		0.944762	0.925662	1656.12		0.93277	0.912105	1608.3		0.950717	0.93046	1577.9		0.942758	0.924044	1596.81
				0.891928	0.875495	1488.64		0.949009	0.931132	1649.08		0.954998	0.935899	1674.57		0.942693	0.922028	1627.29		0.960757	0.9405	1596.25		0.952774	0.934059	1614.65
				0.892004	0.875572	1483.9		0.95885	0.940973	1664.97		0.964931	0.945832	1693.03		0.952705	0.93204	1646.48		0.970783	0.950525	1614.72		0.96269	0.943975	1632.45
				0.892052	0.87562	1479.31		0.968749	0.950872	1680.75		0.974723	0.955624	1711.45		0.962807	0.942143	1665.86		0.980685	0.960428	1633.33		0.972874	0.95416	1650.34
				0.892077	0.875644	1474.88		0.978813	0.960936	1696.51		0.98463	0.965531	1729.78		0.972786	0.952122	1685.31		0.990578	0.97032	1652.15		0.982991	0.964276	1668.38
				0.892094	0.875661	1470.64		0.988813	0.970936	1712.25		0.994625	0.975526	1748		0.982673	0.962008	1704.66		1.00064	0.980379	1671.07		0.992816	0.974102	1686.56
				0.892098	0.875665	1466.57		0.998675	0.980798	1727.97		1.00462	0.985519	1766.09		0.992673	0.972008	1724.03		1.01072	0.990461	1690.04		1.00262	0.983908	1704.8
				0.892099	0.875667	1462.68		1.00857	0.99069	1743.71		1.01466	0.995559	1784.1		1.00283	0.982168	1743.54		1.02071	1.00045	1709.1		1.01262	0.993904	1723.06
				0.892095	0.875663	1458.94		1.01864	1.00077	1759.41		1.02455	1.00545	1802.15		1.01294	0.992273	1763.15		1.03081	1.01056	1728.28		1.0226	1.00388	1741.33
				0.892091	0.875659	1455.36		1.02875	1.01087	1774.98		1.03435	1.01525	1820.2		1.02285	1.00219	1782.87		1.04081	1.02055	1747.59		1.03266	1.01395	1759.57
								1.03877	1.0209	1790.49		1.04432	1.02523	1838.25		1.03274	1.01207	1802.73		1.05071	1.03046	1767.04		1.04282	1.0241	1777.88
								1.04887	1.03099	1806		1.05438	1.03529	1856.29		1.0428	1.02214	1822.63		1.06077	1.04051	1786.64		1.05284	1.03413	1796.28
								1.05881	1.04093	1821.49		1.06446	1.04536	1874.3		1.05288	1.03222	1842.46		1.07092	1.05066	1806.22		1.06283	1.04412	1814.76
								1.06869	1.05082	1836.98		1.07436	1.05527	1892.21		1.06285	1.04218	1862.33		1.08087	1.06061	1825.72		1.07294	1.05422	1833.33
								1.0788	1.06092	1852.47		1.08428	1.06518	1910.17		1.07286	1.0522	1882.35		1.09076	1.07051	1845.18		1.08298	1.06426	1851.92
								1.08897	1.07109	1867.84		1.09439	1.07529	1928.2		1.08278	1.06211	1902.54		1.10096	1.0807	1864.74		1.09285	1.07414	1870.46
								1.09885	1.08098	1882.99		1.10457	1.08547	1946.23		1.09261	1.07195	1922.9		1.11099	1.09073	1884.4		1.10269	1.08397	1888.99
								1.10873	1.09086	1898.01		1.11464	1.09554	1964.18		1.1026	1.08193	1943.45		1.12075	1.10049	1904.17		1.1127	1.09399	1907.64
								1.11896	1.10109	1913.03		1.12465	1.10555	1982		1.11277	1.09211	1964.03		1.13057	1.11031	1924.04		1.12278	1.10406	1926.42
								1.12899	1.11111	1928.06		1.13486	1.11576	1999.67		1.12276	1.1021	1984.56		1.14063	1.12037	1943.96		1.13279	1.11408	1945.29
								1.13876	1.12088	1943.07		1.14503	1.12593	2017.17		1.13269	1.11203	2005.07		1.15063	1.13038	1963.87		1.14275	1.12404	1964.33
								1.14858	1.13071	1957.89		1.155	1.1359	2034.57		1.14291	1.12224	2025.71		1.16072	1.14046	1983.72		1.1528	1.13409	1983.49
								1.15862	1.14074	1971.33		1.16494	1.14584	2051.85		1.15299	1.13232	2046.48		1.17088	1.15063	2003.65		1.16291	1.1442	2002.74
								1.16862	1.15075	1982.43		1.17476	1.15566	2069.05		1.1628	1.14214	2067.37		1.18092	1.16067	2023.7		1.17289	1.15417	2022.15
								1.17874	1.16086	1991.05		1.18459	1.16549	2086.24		1.17264	1.15198	2088.31		1.19094	1.17068	2043.83		1.18285	1.16413	2041.78
								1.18852	1.17064	1997.46		1.19461	1.17551	2103.38		1.18264	1.16198	2109.29		1.20092	1.18066	2064.02		1.19273	1.17402	2061.6
								1.1948	1.17692	2001.75		1.20468	1.18558	2120.33		1.19259	1.17192	2130.26		1.21084	1.19058	2084.27		1.20257	1.18386	2081.68
								1.19695	1.17907	2003.86		1.21462	1.19552	2137.09		1.20265	1.18198	2151.17		1.2207	1.20044	2104.45		1.2125	1.19379	2102.07
								1.19786	1.17998	2003.8		1.22468	1.20558	2153.75		1.21281	1.19214	2172.08		1.23053	1.21027	2124.61		1.22266	1.20394	2122.63
								1.19869	1.18081	2001.57		1.235	1.2159	2170.33		1.22284	1.20217	2193.04		1.2405	1.22025	2144.89		1.2327	1.21398	2143.31
								1.1993	1.18142	1997.16		1.24504	1.22594	2186.83		1.23288	1.21222	2214.09		1.25061	1.23035	2165.31		1.24268	1.22397	2164.11
								1.19965	1.18178	1990.81		1.25492	1.23582	2203.29		1.24298	1.22232	2235.2		1.26068	1.24042	2185.86		1.25292	1.2342	2185.12
								1.19984	1.18197	1983.77		1.26484	1.24574	2219.7		1.25296	1.23229	2256.33		1.27071	1.25045	2206.55		1.26311	1.24439	2206.36
								1.19996	1.18209	1976.98		1.27472	1.25562	2235.98		1.26279	1.24212	2277.35		1.28088	1.26062	2227.3		1.27301	1.2543	2227.84
								1.20003	1.18215	1970.55		1.28453	1.26543	2252.08		1.27268	1.25201	2298.34		1.29105	1.27079	2248.13		1.28283	1.26411	2249.57
								1.20007	1.1822	1964.36		1.29461	1.27551	2268.01		1.28269	1.26203	2319.4		1.30104	1.28078	2269.08		1.29276	1.27404	2271.5
								1.2001	1.18222	1958.41		1.30475	1.28565	2283.87		1.29278	1.27211	2340.54		1.31101	1.29075	2290.19		1.30262	1.28391	2293.54
								1.20011	1.18223	1952.71		1.3147	1.2956	2299.68		1.30278	1.28211	2361.73		1.32084	1.30058	2311.47		1.3126	1.29388	2315.65
								1.20011	1.18223	1947.26		1.32472	1.30562	2315.54		1.3127	1.29204	2383		1.33064	1.31039	2333		1.32273	1.30401	2337.9
								1.2001	1.18223	1942.04		1.33483	1.31573	2331.46		1.3228	1.30213	2404.3		1.34058	1.32032	2354.83		1.3328	1.31408	2360.29
								1.20011	1.18223	1937.04		1.34479	1.3257	2347.28		1.33293	1.31227	2425.56		1.3507	1.33045	2376.8		1.34283	1.32411	2382.88
								1.2001	1.18222	1932.24		1.35464	1.33554	2362.84		1.34288	1.32222	2446.86		1.36066	1.34041	2398.85		1.35293	1.33422	2405.71
								1.2001	1.18222	1927.61		1.36466	1.34556	2378.26		1.3528	1.33214	2468.18		1.37062	1.35036	2420.91		1.36298	1.34426	2428.69
								1.20009	1.18222	1923.15		1.37487	1.35577	2393.61		1.36268	1.34201	2489.4		1.38089	1.36063	2442.93		1.37285	1.35414	2451.53
												1.38495	1.36585	2408.81		1.37257	1.35191	2510.58		1.39105	1.37079	2464.9		1.38272	1.36401	2474.09
												1.39484	1.37574	2423.92		1.38251	1.36184	2531.79		1.40095	1.38069	2487.11		1.39276	1.37405	2496.47
												1.40477	1.38567	2438.98		1.3926	1.37193	2553.01		1.41075	1.3905	2509.73		1.40282	1.38411	2518.85
												1.41489	1.39579	2453.95		1.40243	1.38176	2574.29		1.4204	1.40015	2532.62		1.41269	1.39398	2541.46
												1.42494	1.40584	2468.7		1.41212	1.39146	2595.68		1.42976	1.4095	2555.59		1.42232	1.40361	2564.41
												1.43484	1.41574	2483.37		1.42217	1.4015	2617.15		1.43958	1.41932	2578.62		1.43196	1.41324	2587.51
												1.44483	1.42573	2498.1		1.43229	1.41162	2638.7		1.45005	1.42979	2601.82		1.4417	1.42299	2610.55
												1.45478	1.43568	2512.9		1.44238	1.42172	2660.39		1.46034	1.44008	2625.21		1.45185	1.43314	2633.59
												1.4646	1.4455	2527.78		1.45249	1.43183	2682.26		1.47042	1.45016	2648.99		1.46232	1.44361	2656.76
												1.47458	1.45548	2542.81		1.46251	1.44184	2704.32		1.48059	1.46033	2673.35		1.47259	1.45388	2680.13
												1.48479	1.4657	2557.92		1.47238	1.45171	2726.52		1.49069	1.47043	2698.19		1.48252	1.4638	2703.82
												1.49476	1.47566	2572.93		1.48246	1.46179	2748.75		1.5006	1.48035	2722.97		1.49249	1.47378	2727.94
												1.50468	1.48558	2587.92		1.49268	1.47201	2770.91		1.51056	1.4903	2747.54		1.50276	1.48405	2752.22
												1.51494	1.49584	2603		1.50268	1.48202	2792.9		1.52071	1.50046	2772.18		1.51284	1.49413	2776.24
												1.525	1.5059	2618.21		1.51274	1.49208	2814.78		1.53091	1.51065	2796.92		1.52271	1.50399	2799.94
												1.53478	1.51568	2633.46		1.52289	1.50223	2836.7		1.54089	1.52063	2821.72		1.53282	1.5141	2823.65
												1.5446	1.5255	2648.73		1.53293	1.51226	2858.52		1.55074	1.53048	2846.69		1.54302	1.52431	2847.52
												1.55464	1.53554	2664.05		1.54276	1.52209	2879.96		1.5608	1.54054	2871.7		1.55285	1.53413	2871.53
												1.56462	1.54552	2679.32		1.5526	1.53194	2901.08		1.57087	1.55061	2896.57		1.56259	1.54387	2895.61
												1.57466	1.55556	2694.5		1.56269	1.54203	2922.02		1.58076	1.5605	2921.3		1.57256	1.55384	2919.8
												1.5848	1.56571	2709.67		1.57277	1.55211	2942.73		1.5908	1.57054	2946.08		1.5826	1.56388	2943.99
												1.59487	1.57577	2724.95		1.58267	1.562	2963.15		1.60082	1.58057	2970.94		1.59266	1.57395	2968.03
												1.60496	1.58586	2740.34		1.59255	1.57189	2983.34		1.61067	1.59041	2995.85		1.60281	1.5841	2992.05
												1.61499	1.59589	2755.77		1.60263	1.58197	3003.18		1.62055	1.60029	3020.86		1.61296	1.59424	3016.21
												1.62493	1.60583	2771.23		1.61276	1.5921	3022.63		1.63076	1.6105	3045.87		1.62299	1.60428	3040.45
												1.6348	1.6157	2786.6		1.62273	1.60206	3041.7		1.6408	1.62054	3070.68		1.63293	1.61421	3064.74
												1.64469	1.62559	2801.94		1.63279	1.61212	3060.53		1.65063	1.63037	3095.25		1.64281	1.62409	3089.08
												1.65469	1.63559	2817.32		1.64281	1.62215	3079.14		1.66079	1.64053	3119.81		1.65272	1.634	3113.35
												1.66476	1.64566	2832.78		1.65269	1.63203	3097.51		1.671	1.65075	3144.49		1.66255	1.64384	3137.53
												1.67478	1.65568	2848.32		1.66265	1.64199	3115.65		1.68085	1.66059	3169.23		1.67242	1.65371	3161.69
												1.68472	1.66562	2863.88		1.67288	1.65221	3133.43		1.69057	1.67032	3193.92		1.6825	1.66378	3185.95
												1.69479	1.67569	2879.39		1.68287	1.66221	3150.76		1.70053	1.68028	3218.6		1.69264	1.67392	3210.3
												1.70495	1.68585	2894.82		1.69273	1.67207	3167.71		1.71056	1.6903	3243.2		1.70266	1.68394	3234.66
												1.71494	1.69584	2910.29		1.70289	1.68223	3184.57		1.72061	1.70035	3267.52		1.71274	1.69402	3258.95
												1.72483	1.70573	2925.75		1.71306	1.6924	3201.28		1.73072	1.71046	3291.66		1.72299	1.70427	3283.22
												1.73465	1.71555	2941.24		1.72286	1.70219	3217.8		1.74082	1.72056	3315.79		1.73309	1.71438	3307.5
												1.74454	1.72544	2956.55		1.73258	1.71192	3234.11		1.75087	1.73062	3339.9		1.74299	1.72428	3331.76
												1.75454	1.73544	2970.19		1.74259	1.72193	3250.21		1.76095	1.7407	3363.93		1.7528	1.73409	3356
												1.76467	1.74557	2980.88		1.75265	1.73199	3266.03		1.77094	1.75068	3387.79		1.76263	1.74392	3380.33
												1.77469	1.75559	2988.5		1.76269	1.74202	3281.51		1.78086	1.7606	3411.43		1.77254	1.75382	3404.83
												1.78429	1.76519	2993.29		1.77283	1.75216	3296.78		1.79071	1.77045	3434.83		1.78259	1.76388	3429.35
												1.79072	1.77162	2995.41		1.78294	1.76228	3311.96		1.80064	1.78038	3458.1		1.79261	1.7739	3453.86
												1.794	1.7749	2991.47		1.79296	1.77229	3327.03		1.81069	1.79043	3481.31		1.80258	1.78386	3478.42
												1.79475	1.77565	2985.49		1.80293	1.78227	3341.94		1.82074	1.80049	3504.48		1.81275	1.79404	3503.06
												1.79532	1.77622	2976.93		1.81285	1.79218	3356.67		1.83068	1.81042	3527.58		1.82297	1.80426	3527.7
												1.79566	1.77657	2966.03		1.8227	1.80204	3371.09		1.8407	1.82044	3550.5		1.8329	1.81419	3552.37
												1.79586	1.77676	2954.29		1.83256	1.8119	3385.23		1.85085	1.83059	3573.25		1.84284	1.82412	3577.12
												1.79597	1.77688	2942.98		1.84252	1.82185	3399.25		1.8609	1.84064	3595.82		1.85281	1.83409	3601.88
												1.79604	1.77694	2932.3		1.85261	1.83194	3413.23		1.87081	1.85055	3618.27		1.86266	1.84394	3626.51
												1.79608	1.77698	2922.12		1.86271	1.84205	3427.12		1.88068	1.86042	3640.54		1.87256	1.85384	3651.02
												1.7961	1.777	2912.39		1.87271	1.85205	3440.8		1.89057	1.87031	3662.72		1.88266	1.86394	3675.49
												1.79611	1.77701	2903.13		1.88281	1.86214	3454.19		1.90054	1.88028	3684.84		1.8927	1.87398	3699.89
												1.79611	1.77701	2894.28		1.89306	1.87239	3467.25		1.91063	1.89037	3706.7		1.90261	1.8839	3724.26
												1.79611	1.77702	2885.83		1.9031	1.88243	3480.05		1.92065	1.9004	3728.21		1.91273	1.89402	3748.77
												1.79611	1.77701	2877.74		1.91301	1.89234	3492.64		1.93067	1.91041	3749.45		1.92287	1.90416	3773.42
												1.7961	1.77701	2870		1.92285	1.90218	3505.08		1.94088	1.92062	3770.56		1.93279	1.91408	3797.95
												1.7961	1.777	2862.56		1.93269	1.91202	3517.44		1.95106	1.9308	3791.46		1.94261	1.9239	3822.25
												1.79609	1.77699	2855.4		1.94261	1.92194	3529.71		1.96097	1.94071	3812.22		1.95268	1.93397	3846.53
												1.79609	1.77699	2848.51		1.95269	1.93202	3541.72		1.97082	1.95056	3832.89		1.96286	1.94415	3870.81
												1.79608	1.77698	2841.86		1.96268	1.94202	3553.45		1.98078	1.96052	3853.39		1.97289	1.95418	3894.98
												1.79607	1.77697	2835.42		1.97265	1.95199	3565.07		1.99064	1.97038	3873.62		1.98278	1.96407	3919.13
												1.79607	1.77697	2829.19		1.98284	1.96218	3576.68		2.00058	1.98032	3893.58		1.99277	1.97406	3943.32
												1.79607	1.77697	2823.16		1.99304	1.97237	3588.28		2.01071	1.99045	3913.36		2.00287	1.98416	3967.34
												1.79606	1.77696	2817.31		2.00295	1.98228	3599.92		2.02078	2.00052	3932.92		2.01283	1.99411	3991.11
												1.79606	1.77696	2811.62		2.01285	1.99219	3611.57		2.03076	2.01051	3952.26		2.02276	2.00404	4014.79
												1.79605	1.77695	2806.08		2.02278	2.00212	3623.11		2.04091	2.02065	3971.49		2.03282	2.01411	4038.45
																2.03259	2.01193	3634.51		2.05098	2.03073	3990.6		2.04271	2.024	4062.04
																2.04257	2.02191	3645.81		2.06085	2.04059	4009.32		2.05252	2.0338	4085.59
																2.05271	2.03205	3657.13		2.07068	2.05042	4027.64		2.06265	2.04393	4109.13
																2.0627	2.04203	3668.51		2.0807	2.06044	4045.75		2.07281	2.0541	4132.45
																2.07263	2.05197	3680.02		2.0908	2.07055	4063.68		2.0827	2.06399	4155.4
																2.0828	2.06214	3691.79		2.10074	2.08048	4081.39		2.0927	2.07399	4178.16
																2.0929	2.07223	3703.77		2.11059	2.09033	4098.97		2.10299	2.08428	4200.91
																2.10276	2.08209	3715.68		2.12062	2.10036	4116.46		2.11295	2.09423	4223.66
																2.11263	2.09196	3727.54		2.13073	2.11047	4133.73		2.12265	2.10394	4246.25
																2.12273	2.10207	3739.63		2.14073	2.12048	4150.67		2.1325	2.11378	4268.72
																2.13292	2.11226	3751.87		2.15078	2.13052	4167.46		2.14251	2.1238	4291.08
																2.14295	2.12229	3764.19		2.16085	2.14059	4184.12		2.15256	2.13384	4313.21
																2.15284	2.13217	3776.67		2.17075	2.1505	4200.66		2.16266	2.14394	4335.06
																2.16283	2.14216	3789.26		2.18064	2.16038	4217.09		2.17279	2.15407	4356.8
																2.1729	2.15223	3801.72		2.19083	2.17057	4233.33		2.18283	2.16411	4378.47
																2.18283	2.16216	3813.98		2.20092	2.18066	4249.21		2.1929	2.17419	4400.04
																2.1928	2.17214	3826.21		2.21076	2.19051	4264.65		2.20291	2.1842	4421.4
																2.20285	2.18218	3838.41		2.22082	2.20056	4279.89		2.21287	2.19415	4442.52
																2.21272	2.19205	3850.54		2.23107	2.21081	4295.09		2.22273	2.20402	4463.35
																2.22258	2.20191	3862.65		2.24095	2.22069	4310.25		2.23264	2.21393	4483.97
																2.23276	2.21209	3874.66		2.25065	2.2304	4325.28		2.24265	2.22394	4504.47
																2.24287	2.22221	3885.83		2.26055	2.2403	4340.2		2.25275	2.23403	4524.87
																2.25271	2.23204	3896.22		2.27057	2.25032	4354.9		2.26275	2.24403	4545.17
																2.26276	2.24209	3906.48		2.28066	2.2604	4369.27		2.27273	2.25401	4565.29
																2.27302	2.25235	3915.31		2.29081	2.27055	4383.37		2.28284	2.26412	4585.21
																2.28293	2.26226	3921.82		2.30097	2.28071	4397.4		2.29294	2.27423	4604.92
																2.29264	2.27198	3928.37		2.311	2.29074	4411.37		2.3029	2.28419	4624.5
																2.30254	2.28187	3935.07		2.32097	2.30071	4425.25		2.31277	2.29406	4643.87
																2.31258	2.29192	3941.88		2.33084	2.31058	4438.98		2.32261	2.30389	4663.07
																2.32264	2.30197	3948.68		2.34074	2.32048	4452.47		2.33253	2.31382	4682.16
																2.33276	2.31209	3955.52		2.35059	2.33033	4465.68		2.3426	2.32389	4701.05
																2.34287	2.32221	3963.07		2.36047	2.34021	4478.75		2.35271	2.33399	4719.56
																2.35291	2.33224	3971.21		2.3705	2.35024	4491.82		2.36271	2.344	4737.66
																2.36298	2.34232	3979.4		2.38064	2.36038	4504.88		2.37278	2.35407	4755.54
																2.37299	2.35232	3987.94		2.3907	2.37044	4517.85		2.38299	2.36428	4773.13
																2.38291	2.36225	3996		2.40074	2.38048	4530.61		2.39299	2.37428	4790.44
																2.39277	2.3721	4000.69		2.41098	2.39072	4543.19		2.40287	2.38416	4807.58
																2.40263	2.38196	4002.22		2.42112	2.40086	4555.63		2.41283	2.39411	4824.54
																2.41062	2.38995	4000.77		2.43106	2.4108	4567.98		2.42271	2.40399	4841.2
																2.41421	2.39355	3996.39		2.44088	2.42062	4580.23		2.43254	2.41382	4857.51
																2.41548	2.39481	3989.2		2.45068	2.43042	4592.46		2.44263	2.42392	4873.51
																2.41635	2.39569	3979.31		2.46055	2.44029	4604.74		2.4528	2.43409	4889.22
																2.41706	2.3964	3966.82		2.47058	2.45032	4616.94		2.46279	2.44408	4904.65
																2.41752	2.39685	3951.8		2.48063	2.46037	4628.99		2.47289	2.45418	4919.95
																2.41777	2.39711	3935.5		2.4906	2.47034	4640.96		2.48302	2.46431	4935.17
																2.41791	2.39725	3919.61		2.50074	2.48048	4652.98		2.49298	2.47427	4950.06
																2.41801	2.39734	3904.63		2.51101	2.49076	4664.96		2.50273	2.48402	4964.41
																2.41806	2.39739	3890.43		2.52098	2.50072	4676.87		2.51266	2.49395	4978.37
																2.41809	2.39742	3876.92		2.53088	2.51062	4688.78		2.52281	2.50409	4992.1
																2.4181	2.39744	3864.09		2.54084	2.52058	4700.65		2.53282	2.5141	5005.52
																2.41811	2.39745	3851.89		2.55069	2.53043	4712.32		2.54266	2.52395	5018.71
																2.41811	2.39745	3840.29		2.56058	2.54032	4723.8		2.55261	2.5339	5031.73
																2.41811	2.39745	3829.24		2.57068	2.55042	4735.18		2.56271	2.54399	5044.45
																2.41811	2.39744	3818.72		2.58075	2.56049	4746.46		2.57274	2.55402	5056.65
																2.4181	2.39744	3808.64		2.59064	2.57038	4757.66		2.58273	2.56402	5068.49
																2.4181	2.39743	3798.99		2.60074	2.58049	4768.96		2.59286	2.57414	5080.08
																2.41809	2.39742	3789.72		2.61089	2.59063	4780.41		2.6028	2.58409	5091.36
																2.41808	2.39742	3780.8		2.62083	2.60058	4791.74		2.61264	2.59393	5102.36
																2.41808	2.39741	3772.2		2.63065	2.61039	4802.82		2.62274	2.60402	5113.07
																2.41808	2.39741	3763.89		2.64068	2.62042	4813.81		2.63292	2.6142	5123.27
																2.41807	2.3974	3755.86		2.65088	2.63062	4824.81		2.6428	2.62409	5132.77
																2.41806	2.3974	3748.08		2.66094	2.64068	4835.69		2.65275	2.63403	5141.65
																				2.67084	2.65058	4846.52		2.66304	2.64433	5150.13
																				2.6808	2.66054	4857.39		2.6731	2.65439	5158.2
																				2.69091	2.67065	4868.13		2.68278	2.66407	5165.77
																				2.70088	2.68062	4878.56		2.69258	2.67387	5172.91
																				2.71078	2.69052	4888.87		2.70261	2.6839	5179.51
																				2.72082	2.70057	4899.17		2.71264	2.69393	5185.37
																				2.73076	2.71051	4909.44		2.72269	2.70398	5190.4
																				2.74058	2.72032	4919.71		2.73287	2.71415	5194.39
																				2.75065	2.7304	4930.04		2.74295	2.72424	5197.39
																				2.76084	2.74058	4940.25		2.75298	2.73427	5199.72
																				2.77076	2.75051	4950.14		2.7629	2.74419	5201.3
																				2.78072	2.76046	4959.9		2.78266	2.76395	5202.21
																				2.79099	2.77073	4969.44		2.80253	2.78381	5200.37
																				2.80102	2.78076	4977.11		2.81267	2.79396	5198.88
																				2.81071	2.79046	4981.54		2.82274	2.80403	5197.04
																				2.82051	2.80026	4982.67		2.8327	2.81398	5195.22
																				2.83015	2.80989	4980.78		2.84286	2.82414	5193.42
																				2.83642	2.81616	4975.84		2.85311	2.8344	5191.4
																				2.83882	2.81856	4967.87		2.86314	2.84443	5189.33
																				2.83987	2.81961	4957.21		2.87301	2.8543	5187.26
																				2.84069	2.82043	4944.03		2.88284	2.86412	5185.25
																				2.84128	2.82103	4928.28		2.89269	2.87397	5183.4
																				2.84164	2.82139	4910.26		2.90267	2.88395	5181.66
																				2.84185	2.82159	4891.72		2.91276	2.89404	5179.88
																				2.84198	2.82172	4873.94		2.92273	2.90402	5178.12
																				2.84205	2.82179	4857.12		2.93273	2.91402	5176.5
																				2.84209	2.82184	4841.1		2.94299	2.92427	5175.04
																				2.84212	2.82186	4825.85		2.95306	2.93434	5173.71
																				2.84213	2.82187	4811.32		2.96298	2.94426	5172.54
																				2.84213	2.82188	4797.48		2.97292	2.9542	5171.45
																				2.84213	2.82187	4784.27		2.98277	2.96405	5170.25
																				2.84213	2.82187	4771.66		2.99257	2.97385	5168.86
																				2.84212	2.82186	4759.6		3.00263	2.98392	5167.16
																				2.84212	2.82186	4748.03		3.01278	2.99406	5163.65
																				2.84211	2.82185	4736.93		3.02272	3.00401	5159.19
																								3.03273	3.01402	5154.3
																								3.04289	3.02418	5149.14
																								3.05291	3.0342	5143.58
																								3.06271	3.044	5137.44
																								3.07266	3.05395	5130.91
																								3.08287	3.06416	5124.19
																								3.09299	3.07427	5117.26
																								3.10291	3.0842	5110.29
																								3.11283	3.09411	5104.96
																								3.12288	3.10416	5100.35
																								3.13293	3.11421	5095.93
																								3.14287	3.12415	5091.7
																								3.1529	3.13419	5087.84
																								3.16288	3.14417	5084.37
																								3.17272	3.154	5081.26
																								3.18266	3.16395	5078.57
																								3.19283	3.17411	5076.17
																								3.20282	3.18411	5073.87
																								3.21268	3.19397	5071.72
																								3.22289	3.20417	5069.95
																								3.23305	3.21434	5068.64
																								3.25254	3.23383	5067.13
																								3.27255	3.25383	5066.43
																								3.28263	3.26392	5066.11
																								3.29281	3.2741	5065.86
																								3.30297	3.28425	5065.75
																								3.31302	3.2943	5065.74
																								3.32302	3.30431	5065.62
																								3.34289	3.32417	5064.73
																								3.36274	3.34403	5062.98
																								3.3728	3.35408	5062.05
																								3.38282	3.36411	5061.09
																								3.39274	3.37403	5060
																								3.40276	3.38404	5058.76
																								3.41292	3.3942	5057.34
																								3.42298	3.40427	5055.88
																								3.43291	3.41419	5054.35
																								3.44272	3.42401	5052.64
																								3.45261	3.43389	5050.72
																								3.46261	3.4439	5048.63
																								3.47268	3.45397	5045.06
																								3.48265	3.46394	5040.38
																								3.49266	3.47394	5035.44
																								3.50291	3.48419	5030.35
																								3.51308	3.49437	5025.03
																								3.52301	3.50429	5019.57
																								3.53288	3.51417	5014.03
																								3.54282	3.52411	5008.38
																								3.55266	3.53395	5002.45
																								3.56265	3.54393	4996.1
																								3.57283	3.55411	4990.52
																								3.58288	3.56417	4985.25
																								3.59288	3.57417	4979.63
																								3.603	3.58428	4973.79
																								3.61307	3.59436	4967.68
																								3.62288	3.60416	4961.08
																								3.6327	3.61398	4954.04
																								3.64277	3.62405	4946.68
																								3.65287	3.63416	4939.16
																								3.66279	3.64408	4931.58
																								3.6727	3.65398	4924.07
																								3.68274	3.66402	4916.62
																								3.69281	3.67409	4908.99
																								3.70276	3.68404	4901.19
																								3.71282	3.6941	4893.33
																								3.72288	3.70417	4885.35
																								3.73281	3.71409	4877.23
																								3.74273	3.72402	4869.15
																								3.75291	3.73419	4861.05
																								3.76295	3.74423	4852.71
																								3.77279	3.75407	4844.16
																								3.78292	3.7642	4835.67
																								3.79314	3.77442	4826.16
																								3.80293	3.78421	4815.25
																								3.81257	3.79386	4803.59
																								3.82255	3.80384	4791.45
																								3.83264	3.81393	4778.94
																								3.84272	3.82401	4766.1
																								3.85288	3.83417	4753.14
																								3.86303	3.84431	4740.4
																								3.87306	3.85435	4727.93
																								3.88305	3.86433	4715.68
																								3.89292	3.87421	4704.94
																								3.90277	3.88405	4695.98
																								3.91263	3.89392	4688.14
																								3.92255	3.90384	4681.33

## Sheet: ESIN 6
ESIN 6 (1000 N)				ESIN 6 (1500 N)				ESIN 6 (2000 N)				ESIN 6 (3000 N)				ESIN 6 (4000 N)				ESIN 6 (5000 N)				ESIN 6 (6000 N)				ESIN 6 (7000 N)
Standard travel	Displacement corrected	Standard force		Standard travel	Displacement corrected	Standard force		Standard travel	Displacement corrected	Standard force		Standard travel	Displacement corrected	Standard force		Standard travel	Displacement corrected	Standard force		Standard travel	Displacement corrected	Standard force		Standard travel	Displacement corrected	Standard force		Standard travel	Displacement corrected	Standard force
mm	mm	N		mm	mm	N		mm	mm	N		mm	mm	N		mm	mm	N		mm	mm	N		mm	mm	N		mm	mm	N
0	-0.0076021	143.791		0	-0.00617242	145.613		0	-0.00684147	146.322		0	-0.00865786	140.622		0	-0.00833582	141.065		0	-0.00811268	141.807		0	-0.0103035	138.829		0	-0.00940326	141.264
3.58343e-06	-0.00759852	142.729		-3.72291e-06	-0.00617614	144.546		-1.12545e-05	-0.00685272	145.124		-5.37515e-06	-0.00866323	139.535		-9.97782e-07	-0.00833682	140.026		-1.71661e-07	-0.00811286	140.661		-4.43101e-06	-0.0103079	137.733		-2.17795e-06	-0.00940543	140.065
-2.60711e-06	-0.00760471	141.552		-6.72698e-06	-0.00617914	143.54		-1.82605e-05	-0.00685973	144.047		-2.59638e-06	-0.00866046	138.359		-6.17981e-06	-0.008342	138.898		8.88348e-06	-0.0081038	139.619		-4.79579e-06	-0.0103083	136.593		-1.45912e-05	-0.00941785	139.007
-3.48687e-06	-0.00760559	140.43		-4.2057e-06	-0.00617662	142.412		-2.34747e-05	-0.00686494	143.039		-8.07881e-06	-0.00866594	137.275		-2.12431e-06	-0.00833795	137.862		-6.78062e-06	-0.00811947	138.505		-7.71403e-06	-0.0103112	135.573		-2.41721e-05	-0.00942743	137.882
-2.08139e-06	-0.00760418	139.388		-6.93083e-06	-0.00617935	141.366		-2.92897e-05	-0.00687076	141.891		-9.9349e-06	-0.00866779	136.272		-9.03368e-06	-0.00834486	136.729		-2.16722e-06	-0.00811485	137.492		-8.12173e-06	-0.0103116	134.48		-2.78842e-05	-0.00943114	136.735
-4.30226e-06	-0.0076064	138.237		-8.01444e-06	-0.00618043	140.23		-3.01909e-05	-0.00687166	140.836		-8.75473e-06	-0.00866661	135.211		-5.97596e-06	-0.0083418	135.69		-3.37958e-06	-0.00811606	136.446		0.000118854	-0.0101846	133.514		-3.22294e-05	-0.00943549	135.707
4.67777e-06	-0.00759742	137.171		0.00181362	-0.00435879	141.355		-3.19397e-05	-0.00687341	139.655		0.00121681	-0.00744105	135.301		0.000239092	-0.00809673	134.788		0.00222643	-0.00588626	138.133		0.00194589	-0.00835758	135.091		-2.73478e-05	-0.0094306	134.644
0.0016895	-0.0059126	138.582		0.00249085	-0.00368157	142.385		-3.27981e-05	-0.00687427	138.561		0.00251889	-0.00613897	136.962		0.00169755	-0.00663827	136.041		0.00295906	-0.00515363	139.265		0.00345234	-0.00685113	137.307		0.0021946	-0.00720865	136.283
0.00248442	-0.00511768	139.71		0.00325632	-0.0029161	143.727		0.00220884	-0.00463263	140.077		0.00328263	-0.00537523	138.233		0.00312363	-0.0052122	138.123		0.00376834	-0.00434434	140.702		0.00434281	-0.00596066	138.853		0.00375742	-0.00564584	138.531
0.00335725	-0.00424485	141.176		0.00413023	-0.00204219	145.409		0.00293252	-0.00390894	141.257		0.0041597	-0.00449816	139.811		0.00396191	-0.00437391	139.603		0.00469344	-0.00341925	142.445		0.00533476	-0.00496871	140.684		0.00469543	-0.00470782	140.063
0.00429951	-0.00330259	143.004		0.00510147	-0.00107095	147.43		0.00375987	-0.0030816	142.752		0.00513639	-0.00352147	141.702		0.00491772	-0.0034181	141.399		0.00573035	-0.00238234	144.485		0.00643805	-0.00386542	142.803		0.00572864	-0.00367462	141.866
0.00531354	-0.00228856	145.2		0.00617242	0	149.781		0.00469359	-0.00214788	144.574		0.0062218	-0.00243606	143.908		0.005958	-0.00237782	143.509		0.00687763	-0.00123505	146.824		0.00763708	-0.0026664	145.195		0.00685819	-0.00254506	143.934
0.0064165	-0.0011856	147.767		0.00734416	0.00117174	152.467		0.00572447	-0.001117	146.726		0.00739248	-0.00126538	146.411		0.00709333	-0.0012425	145.914		0.00811268	0	149.444		0.00892679	-0.00137668	147.836		0.00808578	-0.00131748	146.259
0.0076021	0	150.694		0.0086281	0.00245568	155.469		0.00684147	0	149.201		0.00865786	0	149.19		0.00833582	0	148.601		0.00942981	0.00131712	152.317		0.0103035	0	150.701		0.00940326	0	148.815
0.00888821	0.00128611	153.965		0.0100118	0.00383943	158.752		0.00808166	0.00124019	151.975		0.0100233	0.00136547	152.223		0.00967872	0.0013429	151.552		0.0108436	0.00273096	155.419		0.0117888	0.00148536	153.766		0.0108283	0.00142505	151.567
0.0102606	0.0026585	157.529		0.0114893	0.00531693	162.276		0.00942155	0.00258008	155.017		0.0114918	0.0028339	155.479		0.0111145	0.00277865	154.745		0.0123604	0.00424768	158.716		0.01336	0.00305653	157.018		0.0123542	0.00295093	154.501
0.0117312	0.00412907	161.343		0.0130651	0.00689269	166.017		0.010859	0.00401749	158.306		0.0130455	0.00438766	158.932		0.0126403	0.00430449	158.15		0.0139763	0.0058636	162.186		0.0150213	0.0047178	160.442		0.0139843	0.00458107	157.589
0.0133122	0.00571014	165.392		0.0147415	0.00856907	169.958		0.012382	0.00554049	161.813		0.0146881	0.00603021	162.561		0.0142726	0.0059368	161.752		0.0156903	0.00757764	165.84		0.0167757	0.0064722	164.039		0.0157169	0.00631363	160.836
0.0149903	0.00738817	169.661		0.0164989	0.0103265	174.101		0.0139958	0.00715431	165.528		0.0164436	0.00778577	166.368		0.0160135	0.00767766	165.553		0.0174797	0.009367	169.662		0.0186468	0.00834332	167.81		0.0175386	0.00813533	164.227
0.0167851	0.009183	174.16		0.0183574	0.012185	178.443		0.0157048	0.00886335	169.446		0.0183121	0.00965424	170.357		0.0178749	0.0095391	169.548		0.0193954	0.0112827	173.673		0.0206285	0.010325	171.744		0.0194809	0.0100776	167.762
0.0186857	0.0110836	178.885		0.0203114	0.014139	183.005		0.0175085	0.010667	173.562		0.0202636	0.0116057	174.53		0.0198201	0.0114843	173.726		0.0214062	0.0132935	177.895		0.0227519	0.0124484	175.835		0.0214984	0.0120952	171.447
0.0206799	0.0130778	183.837		0.0223691	0.0161967	187.795		0.019425	0.0125836	177.872		0.0223206	0.0136628	178.883		0.0218593	0.0135235	178.084		0.0235311	0.0154185	182.312		0.0249777	0.0146742	180.074		0.023621	0.0142178	175.285
0.0227802	0.0151781	188.996		0.0245053	0.0183329	192.812		0.0214279	0.0145864	182.377		0.0244826	0.0158247	183.44		0.0240151	0.0156793	182.64		0.0257694	0.0176567	186.935		0.0273009	0.0169974	184.473		0.025824	0.0164207	179.276
0.0249904	0.0173883	194.358		0.0267456	0.0205732	198.044		0.0235303	0.0166889	187.083		0.0267586	0.0181008	188.213		0.0262482	0.0179124	187.407		0.0281278	0.0200151	191.775		0.0296911	0.0193876	189.036		0.0281312	0.018728	183.418
0.0273104	0.0197083	199.927		0.0291167	0.0229443	203.509		0.025743	0.0189015	191.993		0.029108	0.0204502	193.205		0.0285758	0.0202399	192.378		0.030572	0.0224593	196.813		0.0321589	0.0218554	193.757		0.0305525	0.0211492	187.699
0.0297036	0.0221015	205.714		0.0315835	0.0254111	209.205		0.028078	0.0212365	197.1		0.0315539	0.022896	198.431		0.0309885	0.0226526	197.55		0.033106	0.0249933	202.057		0.0346961	0.0243926	198.642		0.0330777	0.0236744	192.122
0.0321547	0.0245526	211.731		0.0341614	0.027989	215.133		0.0305213	0.0236798	202.4		0.0341022	0.0254443	203.881		0.0335261	0.0251902	202.912		0.0357033	0.0275906	207.521		0.0373282	0.0270248	203.677		0.0357123	0.026309	196.71
0.0346903	0.0270882	217.999		0.0368037	0.0306313	221.296		0.0330545	0.026213	207.901		0.0367597	0.0281019	209.548		0.036204	0.0278682	208.449		0.0384067	0.030294	213.169		0.0400858	0.0297823	208.851		0.038428	0.0290247	201.467
0.0373321	0.02973	224.524		0.0395382	0.0333658	227.696		0.0356698	0.0288283	213.604		0.0395291	0.0308712	215.403		0.0389905	0.0306547	214.167		0.0412014	0.0330887	219.015		0.0429585	0.0326551	214.172		0.0412264	0.0318232	206.419
0.0400909	0.0324888	231.279		0.0423722	0.0361998	234.326		0.0383604	0.031519	219.528		0.0424382	0.0337804	221.447		0.0418588	0.033523	220.076		0.0441123	0.0359996	225.056		0.0459494	0.035646	219.663		0.044123	0.0347197	211.579
0.042966	0.0353639	238.26		0.045305	0.0391326	241.157		0.0411892	0.0343477	225.668		0.0454559	0.036798	227.679		0.0447867	0.0364508	226.183		0.0471422	0.0390295	231.269		0.0490237	0.0387203	225.339		0.0471561	0.0377529	216.925
0.0459798	0.0383777	245.465		0.0483551	0.0421827	248.184		0.0441051	0.0372637	232.025		0.0485274	0.0398695	234.12		0.0477919	0.0394561	232.507		0.0502709	0.0421582	237.676		0.0521758	0.0418723	231.211		0.0503067	0.0409035	222.472
0.0490645	0.0414624	252.926		0.051529	0.0453566	255.424		0.047125	0.0402835	238.591		0.0516674	0.0430095	240.755		0.0509065	0.0425707	239.042		0.0534948	0.0453821	244.302		0.0554224	0.0451189	237.263		0.0536047	0.0442015	228.24
0.0522107	0.0446086	260.653		0.0548164	0.048644	262.896		0.0502799	0.0434385	245.359		0.0548788	0.0462209	247.574		0.0541353	0.0457995	245.774		0.0568186	0.048706	251.121		0.0587829	0.0484794	243.497		0.0569732	0.04757	234.242
0.055442	0.0478399	268.6		0.05816	0.0519876	270.617		0.0535312	0.0466897	252.34		0.0581966	0.0495387	254.571		0.0575023	0.0491665	252.721		0.0602424	0.0521298	258.139		0.0622563	0.0519528	249.929		0.0603601	0.0509569	240.493
0.0587909	0.0511888	276.769		0.0615956	0.0554231	278.581		0.0568619	0.0500204	259.556		0.0616539	0.0529961	261.746		0.0609678	0.052632	259.889		0.0638005	0.0556878	265.354		0.0658586	0.0555551	256.566		0.0638222	0.054419	246.984
0.0622853	0.0546832	285.155		0.0651465	0.0589741	286.763		0.0602632	0.0534217	267.014		0.0652287	0.0565709	269.122		0.0645057	0.0561698	267.284		0.0675033	0.0593906	272.759		0.069537	0.0592335	263.443		0.067407	0.0580037	253.693
0.0659209	0.0583188	293.776		0.0688361	0.0626637	295.16		0.063747	0.0569056	274.704		0.0688625	0.0602047	276.725		0.06815	0.0598142	274.916		0.0712647	0.063152	280.384		0.0733034	0.0629999	270.569		0.0711298	0.0617265	260.617
0.0695745	0.0619724	302.651		0.0726553	0.0664829	303.789		0.0673438	0.0605024	282.643		0.0725656	0.0639078	284.549		0.0719038	0.063568	282.769		0.0750639	0.0669512	288.236		0.0771821	0.0668786	277.96		0.0749473	0.065544	267.772
0.0733072	0.0657051	311.783		0.076551	0.0703786	312.668		0.071085	0.0642435	290.844		0.0763789	0.067721	292.606		0.0757847	0.0674488	290.848		0.0789442	0.0708315	296.293		0.0811911	0.0708876	285.612		0.0788227	0.0694195	275.167
0.0771711	0.069569	321.149		0.0804866	0.0743142	321.817		0.0749084	0.0680669	299.31		0.080348	0.0716902	300.929		0.0797907	0.0714548	299.171		0.0829344	0.0748217	304.571		0.0853362	0.0750327	293.529		0.0827733	0.0733701	282.813
0.0811935	0.0735914	330.753		0.0844834	0.0783109	331.246		0.0787897	0.0719482	308.007		0.0844159	0.0757581	309.53		0.0838318	0.0754959	307.746		0.0870677	0.078955	313.095		0.0895716	0.0792682	301.715		0.0868294	0.0774262	290.695
0.0853535	0.0777514	340.613		0.0886195	0.0824471	340.969		0.0827778	0.0759364	316.92		0.0885322	0.0798744	318.425		0.0879105	0.0795747	316.559		0.091299	0.0831863	321.863		0.0938681	0.0835647	310.19		0.0910388	0.0816355	298.819
0.0895873	0.0819852	350.731		0.0928967	0.0867243	350.987		0.0869631	0.0801217	326.053		0.0927522	0.0840944	327.614		0.0920805	0.0837447	325.598		0.0955715	0.0874588	330.875		0.0982282	0.0879248	318.967		0.0953942	0.0859909	307.201
0.0938333	0.0862312	361.151		0.097257	0.0910846	361.241		0.0912834	0.0844419	335.426		0.097123	0.0884651	337.081		0.0963926	0.0880568	334.865		0.09993	0.0918173	340.135		0.102706	0.0924022	328.038		0.0998236	0.0904204	315.831
0.0981328	0.0905307	371.904		0.101688	0.0955153	371.708		0.0956129	0.0887715	345.041		0.101668	0.0930101	346.815		0.100814	0.0924784	344.35		0.10444	0.096327	349.665		0.107288	0.0969842	337.399		0.10434	0.0949365	324.707
0.102623	0.0950205	382.993		0.10627	0.100097	382.425		0.0999809	0.0931394	354.877		0.106306	0.0976485	356.79		0.105315	0.0969788	354.047		0.109067	0.100955	359.463		0.111953	0.10165	347.013		0.108996	0.0995929	333.858
0.10721	0.0996076	394.354		0.111022	0.104849	393.412		0.104439	0.097597	364.964		0.110991	0.102333	367.004		0.10988	0.101544	363.989		0.11376	0.105648	369.485		0.116734	0.106431	356.877		0.113781	0.104378	343.311
0.111848	0.104246	405.917		0.115818	0.109645	404.652		0.109042	0.102201	375.311		0.115722	0.107064	377.524		0.114608	0.106272	374.235		0.118537	0.110424	379.702		0.12167	0.111367	366.993		0.118616	0.109213	353.053
0.116645	0.109043	417.686		0.120643	0.11447	416.133		0.113745	0.106903	385.871		0.120573	0.111916	388.344		0.119454	0.111118	384.765		0.123494	0.115381	390.164		0.126686	0.116383	377.354		0.123494	0.114091	363.074
0.121632	0.11403	429.722		0.125557	0.119385	427.89		0.118489	0.111647	396.64		0.125521	0.116863	399.411		0.12435	0.116014	395.507		0.128572	0.12046	400.906		0.131731	0.121427	387.957		0.128471	0.119068	373.412
0.12669	0.119087	442.033		0.130603	0.12443	439.906		0.123356	0.116514	407.706		0.13054	0.121882	410.688		0.129362	0.121027	406.457		0.133669	0.125557	411.911		0.13684	0.126536	398.84		0.133603	0.124199	384.061
0.131732	0.124129	454.597		0.135724	0.129551	452.151		0.128405	0.121563	419.148		0.135748	0.12709	422.177		0.134594	0.126258	417.653		0.138767	0.130654	423.162		0.142077	0.131774	410.04		0.138858	0.129455	394.98
0.136821	0.129219	467.425		0.140894	0.134721	464.652		0.133525	0.126684	430.962		0.141131	0.132473	433.889		0.139941	0.131605	429.137		0.144016	0.135903	434.694		0.147397	0.137093	421.536		0.144207	0.134804	406.186
0.142046	0.134444	480.517		0.146231	0.140059	477.523		0.138686	0.131844	443.101		0.146517	0.137859	445.843		0.145254	0.136919	440.948		0.149435	0.141323	446.499		0.152764	0.142461	433.312		0.149714	0.140311	417.714
0.147375	0.139773	493.823		0.151694	0.145522	490.798		0.144012	0.137171	455.529		0.151919	0.143262	458.057		0.150636	0.1423	453.12		0.154984	0.146871	458.567		0.158271	0.147968	445.362		0.155287	0.145883	429.523
0.152773	0.145171	507.366		0.157187	0.151014	504.435		0.149532	0.14269	468.264		0.157445	0.148787	470.591		0.156183	0.147847	465.617		0.160674	0.152561	470.929		0.163945	0.153642	457.695		0.160813	0.15141	441.571
0.158336	0.150734	521.242		0.162826	0.156654	518.379		0.155138	0.148297	481.303		0.163081	0.154423	483.439		0.161834	0.153499	478.363		0.1665	0.158387	483.596		0.169751	0.159447	470.294		0.166455	0.157052	453.853
0.164037	0.156435	535.506		0.168697	0.162525	532.645		0.160767	0.153926	494.657		0.168761	0.160103	496.556		0.167628	0.159293	491.32		0.172323	0.16421	496.567		0.175655	0.165352	483.173		0.172287	0.162884	466.366
0.169767	0.162165	550.128		0.174662	0.16849	547.259		0.166465	0.159624	508.33		0.174532	0.165874	509.95		0.173632	0.165296	504.5		0.178192	0.17008	509.811		0.181687	0.171384	496.365		0.178153	0.16875	479.137
0.175629	0.168027	565.055		0.180632	0.174459	562.219		0.172252	0.165411	522.291		0.180485	0.171827	523.626		0.179675	0.171339	517.97		0.184254	0.176141	523.306		0.187802	0.177498	509.873		0.184068	0.174665	492.176
0.181702	0.1741	580.279		0.186681	0.180509	577.51		0.178167	0.171325	536.501		0.186579	0.177921	537.581		0.185668	0.177332	531.757		0.190369	0.182257	537.07		0.193971	0.183668	523.665		0.190136	0.180733	505.47
0.187875	0.180273	595.825		0.192806	0.186633	593.099		0.184298	0.177456	550.923		0.192743	0.184086	551.842		0.19173	0.183394	545.822		0.196519	0.188407	551.148		0.20028	0.189976	537.696		0.196324	0.186921	519.026
0.194093	0.186491	611.703		0.199061	0.192889	608.962		0.190493	0.183652	565.554		0.199039	0.190381	566.448		0.197903	0.189567	560.15		0.202831	0.194719	565.494		0.206727	0.196424	551.978		0.202653	0.193249	532.847
0.200377	0.192775	627.862		0.205551	0.199379	625.028		0.196676	0.189834	580.476		0.205441	0.196783	581.395		0.20411	0.195774	574.753		0.209267	0.201154	580.096		0.21331	0.203006	566.566		0.209177	0.199774	546.95
0.206717	0.199115	644.3		0.212083	0.205911	641.309		0.20294	0.196098	595.758		0.211851	0.203193	596.67		0.210536	0.2022	589.645		0.215795	0.207682	594.979		0.21999	0.209687	581.417		0.215759	0.206355	561.427
0.213219	0.205617	661.024		0.218602	0.21243	657.902		0.209323	0.202482	611.375		0.218402	0.209744	612.209		0.217063	0.208727	604.835		0.222547	0.214435	610.169		0.226686	0.216383	596.504		0.22235	0.212946	576.294
0.219935	0.212333	677.961		0.225201	0.219029	674.842		0.215725	0.208883	627.303		0.225128	0.21647	628.045		0.223587	0.215251	620.336		0.22931	0.221197	625.731		0.233404	0.2231	611.886		0.229065	0.219662	591.455
0.226633	0.219031	695.139		0.231873	0.2257	692.105		0.222263	0.215422	643.499		0.231969	0.223311	644.21		0.23035	0.222014	636.157		0.236034	0.227921	641.626		0.240293	0.22999	627.597		0.235893	0.226489	606.905
0.233325	0.225723	712.618		0.238614	0.232442	709.666		0.22904	0.222199	659.953		0.238901	0.230243	660.645		0.237266	0.22893	652.332		0.242891	0.234779	657.784		0.247227	0.236923	643.684		0.242938	0.233535	622.64
0.240178	0.232576	730.442		0.24556	0.239387	727.45		0.235881	0.22904	676.747		0.245811	0.237153	677.359		0.244235	0.235899	668.849		0.249857	0.241744	674.231		0.254169	0.243866	660.13		0.250156	0.240753	638.683
0.247087	0.239485	748.634		0.252647	0.246474	745.498		0.242828	0.235986	693.919		0.252763	0.244106	694.383		0.251255	0.242919	685.644		0.257104	0.248991	690.947		0.261237	0.250933	676.904		0.257261	0.247858	655.057
0.254077	0.246475	767.129		0.259815	0.253643	763.932		0.249879	0.243037	711.441		0.2599	0.251243	711.747		0.258385	0.25005	702.75		0.264419	0.256306	707.926		0.268442	0.258139	694.08		0.264363	0.25496	671.771
0.26122	0.253617	785.877		0.267134	0.260962	782.735		0.256945	0.250104	729.315		0.267094	0.258436	729.444		0.26573	0.257394	720.18		0.271601	0.263488	725.183		0.275876	0.265572	711.734		0.27157	0.262167	688.855
0.268492	0.26089	804.982		0.274472	0.2683	801.903		0.264152	0.257311	747.497		0.274364	0.265706	747.407		0.27318	0.264844	737.885		0.27891	0.270797	742.77		0.283439	0.273135	729.871		0.278933	0.26953	706.343
0.275929	0.268327	824.477		0.281882	0.275709	821.395		0.271557	0.264716	766.002		0.281741	0.273083	765.642		0.280617	0.272281	755.867		0.286341	0.278228	760.753		0.290944	0.280641	748.449		0.286474	0.277071	724.172
0.283465	0.275863	844.347		0.289505	0.283332	841.165		0.279071	0.272229	784.79		0.289286	0.280628	784.274		0.288143	0.279808	774.162		0.29397	0.285857	779.095		0.298544	0.288241	767.467		0.29398	0.284576	742.332
0.290993	0.283391	864.572		0.297287	0.291114	861.131		0.286613	0.279771	803.834		0.297096	0.288438	803.351		0.295756	0.28742	792.795		0.30171	0.293597	797.691		0.306364	0.29606	786.917		0.301634	0.292231	760.912
0.298645	0.291043	885.132		0.305135	0.298963	881.215		0.294149	0.287308	823.154		0.304879	0.296222	822.781		0.303414	0.295078	811.718		0.309467	0.301355	816.559		0.314488	0.304185	806.759		0.309492	0.300088	779.941
0.306502	0.2989	905.978		0.312919	0.306747	901.391		0.301847	0.295006	842.861		0.312673	0.304015	842.51		0.311201	0.302865	830.925		0.317477	0.309364	835.804		0.322596	0.312293	826.915		0.317476	0.308072	799.358
0.314513	0.30691	927.063		0.320773	0.314601	921.797		0.309606	0.302764	862.95		0.32065	0.311992	862.541		0.319124	0.310788	850.471		0.325654	0.317542	855.407		0.330611	0.320307	847.432		0.3255	0.316097	819.109
0.322519	0.314917	948.033		0.32867	0.322497	942.589		0.317401	0.31056	883.301		0.328925	0.320268	882.902		0.327181	0.318845	870.414		0.333851	0.325738	875.331		0.338702	0.328399	868.455		0.333663	0.32426	839.191
0.3305	0.322898	967.656		0.336506	0.330333	963.758		0.325326	0.318485	903.947		0.337307	0.328649	903.552		0.335242	0.326906	890.752		0.342052	0.33394	895.545		0.346884	0.33658	889.957		0.342016	0.332612	859.663
0.338602	0.331	985.155		0.344418	0.338246	985.324		0.333404	0.326562	925.008		0.345521	0.336863	924.46		0.343346	0.33501	911.48		0.350411	0.342298	916.091		0.355221	0.344917	911.804		0.350387	0.340984	880.506
0.346771	0.339169	1000.34		0.352472	0.346299	1007.33		0.341785	0.334943	946.533		0.353713	0.345056	945.788		0.35166	0.343324	932.597		0.358856	0.350744	937.022		0.363595	0.353291	933.924		0.358805	0.349402	901.641
0.354426	0.346824	1013.18		0.360946	0.354774	1029.8		0.350158	0.343316	968.346		0.362017	0.353359	967.589		0.360194	0.351859	953.991		0.367299	0.359186	958.264		0.372162	0.361858	956.474		0.367251	0.357848	923.05
0.35883	0.351228	1023.6		0.369803	0.363631	1052.6		0.358524	0.351682	990.433		0.37056	0.361903	989.719		0.368857	0.360521	975.65		0.375773	0.36766	979.801		0.380911	0.370608	979.471		0.375753	0.36635	944.717
0.360409	0.352807	1031.58		0.378728	0.372555	1075.73		0.367068	0.360227	1012.85		0.3791	0.370443	1012.05		0.377503	0.369167	997.631		0.384297	0.376185	1001.66		0.389725	0.379422	1002.86		0.384433	0.375029	966.688
0.361261	0.353659	1037.09		0.387717	0.381544	1099.33		0.375947	0.369106	1035.64		0.387818	0.37916	1034.69		0.38629	0.377955	1020.05		0.393014	0.384901	1023.89		0.398544	0.388241	1026.61		0.393288	0.383885	989.002
0.361953	0.354351	1040.13		0.396899	0.390727	1123.4		0.384815	0.377974	1058.71		0.396759	0.388101	1057.76		0.395118	0.386782	1042.84		0.401968	0.393855	1046.55		0.407596	0.397292	1050.83		0.402215	0.392812	1011.74
0.362844	0.355242	1036.69		0.406004	0.399832	1147.86		0.393508	0.386667	1082.08		0.405813	0.397155	1081.26		0.404002	0.395667	1065.96		0.411116	0.403004	1069.65		0.416784	0.406481	1075.56		0.411119	0.401715	1034.91
0.362939	0.355337	1034.12		0.414974	0.408801	1172.61		0.402239	0.395398	1105.91		0.414862	0.406204	1105.14		0.413014	0.404678	1089.47		0.420294	0.412181	1093.19		0.425954	0.415651	1100.63		0.420107	0.410704	1058.52
0.362999	0.355397	1031.56		0.423998	0.417825	1197.66		0.411201	0.40436	1130.16		0.424085	0.415427	1129.43		0.422293	0.413957	1113.38		0.42947	0.421357	1117.16		0.435126	0.424822	1125.94		0.429368	0.419964	1082.42
0.363037	0.355435	1028.99		0.433213	0.427041	1222.88		0.42025	0.413408	1154.67		0.433458	0.4248	1154.18		0.431599	0.423264	1137.56		0.438906	0.430793	1141.47		0.444423	0.434119	1151.52		0.438818	0.429414	1106.55
0.363053	0.355451	1026.45		0.442458	0.436285	1248.17		0.429359	0.422518	1179.4		0.442838	0.43418	1179.26		0.44081	0.432475	1161.99		0.448562	0.44045	1166.01		0.453984	0.443681	1177.48		0.448282	0.438879	1131.01
0.363058	0.355456	1023.96		0.451891	0.445718	1273.6		0.438719	0.431878	1204.49		0.452212	0.443554	1204.55		0.450194	0.441859	1186.83		0.458143	0.450031	1190.84		0.463696	0.453392	1203.77		0.457881	0.448478	1155.89
0.363058	0.355456	1021.54		0.461599	0.455427	1299.28		0.44825	0.441408	1230		0.461659	0.453001	1230.11		0.459918	0.451582	1212.11		0.467723	0.459611	1216.04		0.473395	0.463092	1230.38		0.467471	0.458068	1181.16
0.363058	0.355456	1019.19		0.471343	0.46517	1325.16		0.457797	0.450956	1255.87		0.471321	0.462663	1256.06		0.469523	0.461188	1237.78		0.477361	0.469249	1241.57		0.483044	0.47274	1257.38		0.477063	0.467659	1206.75
0.363058	0.355456	1016.92		0.481037	0.474864	1351.18		0.467465	0.460624	1282.04		0.48111	0.472453	1282.36		0.479057	0.470722	1263.83		0.486955	0.478843	1267.45		0.492891	0.482588	1284.68		0.486875	0.477471	1232.67
0.36305	0.355448	1014.72		0.491003	0.484831	1377.41		0.477296	0.470455	1308.46		0.490876	0.482218	1308.98		0.488771	0.480435	1290.25		0.496702	0.488589	1293.75		0.50294	0.492637	1312.1		0.496991	0.487587	1258.74
0.363045	0.355443	1012.58		0.501088	0.494915	1403.84		0.487156	0.480315	1334.95		0.500602	0.491944	1335.98		0.498742	0.490406	1316.93		0.506727	0.498614	1320.38		0.512892	0.502589	1339.62		0.506969	0.497566	1284.85
0.363043	0.355441	1010.51		0.511001	0.504829	1430.03		0.496989	0.490147	1361.26		0.510568	0.50191	1363.2		0.508694	0.500358	1343.74		0.516731	0.508618	1347.24		0.522823	0.51252	1367.35		0.516817	0.507413	1310.99
0.363038	0.355436	1008.5		0.52076	0.514588	1454.37		0.506804	0.499963	1387.47		0.520685	0.512027	1390.51		0.51875	0.510414	1370.63		0.526604	0.518491	1374.29		0.532788	0.522484	1395.3		0.526884	0.517481	1337.37
0.363027	0.355425	1006.55		0.530667	0.524494	1475.8		0.516661	0.509819	1413.83		0.530722	0.522064	1417.89		0.528914	0.520579	1397.71		0.536678	0.528566	1401.59		0.542663	0.532359	1423.45		0.537001	0.527597	1363.97
				0.540745	0.534572	1494.2		0.526439	0.519597	1440.46		0.540793	0.532135	1445.45		0.538973	0.530637	1424.93		0.546965	0.538852	1429.16		0.552539	0.542236	1451.81		0.546818	0.537415	1390.72
				0.550337	0.544164	1509.51		0.536017	0.529175	1467.31		0.550847	0.542189	1473.16		0.548982	0.540646	1452.26		0.557011	0.548899	1457.01		0.562656	0.552353	1480.28		0.556576	0.547172	1417.57
				0.556438	0.550265	1521.72		0.545533	0.538691	1494.33		0.560764	0.552106	1500.99		0.558962	0.550626	1479.72		0.566886	0.558774	1485.13		0.572771	0.562468	1508.72		0.566551	0.557148	1444.47
				0.558679	0.552507	1530.89		0.555454	0.548613	1521.36		0.5707	0.562042	1528.99		0.568861	0.560525	1507.28		0.576773	0.568661	1513.52		0.582669	0.572366	1537.11		0.576572	0.567169	1471.36
				0.559738	0.553565	1537.05		0.565834	0.558993	1548.28		0.580874	0.572216	1557.05		0.578653	0.570317	1534.8		0.586666	0.578553	1542.05		0.592713	0.582409	1565.54		0.586612	0.577208	1498.21
				0.560594	0.554421	1540.08		0.576201	0.569359	1575.19		0.590888	0.58223	1585.02		0.588434	0.580098	1562.29		0.596584	0.588471	1570.62		0.602927	0.592624	1594.1		0.596777	0.587374	1525.06
				0.561578	0.555405	1537.14		0.586492	0.579651	1602.27		0.600719	0.592061	1612.86		0.598436	0.5901	1589.93		0.606658	0.598545	1599.25		0.612837	0.602533	1622.82		0.606877	0.597473	1552
				0.561789	0.555616	1533.03		0.596636	0.589795	1629.55		0.610774	0.602116	1640.77		0.608572	0.600236	1617.71		0.616721	0.608608	1628.02		0.622659	0.612355	1651.64		0.616867	0.607463	1579
				0.561922	0.555749	1528.83		0.606592	0.59975	1657		0.620956	0.612299	1668.81		0.618646	0.610311	1645.61		0.626665	0.618552	1656.98		0.632642	0.622338	1680.53		0.626898	0.617495	1606.06
				0.562002	0.55583	1524.72		0.616582	0.60974	1684.47		0.630833	0.622175	1696.98		0.628635	0.620299	1673.61		0.636728	0.628615	1686.21		0.642625	0.632322	1709.45		0.636873	0.627469	1633.22
				0.562056	0.555883	1520.67		0.626791	0.61995	1711.67		0.640635	0.631978	1725.18		0.638789	0.630453	1701.62		0.646806	0.638693	1715.68		0.652589	0.642286	1738.34		0.646705	0.637302	1660.35
				0.562081	0.555909	1516.69		0.636799	0.629957	1738.46		0.650603	0.641945	1753.3		0.649022	0.640686	1729.58		0.656785	0.648672	1745.19		0.662716	0.652413	1767.23		0.656474	0.64707	1687.42
				0.5621	0.555927	1512.84		0.646662	0.63982	1764.92		0.660614	0.651956	1781.16		0.65903	0.650695	1757.53		0.666677	0.658564	1774.58		0.672831	0.662528	1796.23		0.666392	0.656989	1714.59
				0.562103	0.55593	1509.1		0.656792	0.649951	1791.26		0.670645	0.661987	1808.64		0.669015	0.660679	1785.51		0.676686	0.668574	1804.02		0.682811	0.672508	1825.32		0.676493	0.66709	1741.94
				0.56211	0.555937	1505.5		0.666942	0.660101	1817.3		0.680784	0.672127	1835.84		0.678877	0.670541	1813.53		0.686832	0.678719	1833.57		0.692883	0.682579	1854.52		0.686615	0.677211	1769.35
				0.562101	0.555929	1502.02		0.676747	0.669905	1843.21		0.690812	0.682154	1862.98		0.688665	0.680329	1841.64		0.696882	0.688769	1863.16		0.702941	0.692638	1883.82		0.696619	0.687216	1796.89
				0.562099	0.555927	1498.67		0.686529	0.679688	1869		0.700572	0.691915	1890.24		0.698582	0.690246	1869.87		0.706768	0.698655	1892.89		0.712867	0.702563	1913.08		0.706709	0.697306	1824.47
				0.562095	0.555922	1495.43		0.696543	0.689702	1894.67		0.710267	0.701609	1917.65		0.708668	0.700332	1898.12		0.716744	0.708631	1922.74		0.722688	0.712385	1942.22		0.71693	0.707527	1852.02
				0.562091	0.555919	1492.29		0.706565	0.699723	1920.08		0.719924	0.711266	1945.12		0.718635	0.7103	1926.35		0.726876	0.718764	1952.54		0.732638	0.722334	1971.39		0.726991	0.717587	1879.54
				0.562084	0.555911	1489.25		0.716604	0.709762	1944.12		0.72968	0.721022	1972.46		0.728582	0.720246	1954.56		0.73687	0.728757	1982.2		0.74273	0.732426	2000.69		0.736992	0.727588	1907.08
				0.562081	0.555908	1486.29		0.726764	0.719922	1965.31		0.739641	0.730983	1999.6		0.738801	0.730465	1982.84		0.746826	0.738713	2011.9		0.752804	0.7425	2030.06		0.746901	0.737498	1934.59
				0.562076	0.555904	1483.42		0.736905	0.730064	1983.23		0.749883	0.741225	2026.78		0.748997	0.740661	2011.23		0.756875	0.748763	2041.69		0.762746	0.752442	2059.55		0.756679	0.747276	1962.17
								0.746887	0.740046	1997.98		0.760233	0.751575	2054.19		0.758955	0.750619	2039.81		0.766783	0.75867	2071.58		0.772709	0.762406	2089.09		0.766513	0.75711	1989.9
								0.754835	0.747994	2009.54		0.770497	0.761839	2081.76		0.768852	0.760516	2068.56		0.776621	0.768508	2101.59		0.782836	0.772533	2118.61		0.776609	0.767206	2017.66
								0.758325	0.751484	2018.16		0.780531	0.771873	2109.41		0.778758	0.770422	2097.43		0.786667	0.778555	2131.73		0.792905	0.782601	2148.09		0.786626	0.777222	2045.33
								0.759508	0.752666	2023.62		0.7906	0.781942	2136.89		0.788572	0.780236	2126.32		0.796796	0.788683	2161.85		0.802854	0.792551	2177.63		0.796519	0.787116	2072.93
								0.76037	0.753529	2025.85		0.800884	0.792226	2163.96		0.79858	0.790245	2155.24		0.806686	0.798574	2191.81		0.81278	0.802476	2207.22		0.806678	0.797275	2100.59
								0.7615	0.754658	2021.11		0.811044	0.802386	2190.64		0.808727	0.800391	2184.26		0.816643	0.808531	2221.75		0.822617	0.812314	2236.93		0.816979	0.807576	2128.35
								0.761739	0.754898	2015.3		0.821032	0.812374	2217.04		0.818707	0.810372	2213.42		0.8269	0.818787	2251.82		0.832491	0.822187	2266.83		0.826946	0.817542	2156.18
								0.761886	0.755044	2009.2		0.830924	0.822266	2243.18		0.828645	0.820309	2242.78		0.836902	0.82879	2282.05		0.842564	0.832261	2296.85		0.836774	0.82737	2184.11
								0.761982	0.755141	2003.35		0.84071	0.832052	2269.21		0.838745	0.830409	2272.46		0.846681	0.838568	2312.38		0.85265	0.842347	2326.8		0.846707	0.837304	2212.1
								0.762038	0.755197	1997.69		0.850571	0.841914	2295.13		0.848809	0.840473	2302.35		0.85659	0.848478	2342.79		0.862618	0.852314	2356.65		0.856608	0.847204	2240.06
								0.762068	0.755227	1992.18		0.860644	0.851986	2320.84		0.858734	0.850398	2332.15		0.86664	0.858527	2373.27		0.872719	0.862415	2386.53		0.866554	0.857151	2267.89
								0.762083	0.755242	1986.87		0.870638	0.86198	2346.27		0.868638	0.860302	2361.86		0.876601	0.868488	2403.73		0.883046	0.872742	2416.49		0.876652	0.867249	2295.63
												0.880573	0.871915	2371.3		0.878723	0.870387	2391.65		0.886674	0.878561	2434.13		0.893057	0.882754	2446.57		0.886688	0.877284	2323.4
												0.89073	0.882072	2395.97		0.888871	0.880535	2421.54		0.896814	0.888702	2464.6		0.902887	0.892584	2476.79		0.896633	0.88723	2351.23
												0.900981	0.892323	2420.51		0.898847	0.890511	2451.47		0.906829	0.898717	2495.15		0.912767	0.902464	2507.13		0.906733	0.89733	2379.22
												0.910949	0.902292	2444.97		0.908748	0.900412	2481.51		0.916879	0.908767	2525.79		0.922678	0.912375	2537.5		0.916815	0.907412	2407.35
												0.920848	0.91219	2469.38		0.918802	0.910466	2511.55		0.926939	0.918827	2556.5		0.932564	0.922261	2567.77		0.92675	0.917347	2435.41
												0.930807	0.922149	2493.72		0.928882	0.920546	2541.38		0.936901	0.928788	2587.22		0.942654	0.93235	2597.96		0.936618	0.927214	2463.29
												0.940621	0.931963	2517.86		0.938841	0.930505	2570.88		0.946741	0.938628	2617.77		0.952774	0.94247	2628.19		0.94665	0.937247	2491.2
												0.950525	0.941868	2541.81		0.94886	0.940524	2600.13		0.956636	0.948523	2648.29		0.962775	0.952471	2658.54		0.956801	0.947397	2519.17
												0.960678	0.95202	2565.64		0.958831	0.950495	2629.15		0.966699	0.958587	2678.87		0.97286	0.962557	2689.05		0.966849	0.957445	2547.15
												0.970728	0.96207	2589.39		0.96866	0.960324	2658.01		0.976809	0.968696	2709.51		0.982926	0.972622	2719.75		0.976733	0.967329	2575.26
												0.980637	0.97198	2613.29		0.9784	0.970064	2686.85		0.986769	0.978656	2740.22		0.992877	0.982574	2750.43		0.986713	0.97731	2603.49
												0.990727	0.982069	2637.57		0.988318	0.979983	2715.76		0.996705	0.988592	2770.96		1.00277	0.992462	2780.93		0.996817	0.987414	2631.65
												1.00083	0.992168	2662.06		0.99808	0.989744	2744.63		1.0068	0.998691	2801.65		1.01273	1.00242	2811.38		1.00681	0.997411	2659.63
												1.01073	1.00208	2686.45		1.0077	0.999365	2773.34		1.01691	1.0088	2832.28		1.02279	1.01248	2841.95		1.0168	1.0074	2687.65
												1.0206	1.01194	2710.63		1.01767	1.00934	2802.09		1.02689	1.01878	2862.93		1.03277	1.02247	2872.65		1.02686	1.01745	2715.79
												1.03067	1.02201	2734.85		1.02797	1.01964	2831		1.03683	1.02872	2893.6		1.04262	1.03232	2903.55		1.03672	1.02732	2744.06
												1.04087	1.03222	2759.16		1.03821	1.02987	2860.11		1.04665	1.03854	2924.38		1.05254	1.04224	2934.61		1.0465	1.03709	2772.46
												1.05092	1.04226	2783.48		1.04825	1.03991	2889.4		1.05651	1.0484	2955.34		1.06262	1.05232	2965.69		1.05661	1.04721	2800.94
												1.06078	1.05213	2807.93		1.05836	1.05002	2918.91		1.06653	1.05842	2986.43		1.0727	1.06239	2996.75		1.06677	1.05736	2829.3
												1.07079	1.06213	2832.5		1.06847	1.06014	2948.51		1.07665	1.06854	3017.47		1.08274	1.07244	3027.88		1.07667	1.06727	2857.48
												1.08089	1.07223	2857.01		1.07854	1.0702	2977.97		1.08663	1.07852	3048.39		1.09284	1.08253	3059.12		1.0867	1.0773	2885.6
												1.09084	1.08218	2881.36		1.08868	1.08035	3007.18		1.0967	1.08858	3079.32		1.10275	1.09245	3090.53		1.09694	1.08753	2913.85
												1.10078	1.09212	2905.72		1.0988	1.09047	3036.16		1.10698	1.09887	3110.35		1.11264	1.10234	3122.16		1.10687	1.09746	2942.27
												1.11084	1.10219	2929.92		1.10884	1.10051	3065		1.11705	1.10894	3141.46		1.12276	1.11245	3153.94		1.11664	1.10723	2970.72
												1.12075	1.11209	2952.26		1.1189	1.11056	3093.68		1.12692	1.11881	3172.7		1.13287	1.12256	3185.63		1.12653	1.11713	2999.17
												1.13056	1.12191	2971.37		1.1289	1.12056	3122.18		1.13677	1.12866	3204.07		1.14275	1.13245	3217.17		1.13653	1.12713	3027.57
												1.14065	1.132	2987.06		1.13884	1.13051	3150.45		1.14672	1.1386	3235.45		1.15272	1.14242	3248.73		1.14654	1.13714	3055.87
												1.15041	1.14175	2999.46		1.14871	1.14037	3178.46		1.1566	1.14849	3266.72		1.16297	1.15267	3280.45		1.15666	1.14726	3084.1
												1.15655	1.14789	3008.46		1.15864	1.15031	3206.3		1.16662	1.15851	3297.88		1.17292	1.16262	3312.31		1.1668	1.15739	3112.39
												1.15877	1.15011	3014.14		1.16869	1.16036	3234.05		1.17676	1.16865	3329.06		1.18268	1.17238	3344.29		1.17682	1.16741	3140.73
												1.15979	1.15113	3016.64		1.17876	1.17043	3261.72		1.18677	1.17866	3360.28		1.19258	1.18228	3376.41		1.18688	1.17748	3169.14
												1.16127	1.15262	3011.94		1.18872	1.18038	3289.3		1.19682	1.18871	3391.58		1.20263	1.19233	3408.58		1.19692	1.18751	3197.57
												1.16164	1.15298	3004.98		1.19871	1.19037	3316.68		1.20692	1.19881	3422.93		1.21262	1.20232	3440.62		1.20685	1.19745	3225.92
												1.16185	1.1532	2996.8		1.20884	1.20051	3343.88		1.21693	1.20882	3454.1		1.22271	1.2124	3472.54		1.21668	1.20728	3254.11
												1.16197	1.15331	2988.71		1.21892	1.21059	3370.88		1.22678	1.21867	3484.82		1.23288	1.22257	3504.53		1.22661	1.2172	3282.24
												1.16205	1.15339	2980.91		1.22888	1.22054	3397.51		1.23669	1.22858	3515.18		1.24292	1.23261	3536.57		1.23667	1.22727	3310.4
												1.16209	1.15343	2973.33		1.23871	1.23038	3424		1.2467	1.23859	3545.35		1.25292	1.24261	3568.65		1.24676	1.23735	3338.56
												1.16211	1.15346	2965.97		1.24857	1.24023	3450.49		1.25656	1.24845	3575.38		1.26286	1.25256	3600.79		1.25674	1.24734	3366.75
												1.16212	1.15346	2958.89		1.25854	1.2502	3477.02		1.26623	1.25811	3605.43		1.27276	1.26246	3632.95		1.26672	1.25732	3394.89
												1.16213	1.15347	2952.08		1.26862	1.26029	3503.44		1.27593	1.26782	3635.74		1.28259	1.27228	3664.98		1.27682	1.26742	3422.92
												1.16212	1.15346	2945.54		1.27865	1.27031	3529.6		1.28577	1.27766	3666.22		1.29243	1.28213	3696.95		1.28691	1.2775	3450.85
												1.16212	1.15346	2939.25		1.28864	1.28031	3555.54		1.29573	1.28762	3696.66		1.30245	1.29215	3729.05		1.29685	1.28744	3478.74
												1.16211	1.15346	2933.2		1.29881	1.29047	3581.42		1.30565	1.29754	3727.09		1.3126	1.3023	3761.29		1.30676	1.29736	3506.55
												1.16211	1.15345	2927.36		1.309	1.30067	3607.17		1.31597	1.30786	3757.69		1.32265	1.31234	3793.66		1.31659	1.30718	3534.35
												1.1621	1.15344	2921.73		1.31898	1.31064	3632.91		1.32634	1.31823	3788.5		1.33263	1.32233	3826.05		1.32645	1.31705	3562.25
												1.16209	1.15344	2916.29		1.32884	1.3205	3658.92		1.33644	1.32833	3819.55		1.34281	1.33251	3858.39		1.33652	1.32711	3590.19
												1.16208	1.15343	2911.03		1.33877	1.33043	3684.9		1.34655	1.33844	3850.84		1.353	1.3427	3890.67		1.3466	1.33719	3617.96
												1.16208	1.15342	2905.92		1.34863	1.3403	3710.64		1.35676	1.34865	3882.11		1.363	1.3527	3922.92		1.35654	1.34713	3645.53
												1.16208	1.15342	2900.97		1.35858	1.35024	3736.18		1.36674	1.35863	3913.08		1.37295	1.36264	3955.1		1.36667	1.35727	3673.05
																1.36871	1.36037	3761.6		1.37665	1.36854	3943.63		1.38275	1.37245	3987.27		1.37701	1.3676	3700.56
																1.3788	1.37046	3786.9		1.38689	1.37878	3973.97		1.39258	1.38227	4019.41		1.38702	1.37762	3727.98
																1.38875	1.38042	3812.15		1.39696	1.38885	4004.23		1.40256	1.39225	4051.31		1.39687	1.38746	3755.24
																1.39888	1.39054	3837.46		1.4067	1.39859	4034.48		1.41262	1.40232	4082.62		1.40675	1.39734	3782.16
																1.40899	1.40065	3862.81		1.41651	1.4084	4064.71		1.42256	1.41226	4113.39		1.41664	1.40723	3808.52
																1.41886	1.41052	3887.99		1.42657	1.41846	4094.86		1.43255	1.42224	4144.1		1.42651	1.41711	3834.45
																1.42865	1.42031	3912.92		1.43658	1.42847	4124.78		1.44261	1.4323	4175.09		1.43646	1.42706	3860.41
																1.43866	1.43033	3936.97		1.44665	1.43854	4154.41		1.45226	1.44196	4206.27		1.44628	1.43687	3886.53
																1.44877	1.44044	3958.27		1.45682	1.4487	4183.92		1.46167	1.45136	4237.54		1.45576	1.44635	3912.56
																1.4587	1.45036	3975.9		1.46691	1.4588	4213.38		1.47142	1.46111	4268.84		1.4654	1.456	3938.59
																1.46856	1.46023	3989.88		1.47693	1.46882	4242.75		1.48178	1.47148	4300.03		1.47577	1.46636	3964.71
																1.47725	1.46891	4000.43		1.48686	1.47875	4271.81		1.49211	1.4818	4331.12		1.48631	1.47691	3990.74
																1.4817	1.47336	4007.48		1.49681	1.4887	4300.63		1.50236	1.49205	4362.3		1.49635	1.48695	4016.62
																1.48329	1.47496	4010.91		1.50667	1.49856	4329.07		1.51254	1.50224	4393.78		1.50629	1.49689	4042.65
																1.48499	1.47666	4007.39		1.51651	1.5084	4357.19		1.5225	1.5122	4425.47		1.51649	1.50709	4069.09
																1.48547	1.47713	4000.57		1.52648	1.51837	4385.16		1.53256	1.52225	4457.08		1.52659	1.51718	4095.61
																1.48576	1.47742	3991.2		1.53659	1.52848	4413.07		1.54274	1.53243	4488.45		1.53649	1.52709	4121.87
																1.48591	1.47758	3981.25		1.54666	1.53854	4440.86		1.55277	1.54246	4519.45		1.54647	1.53707	4147.86
																1.48601	1.47768	3971.6		1.55663	1.54852	4468.43		1.5626	1.5523	4549.99		1.55659	1.54718	4173.67
																1.48608	1.47774	3962.27		1.56676	1.55865	4495.72		1.57255	1.56225	4580.21		1.56664	1.55723	4199.18
																1.48611	1.47777	3953.24		1.57701	1.5689	4522.72		1.5827	1.5724	4610.14		1.57666	1.56726	4224.44
																1.48612	1.47778	3944.53		1.58704	1.57893	4549.67		1.5928	1.5825	4639.65		1.58676	1.57736	4249.54
																1.48613	1.47779	3936.16		1.59695	1.58884	4576.48		1.60273	1.59242	4668.72		1.5967	1.5873	4274.48
																1.48612	1.47779	3928.1		1.60676	1.59865	4603.19		1.61266	1.60236	4697.46		1.6066	1.5972	4299.26
																1.48613	1.47779	3920.37		1.61659	1.60848	4629.89		1.62278	1.61248	4725.77		1.6167	1.60729	4323.84
																1.48612	1.47778	3912.92		1.62653	1.61842	4656.56		1.63285	1.62255	4753.39		1.62686	1.61746	4348.04
																1.48611	1.47778	3905.76		1.6366	1.62849	4683		1.64276	1.63245	4780.35		1.63678	1.62738	4371.68
																1.48611	1.47778	3898.83		1.64662	1.63851	4709.19		1.65278	1.64248	4806.77		1.64673	1.63732	4394.93
																1.48611	1.47777	3892.15		1.65664	1.64853	4735.29		1.66276	1.65245	4832.59		1.65698	1.64758	4418.04
																				1.66687	1.65876	4761.34		1.67259	1.66229	4857.81		1.66698	1.65757	4441.04
																				1.67699	1.66888	4787.33		1.68258	1.67228	4882.62		1.67669	1.66728	4463.84
																				1.68689	1.67878	4813.35		1.69278	1.68248	4906.84		1.6865	1.67709	4486.41
																				1.69679	1.68868	4839.36		1.70276	1.69246	4930.23		1.69656	1.68715	4508.69
																				1.70673	1.69861	4865.22		1.71267	1.70237	4952.81		1.70662	1.69722	4530.53
																				1.71657	1.70846	4890.87		1.72294	1.71264	4974.77		1.71671	1.70731	4551.86
																				1.7266	1.71849	4916.26		1.73305	1.72275	4996.17		1.72687	1.71747	4572.88
																				1.73672	1.72861	4940.06		1.74278	1.73248	5016.91		1.73693	1.72753	4593.63
																				1.74665	1.73854	4960.45		1.75251	1.74221	5036.89		1.74695	1.73754	4614.1
																				1.75662	1.74851	4976.93		1.76251	1.7522	5056.08		1.75685	1.74745	4634.24
																				1.76667	1.75856	4989.66		1.77253	1.76223	5074.36		1.76675	1.75734	4653.94
																				1.77429	1.76617	4998.67		1.78262	1.77232	5091.59		1.77658	1.76717	4673.08
																				1.7774	1.76929	5003.79		1.7928	1.78249	5107.91		1.78643	1.77702	4691.74
																				1.77857	1.77046	5005.08		1.80291	1.79261	5123.29		1.79646	1.78705	4710.08
																				1.77945	1.77133	5002.77		1.81296	1.80266	5137.89		1.80661	1.7972	4728.13
																				1.78012	1.77201	4996.84		1.82294	1.81264	5151.53		1.81667	1.80727	4745.8
																				1.78054	1.77243	4987.37		1.83289	1.82259	5164.14		1.82666	1.81725	4762.95
																				1.78079	1.77268	4975.91		1.84283	1.83253	5175.73		1.83681	1.82741	4779.53
																				1.78094	1.77283	4964.38		1.85273	1.84242	5186.44		1.847	1.8376	4795.48
																				1.78103	1.77292	4953.31		1.86268	1.85238	5196.55		1.857	1.84759	4810.85
																				1.78108	1.77297	4942.61		1.87273	1.86242	5206.2		1.8669	1.8575	4825.71
																				1.78111	1.773	4932.26		1.88276	1.87246	5215.4		1.87673	1.86733	4840.16
																				1.78113	1.77302	4922.29		1.89272	1.88242	5224.26		1.88658	1.87718	4854.31
																				1.78114	1.77302	4912.72		1.90278	1.89248	5232.99		1.89655	1.88714	4868.2
																				1.78113	1.77302	4903.51		1.91296	1.90266	5241.53		1.90664	1.89724	4881.76
																				1.78113	1.77302	4894.64		1.92291	1.91261	5250.16		1.91665	1.90725	4895.1
																				1.78113	1.77302	4886.11		1.93274	1.92243	5259.04		1.92666	1.91726	4908.45
																				1.78112	1.77301	4877.87		1.94258	1.93227	5268.24		1.93689	1.92748	4921.82
																				1.78112	1.773	4869.92		1.95251	1.9422	5277.94		1.94697	1.93756	4935.22
																				1.78111	1.773	4862.23		1.96254	1.95224	5288.25		1.9569	1.9475	4948.75
																				1.7811	1.77299	4854.77		1.97264	1.96234	5298.99		1.96685	1.95744	4962.39
																				1.78109	1.77298	4847.55		1.98264	1.97233	5310.22		1.97672	1.96731	4975.99
																				1.78109	1.77297	4840.55		1.99264	1.98234	5322.07		1.98651	1.97711	4989.48
																								2.00292	1.99262	5334.67		1.99654	1.98714	5002.87
																								2.01305	2.00275	5347.98		2.00669	1.99729	5016.17
																								2.02294	2.01264	5362.08		2.01665	2.00725	5029.42
																								2.03281	2.02251	5377.02		2.02669	2.01729	5042.77
																								2.04274	2.03244	5392.6		2.03682	2.02741	5056.38
																								2.05258	2.04228	5408.63		2.04677	2.03737	5070.02
																								2.06258	2.05228	5425.01		2.05657	2.04717	5083.39
																								2.07276	2.06246	5441.8		2.06654	2.05714	5096.6
																								2.08278	2.07248	5458.9		2.07678	2.06737	5109.89
																								2.09279	2.08249	5476.34		2.08693	2.07753	5123.13
																								2.10291	2.09261	5494.18		2.09683	2.08743	5136.32
																								2.11298	2.10268	5512.28		2.10673	2.09733	5149.48
																								2.12281	2.11251	5530.38		2.11685	2.10744	5162.55
																								2.13261	2.12231	5548.51		2.12689	2.11749	5175.33
																								2.14267	2.13236	5566.9		2.13675	2.12735	5187.93
																								2.15275	2.14245	5585.54		2.14678	2.13738	5200.61
																								2.16264	2.15234	5604.38		2.15678	2.14738	5213.44
																								2.17258	2.16228	5623.52		2.16662	2.15722	5226.42
																								2.18268	2.17238	5642.91		2.17659	2.16719	5239.59
																								2.19276	2.18246	5662.34		2.1868	2.1774	5252.85
																								2.20273	2.19243	5681.79		2.1968	2.18739	5266.04
																								2.21281	2.2025	5701.38		2.20666	2.19725	5279.24
																								2.22283	2.21252	5721.08		2.21687	2.20747	5292.58
																								2.23268	2.22238	5740.83		2.227	2.2176	5306.14
																								2.24265	2.23235	5760.67		2.23681	2.22741	5319.78
																								2.25288	2.24258	5780.51		2.24655	2.23714	5333.41
																								2.26289	2.25258	5800.07		2.25649	2.24709	5346.98
																								2.27271	2.26241	5819.36		2.26648	2.25708	5360.39
																								2.28288	2.27257	5838.67		2.27656	2.26716	5373.47
																								2.29308	2.28277	5858.1		2.28676	2.27736	5386.37
																								2.30289	2.29258	5877.61		2.29691	2.28751	5399.24
																								2.31256	2.30226	5897.09		2.30697	2.29756	5412.05
																								2.32253	2.31223	5916.51		2.31696	2.30756	5424.72
																								2.33261	2.32231	5935.74		2.32692	2.31752	5437.14
																								2.3427	2.3324	5953.81		2.33682	2.32742	5449.21
																								2.35284	2.34254	5969.03		2.3467	2.3373	5460.94
																								2.36295	2.35265	5980.89		2.35665	2.34724	5472.45
																								2.37297	2.36266	5989.38		2.36671	2.35731	5483.8
																								2.38171	2.37141	5994.45		2.37677	2.36736	5495
																								2.3865	2.37619	5996.05		2.38669	2.37729	5505.95
																								2.38871	2.3784	5994.16		2.39674	2.38734	5516.6
																								2.39024	2.37993	5988.88		2.4069	2.3975	5526.98
																								2.39144	2.38114	5980.36		2.4169	2.4075	5537.15
																								2.39231	2.38201	5968.77		2.42677	2.41736	5547.08
																								2.39287	2.38256	5954.99		2.43659	2.42719	5556.79
																								2.39318	2.38287	5940.9		2.44655	2.43715	5566.41
																								2.39335	2.38305	5927.27		2.4566	2.44719	5576
																								2.39346	2.38316	5914.15		2.46669	2.45728	5585.4
																								2.39352	2.38322	5901.5		2.47664	2.46724	5594.53
																								2.39356	2.38326	5889.36		2.4866	2.4772	5603.52
																								2.39358	2.38328	5877.74		2.49683	2.48743	5612.44
																								2.39359	2.38329	5866.66		2.50699	2.49759	5621.25
																								2.39359	2.38329	5856.09		2.51691	2.50751	5630.09
																								2.39359	2.38329	5846.01		2.52678	2.51738	5639.02
																								2.39359	2.38329	5836.37		2.53672	2.52732	5647.91
																								2.39359	2.38328	5827.14		2.54659	2.53718	5656.67
																								2.39358	2.38327	5818.3		2.55662	2.54722	5665.3
																								2.39357	2.38327	5809.8		2.56679	2.55738	5673.9
																								2.39356	2.38326	5801.63		2.5768	2.5674	5682.47
																								2.39356	2.38326	5793.75		2.58681	2.57741	5691.14
																								2.39355	2.38324	5786.15		2.59694	2.58753	5699.99
																								2.39354	2.38324	5778.8		2.60696	2.59756	5708.93
																								2.39354	2.38323	5771.69		2.61677	2.60737	5717.63
																								2.39353	2.38322	5764.81		2.62662	2.61722	5726.15
																								2.39352	2.38322	5758.14		2.63671	2.62731	5734.71
																												2.64683	2.63743	5743.29
																												2.65675	2.64735	5751.81
																												2.66663	2.65723	5760.36
																												2.6767	2.66729	5768.92
																												2.68678	2.67738	5777.27
																												2.69672	2.68732	5785.36
																												2.70677	2.69737	5793.36
																												2.71683	2.70742	5801.34
																												2.7267	2.7173	5809.22
																												2.73663	2.72722	5817.08
																												2.74684	2.73744	5824.8
																												2.7569	2.7475	5832.2
																												2.76672	2.75732	5839.25
																												2.77685	2.76744	5846.18
																												2.78705	2.77765	5853.11
																												2.79688	2.78748	5860.05
																												2.80659	2.79718	5866.89
																												2.81657	2.80717	5873.64
																												2.82663	2.81723	5880.21
																												2.8367	2.8273	5886.48
																												2.84682	2.83742	5892.62
																												2.85692	2.84752	5898.79
																												2.86691	2.85751	5905.02
																												2.87686	2.86745	5911.23
																												2.88681	2.87741	5917.4
																												2.89672	2.88732	5923.42
																												2.90655	2.89715	5929.28
																												2.91647	2.90706	5935.12
																												2.92654	2.91714	5941.05
																												2.93668	2.92728	5947.03
																												2.94668	2.93728	5952.94
																												2.95673	2.94733	5958.71
																												2.96697	2.95757	5964.29
																												2.97708	2.96768	5969.73
																												2.98701	2.9776	5975.06
																												2.99685	2.98745	5980.27
																												3.00665	2.99725	5985.46
																												3.01656	3.00715	5990.71
																												3.02665	3.01725	5995.85
																												3.03668	3.02727	6000.83
																												3.04663	3.03723	6005.77
																												3.05682	3.04742	6010.81
																												3.06701	3.05761	6015.88
																												3.07695	3.06755	6021.03
																												3.08685	3.07745	6026.32
																												3.09681	3.0874	6031.63
																												3.10664	3.09724	6036.85
																												3.11657	3.10717	6041.97
																												3.12668	3.11728	6047.06
																												3.13671	3.12731	6052.09
																												3.14661	3.13721	6057.11
																												3.15677	3.14737	6062.24
																												3.16691	3.15751	6067.44
																												3.1768	3.16739	6072.38
																												3.18663	3.17723	6077
																												3.19673	3.18733	6081.55
																												3.20697	3.19757	6086.05
																												3.21694	3.20754	6090.37
																												3.22678	3.21738	6094.61
																												3.23679	3.22738	6098.78
																												3.24691	3.23751	6102.62
																												3.25684	3.24743	6106
																												3.26679	3.25739	6109.13
																												3.27684	3.26744	6112.11
																												3.28673	3.27733	6114.88
																												3.29653	3.28713	6117.41
																												3.30665	3.29724	6119.68
																												3.31684	3.30744	6121.51
																												3.32678	3.31737	6122.81
																												3.33681	3.3274	6123.8
																												3.34705	3.33765	6124.71
																												3.36663	3.35723	6126.25
																												3.38656	3.37716	6127.16
																												3.39662	3.38721	6127.31
																												3.40674	3.39733	6127.26
																												3.41688	3.40748	6127.16
																												3.42693	3.41752	6127.09
																												3.43698	3.42758	6126.91
																												3.45692	3.44752	6125.97
																												3.47673	3.46733	6124.14
																												3.48671	3.4773	6123.14
																												3.49675	3.48735	6122.14
																												3.50675	3.49735	6121.12
																												3.51668	3.50728	6119.99
																												3.5268	3.5174	6118.73
																												3.53698	3.52758	6117.42
																												3.54693	3.53753	6116.13
																												3.55677	3.54737	6114.77
																												3.56661	3.5572	6113.38
																												3.57653	3.56713	6112.08
																												3.58664	3.57723	6110.73
																												3.59671	3.58731	6109.15
																												3.60667	3.59727	6107.38
																												3.61677	3.60737	6105.58
																												3.62704	3.61763	6103.74
																												3.63703	3.62763	6101.83
																												3.64689	3.63749	6099.97
																												3.65683	3.64742	6098.11
																												3.66671	3.65731	6096.16
																												3.67662	3.66722	6094.08
																												3.68676	3.67735	6091.91
																												3.69689	3.68748	6089.72
																												3.70681	3.6974	6087.54
																												3.71689	3.70748	6085.48
																												3.72701	3.71761	6083.56
																												3.73693	3.72753	6081.6
																												3.74672	3.73732	6079.51
																												3.75669	3.74729	6077.45
																												3.76682	3.75741	6075.49
																												3.77678	3.76737	6073.59
																												3.78664	3.77724	6071.79
																												3.79664	3.78724	6070.15
																												3.80676	3.79735	6068.53
																												3.81677	3.80737	6066.74
																												3.82676	3.81735	6064.93
																												3.83686	3.82745	6063.12
																												3.84679	3.83738	6061.21
																												3.85663	3.84722	6059.24
																												3.86673	3.85733	6057.21
																												3.87696	3.86755	6054.95
																												3.88686	3.87745	6052.23
																												3.89676	3.88736	6049.2
																												3.90703	3.89763	6046.08
																												3.9171	3.9077	6042.94
																												3.92684	3.91744	6039.72
																												3.93662	3.92721	6036.46
																												3.94662	3.93722	6033.19
																												3.95667	3.94727	6029.76
																												3.96677	3.95737	6026.13
																												3.9769	3.9675	6022.21
																												3.98694	3.97754	6018.25
																												3.99698	3.98758	6014.29
																												4.00688	3.99748	6010.27
																												4.01678	4.00738	6006.1
																												4.02666	4.01725	6001.73
																												4.03652	4.02712	5997.24
																												4.04655	4.03714	5992.76
																												4.05668	4.04728	5988.33
																												4.06671	4.0573	5983.97
																												4.0767	4.0673	5979.83
																												4.08687	4.07747	5975.75
																												4.09706	4.08766	5971.66
																												4.10706	4.09765	5967.61
																												4.11694	4.10753	5963.58
																												4.1268	4.1174	5959.62
																												4.13668	4.12728	5955.79
																												4.14666	4.13725	5952.02
																												4.15668	4.14728	5948.18
																												4.16666	4.15725	5944.29
																												4.17672	4.16731	5940.44
																												4.187	4.1776	5936.64
																												4.19705	4.18765	5932.91
																												4.20697	4.19757	5929.32
																												4.21689	4.20749	5925.83
																												4.22675	4.21735	5922.29
																												4.23657	4.22717	5918.64
																												4.24662	4.23721	5914.93
																												4.25675	4.24734	5911.2
																												4.26669	4.25729	5907.43
																												4.27671	4.2673	5903.75
																												4.28688	4.27747	5900.23
																												4.29692	4.28752	5896.66
																												4.3067	4.2973	5892.84
																												4.31662	4.30722	5888.87
																												4.32682	4.31742	5884.83
																												4.33693	4.32753	5880.68
																												4.34682	4.33741	5876.41
																												4.35678	4.34737	5872.11
																												4.36687	4.35747	5867.7
																												4.37689	4.36749	5862.99
																												4.38678	4.37738	5858.07
																												4.39684	4.38743	5853.15
																												4.40684	4.39743	5848.21
																												4.41666	4.40726	5843.24
																												4.42661	4.4172	5838.34
																												4.43684	4.42743	5833.39
																												4.44686	4.43746	5828.19
																												4.45671	4.44731	5822.82
																												4.46691	4.45751	5817.49
																												4.47705	4.46765	5812.26
																												4.48681	4.4774	5807.06
																												4.49654	4.48714	5801.83
																												4.50654	4.49714	5796.57
																												4.51655	4.50715	5791.24
																												4.52662	4.51722	5785.76
																												4.53681	4.5274	5780.29
																												4.54691	4.53751	5775
																												4.55695	4.54755	5769.89
																												4.56696	4.55756	5764.91
																												4.57692	4.56752	5759.99
																												4.58679	4.57739	5755.11
																												4.59666	4.58726	5750.32
																												4.60665	4.59725	5745.74
																												4.61673	4.60733	5741.4
																												4.62677	4.61736	5737.33
																												4.63671	4.62731	5733.4
																												4.64678	4.63738	5729.51
																												4.65698	4.64758	5725.63
																												4.66703	4.65763	5721.78
																												4.67692	4.66752	5717.96
																												4.68672	4.67731	5714.14
																												4.69662	4.68722	5710.38
																												4.70662	4.69722	5706.68
																												4.71668	4.70728	5702.9
																												4.72665	4.71725	5698.97
																												4.73665	4.72724	5695
																												4.74689	4.73748	5691.09
																												4.75702	4.74761	5687.21
																												4.76694	4.75754	5683.44
																												4.77684	4.76744	5679.79
																												4.78679	4.77739	5676.19
																												4.79665	4.78725	5672.56
																												4.80665	4.79724	5668.9
																												4.81679	4.80739	5665.26
																												4.82682	4.81741	5661.63
																												4.83681	4.82741	5658.07
																												4.84695	4.83754	5654.62
																												4.85704	4.84764	5651.19
																												4.86687	4.85746	5647.55
																												4.8767	4.86729	5643.76
																												4.88675	4.87735	5640
																												4.89683	4.88742	5636.23
																												4.90673	4.89733	5632.42
																												4.91663	4.90723	5628.65
																												4.92672	4.91732	5624.92
																												4.93681	4.92741	5621.09
																												4.94676	4.93736	5617.17
																												4.95681	4.9474	5613.31
																												4.96683	4.95743	5609.53
																												4.9767	4.9673	5605.78
																												4.98665	4.97724	5602.08
																												4.99689	4.98749	5598.36
																												5.00695	4.99755	5594.47
																												5.01679	5.00738	5590.41
																												5.02691	5.01751	5586.38
																												5.03713	5.02772	5580.48
																												5.04695	5.03755	5573.42
																												5.05663	5.04723	5566.36
																												5.06658	5.05717	5559.35
																												5.07661	5.06721	5552.32
																												5.08668	5.07727	5542.66
																												5.09685	5.08744	5267.51

## Sheet: ESIN 7
ESIN 7 (1000 N)				ESIN 7 (1500 N)				ESIN 7 (2000 N)				ESIN 7 (3000 N)				ESIN 7 (4000 N)				ESIN 7 (5000 N)				ESIN 7 (6000 N)
Standard travel	Displacement corrected	Standard force		Standard travel	Displacement corrected	Standard force		Standard travel	Displacement corrected	Standard force		Standard travel	Displacement corrected	Standard force		Standard travel	Displacement corrected	Standard force		Standard travel	Displacement corrected	Standard force		Standard travel	Displacement corrected	Standard force
mm	mm	N		mm	mm	N		mm	mm	N		mm	mm	N		mm	mm	N		mm	mm	N		mm	mm	N
0	-0.0829035	98.9458		0	-0.063703	113.205		0	-0.0658743	108.565		0	-0.0710579	113.597		0	-0.0854323	105.011		0	-0.0998996	102.18		0	-0.0258651	124.323
-2.58565e-06	-0.0829061	97.8916		-1.12224e-05	-0.0637142	112.041		-6.11544e-07	-0.0658749	107.411		-9.41992e-06	-0.0710673	112.445		-3.32594e-07	-0.0854326	103.893		-5.10693e-06	-0.0999048	101.105		-5.38588e-06	-0.0258705	123.306
-4.24862e-06	-0.0829077	96.702		-1.34969e-05	-0.0637165	110.97		-4.55976e-06	-0.0658789	106.341		-1.45805e-05	-0.0710725	111.39		-3.39031e-06	-0.0854357	102.879		-4.18425e-06	-0.0999038	99.9745		-2.01702e-06	-0.0258672	122.173
-5.07474e-06	-0.0829086	95.5752		-1.94407e-05	-0.0637224	109.655		-3.21865e-06	-0.0658775	105.338		-2.10607e-05	-0.071079	110.103		-1.35183e-06	-0.0854336	101.751		-6.75917e-07	-0.0999003	98.9661		-2.75731e-06	-0.0258679	121.094
-6.41584e-06	-0.0829099	94.5143		-2.59423e-05	-0.0637289	108.436		-6.48022e-06	-0.0658808	104.21		-2.57063e-05	-0.0710836	108.927		-2.24233e-06	-0.0854345	100.724		-3.9053e-06	-0.0999036	97.8965		-1.3411e-06	-0.0258665	120.086
-4.4632e-06	-0.082908	93.3699		-2.70581e-05	-0.0637301	107.317		-1.15979e-05	-0.0658859	103.195		-2.89142e-05	-0.0710868	107.832		-5.1713e-06	-0.0854375	99.6672		5.52535e-06	-0.0998941	96.8194		8.47578e-07	-0.0258643	118.971
2.41399e-06	-0.0829011	92.2911		-3.12424e-05	-0.0637342	106.265		-3.0148e-06	-0.0658773	102.063		-2.99656e-05	-0.0710879	106.823		0.0026484	-0.0827839	99.884		0.00382729	-0.0960724	97.9205		1.42694e-06	-0.0258637	117.897
0.00374958	-0.0791539	93.711		-3.43001e-05	-0.0637373	105.048		0.00434188	-0.0615324	103.53		-3.16823e-05	-0.0710896	105.658		0.00532942	-0.0801029	101.479		0.0058115	-0.0940882	99.0845		0.00294066	-0.0229245	119.442
0.00577258	-0.0771309	95.3693		-2.70581e-05	-0.0637301	103.938		0.00638738	-0.0594869	105.153		-3.45147e-05	-0.0710924	104.577		0.00759103	-0.0778413	103.094		0.00815318	-0.0917465	100.616		0.00469968	-0.0211655	121.473
0.00690368	-0.0759998	96.4114		0.00469702	-0.059006	105.442		0.00883634	-0.057038	107.232		0.00379516	-0.0672628	105.254		0.0102392	-0.0751931	105.081		0.0108961	-0.0890036	102.458		0.00572477	-0.0201404	122.794
0.00812459	-0.0747789	97.5801		0.00684765	-0.0568553	107.112		0.0102084	-0.055666	108.413		0.00574971	-0.0653082	106.592		0.0117162	-0.0737161	106.189		0.0124088	-0.0874908	103.475		0.00683778	-0.0190274	124.314
0.00945059	-0.0734529	98.8519		0.00808499	-0.055618	108.124		0.0117116	-0.0541627	109.676		0.0080913	-0.0629666	108.384		0.0132885	-0.0721438	107.364		0.0140203	-0.0858793	104.547		0.00806355	-0.0178016	126.027
0.0108768	-0.0720267	100.199		0.00941909	-0.0542839	109.241		0.0133041	-0.0525702	111.024		0.00940723	-0.0616507	109.42		0.0149465	-0.0704858	108.607		0.0157254	-0.0841742	105.678		0.00937793	-0.0164872	127.917
0.012395	-0.0705084	101.622		0.0108607	-0.0528422	110.449		0.01499	-0.0508843	112.446		0.0108092	-0.0602487	110.536		0.0167163	-0.068716	109.911		0.0175419	-0.0823577	106.862		0.0108011	-0.015064	129.959
0.0140011	-0.0689024	103.101		0.0123924	-0.0513105	111.731		0.0167547	-0.0491196	113.947		0.0123176	-0.0587403	111.724		0.0186025	-0.0668298	111.274		0.0194558	-0.0804438	108.082		0.0123278	-0.0135374	132.156
0.0157187	-0.0671848	104.626		0.0140313	-0.0496717	113.086		0.0186217	-0.0472526	115.52		0.0139344	-0.0571235	112.977		0.0205836	-0.0648487	112.691		0.0214799	-0.0784198	109.341		0.0139458	-0.0119193	134.487
0.0175612	-0.0653423	106.184		0.0157743	-0.0479287	114.511		0.0205925	-0.0452818	117.166		0.0156768	-0.0553811	114.303		0.0226796	-0.0627526	114.152		0.0236003	-0.0762994	110.639		0.0156737	-0.0101914	136.947
0.0194945	-0.063409	107.782		0.0175976	-0.0461054	116		0.0226554	-0.0432189	118.875		0.0174957	-0.0535622	115.684		0.0248938	-0.0605385	115.644		0.0258297	-0.0740699	111.973		0.0175172	-0.00834793	139.536
0.0215358	-0.0613677	109.427		0.0195124	-0.0441906	117.546		0.0248257	-0.0410487	120.634		0.0194322	-0.0516257	117.123		0.0272074	-0.0582249	117.168		0.0281567	-0.071743	113.339		0.0194687	-0.00639639	142.254
0.0236642	-0.0592393	111.109		0.0215283	-0.0421747	119.152		0.02713	-0.0387443	122.439		0.0214758	-0.0495821	118.606		0.0295997	-0.0558326	118.721		0.03058	-0.0693196	114.735		0.0214984	-0.00436678	145.088
0.0258646	-0.0570389	112.834		0.0236309	-0.0400721	120.808		0.0295595	-0.0363149	124.275		0.0235994	-0.0474585	120.135		0.0320875	-0.0533448	120.301		0.033097	-0.0668027	116.151		0.0236341	-0.00223104	148.046
0.0281767	-0.0547268	114.595		0.0258274	-0.0378756	122.513		0.0320871	-0.0337873	126.144		0.0258184	-0.0452395	121.708		0.0346521	-0.0507802	121.914		0.0357075	-0.0641921	117.588		0.0258651	0	151.122
0.0305993	-0.0523041	116.386		0.0281468	-0.0355562	124.26		0.0347092	-0.0311651	128.049		0.028136	-0.042922	123.332		0.0373132	-0.0481191	123.545		0.0384452	-0.0614544	119.027		0.028177	0.00231189	154.316
0.0330936	-0.0498099	118.203		0.0305742	-0.0331288	126.053		0.0374025	-0.0284718	130.002		0.0305402	-0.0405177	125.005		0.0400871	-0.0453452	125.197		0.0413077	-0.0585919	120.489		0.0305733	0.00470817	157.632
0.0357039	-0.0471996	120.038		0.0331017	-0.0306013	127.9		0.0401707	-0.0257037	132.005		0.0330416	-0.0380164	126.719		0.0429562	-0.0424761	126.873		0.0442933	-0.0556063	121.984		0.0330566	0.00719145	161.06
0.038429	-0.0444745	121.912		0.0357231	-0.0279799	129.792		0.0430123	-0.022862	134.053		0.0356736	-0.0353843	128.478		0.0459665	-0.0394658	128.574		0.0473472	-0.0525524	123.51		0.0356648	0.00979965	164.607
0.0412588	-0.0416447	123.841		0.0384309	-0.0252721	131.742		0.0459529	-0.0199215	136.137		0.0384164	-0.0326415	130.262		0.0490819	-0.0363504	130.313		0.050439	-0.0494606	125.065		0.0383903	0.0125252	168.28
0.0441737	-0.0387298	125.819		0.0412372	-0.0224657	133.745		0.0490391	-0.0168353	138.259		0.0412821	-0.0297758	132.094		0.0522718	-0.0331605	132.095		0.0536122	-0.0462875	126.652		0.041229	0.0153638	172.084
0.0471545	-0.035749	127.839		0.0441192	-0.0195838	135.812		0.0522446	-0.0136297	140.432		0.0442326	-0.0268253	133.969		0.0555441	-0.0298882	133.924		0.0568908	-0.0430088	128.263		0.0441456	0.0182805	176.032
0.0502257	-0.0326777	129.902		0.0471185	-0.0165845	137.945		0.0555341	-0.0103402	142.66		0.0472423	-0.0238156	135.9		0.0589372	-0.0264951	135.791		0.060319	-0.0395807	129.904		0.0471604	0.0212952	180.125
0.0533949	-0.0295086	131.996		0.0502552	-0.0134478	140.15		0.0588925	-0.00698185	144.967		0.0503359	-0.020722	137.888		0.0624572	-0.0229751	137.697		0.0638621	-0.0360376	131.594		0.050278	0.0244128	184.337
0.0567422	-0.0261612	134.121		0.0534862	-0.0102168	142.432		0.0623221	-0.00355219	147.329		0.0535247	-0.0175333	139.93		0.0660901	-0.0193422	139.645		0.06747	-0.0324297	133.339		0.05353	0.0276648	188.661
0.0602306	-0.0226729	136.284		0.0567897	-0.00691334	144.799		0.0658743	0	149.757		0.0568363	-0.0142216	142.024		0.0698187	-0.0156136	141.659		0.0711312	-0.0287685	135.149		0.0569298	0.0310646	193.089
0.0637852	-0.0191183	138.482		0.0601938	-0.00350919	147.244		0.069587	0.00371271	152.251		0.0602664	-0.0107915	144.179		0.0735707	-0.0118616	143.744		0.0748785	-0.0250211	136.994		0.0604195	0.0345543	197.628
0.0673708	-0.0155327	140.724		0.063703	0	149.761		0.0734074	0.00753305	154.803		0.063777	-0.00728091	146.403		0.0773755	-0.00805675	145.877		0.0787608	-0.0211388	138.886		0.0639485	0.0380834	202.277
0.0710604	-0.0118431	142.992		0.0673212	0.00361821	152.35		0.0772892	0.0114149	157.436		0.0673686	-0.00368936	148.698		0.0813219	-0.00411039	148.051		0.0828133	-0.0170863	140.83		0.0675318	0.0416667	207.02
0.0748782	-0.00802529	145.293		0.0710934	0.00739037	155.003		0.0812667	0.0153924	160.147		0.0710579	0	151.066		0.0854323	0	150.271		0.0869537	-0.0129459	142.831		0.071194	0.0453289	211.83
0.0788492	-0.00405432	147.628		0.0749521	0.0112491	157.743		0.0853267	0.0194523	162.93		0.0749008	0.00384291	153.491		0.0896389	0.00420665	152.548		0.0911582	-0.00874148	144.881		0.0750023	0.0491372	216.702
0.0829035	0	149.987		0.0788518	0.0151488	160.563		0.0895364	0.0236621	165.802		0.0789025	0.00784458	155.992		0.0938417	0.00840946	154.891		0.0954617	-0.00443796	146.986		0.0789423	0.0530772	221.63
0.0870008	0.00409728	152.37		0.0827977	0.0190947	163.462		0.093884	0.0280096	168.769		0.0829738	0.0119159	158.564		0.0981118	0.0126795	157.3		0.0998996	0	149.147		0.08293	0.0570648	226.604
0.0912208	0.00831734	154.789		0.0868543	0.0231514	166.453		0.0982889	0.0324146	171.814		0.0870459	0.015988	161.214		0.102547	0.0171151	159.788		0.104481	0.00458175	151.355		0.0869368	0.0610716	231.63
0.0956049	0.0127014	157.25		0.0910579	0.0273549	169.54		0.102719	0.0368444	174.965		0.0911741	0.0201162	163.937		0.10714	0.0217081	162.346		0.109122	0.00922195	153.609		0.0910279	0.0651628	236.746
0.100101	0.0171973	159.755		0.0953723	0.0316693	172.716		0.107244	0.0413697	178.228		0.095468	0.02441	166.74		0.111794	0.0263621	164.958		0.113789	0.013889	155.911		0.0952682	0.0694031	242.019
0.104633	0.0217299	162.322		0.099763	0.03606	175.974		0.111934	0.0460594	181.6		0.0998914	0.0288334	169.613		0.116541	0.0311087	167.616		0.11859	0.0186902	158.287		0.0996007	0.0737355	247.461
0.109215	0.0263114	164.969		0.104296	0.0405934	179.331		0.116698	0.050824	185.049		0.104396	0.0333379	172.541		0.12145	0.0360178	170.35		0.123555	0.0236555	160.731		0.103928	0.0780626	253.049
0.113903	0.0309995	167.725		0.109013	0.0453096	182.806		0.121539	0.0556647	188.552		0.108962	0.0379041	175.533		0.126528	0.0410954	173.179		0.128614	0.0287141	163.23		0.108395	0.0825303	258.763
0.118709	0.0358055	170.593		0.113815	0.0501124	186.399		0.126562	0.060688	192.14		0.113674	0.0426159	178.617		0.131625	0.0461926	176.098		0.13374	0.03384	165.787		0.1132	0.087335	264.631
0.123576	0.0406722	173.573		0.118624	0.054921	190.077		0.131769	0.0658946	195.835		0.11852	0.0474625	181.817		0.136735	0.0513023	179.121		0.138992	0.0390922	168.427		0.118293	0.0924279	270.632
0.128514	0.0456105	176.674		0.123498	0.0597955	193.85		0.136945	0.0710706	199.624		0.123425	0.0523667	185.12		0.141966	0.0565335	182.24		0.14436	0.0444603	171.135		0.123368	0.0975031	276.771
0.133629	0.050725	179.918		0.128551	0.0648479	197.73		0.142062	0.0761878	203.499		0.128394	0.0573357	188.508		0.147337	0.0619043	185.439		0.149747	0.0498477	173.903		0.128402	0.102537	283.066
0.138893	0.0559897	183.304		0.133702	0.0699987	201.689		0.147363	0.0814884	207.473		0.133537	0.0624793	191.975		0.152819	0.0673866	188.694		0.155174	0.0552742	176.738		0.133548	0.107683	289.535
0.144216	0.0613126	186.821		0.138864	0.0751614	205.744		0.152872	0.0869975	211.54		0.138868	0.0678104	195.52		0.158503	0.0730711	192.017		0.160784	0.0608846	179.628		0.138806	0.112941	296.149
0.149591	0.0666871	190.47		0.144141	0.0804377	209.916		0.158416	0.0925417	215.693		0.144268	0.0732104	199.145		0.164365	0.0789325	195.414		0.166495	0.0665953	182.586		0.144151	0.118286	302.828
0.155134	0.0722301	194.28		0.149585	0.0858819	214.217		0.164065	0.0981904	219.963		0.149701	0.0786427	202.859		0.170206	0.0847733	198.912		0.172217	0.072317	185.616		0.14961	0.123745	309.538
0.160782	0.0778786	198.251		0.155141	0.0914377	218.627		0.169861	0.103987	224.395		0.155218	0.0841604	206.681		0.176009	0.0905768	202.507		0.178086	0.0781859	188.721		0.155232	0.129367	316.315
0.166443	0.0835394	202.376		0.16073	0.097027	223.137		0.175716	0.109842	228.981		0.160809	0.0897514	210.597		0.181934	0.0965012	206.177		0.184093	0.0841932	191.894		0.160916	0.135051	323.188
0.172172	0.0892683	206.663		0.166472	0.102769	227.776		0.181669	0.115795	233.686		0.166495	0.0954369	214.6		0.187958	0.102526	209.92		0.190148	0.0902483	195.127		0.16662	0.140755	330.164
0.178058	0.0951543	211.111		0.172379	0.108676	232.581		0.187843	0.121969	238.508		0.172369	0.101311	218.688		0.194058	0.108626	213.742		0.196415	0.0965152	198.423		0.172391	0.146526	337.271
0.184079	0.101175	215.733		0.178256	0.114553	237.56		0.194163	0.128288	243.468		0.178362	0.107304	222.854		0.200367	0.114934	217.661		0.202877	0.102977	201.821		0.178273	0.152407	344.489
0.190226	0.107322	220.538		0.184211	0.120508	242.691		0.20049	0.134616	248.578		0.184325	0.113267	227.126		0.206714	0.121281	221.689		0.209295	0.109396	205.324		0.184235	0.158369	351.811
0.196559	0.113655	225.506		0.190331	0.126628	247.954		0.206841	0.140966	253.824		0.190363	0.119305	231.529		0.213086	0.127653	225.832		0.21575	0.115851	208.906		0.19032	0.164455	359.225
0.20292	0.120017	230.646		0.196522	0.132819	253.349		0.21325	0.147375	259.207		0.19654	0.125483	236.075		0.219653	0.134221	230.078		0.22235	0.122451	212.559		0.196576	0.170711	366.706
0.209304	0.1264	235.976		0.202928	0.139225	258.882		0.219819	0.153945	264.718		0.202765	0.131707	240.759		0.226375	0.140942	234.441		0.229144	0.129244	216.282		0.202888	0.177023	374.283
0.215874	0.132971	241.488		0.209466	0.145763	264.55		0.226613	0.160738	270.331		0.209069	0.138011	245.578		0.233176	0.147743	238.91		0.236166	0.136266	220.07		0.209286	0.18342	381.986
0.222497	0.139593	247.196		0.215894	0.152191	270.384		0.233394	0.16752	276.077		0.215568	0.14451	250.518		0.240084	0.154652	243.475		0.24321	0.14331	223.932		0.215809	0.189944	389.812
0.229144	0.14624	253.089		0.22239	0.158687	276.375		0.240203	0.174329	281.998		0.222205	0.151147	255.594		0.247035	0.161602	248.151		0.250156	0.150256	227.882		0.222356	0.196491	397.771
0.235928	0.153025	259.091		0.229074	0.165371	282.534		0.247076	0.181202	288.116		0.228949	0.157891	260.824		0.254159	0.168727	252.947		0.257171	0.157272	231.925		0.228964	0.203098	405.839
0.242831	0.159927	265.249		0.235852	0.172149	288.892		0.253996	0.188122	294.432		0.235835	0.164777	266.211		0.261419	0.175987	257.842		0.264279	0.16438	236.062		0.235753	0.209888	414.003
0.24993	0.167026	271.597		0.242765	0.179062	295.449		0.261094	0.195219	300.933		0.242773	0.171715	271.758		0.268693	0.183261	262.852		0.271555	0.171655	240.279		0.242723	0.216857	422.294
0.257193	0.17429	278.158		0.249743	0.18604	302.186		0.26839	0.202516	307.61		0.249803	0.178745	277.452		0.276057	0.190625	267.978		0.278934	0.179034	244.581		0.249866	0.224001	430.686
0.264367	0.181463	284.928		0.256819	0.193116	309.141		0.275803	0.209929	314.525		0.257012	0.185954	283.292		0.283496	0.198064	273.233		0.286356	0.186457	248.973		0.257056	0.231191	439.165
0.271594	0.188691	291.856		0.264134	0.200431	316.307		0.283343	0.217468	321.683		0.264354	0.193296	289.283		0.291015	0.205583	278.598		0.293971	0.194071	253.486		0.264225	0.23836	447.767
0.27894	0.196037	298.937		0.271594	0.207891	323.688		0.290935	0.225061	329.083		0.271778	0.20072	295.396		0.298711	0.213279	284.062		0.30173	0.201831	258.122		0.271587	0.245722	456.502
0.286545	0.203642	306.179		0.279077	0.215374	331.284		0.298618	0.232743	336.718		0.279185	0.208127	301.64		0.306554	0.221122	289.644		0.309625	0.209725	262.872		0.279023	0.253158	465.367
0.294322	0.211419	313.58		0.286574	0.222871	339.078		0.30649	0.240615	344.581		0.286657	0.215599	308.054		0.314498	0.229065	295.367		0.317563	0.217663	267.723		0.286468	0.260603	474.315
0.301963	0.219059	321.158		0.294161	0.230458	347.08		0.314535	0.248661	352.639		0.294287	0.223229	314.67		0.322481	0.237049	301.249		0.325621	0.225722	272.688		0.294057	0.268192	483.331
0.309612	0.226709	328.989		0.301951	0.238248	355.288		0.322641	0.256767	360.869		0.301883	0.230826	321.475		0.330472	0.24504	307.288		0.333841	0.233941	277.771		0.301786	0.275921	492.47
0.317404	0.234501	337.079		0.309771	0.246068	363.681		0.330687	0.264813	369.286		0.30953	0.238472	328.442		0.338612	0.25318	313.49		0.342095	0.242195	282.967		0.309757	0.283892	501.755
0.325428	0.242524	345.385		0.317614	0.253911	372.262		0.338823	0.272949	377.937		0.317364	0.246306	335.602		0.346924	0.261492	319.811		0.350415	0.250515	288.264		0.317702	0.291837	511.111
0.333607	0.250703	353.827		0.325481	0.261778	381.058		0.347095	0.28122	386.845		0.325406	0.254349	343.031		0.355395	0.269962	326.255		0.358779	0.258879	293.657		0.325586	0.299721	520.505
0.341803	0.258899	362.412		0.333441	0.269738	390.068		0.355304	0.28943	395.926		0.333641	0.262583	350.721		0.363884	0.278451	332.832		0.367179	0.267279	299.152		0.33364	0.307775	529.978
0.3502	0.267297	371.232		0.341626	0.277923	399.306		0.363612	0.297737	405.201		0.341817	0.270759	358.616		0.372443	0.287011	339.586		0.375747	0.275847	304.762		0.342021	0.316156	539.531
0.358771	0.275868	380.28		0.34999	0.286287	408.785		0.372143	0.306268	414.71		0.350038	0.278981	366.741		0.381058	0.295626	346.528		0.384479	0.284579	310.471		0.350496	0.324631	549.165
0.367365	0.284462	389.537		0.358463	0.29476	418.519		0.380952	0.315078	424.508		0.35851	0.287452	375.112		0.389753	0.304321	353.626		0.393304	0.293404	316.279		0.358768	0.332903	558.853
0.375929	0.293025	398.993		0.367003	0.3033	428.504		0.389738	0.323864	434.517		0.367317	0.29626	383.727		0.398568	0.313136	360.891		0.402073	0.302173	322.162		0.367115	0.34125	568.676
0.384655	0.301752	408.669		0.375648	0.311945	438.74		0.398499	0.332624	444.721		0.376056	0.304998	392.545		0.407549	0.322117	368.355		0.410991	0.311091	328.111		0.375643	0.349778	578.644
0.393442	0.310539	418.596		0.384505	0.320802	449.205		0.407482	0.341608	455.164		0.384652	0.313594	401.597		0.416753	0.33132	375.955		0.420172	0.320272	334.176		0.384394	0.358529	588.681
0.40228	0.319377	428.722		0.393509	0.329806	459.836		0.416842	0.350968	465.844		0.393331	0.322273	410.932		0.425905	0.340473	383.659		0.429405	0.329506	340.396		0.393182	0.367317	598.74
0.411154	0.32825	439.029		0.402516	0.338813	470.646		0.426164	0.360289	476.716		0.402222	0.331164	420.512		0.435112	0.34968	391.531		0.438466	0.338566	346.781		0.402125	0.37626	608.87
0.420111	0.337208	449.555		0.411478	0.347775	481.684		0.435372	0.369498	487.81		0.411188	0.340131	430.251		0.444638	0.359206	399.589		0.447514	0.347614	353.318		0.41129	0.385425	619.112
0.429305	0.346402	460.363		0.420568	0.356865	492.994		0.444606	0.378732	499.212		0.420212	0.349154	440.163		0.454266	0.368834	407.824		0.456825	0.356926	359.996		0.420547	0.394682	629.442
0.438734	0.35583	471.463		0.429613	0.36591	504.514		0.454029	0.388154	510.838		0.429442	0.358384	450.303		0.463702	0.378269	416.249		0.46674	0.36684	366.806		0.429802	0.403937	639.848
0.448263	0.36536	482.826		0.438743	0.37504	516.241		0.463498	0.397624	522.646		0.438834	0.367776	460.68		0.473229	0.387797	424.877		0.476816	0.376916	373.78		0.439143	0.413278	650.341
0.457757	0.374853	494.449		0.448108	0.384405	528.246		0.473122	0.407247	534.617		0.448253	0.377195	471.291		0.482972	0.397539	433.66		0.486958	0.387058	380.874		0.448495	0.42263	660.933
0.46744	0.384536	506.279		0.457762	0.394059	540.524		0.483	0.417126	546.774		0.457805	0.386747	482.144		0.492792	0.407359	442.551		0.496898	0.396998	388.069		0.457899	0.432034	671.585
0.477385	0.394482	518.262		0.46736	0.403657	552.985		0.492934	0.427059	559.119		0.467492	0.396434	493.265		0.502726	0.417293	451.551		0.506722	0.406822	395.379		0.467366	0.441501	682.236
0.487315	0.404411	530.371		0.47696	0.413257	565.618		0.502815	0.436941	571.681		0.477237	0.406179	504.588		0.512854	0.427422	460.7		0.516837	0.416937	402.771		0.476917	0.451052	692.914
0.497166	0.414263	542.634		0.486917	0.423214	578.48		0.512854	0.446979	584.466		0.486971	0.415913	516.018		0.52294	0.437508	469.982		0.527019	0.427119	410.181		0.486702	0.460837	703.645
0.507008	0.424105	555.037		0.497128	0.433425	591.534		0.522904	0.45703	597.434		0.4968	0.425743	527.575		0.532843	0.44741	479.37		0.536853	0.436953	417.642		0.496732	0.470867	714.424
0.516796	0.433893	567.59		0.507085	0.443382	604.77		0.532835	0.466961	610.474		0.506847	0.435789	539.317		0.542911	0.457478	488.897		0.546637	0.446737	425.176		0.506762	0.480897	725.218
0.526639	0.443735	580.306		0.516878	0.453175	618.18		0.542719	0.476845	623.52		0.516947	0.445889	551.231		0.553023	0.467591	498.542		0.556639	0.456739	432.773		0.516714	0.490849	736.005
0.536654	0.45375	593.111		0.526786	0.463083	631.753		0.552776	0.486902	636.672		0.526913	0.455855	563.322		0.562907	0.477475	508.238		0.566652	0.466752	440.388		0.526861	0.500996	746.714
0.546678	0.463775	605.953		0.536689	0.472986	645.439		0.56292	0.497045	649.957		0.536772	0.465714	575.57		0.572685	0.487253	517.963		0.576653	0.476753	448.01		0.537101	0.511236	757.303
0.556596	0.473692	618.831		0.5466	0.482897	659.183		0.572948	0.507073	663.337		0.546768	0.47571	587.92		0.582678	0.497246	527.803		0.586812	0.486912	455.686		0.547102	0.521237	767.791
0.56672	0.483816	631.774		0.556646	0.492943	672.962		0.582794	0.51692	676.849		0.556859	0.485801	600.303		0.5928	0.507368	537.771		0.596956	0.497056	463.441		0.557052	0.531187	778.187
0.577008	0.494105	644.769		0.566705	0.503002	686.834		0.592724	0.52685	690.467		0.566874	0.495816	612.732		0.602831	0.517399	547.812		0.606959	0.50706	471.272		0.566884	0.541018	788.481
0.587017	0.504113	657.848		0.576681	0.512978	700.838		0.602843	0.536968	704.096		0.576868	0.50581	625.259		0.612766	0.527333	557.953		0.616948	0.517049	479.174		0.576658	0.550793	798.701
0.596919	0.514015	671.027		0.586779	0.523076	714.995		0.612892	0.547017	717.715		0.586785	0.515727	637.91		0.622797	0.537364	568.195		0.626911	0.527012	487.15		0.586556	0.560691	808.868
0.606848	0.523945	684.269		0.596844	0.533141	729.297		0.622881	0.557006	731.422		0.596678	0.52562	650.703		0.63293	0.547498	578.481		0.6368	0.536901	495.15		0.596666	0.570801	818.902
0.616715	0.533811	697.524		0.606773	0.54307	743.646		0.632868	0.566994	745.237		0.606607	0.535549	663.635		0.642941	0.557509	588.78		0.646603	0.546704	503.16		0.60666	0.580795	828.805
0.626588	0.543685	710.739		0.616659	0.552956	757.985		0.642755	0.576881	759.189		0.616723	0.545665	676.595		0.65287	0.567438	599.17		0.656498	0.556598	511.237		0.616605	0.59074	838.58
0.636674	0.55377	723.942		0.62671	0.563007	772.388		0.652623	0.586749	773.282		0.626746	0.555688	689.526		0.662852	0.577419	609.645		0.666576	0.566676	519.424		0.626856	0.600991	848.286
0.646753	0.56385	737.167		0.636862	0.573159	786.901		0.6627	0.596826	787.432		0.636678	0.56562	702.486		0.672695	0.587263	620.2		0.676697	0.576797	527.686		0.637078	0.611213	857.912
0.656687	0.573783	750.443		0.646927	0.583224	801.485		0.672769	0.606895	801.562		0.646856	0.575798	715.509		0.682503	0.597071	630.874		0.686686	0.586786	536.022		0.646995	0.62113	867.465
0.666756	0.583853	763.844		0.656802	0.593099	816.205		0.68271	0.616836	815.687		0.656988	0.58593	728.625		0.69258	0.607148	641.658		0.696764	0.596864	544.395		0.656865	0.631	876.93
0.676845	0.593942	777.392		0.666735	0.603032	831.024		0.692817	0.626943	829.886		0.666806	0.595748	741.892		0.702738	0.617305	652.482		0.707	0.607101	552.792		0.666809	0.640944	886.29
0.686797	0.603894	790.946		0.676808	0.613105	845.846		0.70301	0.637136	844.195		0.67663	0.605572	755.262		0.712676	0.627243	663.304		0.717095	0.617195	561.229		0.676659	0.650794	895.508
0.69666	0.613756	804.425		0.686843	0.62314	860.654		0.712895	0.647021	858.654		0.686617	0.615559	768.682		0.722726	0.637293	674.186		0.72707	0.627171	569.728		0.686622	0.660757	904.577
0.7067	0.623796	817.944		0.696834	0.633131	875.514		0.72271	0.656835	873.262		0.696557	0.625499	782.145		0.733072	0.64764	685.18		0.736966	0.637067	578.286		0.696734	0.670869	913.539
0.716915	0.634012	831.54		0.706845	0.643142	890.402		0.732668	0.666794	887.971		0.706625	0.635567	795.658		0.74315	0.657718	696.281		0.746755	0.646856	586.94		0.706708	0.680843	922.4
0.72698	0.644077	845.193		0.716717	0.653014	905.296		0.742616	0.676742	902.729		0.716824	0.645766	809.27		0.752931	0.667499	707.48		0.756591	0.656691	595.696		0.716688	0.690823	931.211
0.736873	0.653969	858.937		0.726581	0.662878	920.2		0.752577	0.686703	917.547		0.726846	0.655788	823.009		0.762782	0.677349	718.782		0.766642	0.666742	604.502		0.726831	0.700966	939.997
0.746792	0.663889	872.802		0.736675	0.672972	935.036		0.762742	0.696868	932.454		0.7368	0.665742	836.879		0.772706	0.687274	730.169		0.776664	0.676764	613.335		0.736886	0.711021	948.722
0.756853	0.67395	886.666		0.746723	0.68302	949.737		0.772892	0.707017	947.488		0.746921	0.675863	850.905		0.782603	0.697171	741.588		0.78661	0.68671	622.194		0.746794	0.720928	957.278
0.766873	0.683969	900.449		0.756504	0.692801	964.335		0.782839	0.716965	962.654		0.756966	0.685908	865.07		0.792633	0.707201	753.058		0.796763	0.696864	631.138		0.756692	0.730827	965.66
0.776802	0.693898	914.245		0.766334	0.702631	979.02		0.792929	0.727055	977.989		0.766784	0.695726	879.257		0.802759	0.717327	764.633		0.807041	0.707142	640.163		0.766783	0.740918	973.964
0.78686	0.703957	928.124		0.776327	0.712624	993.871		0.803011	0.737137	993.503		0.776618	0.70556	893.514		0.812795	0.727362	776.336		0.817026	0.717127	649.27		0.776941	0.751075	982.181
0.796824	0.713921	942.104		0.786043	0.72234	1008.85		0.812902	0.747027	1009.11		0.786673	0.715615	907.96		0.822881	0.737449	788.176		0.826911	0.727012	658.469		0.786924	0.761059	990.286
0.80663	0.723727	956.173		0.795695	0.731992	1023.91		0.822688	0.756813	1024.74		0.79676	0.725702	922.584		0.832947	0.747514	800.147		0.836828	0.736928	667.732		0.796791	0.770925	998.326
0.816652	0.733749	969.81		0.805753	0.74205	1039.09		0.83265	0.766776	1040.51		0.806758	0.7357	937.339		0.84297	0.757538	812.21		0.846703	0.746803	677.021		0.80682	0.780955	1006.27
0.826826	0.743922	981.911		0.816083	0.75238	1054.36		0.842785	0.77691	1056.48		0.816707	0.745649	952.291		0.852856	0.767423	824.29		0.856602	0.756702	686.331		0.816898	0.791033	1014.03
0.836753	0.75385	992.052		0.826284	0.762581	1069.7		0.852847	0.786972	1072.6		0.826788	0.75573	967.406		0.862723	0.777291	836.432		0.866688	0.766789	695.691		0.826858	0.800993	1021.63
0.84669	0.763787	1000.31		0.836478	0.772775	1085.13		0.862764	0.79689	1088.9		0.836921	0.765863	982.622		0.872738	0.787305	848.653		0.876741	0.776841	705.126		0.836866	0.811001	1029.14
0.855337	0.772434	1006.83		0.846709	0.783006	1100.7		0.872781	0.806907	1105.39		0.846878	0.77582	997.984		0.882761	0.797328	860.914		0.886684	0.786784	714.658		0.846842	0.820977	1036.58
0.859421	0.776517	1011.59		0.856778	0.793075	1116.35		0.882904	0.81703	1122		0.856835	0.785777	1013.55		0.89262	0.807188	873.154		0.896786	0.796887	724.319		0.856717	0.830852	1043.97
0.860704	0.777801	1014.49		0.866869	0.803166	1132.02		0.892926	0.827052	1138.7		0.866747	0.795689	1029.3		0.902519	0.817087	885.425		0.906886	0.806987	734.112		0.866619	0.840754	1051.32
0.861627	0.778724	1015.56		0.876899	0.813196	1147.67		0.902848	0.836974	1155.55		0.876571	0.805513	1045.25		0.912522	0.82709	897.88		0.916818	0.816919	743.944		0.876779	0.850913	1058.57
0.862987	0.780083	1012.22		0.886831	0.823128	1163.29		0.912805	0.846931	1172.57		0.886467	0.81541	1061.46		0.922452	0.837019	910.546		0.926697	0.826797	753.774		0.886818	0.860953	1065.65
0.863295	0.780392	1008.29		0.896673	0.83297	1178.84		0.922667	0.856793	1189.78		0.896639	0.825581	1077.85		0.932139	0.846707	923.403		0.936731	0.836831	763.691		0.896671	0.870806	1072.56
0.863475	0.780572	1004.16		0.906592	0.842889	1194.43		0.93251	0.866636	1207.23		0.906695	0.835637	1094.35		0.941749	0.856316	936.409		0.946871	0.846971	773.701		0.906798	0.880933	1079.39
0.863579	0.780675	1000.23		0.916668	0.852965	1210.12		0.94259	0.876716	1224.9		0.916604	0.845546	1110.91		0.951733	0.866301	949.577		0.956935	0.857036	783.79		0.917021	0.891156	1086.2
0.863641	0.780737	996.423		0.926781	0.863078	1225.87		0.952702	0.886827	1242.68		0.926791	0.855733	1127.64		0.962111	0.876678	962.965		0.966817	0.866918	793.998		0.9269	0.901035	1092.99
0.863675	0.780772	992.689		0.936749	0.873046	1241.73		0.962628	0.896753	1260.48		0.93707	0.866012	1144.55		0.972532	0.8871	976.573		0.976794	0.876894	804.308		0.936673	0.910808	1099.72
0.863698	0.780794	989.061		0.946723	0.88302	1257.64		0.972683	0.906809	1278.31		0.947026	0.875968	1161.64		0.982755	0.897323	990.329		0.986898	0.886998	814.635		0.946615	0.92075	1106.38
0.863705	0.780802	985.557		0.956845	0.893142	1273.57		0.983009	0.917134	1296.19		0.956814	0.885756	1178.89		0.99266	0.907228	1004.28		0.996892	0.896993	824.98		0.956585	0.93072	1112.94
0.863715	0.780812	982.164		0.96692	0.903217	1289.5		0.993092	0.927217	1314.07		0.966736	0.895678	1196.3		1.00264	0.917203	1018.45		1.00685	0.906949	835.439		0.966631	0.940766	1119.35
0.86371	0.780806	978.887		0.97686	0.913157	1305.48		1.00291	0.937035	1331.97		0.976637	0.905579	1213.81		1.01291	0.927476	1032.7		1.01687	0.916973	846.028		0.976784	0.950918	1125.65
0.86371	0.780806	975.727		0.986748	0.923045	1321.48		1.01268	0.946807	1349.87		0.986566	0.915508	1231.38		1.02291	0.937482	1047		1.02674	0.926843	856.754		0.986895	0.96103	1131.9
0.863705	0.780802	972.669		0.996616	0.932913	1337.55		1.02244	0.956566	1367.75		0.996667	0.92561	1249.05		1.0327	0.947264	1061.43		1.03656	0.936664	867.638		0.996932	0.971067	1138.1
0.863703	0.7808	969.709		1.0065	0.942795	1353.7		1.03211	0.96624	1385.69		1.00675	0.935692	1266.88		1.04258	0.95715	1076.02		1.04668	0.946778	878.667		1.00699	0.981128	1144.23
0.863696	0.780793	966.83		1.01655	0.952847	1369.9		1.04198	0.976102	1403.72		1.01676	0.945704	1284.87		1.05263	0.967195	1090.73		1.05683	0.956928	889.764		1.01699	0.991125	1150.26
				1.02663	0.96293	1386.08		1.05195	0.986079	1421.83		1.02686	0.955803	1303.05		1.06262	0.977185	1105.49		1.06671	0.966809	900.896		1.02691	1.00104	1156.1
				1.03661	0.972908	1402.21		1.06177	0.995898	1439.99		1.03693	0.965874	1321.4		1.07273	0.987302	1120.31		1.07671	0.976806	912.155		1.03675	1.01089	1161.73
				1.04671	0.983009	1418.37		1.07196	1.00608	1458.3		1.04688	0.975827	1339.8		1.0829	0.99747	1135.31		1.08697	0.987067	923.617		1.04669	1.02083	1167.18
				1.05699	0.993285	1434.56		1.08246	1.01658	1476.79		1.05672	0.985657	1358.21		1.09294	1.00751	1150.48		1.09693	0.99703	935.286		1.05676	1.0309	1172.45
				1.06701	1.00331	1450.75		1.09272	1.02685	1495.35		1.06665	0.995593	1376.68		1.10293	1.0175	1165.82		1.1067	1.0068	947.096		1.0668	1.04094	1177.46
				1.07688	1.01318	1466.1		1.10261	1.03674	1513.86		1.07672	1.00566	1395.21		1.1129	1.02747	1181.33		1.11659	1.0167	959.05		1.07676	1.05089	1182.18
				1.08677	1.02306	1479.48		1.11257	1.0467	1532.43		1.08669	1.01563	1413.67		1.12283	1.0374	1196.97		1.1266	1.0267	971.126		1.0868	1.06093	1186.54
				1.09666	1.03296	1490.54		1.1227	1.05683	1551.06		1.09653	1.02547	1432.04		1.13267	1.04724	1212.63		1.13659	1.03669	983.301		1.09694	1.07107	1190.61
				1.10643	1.04273	1499.3		1.13273	1.06686	1569.56		1.10647	1.03542	1450.42		1.14252	1.05709	1228.4		1.14671	1.04681	995.586		1.10696	1.08109	1194.53
				1.1141	1.05039	1505.83		1.14259	1.07671	1587.93		1.11647	1.04541	1468.98		1.15253	1.0671	1244.36		1.15684	1.05694	1008.03		1.11687	1.09101	1198.45
				1.11737	1.05366	1510.18		1.15254	1.08667	1606.24		1.12629	1.05523	1487.72		1.16266	1.07723	1260.51		1.16684	1.06694	1020.62		1.12677	1.1009	1202.41
				1.11852	1.05482	1512.39		1.16267	1.09679	1624.48		1.1359	1.06484	1506.61		1.1727	1.08726	1276.83		1.17692	1.07702	1033.38		1.13661	1.11074	1206.5
				1.11939	1.05569	1512.46		1.17273	1.10685	1642.58		1.14559	1.07453	1525.61		1.18269	1.09726	1293.24		1.18698	1.08708	1046.26		1.14651	1.12064	1210.81
				1.12009	1.05639	1510.42		1.18276	1.11689	1660.63		1.1558	1.08474	1544.75		1.19288	1.10745	1309.71		1.19692	1.09702	1059.2		1.15664	1.13078	1215.31
				1.12052	1.05682	1506.28		1.19286	1.12699	1678.7		1.16619	1.09513	1564.08		1.20308	1.11764	1326.26		1.20676	1.10686	1072.18		1.1667	1.14083	1220.01
				1.12077	1.05706	1500.83		1.20283	1.13695	1696.79		1.17659	1.10554	1583.58		1.21307	1.12764	1342.91		1.21668	1.11678	1085.26		1.17664	1.15078	1224.96
				1.12091	1.05721	1495.29		1.21272	1.14685	1714.92		1.18669	1.11564	1603.2		1.22298	1.13755	1359.66		1.22675	1.12685	1098.49		1.18682	1.16095	1230.28
				1.12101	1.0573	1489.97		1.2228	1.15692	1733.11		1.19657	1.12551	1622.97		1.23279	1.14736	1376.55		1.23681	1.13691	1111.83		1.19709	1.17122	1235.88
				1.12106	1.05735	1484.81		1.2329	1.16703	1751.21		1.20668	1.13563	1642.89		1.24261	1.15718	1393.62		1.24676	1.14686	1125.28		1.20703	1.18117	1241.65
				1.12108	1.05738	1479.77		1.24276	1.17688	1769.16		1.21692	1.14586	1662.81		1.2526	1.16717	1410.85		1.25675	1.15685	1138.82		1.21686	1.191	1247.48
				1.1211	1.0574	1474.9		1.25271	1.18683	1787.08		1.22681	1.15575	1682.74		1.26267	1.17724	1428.11		1.26686	1.16696	1152.43		1.22677	1.20091	1253.31
				1.12111	1.05741	1470.19		1.26297	1.19709	1805.09		1.23657	1.16551	1702.74		1.27261	1.18718	1445.43		1.27695	1.17705	1166.09		1.23668	1.21082	1259.06
								1.27297	1.2071	1823.23		1.24653	1.17547	1722.8		1.28267	1.19723	1462.85		1.28689	1.18699	1179.86		1.24665	1.22078	1264.71
								1.28271	1.21684	1841.46		1.25656	1.1855	1742.88		1.29294	1.20751	1480.4		1.2968	1.1969	1193.74		1.25677	1.23091	1270.28
								1.29256	1.22668	1859.71		1.26661	1.19555	1762.88		1.303	1.21757	1498.08		1.30662	1.20672	1207.74		1.26682	1.24096	1275.79
								1.30262	1.23674	1877.95		1.27674	1.20569	1782.87		1.31292	1.22749	1515.91		1.31651	1.21661	1221.92		1.27679	1.25092	1281.26
								1.31262	1.24675	1896.07		1.28689	1.21583	1802.95		1.32284	1.23741	1533.88		1.32656	1.22666	1236.24		1.28692	1.26106	1286.72
								1.32275	1.25687	1914.08		1.29692	1.22586	1823.15		1.33273	1.2473	1551.91		1.33668	1.23678	1250.6		1.29705	1.27118	1292.15
								1.3329	1.26703	1932.1		1.30691	1.23585	1843.42		1.34257	1.25714	1569.95		1.34665	1.24675	1265		1.30699	1.28112	1297.44
								1.34295	1.27708	1949.96		1.31684	1.24578	1863.75		1.35262	1.26718	1588.03		1.35673	1.25683	1279.5		1.3168	1.29093	1302.56
								1.35294	1.28707	1966.41		1.32671	1.25566	1884.03		1.36273	1.2773	1606.2		1.36704	1.26714	1294.09		1.32677	1.30091	1307.64
								1.36287	1.297	1980.45		1.33654	1.26548	1904.19		1.37267	1.28724	1624.46		1.37709	1.27719	1308.78		1.33686	1.311	1312.7
								1.37281	1.30693	1991.87		1.34644	1.27538	1924.37		1.38269	1.29726	1642.87		1.38695	1.28705	1323.59		1.34682	1.32096	1317.7
								1.38224	1.31636	2000.73		1.35652	1.28546	1944.65		1.39283	1.3074	1661.46		1.39683	1.29693	1338.54		1.35665	1.33078	1322.67
								1.38837	1.32249	2007.1		1.36666	1.2956	1964.97		1.40285	1.31741	1680.13		1.40674	1.30684	1353.53		1.36659	1.34072	1327.61
								1.39068	1.3248	2011.04		1.37663	1.30557	1985.31		1.41274	1.32731	1698.72		1.41661	1.31671	1368.53		1.37669	1.35082	1332.46
								1.39169	1.32582	2012.56		1.38667	1.31561	2005.57		1.4227	1.33727	1717.33		1.42669	1.32679	1383.55		1.38676	1.36089	1337.19
								1.39318	1.32731	2008.41		1.39691	1.32585	2025.72		1.43282	1.34739	1736.04		1.4368	1.3369	1398.66		1.39682	1.37096	1341.81
								1.39357	1.32769	2002.99		1.40705	1.33599	2045.74		1.4429	1.35747	1754.8		1.44678	1.34688	1413.84		1.4069	1.38104	1346.31
								1.39379	1.32791	1996.6		1.41699	1.34593	2065.66		1.45282	1.36739	1773.63		1.45685	1.35695	1429.16		1.41682	1.39095	1350.78
								1.39392	1.32805	1990.25		1.42684	1.35578	2085.47		1.46277	1.37734	1792.56		1.46699	1.36709	1444.65		1.42673	1.40087	1355.26
								1.39401	1.32813	1984.11		1.43669	1.36563	2105.24		1.47285	1.38742	1811.49		1.47698	1.37708	1460.18		1.43689	1.41103	1359.68
								1.39405	1.32818	1978.11		1.44656	1.3755	2124.99		1.48289	1.39746	1830.34		1.48681	1.38691	1475.64		1.44694	1.42107	1363.96
								1.39408	1.32821	1972.24		1.45658	1.38552	2144.61		1.49281	1.40738	1849.2		1.49672	1.39682	1491.12		1.45678	1.43092	1368.12
								1.3941	1.32822	1966.55		1.4666	1.39555	2164.06		1.50285	1.41742	1868.15		1.50681	1.40691	1506.72		1.46682	1.44096	1372.25
								1.39411	1.32823	1961.03		1.47655	1.40549	2183.37		1.51279	1.42736	1887.17		1.51683	1.41693	1522.38		1.47704	1.45117	1376.42
								1.39411	1.32823	1955.68		1.4867	1.41564	2202.6		1.52258	1.43714	1906.24		1.52667	1.42677	1538.13		1.48689	1.46102	1380.65
								1.3941	1.32823	1950.49		1.49695	1.42589	2221.74		1.53256	1.44713	1925.42		1.53659	1.43669	1553.99		1.49667	1.4708	1384.95
												1.50693	1.43587	2240.82		1.5428	1.45737	1944.61		1.54669	1.44679	1569.9		1.50664	1.48078	1389.38
												1.51686	1.4458	2259.91		1.55278	1.46735	1963.66		1.55676	1.45686	1585.81		1.51667	1.4908	1393.79
												1.52682	1.45576	2278.99		1.56266	1.47723	1982.64		1.56675	1.46685	1601.76		1.52668	1.50081	1398.12
												1.53666	1.4656	2297.95		1.57285	1.48742	2001.69		1.57683	1.47693	1617.79		1.53681	1.51094	1402.42
												1.54651	1.47546	2316.75		1.58297	1.49754	2020.85		1.58677	1.48687	1633.91		1.54695	1.52109	1406.77
												1.5566	1.48554	2335.46		1.59279	1.50735	2040.05		1.59666	1.49676	1650.12		1.55698	1.53111	1411.13
												1.56669	1.49563	2354.09		1.60256	1.51713	2059.25		1.60678	1.50688	1666.45		1.567	1.54113	1415.52
												1.57663	1.50558	2372.64		1.61257	1.52714	2078.47		1.61694	1.51704	1682.76		1.57693	1.55106	1419.91
												1.58673	1.51568	2391.23		1.62257	1.53714	2097.66		1.62681	1.52691	1699		1.5868	1.56093	1424.26
												1.59685	1.52579	2409.87		1.63264	1.5472	2116.75		1.63672	1.53682	1715.24		1.59658	1.57071	1428.49
												1.6068	1.53574	2428.36		1.64279	1.55736	2135.8		1.64697	1.54707	1731.59		1.60647	1.5806	1432.71
												1.61665	1.5456	2446.55		1.65284	1.56741	2154.88		1.65699	1.55709	1748.05		1.61654	1.59068	1436.95
												1.62668	1.55562	2464.53		1.6629	1.57747	2173.98		1.66675	1.56685	1764.58		1.62668	1.60081	1441.16
												1.63682	1.56576	2482.34		1.67296	1.58753	2193.05		1.67659	1.57669	1781.22		1.63669	1.61083	1445.35
												1.64686	1.5758	2499.92		1.68294	1.59751	2212.06		1.68665	1.58675	1797.91		1.64675	1.62088	1449.47
												1.65678	1.58572	2517.4		1.69283	1.60739	2230.91		1.69666	1.59676	1814.59		1.65698	1.63112	1453.49
												1.66678	1.59572	2534.79		1.7027	1.61727	2249.67		1.70675	1.60685	1831.21		1.66712	1.64125	1457.39
												1.67687	1.60581	2551.94		1.71269	1.62726	2268.38		1.71689	1.61699	1847.91		1.67706	1.6512	1461.2
												1.68681	1.61575	2568.78		1.72272	1.63729	2287.06		1.72693	1.62703	1864.68		1.68697	1.66111	1464.92
												1.69675	1.62569	2585.41		1.73274	1.64731	2305.68		1.73694	1.63704	1881.51		1.69679	1.67092	1468.57
												1.7068	1.63574	2601.84		1.74272	1.65728	2324.24		1.74692	1.64702	1898.41		1.70661	1.68075	1472.14
												1.7167	1.64565	2618.01		1.75278	1.66735	2342.69		1.75686	1.65696	1915.36		1.71664	1.69078	1475.51
												1.72652	1.65546	2633.92		1.76295	1.67752	2361.02		1.76669	1.66679	1932.26		1.7267	1.70084	1478.3
												1.73663	1.66557	2649.61		1.77293	1.6875	2379.26		1.7765	1.6766	1949.19		1.73665	1.71078	1472.5
												1.74682	1.67577	2665.01		1.7828	1.69737	2397.44		1.78646	1.68656	1966.27		1.74673	1.72087	1451.2
												1.7567	1.68564	2680.02		1.79265	1.70722	2415.55		1.79654	1.69664	1983.47		1.75702	1.73115	1430.88
												1.76666	1.6956	2694.76		1.80255	1.71712	2433.64		1.80662	1.70672	2000.76		1.76702	1.74116	1411.66
												1.77693	1.70587	2709.38		1.81252	1.72708	2451.76		1.81663	1.71673	2018.08		1.77695	1.75108	1393.48
												1.78691	1.71585	2723.94		1.82262	1.73719	2469.75		1.82681	1.72691	2035.43		1.78689	1.76103	1376.31
												1.79666	1.7256	2738.37		1.83263	1.74719	2487.56		1.83706	1.73716	2052.77		1.79688	1.77102	1360.02
												1.80654	1.73548	2752.73		1.84265	1.75722	2505.27		1.84708	1.74718	2070.17		1.80672	1.78086	1344.58
												1.81653	1.74547	2767.08		1.85292	1.76749	2522.91		1.85697	1.75707	2087.6		1.81673	1.79087	1330.08
												1.82654	1.75548	2781.4		1.86307	1.77763	2540.47		1.86678	1.76688	2105.08		1.8268	1.80094	1316.85
												1.83666	1.7656	2795.65		1.87296	1.78752	2558		1.8766	1.7767	2122.66		1.83672	1.81086	1312.89
												1.8468	1.77574	2809.89		1.88282	1.79739	2575.47		1.88656	1.78666	2140.32		1.84675	1.82088	1325.16
												1.85686	1.7858	2824.1		1.89277	1.80734	2592.81		1.89668	1.79678	2157.94		1.85684	1.83098	1337.16
												1.86693	1.79587	2838.23		1.90263	1.81719	2609.96		1.90667	1.80677	2175.52		1.8668	1.84093	1348.68
												1.87694	1.80588	2852.21		1.91265	1.82722	2626.89		1.91667	1.81677	2193.14		1.87669	1.85083	1359.66
												1.88688	1.81582	2865.94		1.92281	1.83738	2643.67		1.92694	1.82704	2210.82		1.88672	1.86086	1370.2
												1.89677	1.82571	2879.24		1.9328	1.84736	2660.31		1.93703	1.83714	2228.52		1.89687	1.87101	1380.38
												1.90666	1.8356	2892.07		1.94279	1.85736	2676.84		1.94695	1.84705	2246.29		1.90691	1.88105	1390.19
												1.91666	1.8456	2904.47		1.95295	1.86752	2693.31		1.95686	1.85696	2264.14		1.91681	1.89094	1399.65
												1.92672	1.85566	2916.51		1.96302	1.87759	2709.64		1.96676	1.86686	2281.97		1.92677	1.90091	1408.76
												1.93671	1.86565	2928.15		1.97286	1.88743	2725.63		1.97657	1.87667	2299.75		1.93686	1.91099	1417.49
												1.94669	1.87564	2939.29		1.98272	1.89729	2741.35		1.98659	1.88669	2317.5		1.9469	1.92103	1425.81
												1.95682	1.88576	2949.78		1.99279	1.90735	2756.97		1.99671	1.89681	2335.27		1.95685	1.93099	1433.79
												1.96696	1.8959	2959.21		2.00284	1.91741	2772.44		2.00667	1.90677	2353.05		1.96687	1.941	1441.48
												1.97689	1.90583	2966.46		2.01272	1.92729	2787.76		2.01667	1.91678	2370.92		1.97676	1.9509	1448.91
												1.98675	1.91569	2969.36		2.02259	1.93715	2803		2.02684	1.92694	2389		1.9866	1.96073	1456.1
												1.99658	1.92552	2967.13		2.03266	1.94723	2818.12		2.03689	1.93699	2407.17		1.99665	1.97078	1463.07
												2.00649	1.93543	2960.66		2.04276	1.95733	2833.01		2.04671	1.94682	2425.19		2.00682	1.98095	1469.71
												2.01521	1.94415	2950.44		2.05274	1.96731	2847.71		2.05661	1.95671	2443.14		2.01675	1.99089	1475.99
												2.01971	1.94865	2936.75		2.06281	1.97738	2862.32		2.06675	1.96685	2461.15		2.02669	2.00082	1481.97
												2.02125	1.95019	2919.75		2.07283	1.9874	2876.84		2.0769	1.977	2479.18		2.03697	2.01111	1487.74
												2.02218	1.95113	2899.56		2.0827	1.99727	2891.24		2.08685	1.98695	2497.2		2.04703	2.02117	1493.33
												2.02295	1.95189	2876.41		2.09268	2.00725	2905.59		2.09675	1.99685	2515.31		2.05681	2.03095	1498.71
												2.02345	1.95239	2851.02		2.10291	2.01748	2919.79		2.10682	2.00692	2533.45		2.06661	2.04075	1503.86
												2.02373	1.95267	2824.83		2.1129	2.02747	2933.68		2.1169	2.017	2551.49		2.0766	2.05073	1508.77
												2.0239	1.95284	2800.25		2.12272	2.03729	2947.29		2.1268	2.0269	2569.44		2.08657	2.06071	1513.39
												2.024	1.95294	2778.33		2.13285	2.04742	2960.78		2.13681	2.03691	2587.44		2.09667	2.0708	1517.72
												2.02405	1.953	2758.4		2.14304	2.05761	2974.21		2.1468	2.0469	2605.51		2.10688	2.08101	1521.86
												2.02408	1.95302	2740.08		2.15286	2.06743	2987.56		2.15665	2.05675	2623.62		2.11692	2.09106	1525.87
												2.0241	1.95304	2723.09		2.16262	2.07719	3000.81		2.16657	2.06667	2641.85		2.12693	2.10107	1529.76
												2.0241	1.95304	2707.4		2.17263	2.0872	3013.98		2.17679	2.07689	2660.11		2.13697	2.11111	1533.51
												2.0241	1.95304	2693.07		2.18266	2.09722	3027.01		2.18681	2.08691	2678.29		2.14695	2.12109	1537.1
												2.0241	1.95305	2680.12		2.19271	2.10728	3039.78		2.19663	2.09673	2696.34		2.1568	2.13094	1540.46
												2.02409	1.95303	2668.22		2.20284	2.11741	3052.43		2.20679	2.10689	2714.44		2.16669	2.14083	1543.69
												2.02408	1.95302	2657.15		2.21294	2.1275	3065.02		2.21697	2.11707	2732.64		2.17672	2.15085	1546.85
												2.02408	1.95302	2646.81		2.22294	2.13751	3077.55		2.2268	2.1269	2750.89		2.18679	2.16093	1549.97
												2.02408	1.95302	2637.07		2.23292	2.14749	3090.02		2.23658	2.13668	2769.12		2.19681	2.17095	1553.04
																2.24289	2.15746	3102.42		2.24657	2.14667	2787.38		2.20677	2.1809	1556.08
																2.25279	2.16736	3114.66		2.25658	2.15668	2805.63		2.21686	2.19099	1559.05
																2.26257	2.17714	3126.75		2.26663	2.16673	2823.76		2.22698	2.20111	1561.99
																2.27246	2.18703	3138.83		2.27678	2.17688	2841.86		2.23691	2.21105	1564.94
																2.28251	2.19708	3150.98		2.28688	2.18698	2860		2.24682	2.22095	1567.91
																2.29263	2.2072	3163.15		2.29691	2.19701	2878.21		2.25667	2.2308	1570.91
																2.30261	2.21718	3175.29		2.30694	2.20704	2896.46		2.26654	2.24067	1573.98
																2.31269	2.22726	3187.38		2.31694	2.21704	2914.71		2.27656	2.25069	1577.12
																2.32298	2.23755	3199.45		2.32681	2.22691	2932.87		2.28667	2.26081	1580.24
																2.3331	2.24767	3211.5		2.33665	2.23675	2950.97		2.29667	2.27081	1583.31
																2.34302	2.25759	3223.56		2.34662	2.24672	2969.09		2.3067	2.28083	1586.4
																2.35285	2.26742	3235.56		2.35671	2.25681	2987.28		2.31697	2.29111	1589.53
																2.36268	2.27725	3247.61		2.36675	2.26685	3005.5		2.32709	2.30123	1592.7
																2.37258	2.28715	3259.71		2.37668	2.27678	3023.7		2.33698	2.31111	1595.91
																2.38266	2.29722	3271.73		2.38675	2.28685	3041.84		2.34681	2.32094	1599.16
																2.39271	2.30727	3283.63		2.39695	2.29705	3059.92		2.35675	2.33089	1602.42
																2.40268	2.31725	3295.48		2.40697	2.30707	3077.96		2.36665	2.34078	1605.63
																2.41285	2.32742	3307.34		2.41684	2.31694	3095.98		2.3767	2.35083	1608.79
																2.42303	2.3376	3319.17		2.42667	2.32677	3113.97		2.38684	2.36097	1611.93
																2.43297	2.34754	3330.99		2.43655	2.33665	3131.99		2.39683	2.37096	1615.09
																2.44289	2.35745	3342.82		2.44654	2.34664	3150.03		2.40687	2.38101	1618.28
																2.45283	2.3674	3354.64		2.45667	2.35677	3167.96		2.41699	2.39113	1621.51
																2.46265	2.37722	3366.36		2.46669	2.36679	3185.73		2.42698	2.40111	1624.69
																2.47258	2.38715	3377.96		2.47669	2.37679	3203.42		2.43679	2.41092	1627.71
																2.48273	2.39729	3389.52		2.48691	2.38701	3221.1		2.44672	2.42085	1630.67
																2.49274	2.40731	3401.02		2.49702	2.39712	3238.7		2.45682	2.43095	1633.62
																2.50264	2.41721	3412.52		2.50691	2.40701	3256.29		2.46687	2.44101	1636.59
																2.51278	2.42734	3424.15		2.51679	2.41689	3273.91		2.47674	2.45087	1639.57
																2.52291	2.43747	3435.87		2.52675	2.42685	3291.47		2.48659	2.46072	1642.58
																2.5328	2.44736	3447.44		2.53659	2.43669	3308.88		2.49664	2.47078	1645.56
																2.54263	2.4572	3458.82		2.54659	2.44669	3326.12		2.50672	2.48085	1648.44
																2.55271	2.46728	3470.15		2.55677	2.45687	3343.28		2.51671	2.49085	1651.27
																2.5629	2.47747	3481.45		2.56682	2.46692	3360.34		2.52685	2.50098	1654.12
																2.57291	2.48748	3492.64		2.5768	2.4769	3377.33		2.53686	2.51099	1656.98
																2.58281	2.49737	3503.81		2.58693	2.48703	3394.39		2.54674	2.52088	1659.84
																2.59282	2.50738	3514.97		2.59698	2.49708	3411.46		2.55674	2.53087	1662.71
																2.60291	2.51748	3525.99		2.60681	2.50691	3428.29		2.56692	2.54106	1665.5
																2.61285	2.52741	3536.77		2.61662	2.51672	3444.9		2.57687	2.55101	1668.16
																2.6228	2.53737	3547.52		2.62666	2.52676	3461.46		2.58675	2.56089	1670.72
																2.63283	2.5474	3558.27		2.63678	2.53688	3477.98		2.59695	2.57109	1673.29
																2.64271	2.55728	3569.02		2.64671	2.54681	3494.43		2.60708	2.58121	1675.9
																2.65256	2.56712	3579.84		2.65658	2.55668	3510.9		2.61685	2.59098	1678.53
																2.66273	2.57729	3590.74		2.66661	2.56671	3527.34		2.62664	2.60077	1681.15
																2.67287	2.58743	3601.51		2.67672	2.57682	3543.63		2.63665	2.61078	1683.75
																2.68272	2.59729	3612.09		2.6867	2.5868	3559.72		2.64665	2.62079	1686.27
																2.69273	2.60729	3622.63		2.69678	2.59688	3575.74		2.65674	2.63088	1688.66
																2.70298	2.61755	3633.22		2.70683	2.60693	3591.71		2.66694	2.64107	1691.02
																2.71291	2.62748	3643.87		2.71667	2.61677	3607.6		2.67702	2.65115	1693.38
																2.72267	2.63724	3654.47		2.72661	2.62671	3623.42		2.68699	2.66113	1695.72
																2.73257	2.64713	3665.04		2.73684	2.63694	3639.12		2.69695	2.67108	1698.05
																2.74255	2.65712	3675.55		2.74692	2.64702	3654.53		2.70686	2.68099	1700.34
																2.75258	2.66715	3685.9		2.75675	2.65685	3669.65		2.7167	2.69084	1702.52
																2.76272	2.67729	3696.04		2.76684	2.66694	3684.68		2.72654	2.70067	1704.59
																2.77289	2.68746	3706.16		2.77704	2.67714	3699.7		2.73652	2.71065	1706.67
																2.78295	2.69752	3716.28		2.78686	2.68697	3714.67		2.74666	2.72079	1708.77
																2.79299	2.70756	3726.37		2.79657	2.69667	3729.54		2.75676	2.73089	1710.87
																2.80297	2.71754	3736.38		2.80653	2.70664	3744.33		2.76673	2.74086	1712.96
																2.81287	2.72744	3746.26		2.81661	2.71671	3758.98		2.77685	2.75098	1715.01
																2.82274	2.73731	3755.97		2.82667	2.72677	3773.41		2.78707	2.76121	1717
																2.83264	2.74721	3765.61		2.8368	2.7369	3787.69		2.7971	2.77124	1718.96
																2.84265	2.75721	3775.28		2.84693	2.74703	3801.94		2.80703	2.78117	1720.92
																2.85274	2.76731	3784.98		2.85696	2.75706	3816.15		2.81688	2.79102	1722.89
																2.86273	2.7773	3794.72		2.86698	2.76708	3830.28		2.82671	2.80084	1724.92
																2.87273	2.7873	3804.43		2.87687	2.77698	3844.3		2.83662	2.81075	1727.01
																2.88287	2.79744	3814.09		2.88674	2.78684	3858.12		2.84671	2.82084	1729.08
																2.89298	2.80754	3823.73		2.89659	2.79669	3871.71		2.8567	2.83083	1731.12
																2.90293	2.8175	3833.41		2.90651	2.80661	3885.17		2.86666	2.8408	1733.16
																2.91277	2.82734	3843.07		2.9166	2.8167	3898.61		2.8769	2.85104	1735.22
																2.92262	2.83718	3852.77		2.92672	2.82683	3911.98		2.88709	2.86122	1737.32
																2.93256	2.84713	3862.55		2.9367	2.8368	3925.26		2.89701	2.87114	1739.48
																2.94265	2.85722	3872.31		2.94672	2.84683	3938.39		2.90689	2.88103	1741.67
																2.95272	2.86729	3881.9		2.95698	2.85708	3951.35		2.9168	2.89093	1743.86
																2.9627	2.87727	3891.35		2.96712	2.86722	3964.16		2.92662	2.90076	1746
																2.97283	2.8874	3900.82		2.97703	2.87713	3976.84		2.93661	2.91075	1748.09
																2.98305	2.89762	3910.25		2.98687	2.88697	3989.39		2.94674	2.92087	1750.18
																2.99299	2.90755	3919.68		2.9967	2.8968	4001.91		2.9567	2.93083	1752.25
																3.00284	2.91741	3929.17		3.00661	2.90671	4014.42		2.96667	2.94081	1754.36
																3.01277	2.92734	3938.68		3.01666	2.91676	4026.8		2.97682	2.95095	1756.56
																3.02267	2.93724	3948.1		3.02668	2.92678	4038.99		2.98686	2.96099	1758.78
																3.03259	2.94715	3957.37		3.03665	2.93675	4051.05		2.99675	2.97088	1760.9
																3.04273	2.95729	3966.56		3.0468	2.9469	4063.04		3.00667	2.98081	1762.95
																3.05286	2.96743	3975.21		3.05702	2.95712	4074.92		3.0168	2.99094	1765.01
																3.06281	2.97738	3981.88		3.067	2.9671	4086.72		3.02695	3.00108	1767.04
																3.0729	2.98747	3985.92		3.07692	2.97702	4098.49		3.03692	3.01105	1768.98
																3.08298	2.99755	3987.42		3.08685	2.98695	4110.15		3.04682	3.02095	1770.89
																3.09652	3.01109	3982.93		3.09665	2.99675	4121.6		3.05684	3.03098	1772.75
																3.09816	3.01273	3977.04		3.10657	3.00667	4132.87		3.0669	3.04104	1774.48
																3.09912	3.01369	3968.95		3.11675	3.01685	4144.01		3.07684	3.05097	1776.07
																3.09989	3.01446	3958.69		3.12678	3.02688	4155.05		3.08685	3.06098	1777.64
																3.10041	3.01498	3946.3		3.13664	3.03674	4166		3.09687	3.071	1779.17
																3.1007	3.01527	3932.42		3.14673	3.04683	4177.02		3.10671	3.08085	1780.67
																3.10089	3.01545	3918.54		3.15685	3.05695	4188.09		3.1166	3.09074	1782.19
																3.10099	3.01555	3905.35		3.16676	3.06686	4198.99		3.1268	3.10094	1783.72
																3.10105	3.01562	3892.79		3.1766	3.0767	4209.64		3.13685	3.11098	1785.2
																3.10108	3.01565	3880.8		3.18665	3.08675	4220.27		3.1467	3.12083	1786.63
																3.10111	3.01567	3869.35		3.19685	3.09695	4230.88		3.15683	3.13096	1788.09
																3.10112	3.01568	3858.42		3.20688	3.10698	4241.37		3.16706	3.1412	1789.64
																3.10112	3.01569	3847.95		3.21676	3.11686	4251.83		3.17693	3.15106	1791.27
																3.10112	3.01568	3837.92		3.22679	3.12689	4262.28		3.18666	3.16079	1792.92
																3.10112	3.01568	3828.32		3.23692	3.13702	4272.56		3.1966	3.17074	1794.61
																3.10111	3.01568	3819.1		3.24685	3.14695	4282.64		3.20659	3.18073	1796.31
																3.10111	3.01567	3810.24		3.25681	3.15691	4292.64		3.21663	3.19077	1797.96
																3.1011	3.01567	3801.69		3.26686	3.16696	4302.62		3.22679	3.20093	1799.59
																3.10109	3.01566	3793.44		3.27673	3.17683	4312.57		3.2369	3.21104	1801.26
																				3.28656	3.18666	4322.51		3.24691	3.22105	1802.97
																				3.2967	3.1968	4332.45		3.25698	3.23111	1804.7
																				3.30687	3.20697	4342.24		3.26701	3.24114	1806.44
																				3.31675	3.21685	4351.77		3.27694	3.25108	1808.1
																				3.32673	3.22683	4361.17		3.28677	3.2609	1809.68
																				3.337	3.2371	4370.55		3.29669	3.27083	1811.25
																				3.34698	3.24708	4379.92		3.30674	3.28088	1812.84
																				3.35672	3.25682	4389.17		3.31681	3.29094	1814.43
																				3.3666	3.2667	4398.32		3.32675	3.30088	1816.04
																				3.37659	3.27669	4407.36		3.33676	3.3109	1817.61
																				3.38658	3.28668	4416.19		3.34691	3.32105	1819.13
																				3.3967	3.2968	4424.82		3.35696	3.33109	1820.6
																				3.40687	3.30697	4433.37		3.36688	3.34102	1822.08
																				3.4169	3.317	4441.89		3.37679	3.35092	1823.54
																				3.42697	3.32707	4450.35		3.38666	3.36079	1825.03
																				3.43699	3.33709	4458.75		3.39657	3.3707	1826.56
																				3.44695	3.34705	4467		3.40669	3.38082	1828.06
																				3.45679	3.3569	4475.05		3.41673	3.39086	1829.45
																				3.46666	3.36676	4482.98		3.42669	3.40082	1830.76
																				3.4767	3.37681	4490.89		3.43685	3.41098	1832.04
																				3.48679	3.38689	4498.77		3.4471	3.42123	1833.3
																				3.49675	3.39685	4506.6		3.45707	3.43121	1834.54
																				3.50672	3.40682	4514.33		3.46691	3.44104	1835.81
																				3.51684	3.41694	4521.93		3.47682	3.45096	1837.04
																				3.52696	3.42706	4529.4		3.48667	3.4608	1838.2
																				3.53693	3.43703	4536.7		3.49659	3.47072	1839.27
																				3.5468	3.4469	4543.7		3.50673	3.48087	1840.3
																				3.55666	3.45676	4550.48		3.51683	3.49096	1841.31
																				3.56659	3.46669	4557.12		3.53693	3.51106	1843.32
																				3.57667	3.47677	4563.56		3.54705	3.52119	1844.37
																				3.58675	3.48685	4569.64		3.56676	3.5409	1846.13
																				3.59671	3.49681	4575.36		3.58683	3.56096	1847.68
																				3.60677	3.50687	4580.85		3.60661	3.58075	1849.11
																				3.617	3.5171	4586.05		3.61662	3.59076	1849.8
																				3.627	3.5271	4590.98		3.62676	3.60089	1850.43
																				3.63688	3.53698	4595.82		3.63677	3.61091	1850.95
																				3.64681	3.54691	4600.64		3.64681	3.62094	1851.41
																				3.65673	3.55683	4605.3		3.65687	3.631	1851.83
																				3.66662	3.56672	4609.74		3.67672	3.65085	1852.63
																				3.67672	3.57682	4614.04		3.68688	3.66101	1852.98
																				3.68687	3.58697	4618.25		3.69694	3.67107	1853.2
																				3.69681	3.59691	4622.36		3.7168	3.69093	1853.24
																				3.70683	3.60693	4626.47		3.72705	3.70119	1853.23
																				3.71697	3.61707	4630.68		3.74673	3.72086	1853.2
																				3.72701	3.62711	4634.88		3.76669	3.74083	1852.95
																				3.73683	3.63693	4638.92		3.77671	3.75084	1852.59
																				3.74671	3.64681	4642.97		3.78683	3.76096	1852.09
																				3.75678	3.65689	4647.17		3.79699	3.77112	1851.54
																				3.76679	3.66689	4651.47		3.81694	3.79107	1850.26
																				3.77666	3.67676	4655.86		3.83682	3.81095	1848.55
																				3.78664	3.68674	4660.43		3.84667	3.82081	1847.44
																				3.79673	3.69683	4665.1		3.85655	3.83068	1846.24
																				3.80678	3.70688	4669.73		3.86658	3.84072	1845.02
																				3.81679	3.71689	4674.36		3.87671	3.85085	1843.75
																				3.82691	3.72701	4679.06		3.88674	3.86087	1842.4
																				3.83685	3.73695	4683.82		3.89679	3.87092	1840.93
																				3.84669	3.74679	4688.65		3.90702	3.88115	1839.34
																				3.85677	3.75687	4693.58		3.91716	3.8913	1837.66
																				3.86697	3.76707	4698.48		3.92709	3.90122	1835.93
																				3.87687	3.77697	4703.25		3.93694	3.91108	1834.16
																				3.88678	3.78688	4708		3.94677	3.92091	1832.41
																				3.89703	3.79713	4712.93		3.95665	3.93078	1830.7
																				3.90706	3.80716	4718.09		3.96668	3.94081	1829.01
																				3.91678	3.81688	4723.46		3.97672	3.95086	1827.32
																				3.9266	3.8267	4729.04		3.98669	3.96082	1825.64
																				3.93665	3.83675	4734.8		3.99678	3.97092	1824.06
																				3.9467	3.8468	4740.61		4.00706	3.98119	1822.54
																				3.95676	3.85686	4746.44		4.01706	3.9912	1821.1
																				3.9669	3.867	4752.4		4.02697	4.0011	1819.71
																				3.97696	3.87706	4758.57		4.03689	4.01102	1818.34
																				3.98699	3.88709	4764.91		4.04673	4.02086	1816.92
																				3.99692	3.89702	4771.37		4.05657	4.0307	1815.44
																				4.00683	3.90693	4777.87		4.06666	4.04079	1813.91
																				4.01668	3.91678	4784.34		4.07674	4.05087	1812.36
																				4.02653	3.92663	4790.82		4.08664	4.06078	1810.77
																				4.03656	3.93666	4797.42		4.09671	4.07085	1809.2
																				4.04667	3.94677	4804.13		4.10687	4.08101	1807.67
																				4.0567	3.9568	4810.91		4.11688	4.09101	1806.08
																				4.06669	3.96679	4817.71		4.12674	4.10088	1804.42
																				4.0769	3.977	4824.49		4.13678	4.11091	1802.8
																				4.08711	3.98722	4831.23		4.14691	4.12105	1801.26
																				4.09706	3.99716	4837.95		4.15696	4.13109	1799.77
																				4.10692	4.00702	4844.65		4.16684	4.14098	1798.38
																				4.11677	4.01687	4851.37		4.17682	4.15095	1797.13
																				4.12666	4.02676	4858.16		4.18689	4.16103	1795.94
																				4.13665	4.03675	4864.95		4.19687	4.171	1794.77
																				4.14671	4.04681	4871.62		4.2068	4.18094	1793.69
																				4.1567	4.0568	4878.18		4.21688	4.19102	1792.74
																				4.16674	4.06684	4884.71		4.23662	4.21075	1791.07
																				4.177	4.0771	4891.19		4.24666	4.22079	1790.36
																				4.18702	4.08712	4897.63		4.25686	4.23099	1789.62
																				4.19694	4.09704	4904.09		4.27672	4.25085	1787.92
																				4.20688	4.10698	4910.55		4.28697	4.26111	1787.12
																				4.21676	4.11686	4916.91		4.29702	4.27116	1786.39
																				4.22658	4.12668	4923.13		4.31658	4.29071	1785.12
																				4.23664	4.13674	4929.29		4.32658	4.30071	1784.56
																				4.24677	4.14687	4935.47		4.33658	4.31072	1784.01
																				4.25668	4.15678	4941.63		4.34669	4.32083	1783.48
																				4.26668	4.16678	4947.87		4.35691	4.33105	1783.04
																				4.27684	4.17694	4954.29		4.36695	4.34109	1782.73
																				4.28689	4.18699	4960.74		4.37698	4.35112	1782.53
																				4.29672	4.19682	4967.01		4.38701	4.36115	1782.41
																				4.30666	4.20676	4973.2		4.40685	4.38099	1782.21
																				4.31683	4.21693	4979.43		4.42672	4.40085	1782.09
																				4.32696	4.22706	4984.86		4.43677	4.4109	1782.11
																				4.33688	4.23698	4988.07		4.44678	4.42091	1782.17
																				4.35683	4.25693	4986.86		4.46686	4.44099	1782.28
																				4.36523	4.26533	4982.62		4.47702	4.45115	1782.3
																				4.36917	4.26927	4975.98		4.49684	4.47098	1782.41
																				4.37056	4.27066	4967.11		4.51656	4.49069	1782.54
																				4.37142	4.27152	4956.18		4.52662	4.50075	1782.6
																				4.37212	4.27222	4943.21		4.53677	4.51091	1782.53
																				4.37256	4.27266	4928.26		4.55673	4.53087	1782.11
																				4.37282	4.27292	4912.17		4.567	4.54113	1781.83
																				4.37297	4.27307	4896.38		4.57705	4.55118	1781.47
																				4.37307	4.27317	4881.35		4.5968	4.57093	1780.46
																				4.37312	4.27322	4867.05		4.61665	4.59078	1778.71
																				4.37315	4.27325	4853.38		4.62669	4.60082	1777.5
																				4.37317	4.27327	4840.32		4.63684	4.61098	1776.09
																				4.37317	4.27327	4827.83		4.64682	4.62095	1774.42
																				4.37317	4.27327	4815.88		4.65684	4.63097	1772.3
																				4.37317	4.27327	4804.42		4.66699	4.64112	1769.42
																				4.37316	4.27326	4793.42		4.67701	4.65114	1765.5
																				4.37316	4.27326	4782.84		4.68681	4.66094	1760.52
																				4.37315	4.27325	4772.65		4.69668	4.67082	1754.64
																				4.37314	4.27324	4762.84		4.70677	4.68091	1748.13
																				4.37314	4.27324	4753.36		4.71684	4.69098	1741.16
																								4.72673	4.70087	1733.92
																								4.73665	4.71079	1726.59
																								4.74673	4.72086	1719.27
																								4.7568	4.73093	1706.71
																								4.76678	4.74091	1633.57
																								4.7769	4.75104	1556.7
																								4.7869	4.76104	1481.93

## Sheet: ESIN 8
ESIN 8 (1000 N)				ESIN 8 (1500 N)				ESIN 8 (2000 N)				ESIN 8 (3000 N)				ESIN 8 (4000 N)				ESIN 8 (5000 N)
Standard travel	Displacement corrected	Standard force		Standard travel	Displacement corrected	Standard force		Standard travel	Displacement corrected	Standard force		Standard travel	Displacement corrected	Standard force		Standard travel	Displacement corrected	Standard force		Standard travel	Displacement corrected	Standard force
mm	mm	N		mm	mm	N		mm	mm	N		mm	mm	N		mm	mm	N		mm	mm	N
0	-0.0384314	117.103		0	-0.0321105	124.64		0	-0.0383911	119.827		0	-0.0502893	114.11		0	-0.0772708	107.374		0	-0.091084	105.516
-8.96931e-06	-0.0384404	115.964		-6.50167e-06	-0.032117	123.487		-5.97596e-06	-0.0383971	118.811		-6.26564e-06	-0.0502956	112.914		2.44617e-06	-0.0772683	106.234		6.90937e-06	-0.0910771	104.399
-1.36793e-05	-0.0384451	114.894		-9.7096e-06	-0.0321202	122.413		-1.01709e-05	-0.0384013	117.566		-9.52721e-06	-0.0502989	111.821		-2.95043e-06	-0.0772737	105.223		1.6737e-06	-0.0910824	103.383
-1.45483e-05	-0.0384459	113.57		-1.11258e-05	-0.0321216	121.408		-1.69086e-05	-0.0384081	116.407		-1.69516e-05	-0.0503063	110.594		-3.22938e-06	-0.077274	104.188		-3.06845e-06	-0.0910871	102.365
-2.17366e-05	-0.0384531	112.319		-1.78313e-05	-0.0321283	120.165		-1.56534e-05	-0.0384068	115.312		-1.50526e-05	-0.0503044	109.457		-1.02997e-06	-0.0772718	103.096		9.65595e-08	-0.0910839	101.272
-2.13718e-05	-0.0384528	111.152		-1.91188e-05	-0.0321296	119.01		-1.5192e-05	-0.0384063	114.296		-1.81961e-05	-0.0503075	108.406		0.000370724	-0.0769	102.241		0.0016003	-0.0894837	100.946
-2.69079e-05	-0.0384583	110.058		-2.41292e-05	-0.0321346	117.933		-1.62649e-05	-0.0384074	113.129		-2.06208e-05	-0.05031	107.237		0.00345335	-0.0738174	103.468		0.00382646	-0.0872576	101.995
-2.54273e-05	-0.0384568	109.038		-2.50733e-05	-0.0321355	116.693		-1.59109e-05	-0.0384071	112.048		0.000191821	-0.0500975	106.193		0.00534151	-0.0719292	104.679		0.00579364	-0.0852904	103.179
-2.33138e-05	-0.0384547	107.823		-2.72298e-05	-0.0321377	115.532		0.00221613	-0.036175	111.81		0.0029656	-0.0473237	107.403		0.00759311	-0.0696777	106.317		0.00813438	-0.0829497	104.745
0.00291133	-0.0355201	108.901		0.00343683	-0.0286736	116.816		0.00375818	-0.034633	113.041		0.00470129	-0.0455881	108.836		0.0102438	-0.067027	108.309		0.0108776	-0.0802064	106.602
0.00471571	-0.0337157	110.853		0.0053051	-0.0268054	118.803		0.00570695	-0.0326842	114.91		0.0068395	-0.0434498	110.845		0.0117034	-0.0655674	109.411		0.0123879	-0.0786961	107.614
0.0057586	-0.0326728	112.119		0.00638555	-0.0257249	120.067		0.00682426	-0.0315669	116.084		0.0080727	-0.0422166	112.05		0.013271	-0.0639997	110.579		0.0140025	-0.0770815	108.679
0.00691429	-0.0315171	113.564		0.00756022	-0.0245502	121.506		0.00804659	-0.0303445	117.41		0.00938106	-0.0409083	113.366		0.0149518	-0.062319	111.795		0.0157205	-0.0753635	109.789
0.00815488	-0.0302765	115.153		0.00883465	-0.0232758	123.097		0.00936887	-0.0290223	118.871		0.0107982	-0.0394912	114.777		0.016734	-0.0605367	113.062		0.0175589	-0.0735251	110.936
0.00948834	-0.0289431	116.866		0.0102139	-0.0218965	124.83		0.0107974	-0.0275938	120.458		0.0123197	-0.0379697	116.268		0.0186128	-0.058658	114.37		0.0194921	-0.0715919	112.126
0.0109114	-0.02752	118.695		0.0116973	-0.0204132	126.688		0.0123227	-0.0260684	122.15		0.0139298	-0.0363595	117.833		0.0206208	-0.0566499	115.722		0.0215256	-0.0695584	113.352
0.0124404	-0.0259909	120.632		0.0132827	-0.0188278	128.663		0.0139571	-0.0244341	123.938		0.0156559	-0.0346334	119.472		0.0227163	-0.0545545	117.116		0.0236523	-0.0674318	114.613
0.0140585	-0.0243728	122.666		0.0149823	-0.0171282	130.751		0.015706	-0.0226851	125.821		0.0174985	-0.0327909	121.177		0.024902	-0.0523688	118.55		0.0258763	-0.0652077	115.907
0.0157691	-0.0226623	124.804		0.0167904	-0.0153201	132.95		0.0175391	-0.020852	127.789		0.0194282	-0.0308611	122.942		0.0271884	-0.0500824	120.026		0.0281998	-0.0628843	117.235
0.0175847	-0.0208467	127.043		0.0186844	-0.0134261	135.257		0.0194744	-0.0189168	129.844		0.0214548	-0.0288345	124.782		0.0295533	-0.0477175	121.54		0.0305931	-0.0604909	118.602
0.0194904	-0.0189409	129.381		0.0206712	-0.0114392	137.677		0.0214992	-0.016892	131.987		0.0235667	-0.0267227	126.696		0.0320306	-0.0452401	123.092		0.0330898	-0.0579942	120.007
0.0215063	-0.0169251	131.812		0.0227613	-0.00934921	140.214		0.0236022	-0.0147889	134.213		0.0257725	-0.0245169	128.694		0.0345959	-0.0426749	124.688		0.0356853	-0.0553988	121.444
0.0236306	-0.0148007	134.329		0.0249417	-0.00716873	142.863		0.0257988	-0.0125923	136.525		0.0280767	-0.0222126	130.768		0.0372682	-0.0400025	126.33		0.0384113	-0.0526727	122.92
0.0258529	-0.0125785	136.93		0.0272159	-0.00489452	145.628		0.0280978	-0.0102934	138.919		0.0305049	-0.0197845	132.915		0.0400667	-0.0372041	128.018		0.0412367	-0.0498473	124.437
0.0281882	-0.0102431	139.589		0.0295936	-0.0025169	148.496		0.030508	-0.00788316	141.386		0.0330635	-0.0172259	135.135		0.0429909	-0.0342799	129.756		0.0441755	-0.0469085	125.995
0.0306145	-0.00781685	142.296		0.0321105	0	151.463		0.0330337	-0.00535744	143.938		0.0357372	-0.0145522	137.441		0.0459992	-0.0312716	131.536		0.0471854	-0.0438986	127.59
0.0331349	-0.00529644	145.051		0.0347459	0.00263541	154.528		0.0356533	-0.00273789	146.58		0.0385035	-0.0117858	139.824		0.0491073	-0.0281635	133.362		0.0502919	-0.0407922	129.225
0.0357439	-0.0026875	147.873		0.0374612	0.00535077	157.701		0.0383911	0	149.33		0.0413115	-0.00897786	142.294		0.0522829	-0.0249878	135.233		0.0535036	-0.0375804	130.893
0.0384314	0	150.757		0.0402549	0.0081444	160.988		0.0412012	0.00281002	152.198		0.0442043	-0.00608502	144.868		0.0555209	-0.0217499	137.142		0.05683	-0.034254	132.595
0.0412135	0.00278214	153.704		0.0431133	0.0110029	164.404		0.0440963	0.00570513	155.188		0.0471972	-0.00309211	147.536		0.0588727	-0.0183981	139.092		0.0602753	-0.0308087	134.323
0.0441166	0.00568521	156.718		0.0460516	0.0139411	167.951		0.0471123	0.00872114	158.288		0.0502893	0	150.305		0.0623761	-0.0148947	141.089		0.0638203	-0.0272638	136.087
0.047151	0.00871957	159.795		0.0490968	0.0169863	171.61		0.050269	0.0118778	161.482		0.0534977	0.00320835	153.173		0.065976	-0.0112948	143.123		0.0674212	-0.0236628	137.89
0.0502737	0.0118423	162.938		0.0522573	0.0201468	175.371		0.0535512	0.01516	164.768		0.0568128	0.00652343	156.134		0.0696121	-0.00765868	145.205		0.0710662	-0.0200178	139.738
0.0534873	0.0150559	166.145		0.0555416	0.0234311	179.238		0.0569527	0.0185616	168.163		0.060236	0.00994665	159.214		0.0733625	-0.00390822	147.325		0.0748262	-0.0162579	141.626
0.0567915	0.0183601	169.423		0.0589425	0.026832	183.236		0.06041	0.0220189	171.672		0.0637614	0.0134721	162.419		0.0772708	0	149.486		0.0787339	-0.0123502	143.553
0.0601856	0.0217542	172.763		0.0624067	0.0302963	187.38		0.063901	0.0255099	175.284		0.0673751	0.0170857	165.74		0.0813422	0.00407147	151.694		0.082762	-0.00832201	145.534
0.0637133	0.0252819	176.158		0.0659315	0.033821	191.672		0.0674662	0.0290751	178.994		0.0710715	0.0207822	169.188		0.0855072	0.00823642	153.949		0.0868819	-0.00420214	147.561
0.0673663	0.0289349	179.599		0.0695489	0.0374384	196.104		0.071185	0.0327939	182.791		0.0748776	0.0245883	172.76		0.0896562	0.0123855	156.253		0.091084	0	149.644
0.0711133	0.0326819	183.082		0.0733119	0.0412014	200.687		0.0750254	0.0366343	186.696		0.0788248	0.0285355	176.462		0.0938792	0.0166084	158.61		0.0954277	0.00434363	151.79
0.0749054	0.036474	186.608		0.077196	0.0450856	205.428		0.0789476	0.0405565	190.721		0.0828465	0.0325571	180.284		0.0982486	0.0209779	161.024		0.0999508	0.00886678	154.013
0.0787787	0.0403473	190.167		0.0811421	0.0490316	210.33		0.0828875	0.0444964	194.856		0.086954	0.0366646	184.211		0.102719	0.0254484	163.491		0.104534	0.0134498	156.296
0.0827742	0.0443428	193.756		0.0851786	0.0530681	215.386		0.0869217	0.0485306	199.103		0.091173	0.0408836	188.252		0.107255	0.0299845	166.014		0.109125	0.0180407	158.638
0.0868933	0.0484619	197.387		0.0893361	0.0572256	220.602		0.0911223	0.0527312	203.489		0.0955255	0.0452362	192.429		0.111844	0.0345733	168.582		0.113809	0.0227254	161.027
0.0911049	0.0526736	201.067		0.0936795	0.061569	225.992		0.0954905	0.0570993	208.028		0.0999832	0.0496939	196.727		0.116586	0.0393148	171.223		0.118659	0.0275753	163.499
0.095403	0.0569716	204.793		0.0981449	0.0660345	231.551		0.0999082	0.0615171	212.731		0.104483	0.0541936	201.15		0.121471	0.0442002	173.959		0.123623	0.0325393	166.057
0.0998096	0.0613782	208.57		0.102615	0.070505	237.277		0.104353	0.0659621	217.589		0.109042	0.058753	205.706		0.126441	0.0491702	176.781		0.128592	0.0375082	168.69
0.104388	0.0659569	212.415		0.107126	0.0750157	243.209		0.108935	0.0705436	222.605		0.11376	0.0634709	210.419		0.131521	0.0542498	179.721		0.133627	0.0425434	171.422
0.109103	0.070672	216.336		0.111785	0.0796747	249.361		0.1137	0.075309	227.777		0.118594	0.068305	215.274		0.136754	0.0594829	182.811		0.138846	0.0477622	174.257
0.113853	0.0754219	220.3		0.116566	0.0844551	255.7		0.118566	0.0801749	233.084		0.123517	0.0732279	220.263		0.142106	0.0648349	186.073		0.144206	0.0531219	177.174
0.118628	0.0801964	224.293		0.121421	0.0893106	262.174		0.123468	0.0850771	238.523		0.128558	0.0782688	225.406		0.147485	0.0702145	189.517		0.149626	0.0585416	180.165
0.123523	0.085092	228.335		0.126435	0.0943249	268.784		0.128456	0.0900646	244.15		0.133758	0.0834684	230.737		0.152899	0.0756287	193.157		0.155193	0.0641085	183.263
0.128588	0.0901568	232.436		0.131662	0.0995511	275.57		0.133593	0.0952021	249.967		0.139037	0.0887472	236.236		0.158496	0.0812248	197.012		0.160914	0.0698299	186.485
0.133709	0.0952772	236.584		0.136962	0.104851	282.543		0.138797	0.100406	255.937		0.14429	0.0940004	241.881		0.164244	0.0869732	201.089		0.166605	0.0755214	189.854
0.138864	0.100433	240.802		0.142241	0.110131	289.671		0.144112	0.105721	262.052		0.149657	0.0993673	247.687		0.170048	0.0927776	205.385		0.172346	0.0812621	193.346
0.144155	0.105723	245.11		0.147543	0.115433	296.979		0.149632	0.111241	268.326		0.155174	0.104885	253.641		0.175948	0.0986775	209.899		0.178243	0.0871588	196.932
0.149579	0.111147	249.48		0.153021	0.12091	304.452		0.155211	0.11682	274.786		0.160755	0.110465	259.753		0.181962	0.104691	214.611		0.184224	0.0931401	200.614
0.155082	0.11665	253.892		0.158569	0.126459	312.04		0.160769	0.122378	281.436		0.166408	0.116118	266.048		0.187973	0.110702	219.495		0.19037	0.0992856	204.409
0.160735	0.122304	258.359		0.164138	0.132028	319.772		0.166456	0.128065	288.31		0.172214	0.121925	272.561		0.194077	0.116807	224.538		0.196716	0.105632	208.327
0.166594	0.128163	262.923		0.169892	0.137782	327.715		0.172284	0.133893	295.424		0.178123	0.127834	279.28		0.200352	0.123081	229.73		0.203018	0.111934	212.403
0.172432	0.134001	267.627		0.175782	0.143672	335.91		0.178202	0.139811	302.758		0.1841	0.133811	286.201		0.206692	0.129422	235.083		0.209322	0.118238	216.63
0.178244	0.139813	272.449		0.181665	0.149554	344.335		0.184182	0.145791	310.293		0.190248	0.139959	293.341		0.213066	0.135795	240.587		0.215773	0.124689	220.999
0.184217	0.145786	277.327		0.187706	0.155595	352.972		0.190282	0.151891	318.038		0.196576	0.146287	300.757		0.219592	0.142321	246.207		0.222359	0.131275	225.53
0.190297	0.151866	282.25		0.193953	0.161842	361.838		0.196521	0.15813	326.005		0.202883	0.152593	308.472		0.226239	0.148969	251.949		0.229077	0.137993	230.24
0.196553	0.158122	287.228		0.200249	0.168138	370.979		0.202865	0.164474	334.21		0.209248	0.158958	316.431		0.23307	0.155799	257.845		0.235909	0.144825	235.131
0.203019	0.164588	292.259		0.20661	0.174499	380.376		0.209344	0.170953	342.642		0.215734	0.165445	324.619		0.240066	0.162795	263.927		0.242778	0.151694	240.213
0.209451	0.171019	297.385		0.213088	0.180978	390.001		0.215883	0.177492	351.33		0.222361	0.172072	333.065		0.247061	0.16979	270.211		0.249829	0.158745	245.491
0.215829	0.177397	302.628		0.219653	0.187543	399.876		0.222414	0.184023	360.293		0.229248	0.178958	341.743		0.254108	0.176837	276.663		0.257086	0.166002	250.954
0.222385	0.183954	307.962		0.226411	0.1943	409.997		0.229095	0.190704	369.495		0.236121	0.185832	350.647		0.261268	0.183997	283.276		0.264386	0.173302	256.608
0.22905	0.190619	313.416		0.233286	0.201175	420.344		0.235919	0.197528	378.947		0.242909	0.19262	359.8		0.268682	0.191411	290.064		0.271698	0.180614	262.426
0.235816	0.197384	318.992		0.240155	0.208044	430.95		0.242896	0.204505	388.683		0.249873	0.199584	369.221		0.276309	0.199039	297.028		0.27905	0.187966	268.414
0.242764	0.204332	324.681		0.247078	0.214967	441.841		0.250052	0.211661	398.666		0.256966	0.206676	378.939		0.2838	0.206529	304.162		0.286583	0.195499	274.572
0.249756	0.211325	330.506		0.25411	0.221999	453.018		0.257163	0.218772	408.911		0.264145	0.213856	388.949		0.291257	0.213986	311.494		0.294309	0.203225	280.91
0.256887	0.218455	336.497		0.26125	0.229139	464.451		0.264305	0.225914	419.414		0.271428	0.221139	399.202		0.298794	0.221523	319.076		0.302016	0.210932	287.418
0.264224	0.225793	342.652		0.268548	0.236437	476.086		0.271597	0.233206	430.214		0.278797	0.228508	409.705		0.306493	0.229222	326.889		0.309703	0.218619	294.099
0.271652	0.23322	348.989		0.275956	0.243845	487.936		0.278954	0.240563	441.341		0.286355	0.236065	420.524		0.314362	0.237091	334.862		0.317429	0.226345	300.968
0.279099	0.240668	355.483		0.283491	0.251381	500.062		0.286435	0.248044	452.726		0.294139	0.243849	431.683		0.322229	0.244958	343.016		0.325323	0.234239	308.032
0.286565	0.248134	362.139		0.291136	0.259025	512.474		0.294004	0.255613	464.381		0.301944	0.251655	443.156		0.330293	0.253023	351.415		0.333472	0.242388	315.287
0.294211	0.255779	368.959		0.298749	0.266639	525.188		0.301702	0.263311	476.387		0.30968	0.259391	454.92		0.338546	0.261276	360.076		0.341775	0.250691	322.752
0.301998	0.263567	375.953		0.306455	0.274345	538.201		0.309622	0.271231	488.774		0.317522	0.267233	466.964		0.346873	0.269603	368.957		0.350155	0.259071	330.453
0.309761	0.27133	383.128		0.314331	0.28222	551.488		0.317541	0.27915	501.439		0.325686	0.275397	479.314		0.355238	0.277968	378.063		0.358579	0.267495	338.381
0.31756	0.279128	390.484		0.322406	0.290295	564.987		0.325495	0.287104	514.375		0.333891	0.283602	491.971		0.363779	0.286509	387.409		0.367121	0.276037	346.545
0.325419	0.286987	398.058		0.330572	0.298462	578.699		0.333582	0.29519	527.636		0.342074	0.291785	504.897		0.372462	0.295191	397.033		0.375857	0.284773	354.911
0.333401	0.294969	405.809		0.33872	0.306609	592.664		0.342018	0.303627	541.281		0.350229	0.299939	518.143		0.381169	0.303898	406.875		0.384742	0.293658	363.443
0.341627	0.303196	413.761		0.346973	0.314862	607.018		0.350424	0.312033	555.248		0.358481	0.308192	531.736		0.389943	0.312672	416.912		0.393601	0.302517	372.154
0.350012	0.311581	421.926		0.355272	0.323162	621.724		0.358697	0.320306	569.497		0.367016	0.316726	545.675		0.398741	0.32147	427.147		0.402455	0.311371	381.109
0.358535	0.320104	430.314		0.363638	0.331528	636.755		0.367091	0.3287	584.168		0.375718	0.325429	559.931		0.40767	0.330399	437.598		0.411442	0.320358	390.326
0.367072	0.328641	438.877		0.372127	0.340016	652.16		0.375664	0.337273	599.255		0.38451	0.33422	574.529		0.416758	0.339487	448.3		0.420432	0.329348	399.76
0.375687	0.337256	447.512		0.38086	0.34875	667.948		0.384394	0.346002	614.613		0.393311	0.343022	589.494		0.425938	0.348667	459.274		0.429453	0.338369	409.416
0.384565	0.346133	456.24		0.38975	0.357639	683.998		0.393125	0.354734	630.204		0.4022	0.35191	604.867		0.435129	0.357858	470.559		0.438708	0.347624	419.359
0.39356	0.355129	465.045		0.398599	0.366488	700.241		0.402086	0.363694	646.2		0.411323	0.361033	620.566		0.444352	0.367081	482.137		0.448271	0.357187	429.571
0.40251	0.364079	474.002		0.407503	0.375392	716.775		0.411294	0.372903	662.627		0.420533	0.370244	636.5		0.453825	0.376554	493.959		0.457793	0.366709	439.961
0.411503	0.373071	483.184		0.416771	0.38466	733.648		0.420445	0.382054	679.384		0.429693	0.379404	652.709		0.463541	0.386271	505.977		0.467301	0.376217	450.516
0.420567	0.382136	492.614		0.426076	0.393966	750.791		0.429563	0.391172	696.436		0.438944	0.388655	669.297		0.473303	0.396032	518.243		0.47722	0.386136	461.273
0.429605	0.391174	502.224		0.435212	0.403101	768.093		0.438999	0.400608	713.857		0.448307	0.398018	686.26		0.483141	0.40587	530.808		0.487341	0.396257	472.225
0.438728	0.400296	512.064		0.444444	0.412334	785.6		0.448523	0.410132	731.683		0.457657	0.407367	703.545		0.493013	0.415742	543.639		0.497219	0.406135	483.349
0.448131	0.4097	522.177		0.453862	0.421752	803.306		0.457969	0.419578	749.796		0.467118	0.416828	721.218		0.502872	0.425602	556.731		0.506952	0.415868	494.621
0.457766	0.419335	532.526		0.463374	0.431263	821.205		0.467374	0.428983	768.137		0.476935	0.426646	739.278		0.512809	0.435538	570.083		0.516817	0.425733	506.024
0.467343	0.428912	543.204		0.472898	0.440787	839.302		0.477004	0.438613	786.817		0.486906	0.436616	757.581		0.522954	0.445683	583.592		0.526704	0.43562	517.498
0.477034	0.438603	554.146		0.482546	0.450435	857.646		0.486922	0.448531	805.846		0.496778	0.446489	776.057		0.532958	0.455688	597.157		0.536626	0.445542	528.937
0.4871	0.448669	565.327		0.492334	0.460224	876.205		0.496922	0.458531	825.125		0.506807	0.456518	794.793		0.542814	0.465543	610.817		0.54671	0.455626	540.281
0.497143	0.458712	576.7		0.502241	0.47013	894.883		0.506846	0.468454	844.653		0.517113	0.466824	813.801		0.552854	0.475583	624.65		0.556751	0.465667	551.7
0.507026	0.468595	588.292		0.512458	0.480348	913.653		0.516799	0.478408	864.45		0.527143	0.476853	833.053		0.563008	0.485737	638.626		0.566705	0.475621	563.35
0.516885	0.478454	600.092		0.522701	0.49059	932.524		0.526894	0.488503	884.393		0.536904	0.486615	852.509		0.572842	0.495571	652.768		0.576662	0.485578	575.242
0.526772	0.48834	612.033		0.532758	0.500647	951.444		0.536955	0.498564	904.393		0.546762	0.496473	872.153		0.582657	0.505387	667.08		0.586378	0.495294	587.287
0.536585	0.498154	624.052		0.542638	0.510527	970.315		0.546859	0.508468	924.508		0.556721	0.506432	891.951		0.592684	0.515413	681.52		0.595996	0.504912	599.373
0.5466	0.508169	636.152		0.552579	0.520468	989.169		0.556825	0.518434	944.743		0.566599	0.516309	911.835		0.602656	0.525385	696.002		0.606069	0.514985	611.508
0.556753	0.518321	648.377		0.562652	0.530542	1007.93		0.566662	0.528271	965.081		0.576608	0.526318	931.785		0.612649	0.535378	710.531		0.616437	0.525353	623.775
0.566716	0.528285	660.742		0.572732	0.540622	1026.52		0.576448	0.538057	985.562		0.586706	0.536416	951.892		0.622862	0.545592	725.183		0.626683	0.535599	636.211
0.576677	0.538246	673.307		0.582707	0.550596	1044.95		0.586459	0.548068	1006.22		0.59672	0.546431	972.158		0.633008	0.555737	740.007		0.636721	0.545637	648.849
0.586771	0.54834	686.116		0.592674	0.560563	1063.25		0.596653	0.558261	1026.93		0.606825	0.556535	992.59		0.64291	0.565639	754.971		0.646673	0.555589	661.8
0.596806	0.558375	699.111		0.602785	0.570675	1081.36		0.606647	0.568256	1047.64		0.616946	0.566657	1013.21		0.652895	0.575624	770.105		0.656705	0.565621	674.916
0.606696	0.568264	712.131		0.612878	0.580768	1099.27		0.616665	0.578274	1068.39		0.62697	0.576681	1033.96		0.662907	0.585637	785.434		0.66681	0.575726	687.992
0.616651	0.57822	725.233		0.622831	0.59072	1117.08		0.626979	0.588588	1089.28		0.636848	0.586559	1054.68		0.672774	0.595504	800.85		0.676805	0.585721	701.044
0.626754	0.588323	738.56		0.632764	0.600653	1134.78		0.637113	0.598722	1110.31		0.646736	0.596447	1075.45		0.682546	0.605275	816.3		0.686814	0.59573	714.246
0.636854	0.598423	752.095		0.642608	0.610497	1152.42		0.646955	0.608564	1131.48		0.656771	0.606481	1096.39		0.692509	0.615238	831.942		0.696827	0.605743	727.596
0.646824	0.608393	765.789		0.652475	0.620365	1170.03		0.656758	0.618367	1152.78		0.666802	0.616513	1117.47		0.702609	0.625339	847.849		0.706685	0.615601	741.093
0.656715	0.618284	779.682		0.662504	0.630394	1187.63		0.666704	0.628313	1174.18		0.676685	0.626395	1138.73		0.712679	0.635408	863.913		0.716525	0.625441	754.779
0.666773	0.628342	793.676		0.672627	0.640516	1205.11		0.676576	0.638185	1195.61		0.686538	0.636249	1160.14		0.722665	0.645394	880.116		0.726702	0.635618	768.61
0.676893	0.638462	807.667		0.682629	0.650519	1222.31		0.686583	0.648192	1217.02		0.6966	0.64631	1181.64		0.73277	0.655499	896.467		0.736814	0.64573	782.474
0.686873	0.648442	821.707		0.69268	0.66057	1239.28		0.696703	0.658312	1238.47		0.706704	0.656414	1203.2		0.743011	0.66574	912.916		0.746669	0.655585	796.343
0.696861	0.658429	835.907		0.702977	0.670867	1256.29		0.706731	0.668339	1260		0.716737	0.666448	1224.9		0.753085	0.675814	929.421		0.756706	0.665621	810.33
0.706822	0.668391	850.249		0.713034	0.680924	1273.34		0.716795	0.678404	1281.64		0.726822	0.676533	1246.76		0.763023	0.685752	946.079		0.766983	0.675899	824.5
0.716658	0.678227	864.711		0.722878	0.690767	1290.46		0.726928	0.688537	1303.32		0.736741	0.686452	1268.82		0.772943	0.695672	962.888		0.776928	0.685844	838.86
0.726529	0.688098	879.303		0.732738	0.700628	1307.66		0.736979	0.698587	1324.9		0.746659	0.69637	1291.11		0.782761	0.70549	979.86		0.786695	0.695611	853.352
0.736723	0.698292	893.909		0.742686	0.710575	1324.85		0.746868	0.708477	1346.24		0.756755	0.706465	1313.59		0.792583	0.715313	997.03		0.796597	0.705513	867.978
0.74678	0.708348	908.463		0.752577	0.720467	1342.02		0.756742	0.718351	1367.38		0.766896	0.716606	1336.04		0.802626	0.725355	1014.37		0.806588	0.715504	882.722
0.756666	0.718235	922.978		0.762636	0.730526	1359.19		0.766724	0.728333	1388.5		0.776812	0.726523	1358.44		0.812685	0.735414	1031.8		0.816579	0.725495	897.544
0.76681	0.728379	937.577		0.772771	0.740661	1376.42		0.7766	0.738209	1409.72		0.786742	0.736453	1380.88		0.822601	0.74533	1049.31		0.826723	0.735639	912.446
0.776992	0.738561	952.301		0.782737	0.750626	1393.83		0.786238	0.747847	1431.06		0.796956	0.746667	1403.46		0.832702	0.755432	1066.95		0.836865	0.74578	927.511
0.786831	0.7484	966.697		0.792786	0.760676	1411.54		0.795937	0.757546	1452.43		0.806953	0.756664	1426.17		0.843025	0.765754	1084.75		0.846842	0.755758	942.75
0.796633	0.758202	979.482		0.802937	0.770827	1429.39		0.805904	0.767513	1473.76		0.816715	0.766426	1449.03		0.853077	0.775806	1102.74		0.856916	0.765832	958.165
0.806588	0.768157	990.067		0.81297	0.78086	1447.17		0.816144	0.777753	1494.99		0.826605	0.776315	1472.01		0.862899	0.785628	1120.93		0.866979	0.775894	973.731
0.816549	0.778118	998.473		0.822803	0.790693	1463.65		0.826398	0.788007	1516.22		0.836626	0.786337	1495.03		0.872785	0.795515	1139.27		0.876903	0.785819	989.363
0.825583	0.787152	1004.76		0.832693	0.800582	1477.73		0.836635	0.798244	1537.59		0.846597	0.796307	1518		0.88269	0.805419	1157.68		0.886723	0.795639	1005.02
0.830744	0.792313	1009.04		0.842765	0.810655	1489.27		0.846647	0.808256	1559.1		0.856699	0.806409	1540.96		0.892565	0.815294	1176.05		0.89664	0.805556	1020.82
0.832567	0.794136	1011.36		0.852616	0.820506	1498.35		0.856572	0.818181	1580.76		0.866902	0.816613	1564.01		0.902644	0.825373	1194.29		0.906722	0.815638	1036.77
0.834539	0.796107	1010.13		0.859659	0.827549	1504.98		0.866646	0.828254	1602.51		0.876902	0.826613	1587.15		0.912739	0.835468	1212.54		0.916792	0.825708	1052.82
0.835205	0.796774	1006.56		0.862423	0.830312	1509.2		0.876845	0.838454	1624.06		0.886877	0.836588	1610.4		0.922678	0.845407	1231.04		0.926741	0.835657	1069
0.835582	0.79715	1001.41		0.863499	0.831388	1511.07		0.88679	0.848399	1645.29		0.896903	0.846614	1633.75		0.932652	0.855381	1249.92		0.936762	0.845678	1085.3
0.835793	0.797362	995.909		0.865101	0.832991	1507.54		0.896667	0.858276	1666.33		0.906841	0.856551	1657.07		0.942452	0.865182	1269.09		0.946894	0.85581	1101.64
0.835914	0.797483	990.737		0.865504	0.833393	1502.33		0.906884	0.868493	1687.39		0.916606	0.866317	1680.11		0.951999	0.874728	1288.34		0.956914	0.86583	1118.04
0.835989	0.797558	985.866		0.865729	0.833618	1496.05		0.916997	0.878606	1708.48		0.92645	0.876161	1702.97		0.961895	0.884624	1307.59		0.966839	0.875755	1134.56
0.836036	0.797604	981.172		0.865866	0.833756	1489.87		0.926786	0.888395	1729.47		0.936498	0.886209	1725.86		0.972265	0.894994	1326.96		0.976758	0.885674	1151.2
0.836055	0.797624	976.664		0.86596	0.83385	1484		0.936572	0.898181	1750.26		0.946536	0.896247	1748.84		0.982619	0.905348	1346.55		0.986638	0.895554	1167.99
0.836075	0.797644	972.366		0.866009	0.833899	1478.35		0.946586	0.908195	1771.02		0.956354	0.906065	1771.95		0.992693	0.915422	1366.35		0.99653	0.905446	1184.94
0.836082	0.797651	968.265		0.866034	0.833924	1472.88		0.956609	0.918218	1791.67		0.966142	0.915853	1795.16		1.00263	0.925356	1386.54		1.00662	0.915531	1202.02
0.836076	0.797645	964.345		0.866053	0.833942	1467.62		0.966701	0.92831	1812.16		0.976183	0.925893	1818.36		1.01267	0.935401	1407.06		1.0167	0.925618	1219.12
0.836083	0.797652	960.601		0.866065	0.833955	1462.57		0.976873	0.938481	1832.63		0.986348	0.936059	1841.46		1.0228	0.945525	1427.56		1.02669	0.935603	1236.22
0.836078	0.797647	957.008		0.866067	0.833957	1457.72		0.986928	0.948537	1853.15		0.996549	0.946259	1864.56		1.03282	0.955551	1447.91		1.0368	0.945716	1253.43
0.836073	0.797641	953.55		0.866068	0.833957	1453.06		0.996923	0.958531	1873.75		1.00669	0.9564	1887.74		1.04278	0.96551	1468.35		1.04707	0.955983	1270.76
0.836068	0.797637	950.219		0.866063	0.833953	1448.56		1.0069	0.968511	1894.39		1.01662	0.966333	1911.1		1.05282	0.975551	1488.94		1.05707	0.965987	1288.25
0.836062	0.797631	947.009		0.866059	0.833949	1444.23		1.01682	0.978427	1915.02		1.02649	0.976201	1934.67		1.06271	0.985441	1509.67		1.06689	0.975809	1305.93
0.836061	0.79763	943.906		0.866054	0.833943	1440.04		1.02663	0.988242	1935.57		1.03647	0.986176	1958.41		1.07254	0.995266	1530.59		1.07678	0.985696	1323.76
0.836057	0.797625	940.903		0.866049	0.833939	1435.98		1.03648	0.998088	1955.11		1.04657	0.996282	1982.05		1.08263	1.00536	1551.7		1.08668	0.995591	1341.68
0.83605	0.797618	937.986		0.866042	0.833931	1432.04		1.04649	1.0081	1972.16		1.05655	1.00626	2005.5		1.09279	1.01551	1572.87		1.09657	1.00549	1359.67
0.836048	0.797616	935.155		0.866041	0.833931	1428.22		1.0566	1.01821	1986.32		1.06657	1.01628	2028.83		1.10269	1.02542	1593.96		1.10666	1.01558	1377.76
0.836043	0.797612	932.4		0.866034	0.833924	1424.5		1.06655	1.02816	1997.68		1.07687	1.02658	2052.12		1.11265	1.03538	1615.11		1.11677	1.02569	1396.02
0.836037	0.797606	929.719		0.866035	0.833924	1420.87		1.07412	1.03573	2006.29		1.08699	1.0367	2075.41		1.12293	1.04566	1636.45		1.12678	1.03569	1414.45
0.836034	0.797603	927.104						1.07741	1.03901	2012.16		1.0969	1.04661	2098.71		1.13294	1.05567	1657.99		1.13689	1.04581	1433.08
								1.07859	1.0402	2015.22		1.1068	1.05651	2122		1.14271	1.06544	1679.66		1.147	1.05591	1451.93
								1.08014	1.04175	2012.97		1.11668	1.06639	2145.19		1.15258	1.07531	1701.46		1.15695	1.06587	1470.81
								1.08056	1.04216	2007.85		1.12651	1.07622	2168.2		1.16259	1.08532	1723.36		1.16678	1.0757	1489.62
								1.08079	1.0424	2001.17		1.13657	1.08628	2191.05		1.17256	1.09529	1745.29		1.17672	1.08564	1508.51
								1.08093	1.04254	1994.31		1.14671	1.09642	2213.85		1.18266	1.10539	1767.22		1.18678	1.0957	1527.55
								1.08101	1.04262	1987.69		1.15665	1.10636	2236.58		1.19282	1.11555	1789.27		1.19676	1.10567	1546.71
								1.08107	1.04267	1981.27		1.16664	1.11635	2259.33		1.20283	1.12556	1811.49		1.2066	1.11551	1566.01
								1.08109	1.0427	1975.02		1.17679	1.1265	2281.97		1.2129	1.13563	1833.83		1.21653	1.12545	1585.46
								1.0811	1.0427	1968.96		1.1868	1.13651	2304.57		1.22296	1.14569	1856.27		1.22663	1.13555	1604.97
								1.0811	1.04271	1963.11		1.19665	1.14636	2326.94		1.23291	1.15564	1878.74		1.23669	1.14561	1624.5
								1.0811	1.04271	1957.45		1.20662	1.15633	2349.19		1.24276	1.16549	1901.17		1.24672	1.15564	1644.18
								1.0811	1.04271	1951.99		1.21677	1.16648	2371.48		1.25264	1.17537	1923.64		1.25682	1.16574	1664.01
								1.08109	1.0427	1946.71		1.22688	1.17659	2393.71		1.26267	1.1854	1946.23		1.26678	1.1757	1683.98
								1.08108	1.04269	1941.59		1.23682	1.18653	2415.89		1.27275	1.19548	1968.9		1.27666	1.18558	1704.12
												1.24674	1.19645	2438.08		1.28271	1.20544	1991.67		1.2868	1.19572	1724.41
												1.2568	1.20651	2460.17		1.29268	1.21541	2014.47		1.29693	1.20585	1744.68
												1.26685	1.21657	2482		1.3028	1.22553	2037.26		1.30679	1.21571	1764.88
												1.27678	1.22649	2503.85		1.31291	1.23564	2060.03		1.31675	1.22566	1785.11
												1.28681	1.23652	2525.6		1.32286	1.24559	2082.85		1.32695	1.23587	1805.51
												1.29677	1.24648	2547.19		1.33277	1.2555	2105.7		1.33691	1.24583	1826.07
												1.3066	1.25631	2568.56		1.34264	1.26537	2128.61		1.34669	1.25561	1846.73
												1.31654	1.26625	2589.71		1.35252	1.27525	2151.63		1.35657	1.26549	1867.54
												1.32675	1.27646	2610.48		1.36257	1.2853	2174.71		1.36661	1.27552	1888.41
												1.33676	1.28647	2630.62		1.37267	1.2954	2197.69		1.37661	1.28553	1909.23
												1.34662	1.29634	2649.9		1.38266	1.30539	2220.51		1.38671	1.29563	1930.02
												1.3568	1.30651	2667.28		1.39273	1.31546	2243.28		1.39689	1.3058	1950.92
												1.36698	1.31669	2677.39		1.40301	1.32574	2266.08		1.40691	1.31583	1971.96
												1.38656	1.33627	2669.41		1.41307	1.3358	2288.91		1.41691	1.32583	1993.12
												1.39655	1.34627	2658.2		1.42292	1.34565	2311.79		1.42685	1.33576	2014.38
												1.40656	1.35627	2644.81		1.43277	1.3555	2334.71		1.43678	1.3457	2035.69
												1.41664	1.36635	2629.73		1.44269	1.36542	2357.57		1.44665	1.35556	2056.93
												1.42689	1.3766	2613.29		1.4526	1.37532	2380.31		1.45651	1.36542	2078.18
												1.437	1.38671	2595.9		1.46266	1.38539	2402.94		1.46651	1.37542	2099.57
												1.447	1.39671	2577.99		1.47278	1.3955	2425.56		1.47663	1.38554	2121.1
												1.45702	1.40673	2560.88		1.48277	1.40549	2448.19		1.4867	1.39562	2142.69
												1.46699	1.4167	2550.08		1.49285	1.41558	2470.86		1.49672	1.40563	2164.28
												1.47688	1.42659	2548.82		1.50298	1.42571	2493.58		1.50693	1.41585	2185.84
												1.48672	1.43643	2553.85		1.51296	1.43569	2516.22		1.51714	1.42605	2207.38
												1.49666	1.44637	2561.89		1.52279	1.44552	2538.62		1.52708	1.436	2228.94
												1.50674	1.45645	2571.57		1.53268	1.45541	2560.89		1.53695	1.44587	2250.51
												1.51679	1.4665	2582.39		1.54274	1.46547	2583.17		1.54676	1.45568	2272.13
												1.52671	1.47642	2594.21		1.55275	1.47548	2605.39		1.55663	1.46554	2293.91
												1.53674	1.48645	2606.77		1.56262	1.48535	2627.61		1.56662	1.47553	2315.79
												1.54689	1.4966	2619.9		1.57252	1.49525	2649.83		1.57668	1.4856	2337.64
												1.55689	1.5066	2633.62		1.58262	1.50535	2672.01		1.58661	1.49553	2359.5
												1.56683	1.51654	2647.9		1.59271	1.51544	2694.02		1.59667	1.50559	2381.42
												1.5767	1.52641	2662.6		1.6027	1.52543	2715.96		1.60698	1.51589	2403.4
												1.58656	1.53627	2677.7		1.61278	1.53551	2737.88		1.61703	1.52595	2425.42
												1.59651	1.54622	2693.12		1.62276	1.54549	2759.77		1.62694	1.53585	2447.55
												1.60667	1.55638	2708.65		1.63265	1.55537	2781.62		1.63685	1.54577	2469.74
												1.61671	1.56642	2724.19		1.64271	1.56543	2803.46		1.64674	1.55565	2491.91
												1.62666	1.57637	2739.74		1.6529	1.57563	2825.11		1.65655	1.56547	2513.98
												1.63685	1.58656	2755.44		1.66282	1.58555	2846.45		1.66662	1.57553	2535.97
												1.64702	1.59674	2771.21		1.6727	1.59543	2867.59		1.67671	1.58562	2557.95
												1.65696	1.60667	2787.06		1.68294	1.60567	2888.67		1.68663	1.59555	2579.93
												1.66682	1.61653	2802.94		1.69298	1.61571	2909.72		1.69668	1.60559	2602.03
												1.67674	1.62645	2818.81		1.70274	1.62546	2930.69		1.70682	1.61574	2624.29
												1.68658	1.63629	2834.6		1.71256	1.63529	2951.57		1.7168	1.62572	2646.57
												1.69658	1.64629	2850.34		1.72261	1.64534	2972.31		1.72665	1.63557	2668.65
												1.70675	1.65646	2866.11		1.73261	1.65533	2992.8		1.73666	1.64557	2690.71
												1.7168	1.66651	2881.91		1.74269	1.66542	3013.01		1.74681	1.65573	2712.81
												1.72677	1.67648	2897.78		1.75286	1.67559	3033.12		1.75688	1.66579	2734.88
												1.73691	1.68662	2913.8		1.7629	1.68563	3053.19		1.76677	1.67568	2756.98
												1.747	1.69671	2929.89		1.77288	1.69561	3073.18		1.77672	1.68563	2779.18
												1.75688	1.70659	2945.82		1.78281	1.70554	3093.03		1.78681	1.69572	2801.34
												1.76669	1.7164	2961.02		1.79278	1.71551	3112.72		1.79684	1.70576	2823.3
												1.77669	1.7264	2974.3		1.8027	1.72543	3132.12		1.80676	1.71568	2845.18
												1.78676	1.73647	2985.08		1.81255	1.73528	3151.3		1.8168	1.72572	2867.13
												1.79668	1.74639	2993.27		1.82251	1.74524	3170.42		1.82677	1.73568	2889.13
												1.80547	1.75518	2998.94		1.83262	1.75535	3189.47		1.83657	1.74548	2911.14
												1.81085	1.76056	3002.08		1.84269	1.76542	3208.38		1.84654	1.75545	2933.25
												1.81598	1.76569	3000.31		1.8527	1.77543	3227.07		1.85677	1.76569	2955.33
												1.81778	1.76749	2995.36		1.86288	1.7856	3245.48		1.86676	1.77568	2977.21
												1.81906	1.76877	2987.85		1.87311	1.79584	3263.62		1.87666	1.78558	2998.93
												1.81984	1.76955	2978.39		1.88309	1.80582	3281.6		1.88688	1.7958	3020.72
												1.82027	1.76998	2968.33		1.893	1.81573	3299.41		1.89699	1.8059	3042.62
												1.8205	1.77021	2958.29		1.90282	1.82555	3317.07		1.90677	1.81569	3064.59
												1.82063	1.77034	2948.3		1.91264	1.83536	3334.69		1.91656	1.82548	3086.58
												1.82072	1.77043	2938.4		1.92259	1.84532	3352.23		1.92656	1.83548	3108.58
												1.82076	1.77047	2928.69		1.9327	1.85543	3369.53		1.93654	1.84546	3130.52
												1.82078	1.77049	2919.28		1.94266	1.86539	3386.62		1.9466	1.85552	3152.27
												1.8208	1.77051	2910.2		1.95269	1.87541	3403.58		1.9568	1.86572	3173.96
												1.8208	1.77051	2901.48		1.96296	1.88569	3420.43		1.96689	1.87581	3195.65
												1.82081	1.77052	2893.1		1.97304	1.89577	3437.12		1.97695	1.88587	3217.36
												1.8208	1.77051	2885.05		1.98295	1.90568	3453.7		1.98699	1.89591	3239.03
												1.8208	1.77051	2877.3		1.99289	1.91562	3470.12		1.99697	1.90589	3260.63
												1.82079	1.7705	2869.82		2.00278	1.92551	3486.29		2.00685	1.91576	3282.01
												1.82079	1.7705	2862.6		2.01258	1.93531	3502.16		2.01668	1.92559	3303.17
												1.82079	1.7705	2855.61		2.02262	1.94534	3517.73		2.02663	1.93555	3324.28
												1.82078	1.77049	2848.83		2.03271	1.95544	3533.11		2.03672	1.94563	3345.36
												1.82077	1.77048	2842.25		2.04264	1.96537	3548.23		2.04677	1.95568	3366.39
																2.05265	1.97538	3563.23		2.0567	1.96562	3387.34
																2.06281	1.98554	3578.25		2.06677	1.97569	3408.18
																2.07287	1.99559	3593.13		2.07695	1.98587	3428.88
																2.08271	2.00544	3607.66		2.08692	1.99584	3449.47
																2.09263	2.01536	3621.96		2.0968	2.00572	3469.92
																2.10281	2.02554	3636.2		2.10663	2.01554	3490.22
																2.11293	2.03566	3650.27		2.11652	2.02543	3510.46
																2.12281	2.04554	3664.15		2.12653	2.03545	3530.64
																2.13271	2.05544	3677.99		2.13668	2.0456	3550.55
																2.14281	2.06554	3691.72		2.14667	2.05559	3570.16
																2.15288	2.07561	3705.15		2.15667	2.06559	3589.54
																2.16278	2.08551	3718.3		2.16693	2.07585	3608.75
																2.1728	2.09553	3731.36		2.17705	2.08597	3627.73
																2.18279	2.10552	3744.29		2.18693	2.09585	3646.55
																2.19261	2.11534	3757.02		2.19678	2.1057	3665.23
																2.20254	2.12527	3769.6		2.20671	2.11563	3683.71
																2.21277	2.1355	3781.93		2.21659	2.1255	3701.88
																2.22282	2.14555	3793.83		2.2266	2.13551	3719.73
																2.23269	2.15542	3805.29		2.23674	2.14566	3737.37
																2.24288	2.1656	3816.57		2.24676	2.15568	3754.76
																2.25304	2.17577	3827.75		2.25676	2.16568	3771.99
																2.26285	2.18558	3838.72		2.26688	2.1758	3789.16
																2.27258	2.19531	3849.48		2.27695	2.18586	3806.16
																2.28255	2.20528	3860.12		2.28676	2.19567	3822.73
																2.29257	2.21529	3870.57		2.2966	2.20552	3838.96
																2.30261	2.22534	3880.74		2.3067	2.21562	3854.97
																2.31279	2.23552	3890.7		2.31681	2.22573	3870.77
																2.32292	2.24565	3900.59		2.32671	2.23563	3886.31
																2.33296	2.25569	3910.43		2.3366	2.24552	3901.71
																2.343	2.26573	3920.16		2.34669	2.2556	3916.93
																2.35299	2.27571	3929.79		2.35675	2.26567	3931.77
																2.36292	2.28564	3939.35		2.36672	2.27563	3946.26
																2.37278	2.29551	3948.79		2.37681	2.28572	3960.54
																2.38268	2.30541	3958.22		2.38686	2.29577	3974.65
																2.3927	2.31543	3967.59		2.39671	2.30563	3988.58
																2.40276	2.32549	3975.52		2.40664	2.31555	4002.37
																2.41273	2.33546	3980.64		2.41682	2.32574	4015.87
																2.42279	2.34552	3982.72		2.42687	2.33578	4028.9
																2.4328	2.35553	3980.42		2.43676	2.34567	4041.48
																2.43997	2.3627	3975.23		2.44694	2.35586	4053.83
																2.44273	2.36546	3967.43		2.4571	2.36602	4066.01
																2.44375	2.36647	3957.07		2.46687	2.37579	4078.04
																2.44456	2.36729	3944.25		2.47661	2.38553	4089.89
																2.44521	2.36794	3929		2.48663	2.39555	4101.54
																2.44561	2.36833	3911.49		2.49664	2.40555	4112.84
																2.44583	2.36856	3893.19		2.50666	2.41557	4123.71
																2.44596	2.36868	3875.6		2.51684	2.42575	4134.33
																2.44602	2.36875	3859.04		2.52698	2.43589	4144.85
																2.44607	2.3688	3844.84		2.53699	2.44591	4155.26
																2.4461	2.36883	3831.49		2.54694	2.45585	4165.53
																2.44611	2.36884	3818.74		2.55683	2.46575	4175.66
																2.44612	2.36885	3806.57		2.56673	2.47565	4185.54
																2.44612	2.36885	3794.9		2.57657	2.48549	4195.09
																2.44612	2.36885	3783.7		2.58647	2.49539	4204.49
																2.44611	2.36884	3772.95		2.59654	2.50545	4213.87
																2.44611	2.36884	3762.58		2.60671	2.51563	4223.21
																2.4461	2.36883	3752.58		2.61672	2.52564	4232.44
																2.4461	2.36882	3742.93		2.6268	2.53572	4241.41
																2.44609	2.36882	3733.61		2.63706	2.54598	4250.15
																				2.64715	2.55606	4258.72
																				2.65707	2.56599	4267.14
																				2.66686	2.57577	4275.4
																				2.67663	2.58554	4283.6
																				2.68654	2.59545	4291.76
																				2.69664	2.60555	4299.66
																				2.70666	2.61557	4307.24
																				2.71665	2.62557	4313.19
																				2.72689	2.63581	4317.59
																				2.73707	2.64599	4321.45
																				2.74699	2.6559	4324.85
																				2.7569	2.66581	4327.86
																				2.76682	2.67574	4330.34
																				2.77661	2.68553	4332.25
																				2.78654	2.69545	4333.63
																				2.79668	2.7056	4334.64
																				2.8067	2.71562	4335.31
																				2.81667	2.72558	4337.19
																				2.82682	2.73573	4340.45
																				2.8369	2.74581	4343.93
																				2.84675	2.75567	4347.3
																				2.85664	2.76556	4350.54
																				2.86681	2.77572	4353.9
																				2.87699	2.7859	4357.4
																				2.88694	2.79585	4360.92
																				2.89681	2.80572	4364.58
																				2.90682	2.81574	4368.34
																				2.91693	2.82584	4371.92
																				2.92683	2.83575	4375.21
																				2.93679	2.84571	4378.47
																				2.94687	2.85578	4381.74
																				2.95676	2.86567	4384.89
																				2.9666	2.87551	4387.93
																				2.97675	2.88567	4390.83
																				2.98689	2.89581	4393.43
																				2.99677	2.90569	4395.65
																				3.00682	2.91574	4397.69
																				3.01706	2.92598	4399.77
																				3.02694	2.93586	4401.92
																				3.03666	2.94557	4404.05
																				3.04655	2.95547	4406.18
																				3.05657	2.96548	4408.33
																				3.06662	2.97553	4410.41
																				3.07674	2.98565	4412.43
																				3.0869	2.99582	4414.53
																				3.09696	3.00587	4416.68
																				3.10698	3.0159	4418.79
																				3.11697	3.02588	4420.79
																				3.12692	3.03583	4422.57
																				3.1368	3.04572	4424.1
																				3.14673	3.05565	4425.47
																				3.15676	3.06568	4426.81
																				3.16682	3.07574	4428.09
																				3.17677	3.08568	4429.31
																				3.18675	3.09567	4430.4
																				3.19691	3.10582	4431.4
																				3.207	3.11592	4432.35
																				3.22678	3.13569	4434.32
																				3.23663	3.14554	4435.36
																				3.24656	3.15548	4436.54
																				3.25665	3.16556	4437.75
																				3.26672	3.17563	4438.89
																				3.2767	3.18561	4439.99
																				3.28679	3.19571	4441.18
																				3.29705	3.20597	4442.4
																				3.30704	3.21596	4443.71
																				3.31692	3.22583	4445.13
																				3.32684	3.23575	4446.66
																				3.33671	3.24563	4448.16
																				3.34662	3.25554	4449.56
																				3.35674	3.26566	4450.9
																				3.36685	3.27577	4452.19
																				3.37682	3.28574	4453.45
																				3.38691	3.29583	4454.77
																				3.397	3.30592	4456.16
																				3.40692	3.31583	4457.43
																				3.41674	3.32565	4458.46
																				3.42671	3.33563	4459.46
																				3.43683	3.34575	4460.55
																				3.44683	3.35575	4461.67
																				3.45669	3.36561	4462.91
																				3.46667	3.37558	4464.28
																				3.47676	3.38568	4465.67
																				3.48678	3.3957	4466.94
																				3.49678	3.40569	4468.23
																				3.50688	3.41579	4469.56
																				3.51681	3.42573	4470.95
																				3.5267	3.43562	4472.35
																				3.53683	3.44575	4473.73
																				3.54697	3.45589	4474.91
																				3.56677	3.47569	4476.5
																				3.57704	3.48596	4477.17
																				3.59674	3.50566	4478.22
																				3.61666	3.52557	4478.59
																				3.62668	3.5356	4478.28
																				3.63679	3.54571	4477.62
																				3.64697	3.55589	4476.8
																				3.65699	3.56591	4475.88
																				3.66699	3.5759	4474.87
																				3.67688	3.5858	4473.77
																				3.68679	3.59571	4472.58
																				3.69667	3.60558	4471.24
																				3.70655	3.61547	4469.83
																				3.71656	3.62548	4468.53
																				3.72671	3.63563	4467.38
																				3.73676	3.64567	4466.37
																				3.74676	3.65567	4465.41
																				3.75693	3.66584	4464.52
																				3.7671	3.67602	4463.7
																				3.78697	3.69589	4462.41
																				3.80667	3.71558	4462.09
																				3.81668	3.7256	4462.42
																				3.82673	3.73564	4462.99
																				3.84672	3.75564	4464.87
																				3.85697	3.76589	4466.23
																				3.86701	3.77593	4467.81
																				3.87694	3.78586	4469.65
																				3.88688	3.79579	4471.73
																				3.89676	3.80568	4473.88
																				3.90662	3.81554	4476.01
																				3.91668	3.8256	4478.2
																				3.92678	3.8357	4480.41
																				3.93669	3.8456	4482.65
																				3.94672	3.85563	4485.04
																				3.95688	3.8658	4487.64
																				3.96688	3.8758	4490.22
																				3.9767	3.88561	4492.6
																				3.98668	3.8956	4494.89
																				3.9969	3.90582	4497.26
																				4.00703	3.91595	4499.63
																				4.01691	3.92583	4501.96
																				4.0268	3.93572	4504.39
																				4.03686	3.94578	4506.78
																				4.04689	3.9558	4508.76
																				4.05677	3.96569	4510.46
																				4.06683	3.97574	4512.18
																				4.07683	3.98575	4513.92
																				4.08667	3.99558	4515.66
																				4.09667	4.00559	4517.42
																				4.10686	4.01578	4519.1
																				4.11681	4.02572	4520.53
																				4.12668	4.0356	4521.7
																				4.13691	4.04583	4522.81
																				4.14702	4.05594	4524.17
																				4.1568	4.06571	4525.66
																				4.16659	4.0755	4527.17
																				4.17659	4.08551	4528.68
																				4.18659	4.09551	4530.14
																				4.19665	4.10556	4531.48
																				4.20684	4.11575	4532.78
																				4.21696	4.12587	4534.1
																				4.227	4.13592	4535.47
																				4.237	4.14591	4536.82
																				4.24695	4.15587	4538.11
																				4.25684	4.16576	4539.21
																				4.27667	4.18559	4540.81
																				4.28677	4.19569	4541.45
																				4.29682	4.20574	4541.97
																				4.3168	4.22572	4542.34
																				4.32694	4.23586	4542.23
																				4.33697	4.24588	4541.98
																				4.35667	4.26559	4540.95
																				4.37659	4.28551	4539.77
																				4.3867	4.29562	4539.04
																				4.40667	4.31559	4537.26
																				4.41695	4.32587	4536.42
																				4.42709	4.33601	4535.61
																				4.44685	4.35576	4534.24
																				4.46666	4.37557	4533.08
																				4.47671	4.38562	4532.46
																				4.48683	4.39575	4531.92
																				4.50683	4.41575	4531.19
																				4.51697	4.42589	4531.17
																				4.52703	4.43594	4531.3
																				4.54666	4.45558	4531.54
																				4.55675	4.46567	4531.99
																				4.56683	4.47574	4532.68
																				4.58662	4.49554	4534.73
																				4.5967	4.50562	4536.05
																				4.60682	4.51573	4537.38
																				4.61677	4.52569	4538.73
																				4.62682	4.53573	4540.23
																				4.63682	4.54574	4541.88
																				4.64672	4.55563	4543.61
																				4.6567	4.56562	4545.42
																				4.66693	4.57584	4547.26
																				4.67694	4.58585	4549.02
																				4.68676	4.59568	4550.72
																				4.69689	4.60581	4552.61
																				4.70705	4.61597	4554.73
																				4.71688	4.62579	4557.06
																				4.72664	4.63555	4559.59
																				4.73663	4.64554	4562.28
																				4.74665	4.65556	4565.06
																				4.75668	4.6656	4567.84
																				4.76684	4.67576	4570.71
																				4.77698	4.6859	4573.74
																				4.78698	4.6959	4576.91
																				4.79691	4.70583	4580.18
																				4.80684	4.71576	4583.51
																				4.81676	4.72568	4586.79
																				4.8266	4.73552	4589.98
																				4.83653	4.74545	4593.21
																				4.84661	4.75553	4596.56
																				4.8567	4.76562	4600
																				4.86674	4.77566	4603.44
																				4.87682	4.78574	4606.77
																				4.88704	4.79595	4610
																				4.8971	4.80601	4613.13
																				4.90702	4.81593	4616.18
																				4.91682	4.82573	4619.12
																				4.92662	4.83554	4621.99
																				4.93656	4.84547	4624.8
																				4.94665	4.85557	4627.32
																				4.95669	4.86561	4629.4
																				4.96667	4.87559	4631.03
																				4.97689	4.8858	4632.18
																				4.98707	4.89599	4632.63
																				5.00689	4.91581	4630.96
																				5.01681	4.92573	4628.74
																				5.02662	4.93554	4625.76
																				5.03659	4.9455	4622.28
																				5.04675	4.95567	4618.65
																				5.05678	4.96569	4615.07
																				5.06671	4.97563	4611.8
																				5.07684	4.98575	4609.19
																				5.08697	4.99588	4607.45
																				5.10666	5.01558	4606.75
																				5.11674	5.02565	4608.03
																				5.12689	5.03581	4610.3
																				5.13689	5.04581	4613.25
																				5.1468	5.05572	4616.81
																				5.15684	5.06575	4620.83
																				5.16693	5.07585	4625.06
																				5.17687	5.08579	4629.35
																				5.18684	5.09575	4633.77
																				5.19687	5.10579	4638.31
																				5.20674	5.11565	4642.87
																				5.21657	5.12549	4647.5
																				5.22674	5.13565	4652.13
																				5.23688	5.14579	4656.57
																				5.24674	5.15566	4660.73
																				5.25679	5.1657	4664.82
																				5.26705	5.17596	4668.95
																				5.27694	5.18586	4673.12
																				5.28662	5.19554	4677.26
																				5.29654	5.20545	4681.25
																				5.30657	5.21549	4685.11
																				5.31659	5.2255	4688.77
																				5.32672	5.23563	4692.26
																				5.33686	5.24578	4695.71
																				5.34691	5.25583	4699.2
																				5.35697	5.26589	4702.64
																				5.36701	5.27593	4705.97
																				5.37695	5.28587	4709.15
																				5.3868	5.29572	4712.13
																				5.39669	5.3056	4715.12
																				5.40671	5.31563	4718.21
																				5.4168	5.32571	4721.34
																				5.42675	5.33567	4724.51
																				5.43674	5.34565	4727.65
																				5.44691	5.35582	4730.74
																				5.45701	5.36593	4733.81
																				5.46695	5.37586	4736.93
																				5.47678	5.3857	4740.07
																				5.48664	5.39555	4743.3
																				5.49655	5.40547	4746.68
																				5.50663	5.41555	4750.05
																				5.51671	5.42563	4753.27
																				5.52668	5.43559	4756.35
																				5.53684	5.44575	4759.41
																				5.54711	5.45602	4762.44
																				5.55704	5.46596	4765.45
																				5.56687	5.47578	4768.48
																				5.5768	5.48572	4771.47
																				5.58668	5.4956	4774.34
																				5.5966	5.50552	4777.05
																				5.60674	5.51566	4779.68
																				5.61687	5.52579	4782.32
																				5.62683	5.53574	4785.02
																				5.63692	5.54583	4787.86
																				5.64702	5.55594	4790.84
																				5.65693	5.56584	4793.75
																				5.66673	5.57565	4796.48
																				5.67668	5.58559	4799.17
																				5.68682	5.59574	4801.91
																				5.69682	5.60574	4804.65
																				5.70668	5.6156	4807.42
																				5.71665	5.62557	4810.21
																				5.72678	5.63569	4812.92
																				5.7368	5.64572	4815.42
																				5.74683	5.65574	4817.8
																				5.75692	5.66583	4820.17
																				5.76683	5.67574	4822.5
																				5.77668	5.6856	4824.77
																				5.78676	5.69568	4826.96
																				5.7969	5.70582	4828.88
																				5.80683	5.71574	4830.45
																				5.8168	5.72572	4831.83
																				5.82708	5.73599	4833.19
																				5.83708	5.746	4834.56
																				5.84675	5.75567	4835.9
																				5.85658	5.7655	4837.18
																				5.86663	5.77554	4838.37
																				5.87669	5.78561	4839.43
																				5.88676	5.79568	4840.38
																				5.89691	5.80583	4841.36
																				5.90697	5.81589	4842.46
																				5.91701	5.82592	4843.66
																				5.92695	5.83587	4844.9
																				5.93686	5.84577	4846.17
																				5.94668	5.85559	4847.39
																				5.95655	5.86546	4848.65
																				5.96656	5.87547	4850.11
																				5.97667	5.88559	4851.74
																				5.98675	5.89567	4853.52
																				5.99674	5.90565	4855.36
																				6.00689	5.9158	4857.23
																				6.01707	5.92599	4859.08
																				6.02704	5.93595	4860.96
																				6.03693	5.94584	4862.84
																				6.0468	5.95571	4864.78
																				6.05667	5.96559	4866.82
																				6.06665	5.97557	4868.84
																				6.07672	5.98563	4870.71
																				6.0867	5.99561	4872.49
																				6.0968	6.00571	4874.29
																				6.10705	6.01597	4876.11
																				6.11707	6.02599	4878.01
																				6.12697	6.03588	4880.04
																				6.1369	6.04582	4882.17
																				6.14674	6.05566	4884.24
																				6.15657	6.06548	4886.27
																				6.16666	6.07557	4888.33
																				6.17681	6.08573	4890.46
																				6.18674	6.09565	4892.64
																				6.19677	6.10569	4894.97
																				6.2069	6.11582	4897.49
																				6.21688	6.12579	4899.99
																				6.2267	6.13561	4902.26
																				6.23667	6.14559	4904.41
																				6.24687	6.15579	4906.63
																				6.25699	6.1659	4908.82
																				6.26687	6.17579	4910.97
																				6.27675	6.18566	4913.16
																				6.28684	6.19576	4915.28
																				6.29692	6.20584	4917.17
																				6.30682	6.21574	4918.99
																				6.31684	6.22576	4920.85
																				6.32681	6.23572	4922.77
																				6.33661	6.24553	4924.69
																				6.34661	6.25553	4926.6
																				6.35687	6.26579	4928.38
																				6.36688	6.2758	4929.87
																				6.37678	6.28569	4931.13
																				6.387	6.29592	4932.36
																				6.39706	6.30598	4933.6
																				6.4068	6.31571	4934.72
																				6.42655	6.33547	4936.47
																				6.4366	6.34552	4937.01
																				6.44668	6.35559	4937.24
																				6.45687	6.36579	4937.31
																				6.46699	6.37591	4937.34
																				6.47701	6.38592	4937.3
																				6.49693	6.40584	4936.6
																				6.51673	6.42565	4934.75
																				6.52669	6.43561	4933.53
																				6.53676	6.44568	4932.21
																				6.5468	6.45572	4930.76
																				6.55674	6.46566	4929.02
																				6.56679	6.4757	4926.89
																				6.57697	6.48588	4924.35
																				6.587	6.49592	4921.46
																				6.59689	6.5058	4918.24
																				6.60673	6.51564	4914.67
																				6.61664	6.52556	4910.83
																				6.62664	6.53555	4906.76
																				6.63671	6.54562	4902.23
																				6.64668	6.55559	4897.24
																				6.6567	6.56561	4891.91
																				6.66699	6.57591	4886.35
																				6.67708	6.586	4880.56
																				6.68698	6.59589	4874.65
																				6.69687	6.60579	4868.71
																				6.70683	6.61574	4862.65
																				6.71669	6.62561	4856.4
																				6.72672	6.63563	4849.99
																				6.73686	6.64578	4843.53
																				6.74689	6.6558	4837.03
																				6.75689	6.66581	4830.63
																				6.76702	6.67593	4824.36
																				6.77702	6.68593	4818.14
																				6.78682	6.69574	4811.83
																				6.7967	6.70561	4805.49
																				6.80678	6.7157	4799.29
																				6.81686	6.72577	4793.25
																				6.82676	6.73568	4787.36
																				6.83665	6.74557	4781.81
																				6.84671	6.75562	4776.58
																				6.85678	6.7657	4771.56
																				6.86673	6.77565	4766.84
																				6.87682	6.78573	4762.56
																				6.88687	6.79579	4758.66
																				6.89674	6.80566	4755.09
																				6.90671	6.81563	4751.82
																				6.91695	6.82586	4748.72
																				6.92697	6.83588	4745.6
																				6.93682	6.84574	4742.4
																				6.94697	6.85589	4739.18
																				6.95711	6.86602	4736
																				6.96689	6.87581	4732.85
																				6.97664	6.88556	4729.71
																				6.98665	6.89556	4726.5
																				6.99666	6.90558	4723.17
																				7.00672	6.91563	4719.66
																				7.01688	6.92579	4716.11
																				7.02699	6.93591	4712.59
																				7.03701	6.94592	4709.07
																				7.04697	6.95589	4705.53
																				7.05687	6.96578	4701.92
																				7.06673	6.97565	4698.1
																				7.07657	6.98548	4694.05
																				7.08653	6.99544	4689.98
																				7.09666	7.00558	4686
																				7.10679	7.01571	4682.1
																				7.11676	7.02568	4678.26
																				7.12682	7.03574	4674.5
																				7.13708	7.046	4670.9
																				7.14712	7.05604	4667.59
																				7.15701	7.06593	4664.64
																				7.16688	7.07579	4662.07
																				7.17673	7.08565	4659.93
																				7.18666	7.09558	4658.17
																				7.19672	7.10563	4656.58
																				7.20671	7.11563	4655.11
																				7.21669	7.12561	4653.74
																				7.22692	7.13584	4652.52
																				7.23708	7.14599	4651.37
																				7.24701	7.15593	4650.3
																				7.25693	7.16585	4649.29
																				7.26684	7.17576	4648.21
																				7.27663	7.18554	4646.98
																				7.2866	7.19551	4645.64
																				7.29674	7.20566	4644.31
																				7.30674	7.21566	4642.98
																				7.31668	7.22559	4641.74
																				7.32682	7.23573	4640.7
																				7.33694	7.24586	4639.78
																				7.3468	7.25571	4638.74
																				7.35664	7.26556	4637.53
																				7.36677	7.27569	4636.35
																				7.37697	7.28589	4635.21
																				7.38692	7.29584	4634.01
																				7.3968	7.30572	4632.79
																				7.40684	7.31575	4631.6
																				7.41697	7.32588	4630.26
																				7.42689	7.33581	4628.73
																				7.43684	7.34576	4627.22
																				7.44687	7.35578	4625.78
																				7.45676	7.36568	4624.41
																				7.46662	7.37553	4623.2
																				7.4768	7.38571	4622.03
																				7.4869	7.39581	4620.74
																				7.49674	7.40566	4619.23
																				7.50678	7.4157	4617.6
																				7.51705	7.42597	4615.93
																				7.52698	7.43589	4614.12
																				7.5367	7.44562	4612
																				7.5466	7.45552	4609.49
																				7.5566	7.46551	4606.46
																				7.56663	7.47554	4602.77
																				7.57676	7.48568	4598.51
																				7.58693	7.49585	4593.87
																				7.59696	7.50588	4588.93
																				7.60701	7.51592	4583.65
																				7.61701	7.52593	4578.02
																				7.62695	7.53586	4572
																				7.6368	7.54572	4565.66
																				7.6467	7.55562	4559.14
																				7.65676	7.56567	4552.63
																				7.66683	7.57575	4546.2
																				7.6768	7.58572	4539.83
																				7.6868	7.59572	4533.38
																				7.69695	7.60586	4526.77
																				7.70703	7.61595	4519.99
																				7.71699	7.6259	4513.12
																				7.72683	7.63575	4506.11
																				7.73667	7.64558	4498.92
																				7.7466	7.65552	4491.57
																				7.75671	7.66562	4483.88
																				7.76674	7.67565	4475.7
																				7.77667	7.68559	4467.01
																				7.78681	7.69572	4457.94
																				7.79706	7.70598	4448.52
																				7.80704	7.71595	4438.73
